# Supplementary material for: A new protocol for nickel-catalysed regio- and stereoselective hydrocyanation of allenes
Source: Royal Society of Chemistry journal article supplement (doi:10.1039/c5cc01899d), 2015-01-01

Electronic supplementary information for

A new protocol for nickel-catalyzed regio- and stereoselective  
hydrocyanation of allene and its derivatives

Graduate School of Pharmaceutical Sciences, Chiba University  
1-8-1 Inohana, Chuo-ku, Chiba 260-8675, Japan  
E-mail: araisgr@chiba-u.jp

List of Contents

1. Experimental procedure for all the reactions: S2-S23
2.  $^1\text{H}$  and  $^{13}\text{C}$  NMR charts for all new compounds: S24-

### Scheme S1. Syntheses of **1b** and **1c**

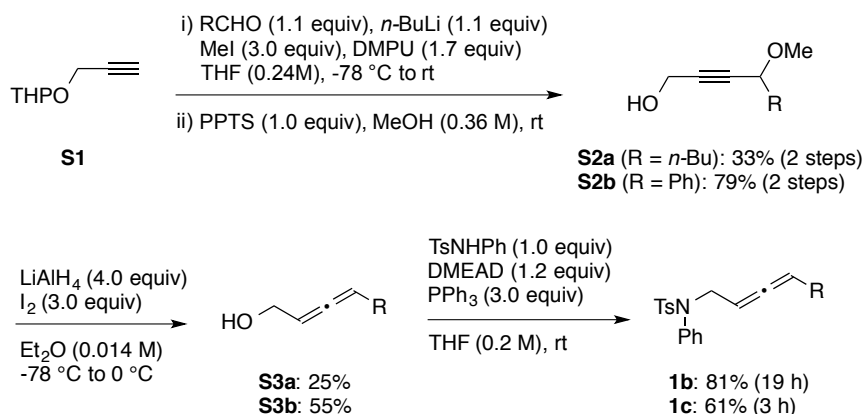

**S3a**, **S3b** were synthesized by the reported procedure<sup>1</sup>.

#### 4-methyl-*N*-(octa-2,3-dien-1-yl)-*N*-phenylbenzenesulfonamide (**1b**)

To a solution of TsNHPH (216 mg, 0.87 mmol) in THF (3.0 mL) was added PPh<sub>3</sub> (274 mg, 1.04 mmol) and the mixture was cooled to 0 °C. Then DMEAD (azodicarboxylic acid bis(2-methoxyethyl) ester, 245 mg, 0.87 mmol) and a solution of **S3a** in THF (1.4 mL) was slowly added and the reaction was warmed to room temperature. After stirring 19 h, the solvent was removed under reduced pressure and the residue was filtrated through a short pad of silica and concentrated in vacuo. The crude product was purified by column chromatography (Hex/AcOEt = 15/1) to afford **1b** as a colorless solid (250 mg, 81%).

Colorless solid. <sup>1</sup>H NMR (CDCl<sub>3</sub>, 600 MHz) δ: 0.81 (t, 3H, *J* = 7.2 Hz), 1.08-1.23 (m, 4H), 1.70-1.76 (m, 2H), 2.42 (s, 3H), 4.06 (ddd, 1H, *J* = 13.8, 7.2, 2.4 Hz), 4.25 (ddd, 1H, *J* = 13.8, 6.6, 3.0 Hz), 4.99-5.05 (m, 2H), 7.04-7.06 (m, 2H), 7.24-7.31 (m, 5H), 7.49 (d, 2H, *J* = 8.4 Hz); <sup>13</sup>C NMR (CDCl<sub>3</sub>, 150 MHz) δ: 13.8, 21.5, 22.0, 27.9, 30.9, 50.6, 86.8, 92.5, 127.67, 127.70, 128.7, 129.0, 129.4, 135.6, 139.0, 143.3, 205.5; IR (ATR) ν: 3058, 2952, 2922, 2850, 1964, 1340, 1157 cm<sup>-1</sup>; HRMS (ESI) *m/z* calcd for C<sub>21</sub>H<sub>25</sub>NNaO<sub>2</sub>S [M+Na]<sup>+</sup> 378.1504, found 378.1510; mp. 66-67 °C.

#### 4-methyl-*N*-phenyl-*N*-(4-phenylbuta-2,3-dien-1-yl)benzenesulfonamide (**1c**)

To a solution of TsNHPH (694 mg, 2.8 mmol) in THF (12 mL) was added PPh<sub>3</sub> (881 mg, 3.4 mmol) and the mixture was cooled to 0 °C. Then DMEAD (azodicarboxylic acid bis(2-methoxyethyl) ester, 787 mg, 3.4 mmol) and a solution of **S3b** in THF (2 mL) was slowly added and the reaction was warmed to room temperature. After stirring 3 h, the solvent was removed under reduced pressure and the residue was filtrated through a pad column and concentrated in vacuo. The crude solid was dissolved in small amount of CH<sub>2</sub>Cl<sub>2</sub>, and then hexane was added to the solution. The precipitation was filtrated

and dried under reduced pressure to afford **1c** as a colorless solid (664 mg, 61%).

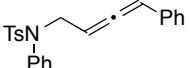 Colorless solid. <sup>1</sup>H NMR (CDCl<sub>3</sub>, 400 MHz) δ: 2.41 (s, 3H), 4.13 (ddd, 1H, *J* = 14.4, 7.6, 2.0 Hz), 4.46 (ddd, 1H, *J* = 14.4, 6.0, 2.8 Hz), 5.52 (ddd, 1H, *J* = 7.6, 7.2, 6.0 Hz), 6.04 (ddd, 1H, *J* = 7.2, 2.8, 2.0 Hz), 6.82-6.85 (m, 2H), 7.07-7.09 (m, 2H), 7.12-7.16 (m, 3H), 7.24 (d, 2H, *J* = 8.0 Hz), 7.29-7.32 (m, 3H), 7.50 (d, 2H, *J* = 8.0 Hz); <sup>13</sup>C NMR (CDCl<sub>3</sub>, 150 MHz) δ: 21.5, 50.3, 91.2, 96.0, 126.8, 127.1, 127.7, 127.9, 128.4, 129.0, 129.1, 129.4, 133.2, 135.3, 138.9, 143.5, 206.5; IR (ATR) ν: 3031, 1951, 1343, 1213 cm<sup>-1</sup>; HRMS (ESI) *m/z* calcd for C<sub>23</sub>H<sub>21</sub>NNaO<sub>2</sub>S [M+Na]<sup>+</sup> 398.1191, found 398.1200; mp. 94-96 °C.

### Scheme S2. Syntheses of **1d-j**<sup>2</sup>

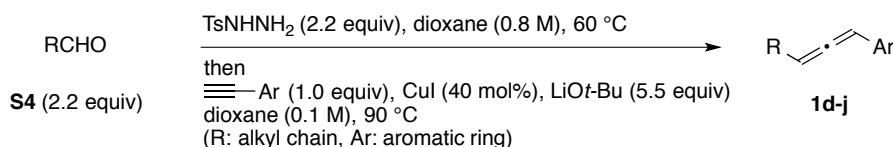

#### deca-1,2-dien-1-ylbenzene (**1d**)

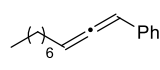 Colorless oil. <sup>1</sup>H NMR (CDCl<sub>3</sub>, 600 MHz) δ: 0.87 (t, 3H, *J* = 7.2 Hz), 1.24-1.31 (m, 6H), 1.33-1.38 (m, 2H), 1.45-1.51 (m, 2H), 2.12 (ddt, 2H, *J* = 6.6, 6.6, 3.6 Hz), 5.56 (dt, 1H, *J* = 6.6, 6.6 Hz), 6.12 (dt, 1H, *J* = 6.6, 3.6 Hz), 7.16-7.20 (m, 1H), 7.29-7.31 (m, 4H); <sup>13</sup>C NMR (CDCl<sub>3</sub>, 100 MHz) δ: 14.1, 22.6, 28.8, 29.1, 29.2, 29.2, 31.8, 94.5, 95.1, 126.55, 126.57, 128.5, 135.2, 205.1; IR (ATR) ν: 2954, 2924, 2853, 1949 cm<sup>-1</sup>; HRMS (APPI) *m/z* calcd for C<sub>26</sub>H<sub>22</sub> [M]<sup>+</sup> 214.1716, found 214.1712. (49%, 127 mg)

#### (4,4-dimethylpenta-1,2-dien-1-yl)benzene (**1e**)

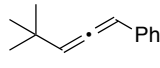 (CAS-Reg# 69248-81-3) Spectral data were identical to the literature data.<sup>2</sup>  
<sup>1</sup>H NMR (CDCl<sub>3</sub>, 400 MHz) δ: 1.13 (s, 9H), 5.57 (d, 1H, *J* = 6.4 Hz), 6.18 (d, 1H, *J* = 6.4 Hz), 7.16-7.21 (m, 1H), 7.29-7.32 (m, 4H). (88%, 181 mg)

#### (3-cyclohexylpropa-1,2-dien-1-yl)benzene (**1f**)

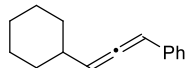 (CAS-Reg# 67647-93-2) Spectral data were identical to the literature data.<sup>2</sup>  
<sup>1</sup>H NMR (CDCl<sub>3</sub>, 400 MHz) δ: 1.15-1.33 (m, 5H), 1.61-1.65 (m, 1H), 1.71-1.76 (m, 2H), 1.82-1.86 (m, 2H), 2.10-2.14 (m, 1H), 5.56 (dd, 1H, *J* = 6.4 Hz), 6.15 (dd, 1H, *J* = 6.4, 3.2 Hz), 7.15-7.19 (m, 1H), 7.29-7.31 (m, 4H). (28%, 96 mg)

### 1-(3-cyclohexylpropa-1,2-dien-1-yl)-4-methoxybenzene (1g)

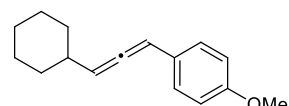

Colorless oil.  $^1\text{H}$  NMR ( $\text{CDCl}_3$ , 400 MHz)  $\delta$ : 1.11-1.35 (m, 5H), 1.61-1.67 (m, 1H), 1.70-1.76 (m, 2H), 1.81-1.86 (m, 2H), 2.06-2.15 (m, 1H), 3.80 (s, 3H), 5.54 (dd, 1H,  $J = 6.4, 6.4$  Hz), 6.12 (dd, 1H,  $J = 6.4, 2.4$  Hz), 6.85 (d, 2H,  $J = 9.2$  Hz), 7.22 (d, 2H,  $J = 9.2$  Hz);  $^{13}\text{C}$  NMR ( $\text{CDCl}_3$ , 150 MHz)  $\delta$ : 26.00, 26.02, 26.1, 33.1, 33.2, 37.7, 55.2, 94.7, 101.0, 114.0, 127.4, 127.5, 158.8, 203.3; IR (ATR)  $\nu$ : 2923, 2850, 1244  $\text{cm}^{-1}$ ; HRMS (APPI)  $m/z$  calcd for  $\text{C}_{16}\text{H}_{20}\text{O}$   $[\text{M}]^+$  228.1509, found 228.1502. (41%, 112 mg)

### 1-(3-cyclohexylpropa-1,2-dien-1-yl)-4-(trifluoromethyl)benzene (1h)

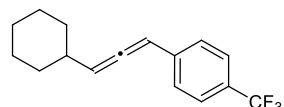

Colorless oil.  $^1\text{H}$  NMR ( $\text{CDCl}_3$ , 400 MHz)  $\delta$ : 1.14-1.26 (m, 3H), 1.27-1.34 (m, 2H), 1.64-1.66 (m, 1H), 1.71-1.76 (m, 2H), 1.83-1.85 (m, 2H), 2.12-2.18 (m, 1H), 5.63 (dd, 1H,  $J = 6.6, 6.6$  Hz), 6.18 (dd, 1H,  $J = 6.6, 3.0$  Hz), 7.37 (d, 2H,  $J = 8.4$  Hz), 7.53 (m, 2H,  $J = 8.4$  Hz);  $^{13}\text{C}$  NMR ( $\text{CDCl}_3$ , 150 MHz)  $\delta$ : 25.99, 26.01, 26.04, 33.07, 33.15, 37.5, 94.7, 101.6, 124.3, (q,  $J = 270$  Hz), 125.5 (q,  $J = 2.7$  Hz), 126.5, 128.4 (q,  $J = 31.7$  Hz), 139.2, 205.1; IR (ATR)  $\nu$ : 2925, 2852, 1947, 1321  $\text{cm}^{-1}$ ; HRMS (APPI)  $m/z$  calcd for  $\text{C}_{16}\text{H}_{17}\text{F}_3$   $[\text{M}]^+$  266.1277, found 266.1277. (69%, 221 mg)

### 1-bromo-4-(3-cyclohexylpropa-1,2-dien-1-yl)benzene (1i)

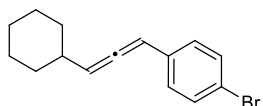

Colorless oil.  $^1\text{H}$  NMR ( $\text{CDCl}_3$ , 400 MHz)  $\delta$ : 1.11-1.36 (m, 5H), 1.63-1.66 (m, 1H), 1.71-1.76 (m, 2H), 1.81-1.84 (m, 2H), 2.08-2.17 (m, 1H), 5.26 (dd, 1H,  $J = 6.4, 6.4$  Hz), 6.09 (dd, 1H,  $J = 6.4, 2.8$  Hz), 7.15 (dt, 1H,  $J = 8.4, 2.0$  Hz), 7.40 (dt, 1H,  $J = 8.4, 2.0$  Hz);  $^{13}\text{C}$  NMR ( $\text{CDCl}_3$ , 100 MHz)  $\delta$ : 25.96, 25.98, 26.0, 33.05, 33.11, 37.5, 94.6, 101.5, 120.1, 127.9, 131.6, 134.3, 204.2; IR (ATR)  $\nu$ : 2922, 2849, 1946, 1487, 829  $\text{cm}^{-1}$ ; HRMS (APPI)  $m/z$  calcd for  $\text{C}_{15}\text{H}_{17}\text{Br}$   $[\text{M}]^+$  276.0508, found 276.0499. (40%, 135 mg)

### 1-methyl-2-(nona-1,2-dien-1-yl)benzene (1j)

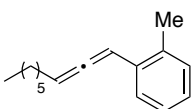

Colorless oil.  $^1\text{H}$  NMR ( $\text{CDCl}_3$ , 400 MHz)  $\delta$ : 0.88 (t, 3H,  $J = 6.8$  Hz), 1.27-1.39 (m, 6H), 1.44-1.50 (m, 2H), 2.12 (ddt, 2H,  $J = 6.8, 6.8, 3.2$  Hz), 2.36 (s, 3H), 5.52 (dt, 1H,  $J = 6.8, 6.8$  Hz), 6.30 (dt, 1H,  $J = 6.8, 3.2$  Hz), 7.06-7.16 (m, 3H), 7.37 (d, 1H,  $J = 7.6$  Hz);  $^{13}\text{C}$  NMR ( $\text{CDCl}_3$ , 100 MHz)  $\delta$ : 14.1, 19.8, 22.6, 28.8, 28.9, 29.2, 31.7, 91.7, 94.2, 126.0, 126.5, 127.0, 130.4, 133.2, 134.7, 205.8; IR (ATR)  $\nu$ : 2955, 2924, 2854, 1946  $\text{cm}^{-1}$ ; HRMS (APPI)  $m/z$  calcd for  $\text{C}_{16}\text{H}_{23}$   $[\text{M}+\text{H}]^+$  215.1794, found 215.1791. (39%, 100 mg)

### Scheme S3. Synthesis of 1k<sup>3</sup>

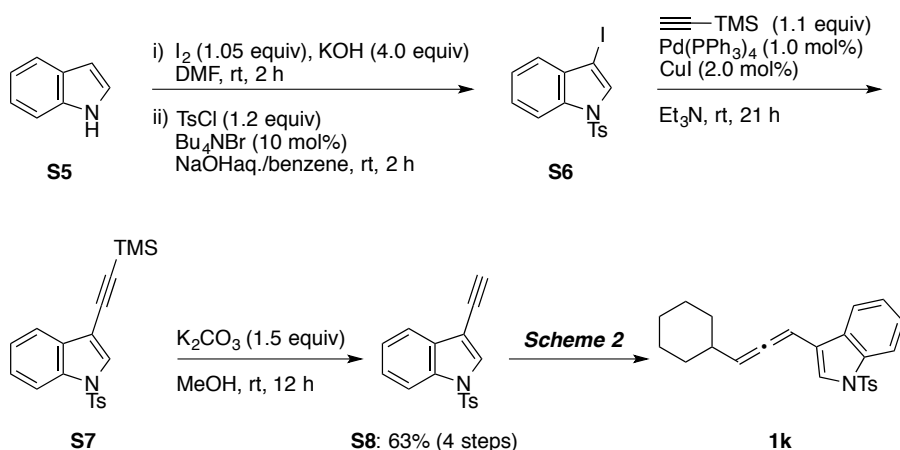

### 3-(3-cyclohexylpropa-1,2-dien-1-yl)-1-tosyl-1H-indole (1k)

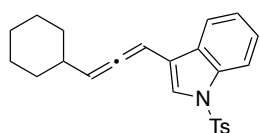

Yellow amorphous. <sup>1</sup>H NMR (CDCl<sub>3</sub>, 400 MHz) δ: 1.16-1.28 (m, 5H), 1.62-1.65 (m, 1H), 1.71-1.76 (m, 2H), 1.81-1.89 (m, 2H), 2.11-2.18 (m, 1H), 2.34 (s, 3H), 5.57 (dd, 1H, *J* = 6.0, 6.0 Hz), 6.32 (dd, 1H, *J* = 6.0, 3.2 Hz), 7.20-7.24 (m, 3H), 7.32 (dd, 1H, *J* = 8.0 Hz), 7.46 (s, 1H), 7.76 (d, 2H, *J* = 8.4 Hz), 7.89 (d, 1H, *J* = 8.0 Hz), 7.97 (d, 1H, *J* = 8.0 Hz); <sup>13</sup>C NMR (CDCl<sub>3</sub>, 100 MHz) δ: 21.6, 26.0, 26.0, 26.1, 32.77, 32.83, 37.7, 86.3, 100.3, 113.6, 116.7, 120.8, 123.1, 123.3, 124.9, 126.8, 129.3, 129.9, 135.1, 135.6, 144.9, 205.2; IR (ATR) ν: 2923, 2850, 1957, 1371, 1172 cm<sup>-1</sup>; HRMS (ESI) *m/z* calcd for C<sub>24</sub>H<sub>26</sub>NO<sub>2</sub>S [M+H]<sup>+</sup> 392.1684, found 392.1696. (69%, 150 mg)

### Scheme S4. Hydrocyanation of 1b

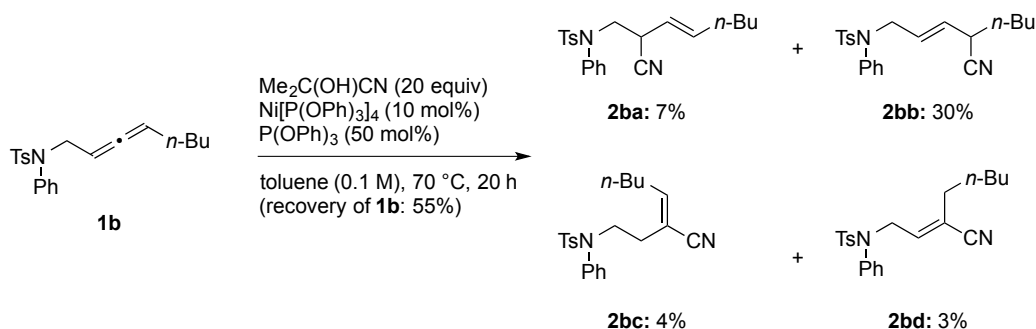

*(E)*-*N*-(2-cyano-oct-3-en-1-yl)-4-methyl-*N*-phenylbenzenesulfonamide (**2ba**)

*(E)*-*N*-(4-cyano-oct-2-en-1-yl)-4-methyl-*N*-phenylbenzenesulfonamide (**2bb**)

*(E)*-*N*-(3-cyano-oct-3-en-1-yl)-4-methyl-*N*-phenylbenzenesulfonamide (**2bc**)

*(E)*-*N*-(3-cyano-oct-2-en-1-yl)-4-methyl-*N*-phenylbenzenesulfonamide (**2bd**)

Above products were obtained as an inseparable mixture.

(**2ba**:**2bb**:**2bc**:**2bd**=0.24:1.00:0.12:0.084). The yields were estimated by <sup>1</sup>H NMR.

$^1\text{H}$  NMR ( $\text{CDCl}_3$ , 400 MHz)  $\delta$ : 0.82-0.92 (m, (1.0 + 0.24 + 0.12 + 0.084) x 3H), 1.15-1.41 (m, (1.0 + 0.24 + 0.12 + 0.084) x 4H), 1.44-1.51 (m, (1.0 + 0.084) x 2H), 2.02-2.08 (m, (0.24 + 0.084) x 2H), 2.13 (dt, 0.12 x 2H,  $J = 7.2, 7.2$  Hz), 2.43-2.48 (m, 0.12 x 2H), 2.43 (s, (1.0 + 0.24 + 0.12 + 0.084) x 3H), 3.11 (dt, 1.0 x 1H,  $J = 6.4, 6.4$  Hz), 3.47 (dt, 0.24 x 1H,  $J = 8.0, 6.8$  Hz), 3.68 (t, 0.12 x 2H,  $J = 7.2$  Hz), 3.72 (dd, 0.24 x 2H,  $J = 13.6, 8.0$  Hz), 3.77 (dd, 0.24 x 2H,  $J = 13.6, 8.0$  Hz), 4.16 (dd, 1.0 x 1H,  $J = 14.8, 6.8$  Hz), 4.21 (dd, 1.0 x 1H,  $J = 14.8, 6.4$  Hz), 4.30 (d, 0.084 x 2H,  $J = 6.4$  Hz), 5.31 (dd, 0.24 x 1H,  $J = 15.2, 6.8$  Hz), 5.39 (dd, 1.0 x 1H,  $J = 15.2, 6.4$  Hz), 5.73 (dddd, 1.0 x 1H,  $J = 15.2, 6.8, 6.4, 1.2$  Hz), 5.84 (dt, 0.24 x 1H,  $J = 15.2, 6.8$  Hz), 6.24 (t, 0.084 x 1H,  $J = 6.4$  Hz), 6.39 (t, 0.12 x 1H,  $J = 7.2$  Hz), 7.00-7.13 (m, (1.0 + 0.24 + 0.12 + 0.084) x 2H), 7.19-7.37 (m, (1.0 + 0.24 + 0.12 + 0.084) x 5H), 7.35-7.52 (m, (1.0 + 0.24 + 0.12 + 0.084) x 2H)

### Scheme S5. Hydrocyanation of 1c

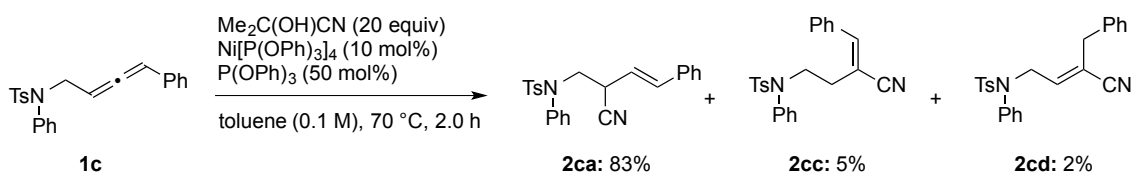

### (*E*)-*N*-(2-cyano-4-phenylbut-3-en-1-yl)-4-methyl-*N*-phenylbenzenesulfonamide (**2ca**)

**2ca** was obtained together with **2cc** and **2cd**. The yield was estimated by  $^1\text{H}$  NMR. Then **2ca** was partially separated by recrystallization from hexane/ $\text{CH}_2\text{Cl}_2$ .

**2ca** Colorless solid.  $^1\text{H}$  NMR ( $\text{CDCl}_3$ , 400 MHz)  $\delta$ : 2.43 (s, 3H), 3.73 (dt, 1H,  $J = 8.0, 7.2$  Hz), 3.85 (dd, 1H,  $J = 13.6, 7.2$  Hz), 3.89 (dd, 1H,  $J = 13.6, 8.0$  Hz), 6.03 (dd, 1H,  $J = 16.0, 7.2$  Hz), 6.74 (dd, 16.0, 1.2 Hz), 7.06-7.09 (m, 2H), 7.25 (d, 2H,  $J = 8.0$  Hz), 7.29-7.34 (m, 8H), 7.47 (d, 2H,  $J = 8.0$  Hz);  $^{13}\text{C}$  NMR ( $\text{CDCl}_3$ , 100 MHz)  $\delta$ : 21.6, 35.2, 53.1, 118.1, 119.5, 126.7, 127.8, 128.6, 128.68, 128.72, 129.1, 129.4, 129.6, 134.6, 135.3, 135.5, 139.0, 144.1; IR (ATR)  $\nu$ : 3057, 2246, 1350, 1161  $\text{cm}^{-1}$ ; HRMS (ESI)  $m/z$  calcd for  $\text{C}_{24}\text{H}_{22}\text{N}_2\text{NaO}_2\text{S}$  [ $\text{M}+\text{Na}$ ] $^+$  425.1300, found 425.1311; mp. 108-110 °C. (91%, 58 mg)

### Scheme S6. Hydrocyanation of 1d-k

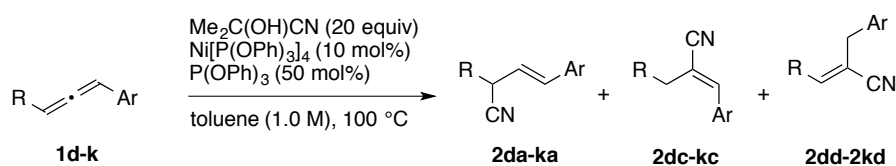

### (*E*)-2-styryloctanenitrile (2da)

This reaction was performed with 0.24 mmol of **1d** and **2da** was obtained as inseparable mixture with **2dc** (8%) and **2dd** (3%). The yield was estimated by <sup>1</sup>H NMR.

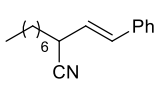 Colorless oil. <sup>1</sup>H NMR (CDCl<sub>3</sub>, 600 MHz) δ: 0.88 (t, 3H, *J* = 6.6 Hz), 1.21-1.38 (m, 8H), 1.43-1.58 (m, 2H), 1.75-1.79 (m, 2H), 3.42 (dt, 1H, *J* = 7.2, 7.2 Hz), 6.04 (dd, 1H, *J* = 16.2, 6.6 Hz), 6.72 (d, 1H, *J* = 16.2 Hz), 7.27-7.29 (m, 1H), 7.34 (dd, 2H, *J* = 7.2, 7.2 Hz), 7.37-7.39 (m, 2H); <sup>13</sup>C NMR (CDCl<sub>3</sub>, 150 MHz) δ: 14.1, 22.6, 26.8, 29.0, 29.0, 31.7, 33.3, 34.4, 120.2, 123.3, 126.5, 128.2, 128.7, 133.1, 135.8; IR (ATR) ν: 2925, 2856, 2240, 1449 cm<sup>-1</sup>; HRMS (APPI) *m/z* calcd for C<sub>17</sub>H<sub>23</sub>N [M]<sup>+</sup> 241.1825, found 241.1820. (69%, 40.2 mg)

### (*E*)-2-(*tert*-butyl)-4-phenylbut-3-enitrile (2ea)

This reaction was performed with 0.24 mmol of **1e** using sealed tube and **2ea** was obtained together with **2ed** (6%). These yields were calculated by <sup>1</sup>H NMR. Then **2ea** was partially separated by recrystallization from *n*-pentane.

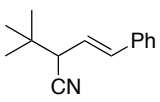 Colorless solid. <sup>1</sup>H NMR (CDCl<sub>3</sub>, 400 MHz) δ: 1.12 (s, 9H, *J* = 7.2, 0.8 Hz), 3.18 (dd, 1H, *J* = 15.6, 7.6 Hz), 6.12 (dd, 1H, *J* = 15.6 Hz), 6.71 (d, 1H, *J* = 15.6 Hz), 7.26-7.30 (m, 1H), 7.35 (dd, 2H, *J* = 7.2 Hz), 7.39-7.40 (m, 2H); <sup>13</sup>C NMR (CDCl<sub>3</sub>, 150 MHz) δ: 27.3, 34.7, 46.7, 119.4, 120.7, 126.5, 128.2, 128.7, 130.0, 135.8; IR (ATR) ν: 2962, 2867, 2232 cm<sup>-1</sup>; HRMS (ESI) *m/z* calcd for C<sub>14</sub>H<sub>19</sub>NNa [M+Na]<sup>+</sup> 222.1253, found 222.1251; mp. 56 °C. (79%, 37.8 mg)

### (*E*)-2-cyclohexyl-4-phenylbut-3-enitrile (2fa)

This reaction was performed with 0.24 mmol of **1f** and **2fa** was obtained together with **2fc** (6%) and **2fd** (5%). These yields were estimated by <sup>1</sup>H NMR. Then **2fa** was partially purified by recrystallization from *n*-hexane.

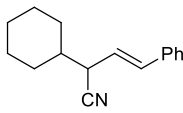 Colorless solid. <sup>1</sup>H NMR (CDCl<sub>3</sub>, 600 MHz) δ: 1.15-1.31 (m, 5H), 1.65-1.70 (m, 2H), 1.79-1.85 (m, 3H), 1.89-1.91 (m, 1H), 3.30 (dd, 1H, *J* = 6.0, 6.0 Hz), 6.40 (dd, 1H, *J* = 15.6, 6.6 Hz), 6.70 (d, 1H, *J* = 15.6 Hz), 7.26-7.29 (m, 1H), 7.34 (dd, 2H, *J* = 7.2, 7.2 Hz), 7.38-7.39 (m, 2H); <sup>13</sup>C NMR (CDCl<sub>3</sub>, 150 MHz) δ: 25.8, 25.8, 25.9, 29.4, 31.0, 40.9, 41.1, 119.3, 122.1, 126.5, 128.1, 128.7, 133.9, 135.8; IR (ATR) ν: 2923, 2854, 2233, 1449 cm<sup>-1</sup>; HRMS (APPI) *m/z* calcd for C<sub>16</sub>H<sub>19</sub>N [M]<sup>+</sup> 225.1512, found 225.1507; mp. 77-78 °C. (74%, 40.1 mg)

### (*E*)-2-cyclohexyl-4-(4-methoxyphenyl)but-3-enitrile (2ga)

This reaction was performed with 0.29 mmol of **1g** and **2ga** was obtained together with **2gc** (5%) and **2gd** (6%). The yield was estimated by <sup>1</sup>H NMR. Then **2ga** was partially separated by recrystallization from *n*-pentane.

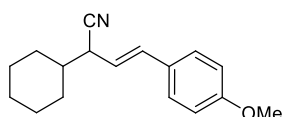

Colorless solid.  $^1\text{H}$  NMR ( $\text{CDCl}_3$ , 400 MHz)  $\delta$ : 1.15-1.29 (m, 5H), 1.63-1.70 (m, 2H), 1.78-1.84 (m, 3H), 1.89-1.91 (m, 1H), 3.27 (dd, 1H,  $J = 6.0, 6.0$  Hz), 3.82 (s, 3H), 5.90 (dd, 1H,  $J = 15.6, 7.2$  Hz), 6.63 (d, 1H,  $J = 15.6$  Hz), 6.87 (d, 2H,  $J = 9.0$  Hz), 7.31 (d, 2H,  $J = 9.0$  Hz);  $^{13}\text{C}$  NMR ( $\text{CDCl}_3$ , 150 MHz)  $\delta$ : 25.9, 26.0, 29.6, 31.0, 40.9, 41.2, 55.3, 114.1, 119.6, 119.8, 127.7, 128.6, 133.3, 159.6; IR (ATR)  $\nu$ : 2954, 2929, 2853, 2234  $\text{cm}^{-1}$ ; HRMS (APPI)  $m/z$  calcd for  $\text{C}_{17}\text{H}_{21}\text{NO}$   $[\text{M}]^+$  255.1618, found 255.1608; mp. 60-61  $^\circ\text{C}$ . (77%, 57.4 mg)

#### (*E*)-2-cyclohexyl-4-(4-(trifluoromethyl)phenyl)but-3-enitrile (2ha)

This reaction was performed with 0.24 mmol of **1h** and **2ha** was obtained together with **2hc** (6%) and **2hd** (4%). The yield was estimated by  $^1\text{H}$  NMR. Then **2ha** was partially separated by recrystallization from *n*-pentane.

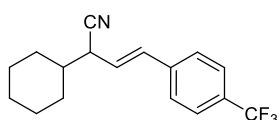

Colorless solid.  $^1\text{H}$  NMR ( $\text{CDCl}_3$ , 400 MHz)  $\delta$ : 1.15-1.34 (m, 5H), 1.70-1.72 (m, 2H), 1.80-1.90 (m, 4H), 3.35 (dd, 1H,  $J = 6.0, 6.0$  Hz), 6.15 (dd, 1H,  $J = 15.6, 9.6$  Hz), 6.75 (d, 1H,  $J = 15.6$  Hz), 7.48 (d, 2H,  $J = 8.0$  Hz), 7.59 (d, 2H,  $J = 8.0$  Hz);  $^{13}\text{C}$  NMR ( $\text{CDCl}_3$ , 150 MHz)  $\delta$ : 25.77, 25.79, 25.9, 29.5, 31.0, 40.8, 41.1, 118.9, 124.0 (q,  $J = 270$  Hz), 124.9, 125.6 (q,  $J = 3.9$  Hz), 126.7, 130.0 (q,  $J = 18$  Hz), 132.6, 139.2; IR (ATR)  $\nu$ : 2925, 2855, 2243  $\text{cm}^{-1}$ ; HRMS (APPI)  $m/z$  calcd for  $\text{C}_{17}\text{H}_{18}\text{F}_3\text{N}$   $[\text{M}]^+$  293.1386, found 293.1376; mp. 60-61  $^\circ\text{C}$ . (76%, 53.6 mg)

#### (*E*)-4-(4-bromophenyl)-2-cyclohexylbut-3-enitrile (2ia)

This reaction was performed with 0.34 mmol of **1i** and **2ia** was obtained together with **2ic** (6%) and **2id** (4%). The yield was estimated by  $^1\text{H}$  NMR. Then **2ia** was partially separated by recrystallization from pentane.

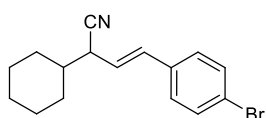

Colorless solid.  $^1\text{H}$  NMR ( $\text{CDCl}_3$ , 600 MHz)  $\delta$ : 1.15-1.31 (m, 5H), 1.66-1.71 (m, 2H), 1.79-1.84 (m, 3H), 1.88-1.90 (m, 1H), 3.30 (ddd, 1H,  $J = 6.0, 6.0, 1.2$  Hz), 6.04 (dd, 1H,  $J = 16.2, 6.0$  Hz), 6.65 (d, 1H,  $J = 16.2$  Hz), 7.25 (d, 2H,  $J = 8.4$  Hz), 7.46 (d, 2H,  $J = 8.4$  Hz);  $^{13}\text{C}$  NMR ( $\text{CDCl}_3$ , 100 MHz)  $\delta$ : 25.8, 25.8, 25.9, 29.6, 31.0, 40.8, 41.1, 119.1, 122.0, 122.9, 128.0, 131.8, 132.7, 134.7; IR (ATR)  $\nu$ : 2929, 2854, 2234  $\text{cm}^{-1}$ ; HRMS (ESI)  $m/z$  calcd for  $\text{C}_{16}\text{H}_{17}\text{BrNNa}$   $[\text{M}+\text{Na}]^+$  326.0515, found 326.0506; mp. 80-82  $^\circ\text{C}$ . (75%, 77.8 mg)

#### (*E*)-2-(2-methylstyryl)octanenitrile (2ja)

This reaction was performed with 0.20 mmol of **1j** and **2ja** was obtained as inseparable mixture with **2jc** (8%) and **2jd** (4%). The yield was estimated by  $^1\text{H}$  NMR. Then **2ja** was partially separated by column chromatography.



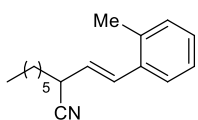

Colorless oil.  $^1\text{H}$  NMR ( $\text{CDCl}_3$ , 600 MHz)  $\delta$ : 0.89 (t, 3H,  $J = 7.2$  Hz), 1.24-1.39 (m, 6H), 1.43-1.61 (m, 2H), 1.75-1.81 (m, 2H), 2.36 (s, 3H), 3.44 (dt, 1H,  $J = 7.6, 6.8$  Hz), 5.91 (dd, 1H,  $J = 16.0, 6.8$  Hz), 6.93 (d, 1H,  $J = 16.0$  Hz), 7.15-7.20 (m, 3H), 7.37-7.39 (m, 1H);  $^{13}\text{C}$  NMR ( $\text{CDCl}_3$ , 100 MHz)  $\delta$ : 14.0, 19.7, 22.5, 26.7, 26.7, 31.5, 33.3, 34.6, 120.3, 124.7, 125.7, 126.1, 128.1, 130.4, 131.1, 135.0, 135.7; IR (ATR)  $\nu$ : 2926, 2858, 2239  $\text{cm}^{-1}$ ; HRMS (APPI)  $m/z$  calcd for  $\text{C}_{17}\text{H}_{23}\text{N}$   $[\text{M}]^+ + 241.1825$ , found 241.1822. (78%, 36.9 mg)

### (*E*)-2-cyclohexyl-4-(1-tosyl-1*H*-indol-3-yl)but-3-enitrile (**2ka**)

This reaction was performed with 0.29 mmol of **1k** and **2ka** was obtained together with **2kc** (8%) and **2kd** (5%). The yield was estimated by  $^1\text{H}$  NMR. Then **2ka** was partially separated by column chromatography.

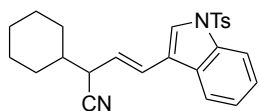

Colorless amorphous.  $^1\text{H}$  NMR ( $\text{CDCl}_3$ , 400 MHz)  $\delta$ : 1.15-1.33 (m, 5H), 1.64-1.93 (m, 6H), 2.34 (s, 3H), 3.33 (dd, 1H,  $J = 6.0, 6.8$  Hz), 6.11 (dd, 1H,  $J = 16.0, 6.8$  Hz), 6.28 (d, 1H,  $J = 16.0$  Hz), 7.20-7.25 (m, 3H), 7.27-7.31 (m, 1H), 7.62 (s, 1H), 7.68 (d, 1H,  $J = 7.2$  Hz), 7.78 (d, 2H, 8.4 Hz), 8.00 (d, 2H,  $J = 8.0$  Hz);  $^{13}\text{C}$  NMR ( $\text{CDCl}_3$ , 150 MHz)  $\delta$ : 21.5, 25.8, 25.8, 25.9, 29.6, 31.0, 40.8, 41.5, 113.8, 119.0, 119.2, 120.1, 123.2, 123.6, 124.4, 124.6, 125.1, 126.8, 128.6, 129.9, 134.9, 135.4, 145.2; IR (ATR)  $\nu$ : 2026, 2853, 2238, 1370, 1172  $\text{cm}^{-1}$ ; HRMS (ESI)  $m/z$  calcd for  $\text{C}_{25}\text{H}_{27}\text{N}_2\text{O}_2\text{S}$   $[\text{M}+\text{H}]^+ 419.1793$ , found 419.1796. (78%, 95.4 mg)

### References

- 1) a) Y. Imada, M. Nishida, K. Kutsuwa, S. Murahashi, T. Naota, *Org. Lett.* **2005**, *7*, 5837.  
b) G. E. Keck, R. R. Webb, *Tetrahedron Lett.*, **1982**, *23*, 3051.
- 2) M. L. Hosain, F. Ye, Y. Zhang, J. Wang, *J. Org. Chem.*, **2013**, *78*, 1236.
- 3) K. Tanaka, T. Kobayashi, H. Mori, S. Katsumura, *J. Org. Chem.*, **2004**, *69*, 5906.

**Scheme S7. Synthesis of cyclopropylallenes (3a-j, l) <sup>4</sup>**

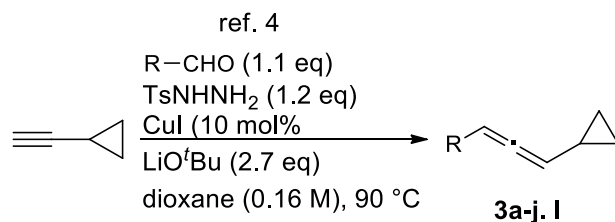

**(3-cyclopropylpropa-1,2-dien-1-yl)benzene (3a)** (CAS-Reg#

200417-79-4)

(37%, 1.84 g)

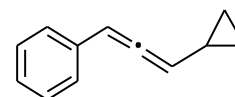

**1-(3-cyclopropylpropa-1,2-dien-1-yl)-4-methoxybenzene (3b)**

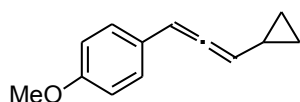

<sup>1</sup>H-NMR (CDCl<sub>3</sub>, 400 MHz)  $\delta$ : 0.40-0.50 (m, 2H), 0.69-0.79 (m, 2H), 1.30-1.38 (m, 1H), 3.80 (s, 3H), 5.41 (dd, 1H,  $J = 6.8, 6.8$  Hz), 6.16 (d, 1H,  $J = 6.8$  Hz), 6.84 (d, 2H,  $J = 8.8$  Hz), 7.20 (d, 2H,  $J = 8.8$  Hz); <sup>13</sup>C-NMR (CDCl<sub>3</sub>, 100 MHz)  $\delta$ : 6.8, 7.0, 9.6, 55.3, 95.6, 99.4, 114.1, 127.2, 127.7, 158.7, 204.0; IR (ATR)  $\nu$ : 2928, 1717, 1599, 1510, 1253, 1161, 1023 cm<sup>-1</sup>; HRMS (APPI) Calcd for C<sub>13</sub>H<sub>15</sub>O, [M+H]<sup>+</sup> 187.1117, found 187.1117; yellow oil (25%, 250 mg)

**1-(3-cyclopropylpropa-1,2-dien-1-yl)-4-(trifluoromethyl)benzene (3c)**

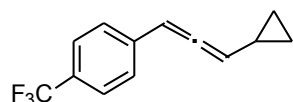

<sup>1</sup>H-NMR (CDCl<sub>3</sub>, 400 MHz)  $\delta$ : 0.42-0.52 (m, 2H), 0.78 (dd, 2H,  $J = 8.4, 2.4$  Hz), 1.33-1.41 (m, 1H), 5.50 (dd, 1H,  $J = 6.4, 6.4$  Hz), 6.22 (d, 2H,  $J = 6.4$  Hz), 7.37 (d, 2H,  $J = 8.0$  Hz), 7.53 (d, 2H,  $J = 8.0$  Hz); <sup>13</sup>C-NMR (CDCl<sub>3</sub>, 100 MHz)  $\delta$ : 7.0, 7.0, 9.2, 95.4, 100.2, 125.5, 126.7, 128.5, 138.9, 205.9; IR (ATR)  $\nu$ : 3007, 1948, 1615, 1321, 1119, 1106, 1065, 844 cm<sup>-1</sup>; HRMS (APPI) Calcd for C<sub>13</sub>H<sub>11</sub>F<sub>3</sub>, [M]<sup>+</sup> 224.0807, found 224.0803; Yellow oil (23%, 225 mg)

**1-(*tert*-butyl)-4-(3-cyclopropylpropa-1,2-dien-1-yl)benzene (3d)**

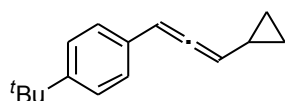

<sup>1</sup>H-NMR (CDCl<sub>3</sub>, 400 MHz)  $\delta$ : 0.42-0.44 (m, 2H), 0.70-0.74 (m, 2H), 1.29-1.30 (m, 10H), 5.42 (dd, 1H,  $J = 6.4, 6.4$  Hz), 6.17 (d, 1H,  $J = 6.4$  Hz), 7.21 (d, 2H,  $J = 8.4$  Hz), 7.30 (d, 2H,  $J = 8.4$  Hz); <sup>13</sup>C-NMR (CDCl<sub>3</sub>, 100 MHz)  $\delta$ : 6.8, 7.1, 31.3, 34.5, 95.9, 99.2, 125.5, 126.3, 131.9, 149.8, 204.6; IR (ATR)  $\nu$ : 2961, 1947, 1514, 1268, 1018, 875, 836 cm<sup>-1</sup>; HRMS (APPI) Calcd for C<sub>16</sub>H<sub>20</sub>, [M]<sup>+</sup> 212.1560, found 212.1556; Yellow oil (23%, 228.9 mg)

**1-bromo-2-(3-cyclopropylpropa-1,2-dien-1-yl)benzene (3e)**

<sup>1</sup>H-NMR (CDCl<sub>3</sub>, 400 MHz)  $\delta$ : 0.39-0.50 (m, 2H), 0.69-0.82 (m, 2H), 1.31-1.39 (m, 1H),

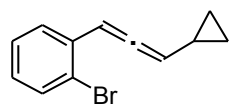

5.45 (dd, 1H,  $J = 6.8, 6.8$  Hz), 6.64 (d, 1H,  $J = 6.8$  Hz), 7.00 (dd, 1H,  $J = 7.6, 7.6$  Hz), 7.21 (dd, 1H,  $J = 7.6, 7.6$  Hz), 7.42 (d, 1H,  $J = 7.6$  Hz), 7.48 (d, 1H,  $J = 7.6$  Hz);  $^{13}\text{C}$ -NMR ( $\text{CDCl}_3$ , 100 MHz)  $\delta$ : 6.9, 7.0, 9.3, 95.2, 99.7, 122.4, 127.3, 128.0, 128.2, 132.9, 134.2, 205.9; IR (ATR)  $\nu$ : 3003, 1947, 1473, 1019, 740  $\text{cm}^{-1}$ ; HRMS (APPI) Calcd for  $\text{C}_{12}\text{H}_{11}\text{Br}$ ,  $[\text{M}]^+ 234.0039$ , found 234.0036; Yellow oil (11%, 108.4 mg)

### 1-bromo-3-(3-cyclopropylpropa-1,2-dien-1-yl)benzene (3f)

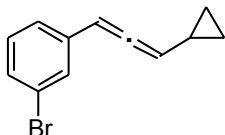

$^1\text{H}$ -NMR ( $\text{CDCl}_3$ , 400 MHz)  $\delta$ : 0.36-0.49 (m, 2H), 0.70-0.80 (m, 2H), 1.30-1.36 (m, 1H), 5.43 (dd, 1H,  $J = 6.4, 6.4$  Hz), 6.10 (d, 1H,  $J = 6.4$  Hz), 7.09-7.17 (m, 2H), 7.26 (d, 1H,  $J = 7.6$  Hz), 7.41 (s, 1H);  $^{13}\text{C}$ -NMR ( $\text{CDCl}_3$ , 100 MHz)  $\delta$ : 7.0, 9.4, 95.1, 100.0, 122.7, 125.2, 129.3, 129.6, 129.9, 137.2, 205.1; IR (ATR)  $\nu$ : 3080, 3003, 1947, 1588, 1564, 1474, 883, 784, 679  $\text{cm}^{-1}$ ; HRMS (APPI) Calcd for  $\text{C}_{12}\text{H}_{11}\text{Br}$ ,  $[\text{M}]^+ 234.0039$ , found 234.0036; Yellow oil (20%, 201.2 mg)

### 1-bromo-4-(3-cyclopropylpropa-1,2-dien-1-yl)benzene (3g)

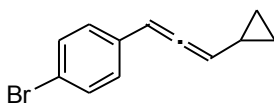

$^1\text{H}$ -NMR ( $\text{CDCl}_3$ , 400 MHz)  $\delta$ : 0.38-0.50 (m, 2H), 0.72-0.81 (m, 2H), 1.30-1.39 (m, 1H), 5.43 (dd, 1H,  $J = 6.8, 6.8$  Hz), 6.13 (d, 1H,  $J = 6.8$  Hz), 7.14 (d, 2H,  $J = 8.4$  Hz), 7.40 (d, 2H,  $J = 8.4$  Hz);  $^{13}\text{C}$ -NMR ( $\text{CDCl}_3$ , 100 MHz)  $\delta$ : 7.0, 7.1, 9.3, 95.3, 99.9, 120.3, 128.1, 131.5, 133.9, 204.9; IR (ATR)  $\nu$ : 3079, 3003, 1946, 1487, 1068, 1009, 828  $\text{cm}^{-1}$ ; HRMS (APPI) Calcd for  $\text{C}_{12}\text{H}_{12}\text{Br}$ ,  $[\text{M}+\text{H}]^+ 235.0117$ , found 235.0111; Yellow oil (41%, 823.6 mg)

### 2-(3-cyclopropylpropa-1,2-dien-1-yl)naphthalene (3h)

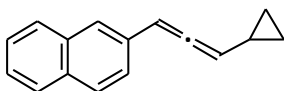

$^1\text{H}$ -NMR ( $\text{CDCl}_3$ , 400 MHz)  $\delta$ : 0.45-0.53 (m, 2H), 0.72-0.81 (m, 2H), 1.36-1.43 (m, 1H), 5.51 (dd, 1H,  $J = 6.8, 6.8$  Hz), 6.38 (d, 1H,  $J = 6.8$  Hz), 7.40-7.50 (m, 3H), 7.65 (s, 1H), 7.75-7.80 (m, 3H);  $^{13}\text{C}$ -NMR ( $\text{CDCl}_3$ , 100 MHz)  $\delta$ : 6.9, 7.1, 9.5, 96.6, 99.7, 124.6, 125.4, 125.5, 126.1, 127.6, 127.7, 128.1, 132.4, 132.6, 133.7, 205.4; IR (ATR)  $\nu$ : 3054, 3003, 1944, 1629, 1597, 1508, 1248  $\text{cm}^{-1}$ ; HRMS (APPI) Calcd for  $\text{C}_{16}\text{H}_{14}$ ,  $[\text{M}]^+ 206.1090$ , found 206.1085; Colorless solid (mp: 45-48  $^\circ\text{C}$ , 27%, 269 mg)

### 2-(3-cyclopropylpropa-1,2-dien-1-yl)thiophene (3i)

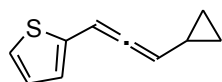

$^1\text{H}$ -NMR ( $\text{CDCl}_3$ , 400 MHz)  $\delta$ : 0.43-0.51 (m, 2H), 0.74-0.78 (m, 2H), 1.30-1.38 (m, 1H), 5.47 (dd, 1H,  $J = 6.4, 6.4$  Hz), 6.41 (d, 1H,  $J = 6.4$  Hz), 6.89 (d, 1H,  $J = 3.6$  Hz), 6.94 (dd, 1H,  $J = 4.8, 3.6$  Hz), 7.13 (d, 1H,  $J = 4.8$  Hz);  $^{13}\text{C}$ -NMR ( $\text{CDCl}_3$ , 100 MHz)  $\delta$ : 6.8, 7.4, 9.5, 90.6, 99.9, 124.2, 124.4,

127.4, 139.5, 204.0; IR (ATR)  $\nu$ : 3079, 3002, 1653, 1428, 1256  $\text{cm}^{-1}$ ; HRMS (APPI) Calcd for  $\text{C}_{10}\text{H}_{10}\text{S}$ ,  $[\text{M}]^+ 162.0498$ , found 162.0494; Yellow oil (14%, 143.4 mg)

### Scheme S8. Synthesis of **3j**<sup>1, 2, 3, 4</sup>

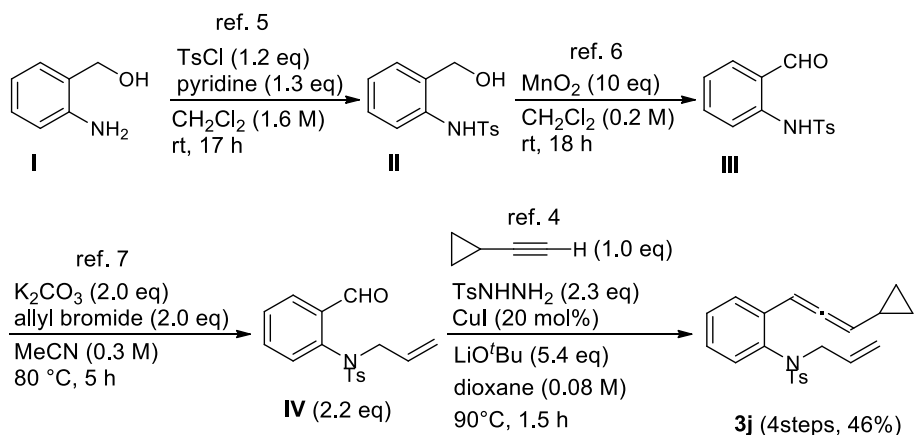

### N-allyl-N-(2-(3-cyclopropylpropa-1,2-dien-1-yl)phenyl)-4-methylbenzenesulfonamide (**3j**)

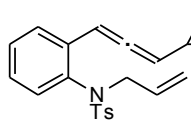

<sup>1</sup>H-NMR ( $\text{CDCl}_3$ , 400 MHz)  $\delta$ : 0.42-0.75 (m, 4H), 1.25-1.34 (m, 1H), 2.44 (s, 3H), 3.89-4.02 (m, 1H), 4.21-4.41 (m, 1H), 4.99 (d, 2H,  $J = 10.4$  Hz), 5.42 (dd, 1H,  $J = 6.8, 6.8$  Hz), 5.68-5.82 (m, 1H), 6.50-6.70 (m, 2H), 7.00-7.11 (m, 1H), 7.21-7.31 (m, 3H), 7.49-7.67 (m, 3H); <sup>13</sup>C-NMR ( $\text{CDCl}_3$ , 100 MHz)  $\delta$ : 7.2, 7.4, 8.4, 9.6, 9.7, 21.9, 55.2, 73.1, 86.1, 92.5, 99.7, 119.6, 120.0, 127.2, 127.2, 128.2, 128.4, 128.8, 129.0, 129.3, 129.6, 129.9, 130.1, 132.5, 132.8, 135.8, 136.2, 136.3, 137.4, 139.7, 143.9, 144.0, 206.0; IR (ATR)  $\nu$ : 3429, 3067, 3012, 2250, 1944, 1697, 1597, 1490, 1343, 1161, 1090  $\text{cm}^{-1}$ ; HRMS (ESI) Calcd for  $\text{C}_{22}\text{H}_{23}\text{NNaO}_2\text{S}$ ,  $[\text{M}+\text{Na}]^+ 388.1347$ , found 388.1348; Yellow oil (2.12 g)

### Scheme S9. Synthesis of **3k**<sup>8</sup>

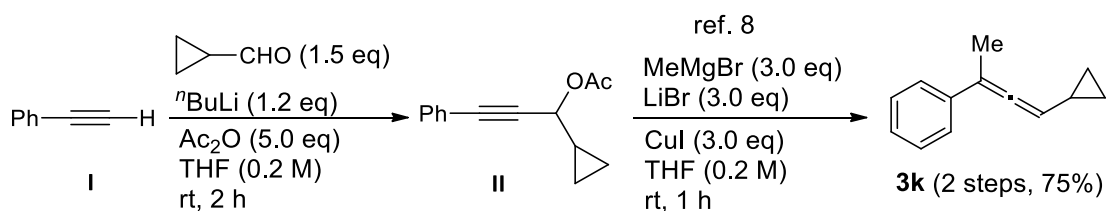

**I to II** : To a THF (23.4 mL) solution of ethynylbenzene (0.51 mL 4.7 mmol) was added n-buthyllithium (3.6 ml, 1.55 M in THF, 5.6 mmol) at  $-78$  °C under argon. The resulting solution was allowed to stir for an additional 30 min at same temperature. To this solution was added cyclopropanecarboxaldehyde (0.2 mL, 7.0 mmol) at  $-78$  °C. The mixture was stirred for an additional 30 min, then warmed to  $0$  °C over 2 h. After acetic anhydride (2.2 mL, 23.4 mmol) was added, the mixture was allowed to be stirred

for 1 h at 0 °C. The reaction was quenched with saturated aqueous ammonium chloride, and the mixture was extracted with AcOEt. The combined organic layers were washed with brine and dried over anhydrous sodium sulfate. After removal of the solvent under reduced pressure, the residue (1.24 g) was used directly in the next step without further purification.

**(4-cyclopropylbuta-2,3-dien-2-yl)benzene (3k)**

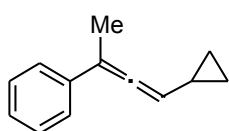

<sup>1</sup>H-NMR (CDCl<sub>3</sub>, 400 MHz) δ: 0.39-0.43 (m, 2H), 0.69-0.73 (m, 2H), 1.27-1.36 (m, 1H), 2.08 (dd, 3H, *J* = 2.8, 0.8 Hz), 5.29 (dd, 1H, *J* = 6.8, 2.8 Hz), 7.17 (dd, 1H, *J* = 8.4, 8.4 Hz), 7.30 (dd, 2H, *J* = 8.4, 8.4 Hz), 7.39 (dd, 2H, *J* = 8.4, 8.4 Hz); <sup>13</sup>C-NMR (CDCl<sub>3</sub>, 100 MHz) δ: 6.9, 6.9, 9.7, 17.3, 97.4, 102.0, 125.6, 126.4, 128.2, 137.5, 203.6; IR (ATR) ν: 3734, 3669, 3081, 3003, 1943, 1597, 1492, 1442, 1370, 1258 cm<sup>-1</sup>; HRMS (APPI) Calcd for C<sub>13</sub>H<sub>14</sub>, [M]<sup>+</sup> 170.1090, found 170.1088; Yellow oil (597.5 mg)

**(3-cyclopropylpropa-1,2-dien-1-yl)cyclohexane (3l)**

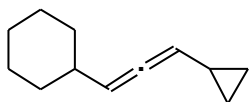

<sup>1</sup>H-NMR (CDCl<sub>3</sub>, 400 MHz) δ: 0.27-0.41 (m, 2H), 0.62-0.70 (m, 2H), 1.01-1.11 (m, 2H), 1.13-1.32 (m, 4H), 1.60-1.64 (m, 1H), 1.69-1.76 (m, 4H), 1.89-1.98 (m, 1H), 5.04 (ddd, 1H, *J* = 6.4, 6.4, 2.8 Hz), 5.16 (ddd, 1H, *J* = 6.4, 6.4, 1.2 Hz); <sup>13</sup>C-NMR (CDCl<sub>3</sub>, 100 MHz) δ: 6.4, 6.9, 9.5, 26.0, 26.2, 33.1, 37.4, 95.9, 99.0, 201.8; IR (ATR) ν: 2922, 2850, 1447, 1017, 889 cm<sup>-1</sup>; HRMS (APPI) Calcd for C<sub>12</sub>H<sub>19</sub>, [M+H]<sup>+</sup> 163.1481, found 163.1479; Colorless oil (23%, 180 mg)

**Scheme S10. Synthesis of 3m<sup>4,7</sup>**

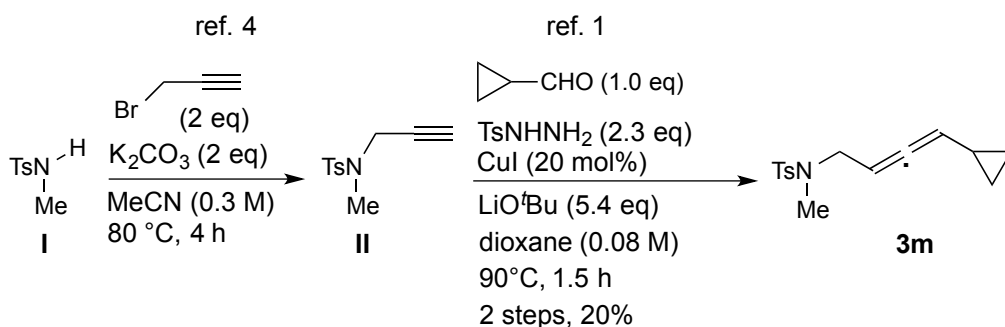

**N-(4-cyclopropylbuta-2,3-dien-1-yl)-N,4-dimethylbenzenesulfonamide (3m)**

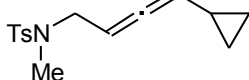

<sup>1</sup>H-NMR (CDCl<sub>3</sub>, 400 MHz) δ: 0.26-0.34 (m, 2H), 0.66-0.73 (m, 2H), 1.14-1.23 (m, 1H), 2.42 (s, 3H), 2.73 (s, 3H), 3.63 (d, 2H, *J* = 6.0 Hz), 5.00-5.06 (m, 2H), 7.31 (d, 2H, *J* = 8.0 Hz), 7.66 (d, 2H, *J* = 8.0 Hz); <sup>13</sup>C-NMR (CDCl<sub>3</sub>, 100 MHz) δ: 6.6, 6.7, 9.2, 34.0, 50.0, 88.0, 97.0, 127.3, 129.6, 134.6,

143.3, 204.9; IR (ATR)  $\nu$ : 3004, 1597, 1451, 1338, 1158, 1089, 1019  $\text{cm}^{-1}$ ; HRMS (ESI) Calcd for  $\text{C}_{15}\text{H}_{20}\text{N}\text{O}_2\text{S}$ ,  $[\text{M}+\text{H}]^+$  278.1215, found 278.1220; Colorless oil (20%, 133.4 mg)

**(3*E*,5*E*)-2-methyl-6-phenylhexa-3,5-dienitrile (4a)**

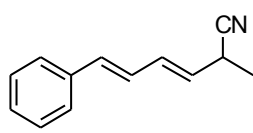  
 $^1\text{H-NMR}$  ( $\text{CDCl}_3$ , 400 MHz)  $\delta$ : 1.46 (d, 3H,  $J = 6.8$  Hz), 3.44 (qd, 1H,  $J = 6.8, 6.0$  Hz), 5.67 (dd, 1H,  $J = 10.4, 6.4$  Hz), 6.52 (dd, 1H,  $J = 15.2, 10.4$  Hz), 6.60 (d, 1H,  $J = 15.6$  Hz), 6.74 (dd, 1H,  $J = 15.6, 10.4$  Hz), 7.23-7.27 (m, 1H), 7.33 (dd, 2H,  $J = 7.2, 7.2$  Hz), 7.40 (d, 2H,  $J = 7.2$  Hz);  $^{13}\text{C-NMR}$  ( $\text{CDCl}_3$ , 100 MHz)  $\delta$ : 19.0, 28.1, 120.8, 126.5, 126.9, 127.6, 127.9, 128.6, 132.8, 134.1, 136.7; IR (ATR)  $\nu$ : 3025, 2984, 2937, 2240, 2216, 985, 747, 691  $\text{cm}^{-1}$ ; HRMS (APPI) Calcd for  $\text{C}_{13}\text{H}_{13}\text{NNa}$ ,  $[\text{M}+\text{H}]^+$  184.1121, found 184.1115; Colorless oil (72%, 28.4 mg)

**(3*E*,5*E*)-6-(4-methoxyphenyl)-2-methylhexa-3,5-dienitrile (4b)**

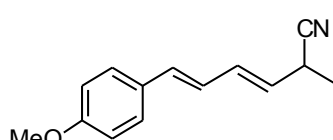  
 $^1\text{H-NMR}$  ( $\text{CDCl}_3$ , 400 MHz)  $\delta$ : 1.45 (d, 3H,  $J = 6.8$  Hz), 3.43 (dq, 1H,  $J = 6.8, 6.0$  Hz), 3.82 (s, 3H), 5.61 (dd, 1H,  $J = 14.8, 6.0$  Hz), 6.48 (dd, 1H,  $J = 15.2, 9.6$  Hz), 6.54 (d, 1H,  $J = 15.2$  Hz), 6.61 (dd, 1H,  $J = 15.2, 9.6$  Hz), 6.86 (d, 2H,  $J = 8.4$  Hz), 7.33 (d, 2H,  $J = 8.4$  Hz);  $^{13}\text{C-NMR}$  ( $\text{CDCl}_3$ , 100 MHz)  $\delta$ : 19.0, 28.1, 55.3, 114.1, 120.9, 124.9, 126.4, 127.7, 129.5, 133.0, 133.6, 159.5; IR (ATR)  $\nu$ : 2935, 2240, 1603, 1509, 1247, 1174, 1030, 984, 831  $\text{cm}^{-1}$ ; HRMS (APPI) Calcd for  $\text{C}_{14}\text{H}_{15}\text{ON}$ ,  $[\text{M}]^+$  213.1148, found 213.1141; Colorless solid (mp: 52-55  $^\circ\text{C}$ ; 49%, 17.6 mg)

**(3*E*,5*E*)-2-methyl-6-(4-(trifluoromethyl)phenyl)hexa-3,5-dienitrile (4c)**

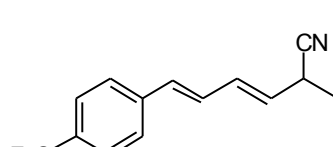  
 $^1\text{H-NMR}$  ( $\text{CDCl}_3$ , 400 MHz)  $\delta$ : 1.47 (d, 3H,  $J = 6.8$  Hz), 3.43-3.50 (m, 1H), 5.74 (dd, 1H,  $J = 15.6, 6.4$  Hz), 6.51-6.58 (m, 1H), 6.62 (d, 1H,  $J = 15.6$  Hz), 6.81 (dd, 1H,  $J = 15.6, 10.4$  Hz), 7.48 (d, 2H,  $J = 8.4$  Hz), 7.57 (d, 2H,  $J = 8.4$  Hz);  $^{13}\text{C-NMR}$  ( $\text{CDCl}_3$ , 100 MHz)  $\delta$ : 18.9, 28.1, 120.6, 125.6, 125.6, 126.6, 129.3, 129.4, 132.2, 132.4, 140.1; IR (ATR)  $\nu$ : 2989, 2243, 1613, 1415, 1321, 1163, 1118, 1106, 1065, 985, 839  $\text{cm}^{-1}$ ; HRMS (APPI) Calcd for  $\text{C}_{14}\text{H}_{12}\text{NF}_3$ ,  $[\text{M}]^+$  251.0916, found 251.0908; Yellow oil (65%, 49.0 mg)

**(3*E*,5*E*)-6-(4-(*tert*-butyl)phenyl)-2-methylhexa-3,5-dienitrile (4d)**

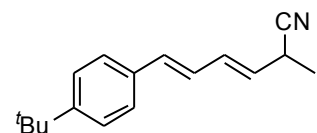  
 $^1\text{H-NMR}$  ( $\text{CDCl}_3$ , 400 MHz)  $\delta$ : 1.31 (s, 9H), 1.44 (d, 3H,  $J = 7.2$  Hz), 3.38-3.45 (m, 1H), 5.62 (dd, 1H,  $J = 15.2, 6.4$  Hz), 6.49 (dd, 1H,  $J = 15.2, 10.4$  Hz), 6.57 (d, 1H,  $J = 15.2$  Hz), 6.70 (dd, 1H,

$J = 15.2, 10.4$  Hz), 7.28-7.38 (m, 4H);  $^{13}\text{C-NMR}$  ( $\text{CDCl}_3$ , 100 MHz)  $\delta$ : 18.9, 28.1, 31.2, 34.6, 120.8, 125.6, 126.1, 126.2, 127.1, 132.9, 133.9, 151.1; IR (ATR)  $\nu$ : 2961, 2242, 1459, 1363, 1269, 985, 835, 732  $\text{cm}^{-1}$ ; HRMS (APPI) Calcd for  $\text{C}_{17}\text{H}_{21}\text{N}$ ,  $[\text{M}]^+ 239.1169$ , found 239.1660; Yellow oil (74%, 41.7 mg)

**(3*E*,5*E*)-6-(2-bromophenyl)-2-methylhexa-3,5-dienitrile (4e)**

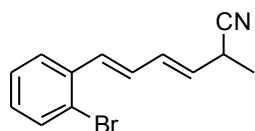

$^1\text{H-NMR}$  ( $\text{CDCl}_3$ , 400 MHz)  $\delta$ : 1.47-1.48 (d, 3H,  $J = 7.6$  Hz), 3.45 (dq, 1H,  $J = 7.6, 6.0$  Hz), 5.72 (dd, 1H,  $J = 15.2, 6.0$  Hz), 6.58 (dd, 1H,  $J = 15.2, 10.4$  Hz), 6.69 (dd, 1H,  $J = 10.4, 15.2$  Hz), 6.96 (d, 1H,  $J = 15.2$  Hz), 7.10 (dd, 1H,  $J = 7.2, 7.2$  Hz), 7.22-7.29 (m, 1H), 7.55 (dd, 2H,  $J = 7.2, 7.2$  Hz);  $^{13}\text{C-NMR}$  ( $\text{CDCl}_3$ , 100 MHz)  $\delta$ : 18.8, 28.1, 120.7, 124.0, 126.5, 127.5, 128.9, 129.1, 129.5, 132.6, 132.6, 133.1, 136.4; IR (ATR)  $\nu$ : 2934, 2242, 1465, 1437, 984, 747  $\text{cm}^{-1}$ ; HRMS (APPI) Calcd for  $\text{C}_{13}\text{H}_{12}\text{NBr}$ ,  $[\text{M}]^+ 261.0148$ , found 261.0138; Colorless oil (60%, 25.0 mg)

**(3*E*,5*E*)-6-(3-bromophenyl)-2-methylhexa-3,5-dienitrile (4f)**

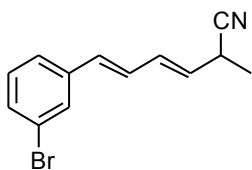

$^1\text{H-NMR}$  ( $\text{CDCl}_3$ , 400 MHz)  $\delta$ : 1.45 (d, 3H,  $J = 7.2$  Hz), 3.44 (dq, 1H,  $J = 7.2, 6.4$  Hz), 5.69 (dd, 1H,  $J = 16.0, 6.4$  Hz), 6.46-6.54 (m, 2H), 6.72 (dd, 1H,  $J = 16.0, 10.8$  Hz), 7.18 (dd, 1H,  $J = 7.6, 7.6$  Hz), 7.29 (d, 1H,  $J = 7.6$  Hz), 7.35-7.38 (m, 1H), 7.54 (dd, 1H,  $J = 1.6, 1.6$  Hz);  $^{13}\text{C-NMR}$  ( $\text{CDCl}_3$ , 100 MHz)  $\delta$ : 18.9, 28.1, 120.6, 122.8, 125.1, 128.3, 128.8, 129.1, 130.1, 130.7, 132.3, 132.3, 138.8; IR (ATR)  $\nu$ : 2985, 2243, 1588, 1471, 984, 731  $\text{cm}^{-1}$ ; HRMS (APPI) Calcd for  $\text{C}_{13}\text{H}_{12}\text{NBr}$ ,  $[\text{M}]^+ 261.0148$ , found 261.0142; Colorless oil (67%, 33.6 mg)

**(3*E*,5*E*)-6-(4-bromophenyl)-2-methylhexa-3,5-dienitrile (4g)**

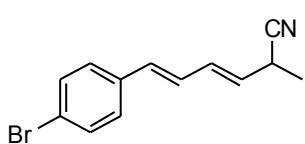

$^1\text{H-NMR}$  ( $\text{CDCl}_3$ , 400 MHz)  $\delta$ : 1.45 (d, 3H,  $J = 6.8$  Hz), 3.43 (dq, 1H,  $J = 6.8, 6.4$  Hz), 5.68 (dd, 1H,  $J = 15.2, 6.4$  Hz), 6.46-6.55 (m, 2H), 6.71 (dd, 1H,  $J = 15.2, 10.8$  Hz), 7.24 (d, 2H,  $J = 8.4$  Hz), 7.43 (d, 2H,  $J = 8.4$  Hz);  $^{13}\text{C-NMR}$  ( $\text{CDCl}_3$ , 100 MHz)  $\delta$ : 18.9, 28.1, 120.6, 121.7, 127.6, 127.9, 128.3, 131.7, 132.4, 132.7, 135.6; IR (ATR)  $\nu$ : 2986, 2241, 1486, 1071, 984, 827, 731  $\text{cm}^{-1}$ ; HRMS (APPI) Calcd for  $\text{C}_{13}\text{H}_{12}\text{NBr}$ ,  $[\text{M}+\text{H}]^+ 261.0148$ , found 261.0140; Colorless solid (mp: 35-39  $^\circ\text{C}$ , 68%, 61.8 mg)

**(3*E*,5*E*)-2-methyl-6-(naphthalen-2-yl)hexa-3,5-dienitrile (4h)**

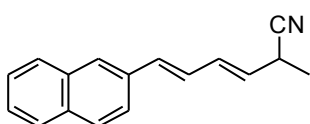

$^1\text{H-NMR}$  ( $\text{CDCl}_3$ , 400 MHz)  $\delta$ : 1.46 (d, 3H,  $J = 7.2$  Hz), 3.42-3.48 (m, 1H), 5.69 (dd, 1H,  $J = 15.2, 6.4$  Hz), 6.56 (dd, 1H,  $J = 15.2, 9.6$  Hz), 6.75 (d, 1H,  $J = 15.2, 9.6$  Hz), 7.42-7.49 (m,

2H), 7.59 (dd, 1H,  $J = 8.4, 1.6$  Hz), 7.74 (s, 1H), 7.77-7.83 (m, 3H);  $^{13}\text{C}$ -NMR ( $\text{CDCl}_3$ , 100 MHz)  $\delta$ : 19.0, 28.2, 120.8, 123.3, 126.1, 126.4, 126.8, 127.2, 127.7, 127.8, 128.0, 128.3, 132.8, 133.1, 133.5, 134.2; IR (ATR)  $\nu$ : 2996, 2239, 2215, 1507, 1454  $\text{cm}^{-1}$ ; HRMS (APPI) Calcd for  $\text{C}_{17}\text{H}_{15}\text{N}$ ,  $[\text{M}]^+ 233.1199$ , found 233.1190; Colorless solid (mp: 117-122  $^\circ\text{C}$ , 76%, 51.1 mg)

**(3*E*,5*E*)-2-methyl-6-(thiophen-2-yl)hexa-3,5-dienitrile (4i)**

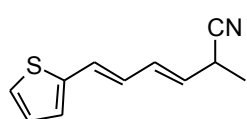

$^1\text{H}$ -NMR ( $\text{CDCl}_3$ , 400 MHz)  $\delta$ : 1.45 (d, 3H,  $J = 6.8$  Hz), 3.40-3.46 (m, 1H), 5.63 (dd, 1H,  $J = 15.2, 6.0$  Hz), 6.45 (dd, 1H,  $J = 15.2, 10.4$  Hz), 6.73 (d, 1H,  $J = 15.2$  Hz), 6.97-7.00 (m, 2H), 7.18 (d, 1H,  $J = 5.2$  Hz);  $^{13}\text{C}$ -NMR ( $\text{CDCl}_3$ , 100 MHz)  $\delta$ : 18.9, 28.1, 120.7, 124.9, 126.5, 126.8, 127.4, 127.6, 129.7, 132.2, 142.0; IR (ATR)  $\nu$ : 3022, 2984, 2936, 2241, 1593, 1452, 1210  $\text{cm}^{-1}$ ; HRMS (APPI) Calcd for  $\text{C}_{11}\text{H}_{11}\text{NS}$ ,  $[\text{M}]^+ 189.0607$ , found 189.0601; Yellow oil (50%, 38.1 mg)

**N-allyl-N-(2-((1*E*,3*E*)-5-cyanohepta-1,3-dien-1-yl)phenyl)-4-methylbenzenesulfonamide (4j)**

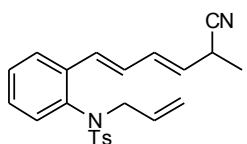

$^1\text{H}$ -NMR ( $\text{CDCl}_3$ , 400 MHz)  $\delta$ : 1.47 (d, 3H,  $J = 7.6$  Hz), 2.44 (s, 3H), 3.44 (qd, 1H,  $J = 7.6, 6.4$  Hz), 3.91-4.10 (brs, 1H), 4.17-4.33 (m, 1H), 4.95 (dd, 1H,  $J = 15.6, 1.2$  Hz), 4.99 (dd, 1H,  $J = 9.6, 1.2$  Hz), 5.65-5.79 (m, 2H), 6.40 (dd, 1H,  $J = 15.6, 9.6$  Hz), 6.64-6.86 (m, 3H), 7.13 (dd, 1H,  $J = 7.6, 7.6$  Hz), 7.28 (d, 2H,  $J = 8.8$  Hz), 7.30 (d, 1H,  $J = 8.8$  Hz), 7.58 (d, 2H,  $J = 8.8$  Hz), 7.62 (d, 1H,  $J = 8.8$  Hz);  $^{13}\text{C}$ -NMR ( $\text{CDCl}_3$ , 100 MHz)  $\delta$ : 18.9, 21.6, 28.1, 54.8, 119.4, 120.8, 125.9, 127.8, 128.1, 128.3, 128.5, 128.5, 129.5, 129.6, 132.3, 133.1, 136.0, 136.9, 137.6, 143.6; IR (ATR)  $\nu$ : 3024, 2242, 1597, 1481, 1450, 1343, 1162, 1091, 989  $\text{cm}^{-1}$ ; HRMS (ESI) Calcd for  $\text{C}_{23}\text{H}_{24}\text{N}_2\text{NaO}_2\text{S}$ ,  $[\text{M}+\text{Na}]^+ 415.1456$ , found 415.1449; Yellow oil (44%, 112 mg)

**(3*E*,5*E*)-2-methyl-6-phenylhepta-3,5-dienitrile (4k)**

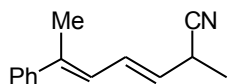

$^1\text{H}$ -NMR ( $\text{CDCl}_3$ , 400 MHz)  $\delta$ : 1.42 (d, 3H,  $J = 7.2$  Hz), 2.17 (s, 3H), 3.41 (qd, 1H,  $J = 7.2, 6.4$  Hz), 5.61 (dd, 1H,  $J = 14.8, 6.4$  Hz), 6.38 (d, 1H,  $J = 11.2$  Hz), 6.73 (ddd, 1H,  $J = 14.8, 11.2, 1.6$  Hz), 7.29-7.34 (m, 3H), 7.42 (d, 2H,  $J = 7.6$  Hz);  $^{13}\text{C}$ -NMR ( $\text{CDCl}_3$ , 100 MHz)  $\delta$ : 16.1, 19.0, 28.2, 120.9, 124.9, 125.6, 127.3, 127.8, 128.2, 129.1, 138.1, 142.5; IR (ATR)  $\nu$ : 3065, 2985, 2937, 2237, 1467, 1437, 1024, 963  $\text{cm}^{-1}$ ; HRMS (APPI) Calcd for  $\text{C}_{14}\text{H}_{16}\text{N}$ ,  $[\text{M}+\text{H}]^+ 198.1277$ , found 198.1273; Colorless oil (97%, 104.0 mg)

**(3*E*,5*E*)-6-cyclohexyl-2-methylhexa-3,5-dienitrile (4l)**





(54 mg)

### Scheme S12. Synthesis of 6a-g<sup>11</sup>

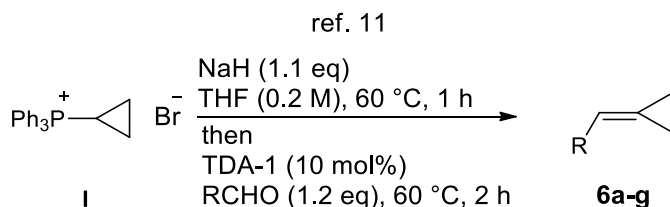

**(cyclopropylidenemethyl)benzene (6a)** (CAS-Reg# 7555-67-1)

(58%, 755.0 mg)

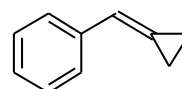

**1-(tert-butyl)-4-(cyclopropylidenemethyl)benzene (6b)**

(CAS-Reg# 918831-65-9)

(75%, 1.49 g)

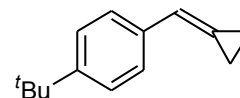

**1-bromo-3-(cyclopropylidenemethyl)benzene (6c)** (CAS-Reg#

888505-25-7)

(25%, 42.8 mg)

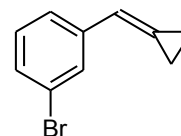

**1-bromo-4-(cyclopropylidenemethyl)benzene (6d)**

(CAS-Reg# 179251-27-5)

(84%, 1.68 g)

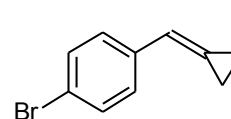

**1-(cyclopropylidenemethyl)-4-(trifluoromethyl)benzene (6e)**

(CAS-Reg# 243449-23-2)

(33%, 660 mg)

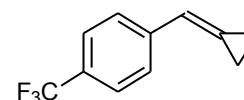

**2-(cyclopropylidenemethyl)naphthalene (6f)** (CAS-Reg#

68854-50-2)

(41%, 325.8 mg)

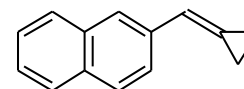

**2-(cyclopropylidenemethyl)thiophene (6g)**

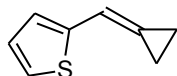

<sup>1</sup>H-NMR (CDCl<sub>3</sub>, 400 MHz) δ: 1.29-1.33 (m, 4H), 6.94 (dd, 1H, *J* = 1.6, 1.6 Hz), 6.98-7.00 (m, 2H), 7.15 (d, 1H, *J* = 4.8 Hz); <sup>13</sup>C-NMR (CDCl<sub>3</sub>, 100 MHz) δ: 2.9, 4.4, 112.7, 123.9, 124.1, 124.4, 127.2, 144.1; IR (ATR)

*v*: 3069, 3046, 2975, 1786, 1660, 1523, 1411, 1215, 1040 cm<sup>-1</sup>; HRMS (APPI) Calcd for C<sub>8</sub>H<sub>9</sub>S, [M+H]<sup>+</sup>137.0419, found 137.0418; Yellow oil (48%, 964.3 mg)

**(E)-2-methyl-4-phenylbut-3-enenitrile (7a)** (CAS-Reg#

112528-98-0)

(63%, 28.4 mg)

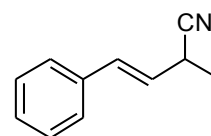

**(E)-4-(4-(tert-butyl)phenyl)-2-methylbut-3-enenitrile (7b)**

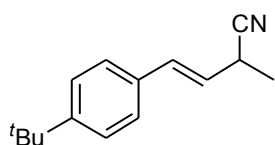

$^1\text{H-NMR}$  ( $\text{CDCl}_3$ , 400 MHz)  $\delta$ : 1.32 (s, 9H), 1.49 (d, 3H,  $J = 7.2$  Hz), 3.49 (qd, 1H,  $J = 7.2, 6.4$  Hz), 6.02 (dd, 1H,  $J = 16.0, 6.4$  Hz), 6.67 (d, 1H,  $J = 16.0$  Hz), 7.30 (d, 2H,  $J = 8.0$  Hz), 7.35 (d, 2H,  $J = 8.0$  Hz);  $^{13}\text{C-NMR}$  ( $\text{CDCl}_3$ , 100 MHz)  $\delta$ : 19.1, 28.4, 31.2, 34.6, 121.0, 123.5, 125.6, 126.2, 132.2, 132.9, 151.4; IR (ATR)  $\nu$ : 3734, 2962, 2242, 1783, 1509, 1456, 1363, 1269, 1109, 966, 814  $\text{cm}^{-1}$ ; HRMS (APPI) Calcd for  $\text{C}_{15}\text{H}_{19}\text{N}$ ,  $[\text{M}]^+ 213.1512$ , found 213.1507; Colorless oil (67%, 28.8 mg)

**(E)-4-(3-bromophenyl)-2-methylbut-3-enenitrile (7c)**

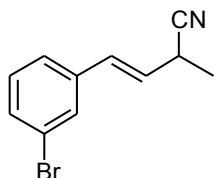

$^1\text{H-NMR}$  ( $\text{CDCl}_3$ , 400 MHz)  $\delta$ : 1.50 (d, 3H,  $J = 6.8$  Hz), 3.47-3.54 (m, 1H), 6.03-6.10 (m, 1H), 6.64 (dd, 1H,  $J = 15.6, 6.8$  Hz), 7.21 (dd, 1H,  $J = 8.0, 8.0$  Hz), 7.27 (dd, 1H,  $J = 7.2, 7.2$  Hz), 7.39 (dd, 1H,  $J = 7.2, 7.2$  Hz), 7.51 (d, 1H,  $J = 7.2$  Hz);  $^{13}\text{C-NMR}$  ( $\text{CDCl}_3$ , 100 MHz)  $\delta$ : 18.9, 28.3, 120.5, 122.8, 125.3, 125.8, 129.3, 130.2, 131.1, 137.7; IR (ATR)  $\nu$ : 2985, 2242, 1561, 1473, 1072, 961, 883  $\text{cm}^{-1}$ ; HRMS (APPI) Calcd for  $\text{C}_{11}\text{H}_{10}\text{NBr}$ ,  $[\text{M}]^+ 234.9991$ , found 234.9986; Colorless oil (72%, 31.2 mg)

**(E)-4-(4-bromophenyl)-2-methylbut-3-enenitrile (7d)**

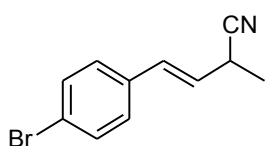

$^1\text{H-NMR}$  ( $\text{CDCl}_3$ , 400 MHz)  $\delta$ : 1.50 (d, 3H,  $J = 7.2$  Hz), 3.50 (qd, 1H,  $J = 7.2, 6.4$  Hz), 6.05 (dd, 1H,  $J = 16.0, 6.4$  Hz), 6.64 (d, 1H,  $J = 16.0$  Hz), 7.23 (d, 2H,  $J = 8.0$  Hz), 7.45 (d, 2H,  $J = 8.0$  Hz);  $^{13}\text{C-NMR}$  ( $\text{CDCl}_3$ , 100 MHz)  $\delta$ : 18.9, 28.3, 120.6, 122.1, 125.0, 128.0, 131.3, 131.8, 134.5; IR (ATR)  $\nu$ : 2991, 2939, 2243, 1487, 1072, 1008, 965, 807  $\text{cm}^{-1}$ ; HRMS (APPI) Calcd for  $\text{C}_{11}\text{H}_{10}\text{NBr}$ ,  $[\text{M}]^+ 234.9991$ , found 234.9987; Colorless solid (mp: 36-40  $^\circ\text{C}$ , 76%, 34.1 mg)

**(E)-2-methyl-4-(4-(trifluoromethyl)phenyl)but-3-enenitrile (7e)**

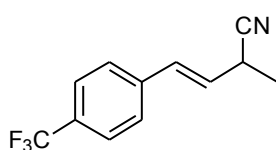

$^1\text{H-NMR}$  ( $\text{CDCl}_3$ , 400 MHz)  $\delta$ : 1.53 (d, 3H,  $J = 7.2$  Hz), 3.54 (qd,  $J = 7.2, 5.6$  Hz), 6.16 (dd, 1H,  $J = 16.0, 5.6$  Hz), 6.75 (d, 1H,  $J = 16.0$  Hz), 7.47 (d, 2H,  $J = 8.0$  Hz), 7.59 (d, 2H,  $J = 8.0$  Hz);  $^{13}\text{C-NMR}$  ( $\text{CDCl}_3$ , 100 MHz)  $\delta$ : 18.8, 28.3, 120.4, 125.6, 125.6, 126.7, 126.9, 131.1, 139.1; IR (ATR)  $\nu$ : 2991, 2245, 1617, 1416, 1263, 1164, 1119, 1107,

1065, 1016  $\text{cm}^{-1}$ ; HRMS (APPI) Calcd for  $\text{C}_{12}\text{H}_{10}\text{NF}_3$ ,  $[\text{M}]^+225.0760$ , found 225.0755;  
Colorless oil (79%, 47.3 mg)

**(E)-2-methyl-4-(naphthalen-2-yl)but-3-enitrile (7f)**

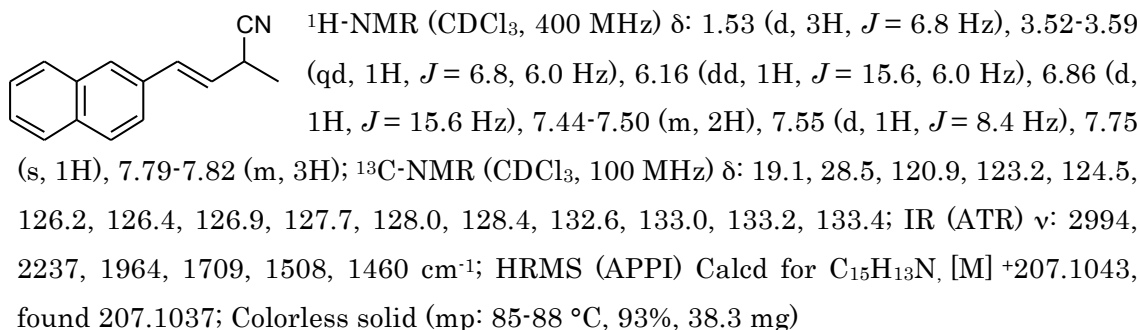

**(E)-2-methyl-4-(thiophen-2-yl)but-3-enitrile (7g)**

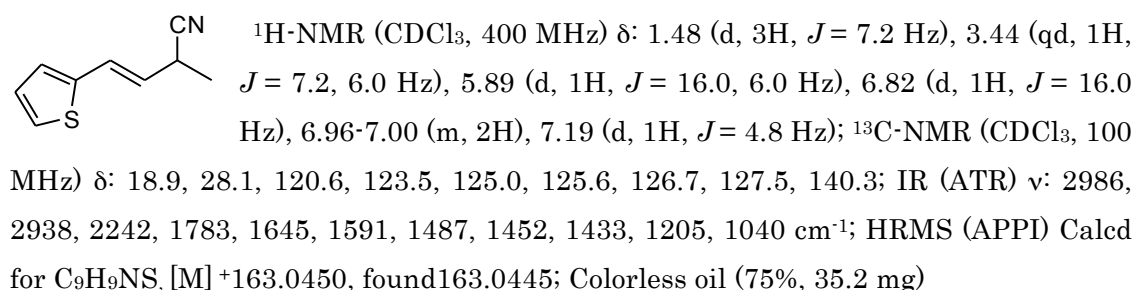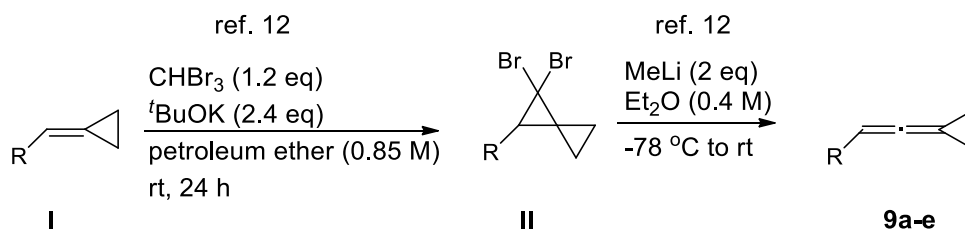

**Scheme S13. Synthesis of 9a-e**<sup>12</sup>

**(2-cyclopropylidenevinyl)benzene (9a)** (CAS-Reg# 42311-14-8)

(12%, 16.4 mg)

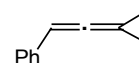

**1-(2-cyclopropylidenevinyl)-4-(trifluoromethyl)benzene (9b)**

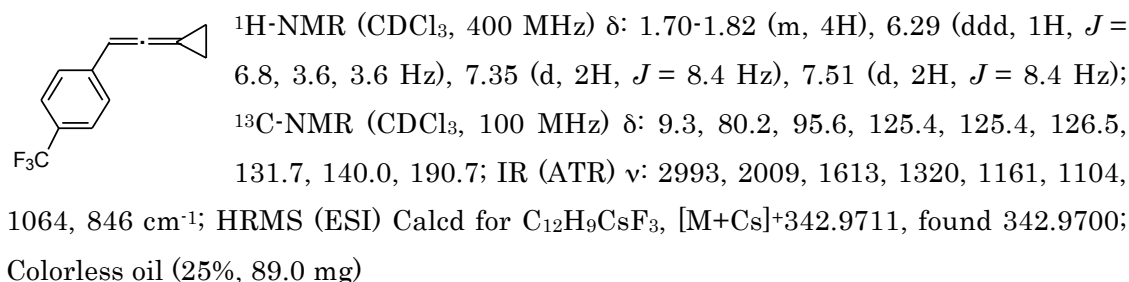

### 1-(*tert*-butyl)-4-(2-cyclopropylidenevinyl)benzene (9c)

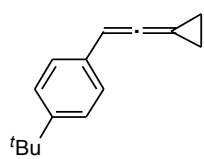

$^1\text{H-NMR}$  ( $\text{CDCl}_3$ , 400 MHz)  $\delta$ : 1.30 (s, 9H), 1.61-1.74 (m, 4H), 6.23 (ddd, 1H,  $J = 6.8, 3.6, 3.6$  Hz), 7.21 (d, 2H,  $J = 8.4$  Hz), 7.30 (d, 2H,  $J = 8.4$  Hz);  $^{13}\text{C-NMR}$  ( $\text{CDCl}_3$ , 100 MHz)  $\delta$ : 8.7, 31.4, 34.6, 80.0, 96.4, 125.6, 126.3, 133.0, 149.6, 189.9; IR (ATR)  $\nu$ : 2961, 2009, 1699, 1514, 1362, 1268, 841  $\text{cm}^{-1}$ ; HRMS (ESI) Calcd for  $\text{C}_{15}\text{H}_{18}\text{Cs}$ ,  $[\text{M}+\text{Cs}]^+331.0463$ , found 331.0466; Yellow oil (5%, 9.5 mg)

### 1-bromo-4-(2-cyclopropylidenevinyl)benzene (9d)

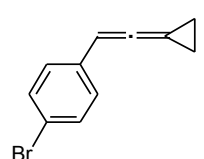

$^1\text{H-NMR}$  ( $\text{CDCl}_3$ , 400 MHz)  $\delta$ : 1.66-1.78 (m, 4H), 6.22 (ddd, 1H,  $J = 6.8, 3.6, 3.6$  Hz), 7.13 (d, 2H,  $J = 8.4$  Hz), 7.38 (d, 2H,  $J = 8.4$  Hz);  $^{13}\text{C-NMR}$  ( $\text{CDCl}_3$ , 100 MHz)  $\delta$ : 8.9, 80.3, 95.7, 119.8, 128.0, 131.5, 133.0, 189.9; IR (ATR)  $\nu$ : 2985, 2008, 1475, 1008, 831  $\text{cm}^{-1}$ ; HRMS (ESI) Calcd for  $\text{C}_{11}\text{H}_9\text{BrCs}$ ,  $[\text{M}+\text{Cs}]^+352.8942$ , found 352.8947; yellow oil (5%, 25.6 mg)

### 2-(2-cyclopropylidenevinyl)naphthalene (9e)

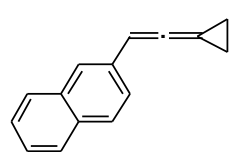

$^1\text{H-NMR}$  ( $\text{CDCl}_3$ , 400 MHz)  $\delta$ : 1.69-1.82 (m, 4H), 6.46 (ddd, 1H,  $J = 7.2, 3.6, 3.6$  Hz), 7.38-7.48 (m, 3H), 7.76 (s, 1H), 7.73-7.82 (m, 3H);  $^{13}\text{C-NMR}$  ( $\text{CDCl}_3$ , 100 MHz)  $\delta$ : 8.9, 80.2, 96.9, 124.8, 124.9, 125.3, 126.1, 127.6, 127.7, 128.0, 132.4, 133.4, 133.7, 190.3; IR (ATR)  $\nu$ : 3045, 2006, 1597, 1508, 902, 822  $\text{cm}^{-1}$ ; HRMS (ESI) Calcd for  $\text{C}_{15}\text{H}_{12}\text{Cs}$ ,  $[\text{M}+\text{Cs}]^+324.9994$ , found 324.9981; Colorless solid (mp: 63-65  $^\circ\text{C}$ , 13%, 124.1 mg)

### Scheme S14. Synthesis of 9f<sup>13-15</sup>

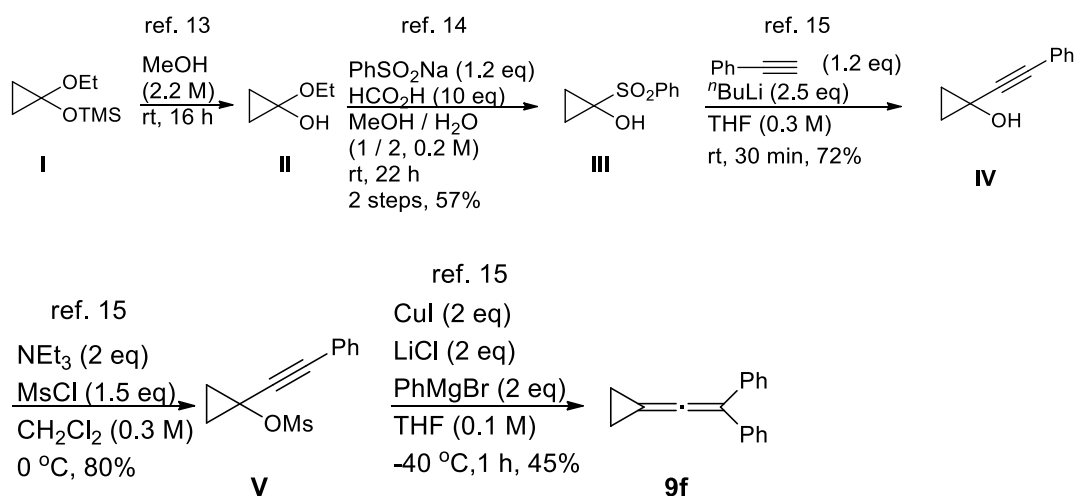

**(2-cyclopropylideneethene-1,1-diyl)dibenzene (9f)** (CAS-Reg#

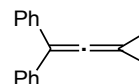

1403484-23-0)

(40%, 187.6 mg)

**(E)-1-styrylcyclopropanecarbonitrile (10a)**

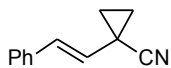

$^1\text{H-NMR}$  ( $\text{CDCl}_3$ , 400 MHz)  $\delta$ : 1.15-1.25 (m, 2H), 1.55-1.65 (m, 2H), 5.51 (d, 1H,  $J = 15.6$  Hz), 6.80 (d, 1H,  $J = 15.6$  Hz), 7.25-7.33 (m, 5H);  $^{13}\text{C-NMR}$  ( $\text{CDCl}_3$ , 100 MHz)  $\delta$ : 12.5, 16.8, 121.3, 126.1, 126.2, 127.9, 128.7, 130.8, 135.8; IR (ATR)  $\nu$ : 3025, 2234, 1448, 1071, 963, 806  $\text{cm}^{-1}$ ; HRMS (ESI) Calcd for  $\text{C}_{12}\text{H}_{11}\text{CN}$ ,  $[\text{M}+\text{Cs}]^+$  301.9946, found 301.9939; Colorless oil (63%, 12.2 mg)

**(E)-1-(4-(trifluoromethyl)styryl)cyclopropanecarbonitrile (10b)**

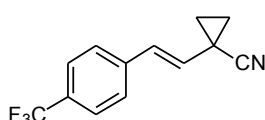

$^1\text{H-NMR}$  ( $\text{CDCl}_3$ , 400 MHz)  $\delta$ : 1.26 (dd, 2H,  $J = 7.2, 5.6$  Hz), 1.66 (dd, 2H,  $J = 7.2, 5.6$  Hz), 5.59 (d, 1H,  $J = 15.6$  Hz), 6.84 (d, 1H,  $J = 15.6$  Hz), 7.42 (d, 2H,  $J = 8.4$  Hz), 7.56 (d, 2H,  $J = 8.4$  Hz);  $^{13}\text{C-NMR}$  ( $\text{CDCl}_3$ , 100 MHz)  $\delta$ : 12.7, 17.1, 120.9, 125.6, 125.7, 126.3, 129.1, 129.4, 139.2; IR (ATR)  $\nu$ : 3016, 2240, 1326, 1103, 1067, 967  $\text{cm}^{-1}$ ; HRMS (ESI) Calcd for  $\text{C}_{13}\text{H}_{10}\text{CF}_3\text{N}$ ,  $[\text{M}+\text{Cs}]^+$  369.9820, found 369.9826; Colorless solid (mp: 91-93  $^\circ\text{C}$ , 76%, 35.9 mg)

**(E)-1-(4-(tert-butyl)styryl)cyclopropanecarbonitrile (10c)**

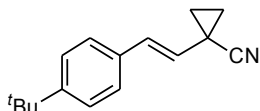

$^1\text{H-NMR}$  ( $\text{CDCl}_3$ , 400 MHz)  $\delta$ : 1.15-1.21 (m, 2H), 1.31 (s, 9H), 1.58-1.62 (m, 2H), 5.48 (d, 1H,  $J = 16.0$  Hz), 6.78 (d, 1H,  $J = 16.0$  Hz), 7.26 (d, 2H,  $J = 8.4$  Hz), 7.33 (d, 2H,  $J = 8.4$  Hz);  $^{13}\text{C-NMR}$  ( $\text{CDCl}_3$ , 100 MHz)  $\delta$ : 12.5, 16.8, 31.2, 34.6, 121.5, 125.4, 125.6, 125.8, 129.7, 130.6, 133.0; IR (ATR)  $\nu$ : 2961, 2235, 963, 828  $\text{cm}^{-1}$ ; HRMS (ESI) Calcd for  $\text{C}_{16}\text{H}_{19}\text{CN}$ ,  $[\text{M}+\text{Cs}]^+$  358.0572, found 358.0562; Colorless solid (mp: 65-69  $^\circ\text{C}$ , 65%, 4.6 mg)

**(E)-1-(4-bromostyryl)cyclopropanecarbonitrile (10d)**

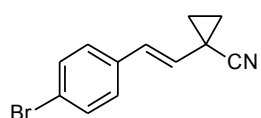

$^1\text{H-NMR}$  ( $\text{CDCl}_3$ , 400 MHz)  $\delta$ : 1.20-1.23 (m, 2H), 1.61-1.65 (m, 2H), 5.50 (d, 1H,  $J = 16.0$  Hz), 6.74 (d, 1H,  $J = 16.0$  Hz), 7.19 (d, 2H,  $J = 8.0$  Hz), 7.43 (d, 2H,  $J = 8.0$  Hz);  $^{13}\text{C-NMR}$  ( $\text{CDCl}_3$ , 100 MHz)  $\delta$ : 12.6, 16.9, 121.1, 121.7, 127.1, 127.6, 129.7, 131.8, 134.8; IR (ATR)  $\nu$ : 3016, 2237, 1488, 1068, 957  $\text{cm}^{-1}$ ; HRMS (ESI) Calcd for  $\text{C}_{12}\text{H}_{10}\text{BrCN}$ ,  $[\text{M}+\text{Cs}]^+$  379.9051, found 379.9043; Colorless solid (mp: 105-107  $^\circ\text{C}$ , 82%, 23.6 mg)

**(E)-1-(2-(naphthalen-2-yl)vinyl)cyclopropanecarbonitrile (10e)**

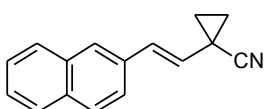

$^1\text{H-NMR}$  ( $\text{CDCl}_3$ , 400 MHz)  $\delta$ : 1.24 (dd, 2H,  $J = 6.8, 5.2$  Hz), 1.63

(dd, 2H,  $J = 6.8, 5.2$  Hz), 5.63 (d, 1H,  $J = 15.6$  Hz), 6.96 (d, 1H,  $J = 15.6$  Hz), 7.43-7.50 (m, 3H), 7.72-7.80 (m, 4H);  $^{13}\text{C}$ -NMR ( $\text{CDCl}_3$ , 100 MHz)  $\delta$ : 12.7, 16.9, 121.3, 123.0, 126.0, 126.2, 126.4, 126.5, 127.6, 128.0, 128.3, 130.8, 133.0, 133.2, 133.5; IR (ATR)  $\nu$ : 3054, 2236, 969, 954, 818  $\text{cm}^{-1}$ ; HRMS (ESI) Calcd for  $\text{C}_{16}\text{H}_{13}\text{CsN}$ ,  $[\text{M}+\text{Cs}]^+352.0102$ , found 352.0092; Colorless solid (mp: 93-95  $^\circ\text{C}$ , quant, 31.6 mg)

**1-(2,2-diphenylvinyl)cyclopropanecarbonitrile (10f)**

(CAS-Reg# 260261-08-3)

(17%, 7.9 mg)

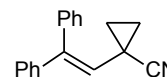

**References**

- 4) M. L. Hossain, F. Ye, Yan Zhang, J. Wang, *J. Org. Chem.* **2013**, *78*, 1236.
- 5) T. Zhang, Z. Qi, X. Zhang, L. Wu, X. Li, *Chem. Eur. J.* **2014**, *20*, 3283.
- 6) S. K. Padhi, K. Kobayashi, S. Masuno, K. Tanaka, *Inorg. Chem.* **2011**, *50*, 5321
- 7) K. Hirano, A. T. Biju, I. Piel, F. Glorius, *J. Am. Chem. Soc.* **2009**, *131*, 14190.
- 8) P. Garcia, Y. Harrak, L. Diab, P. Cordier, C. Ollivier, V. Gandon, M. Malacria, L. Fensterbank, C. Aubert. *Org. Lett.* **2011**, *13*, 2952.
- 9) M. A. Kacprzynski, S. A. Kazane, T. L. May, A. H. Hoveyda, *Org. Lett.*, **2007**, *9*, 3187
- 10) H. Ito, T. Nakamura, T. Taguchi, Y. Hanazawa, *Tetrahedron*, **1995**, *51*, 4507
- 11) J. A. Stafford, J. E. McMurry, *Tetrahedron Lett.* **1988**, *29*, 2531
- 12) K. N. Sedenkova, E. B. Averina, Y. K. Grishin, V. B. Rybakov, T. S. Kuznetzova, N. S. Zefirov, *Eur. J. Org. Chem.* **2010**, 4145.
- 13) F. Romanov-Michailidis, L. Guénée, A. Alexakis, *Angew. Chem. Int. Ed.* **2013**, *52*, 9266.
- 14) J. Liu, Y. An, H.-Y. Jiang, Z. Chen, *Tetrahedron Lett.* **2008**, *49*, 490.
- 15) W. Yuan, X. Dong, Y. Wei, M. Shi, *Chem. Eur. J.* **2012**, *18*, 10501.

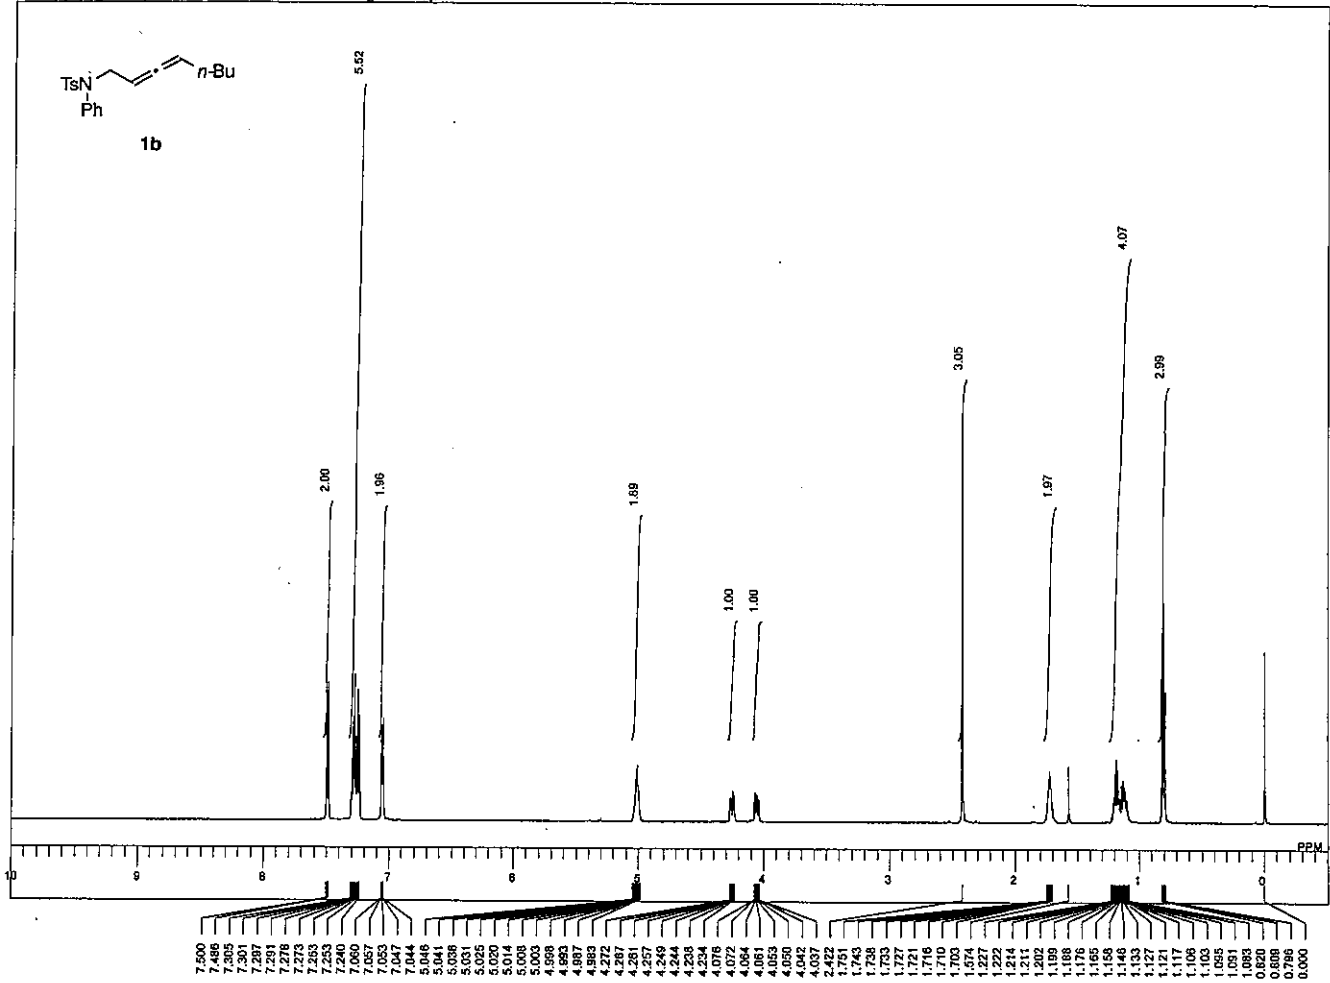

DFILE GSYA-140305-14-  
COMINT single\_pulse  
DATIM 2014-03-05 12:25  
OBNUC 1H  
EXMOD proton.jxp  
OBFREQ 600.17 MHz  
OBSET 5.30 KHz  
OBFIN 5.47 Hz  
POINT 16384  
FREQU 11281.26 Hz  
SCANS 4  
ACQTM 1.4549 sec  
PD 5.0000 sec  
PWI 6.55 usec  
IRNUC 1H  
CTEMP 17.7 c  
SLVNT CDCL3  
EXREF 0.00 ppm  
BF 0.12 Hz  
RGAIN 40

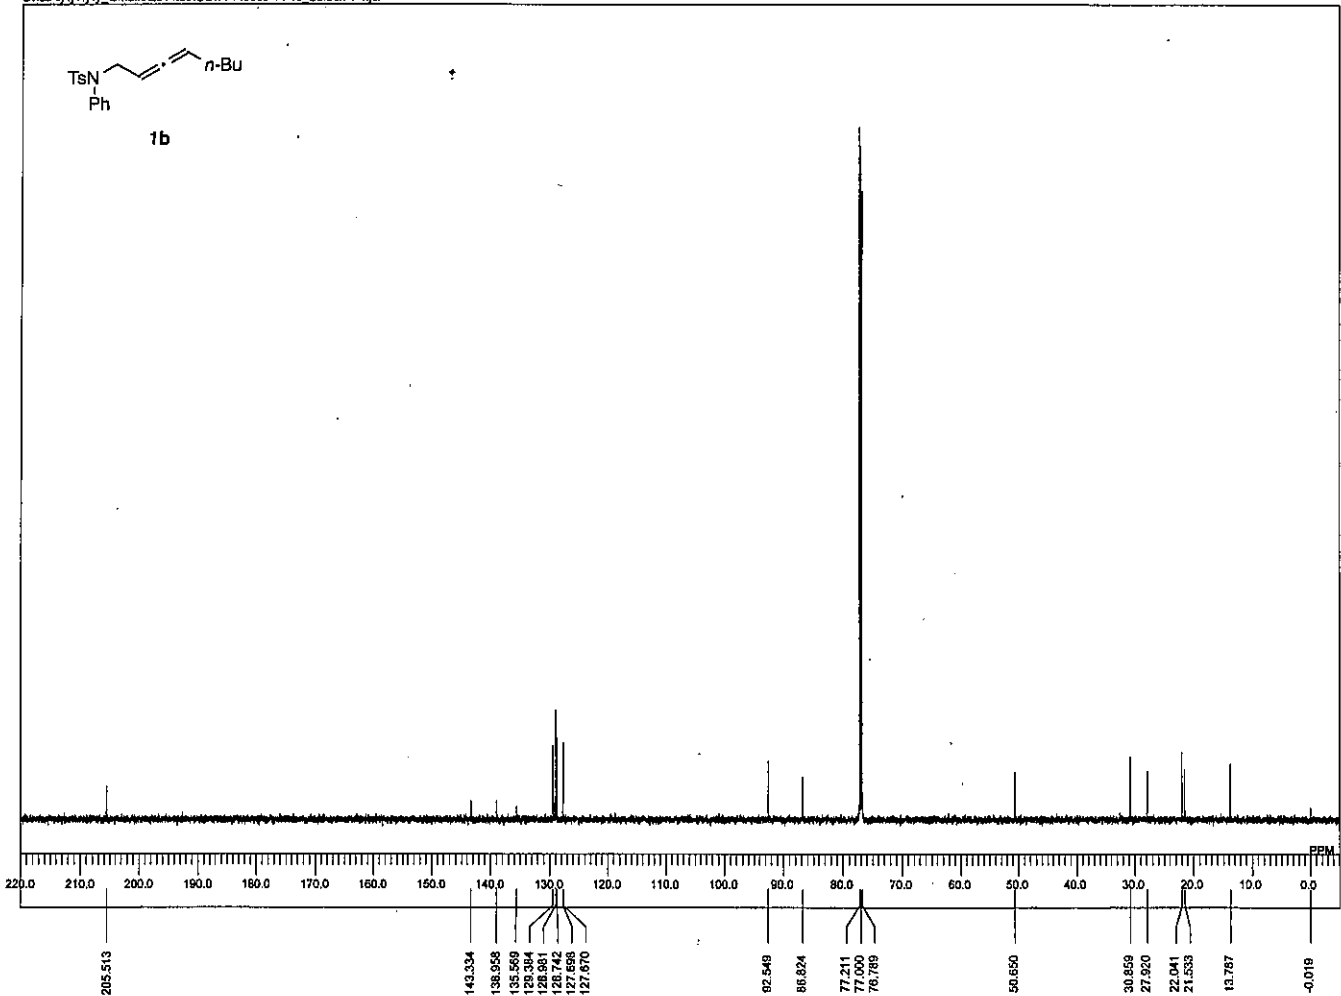

DFILE GSYA-140305-14-  
COMINT single\_pulse decou  
DATIM 2014-03-05 12:26  
OBNUC 13C  
EXMOD carbon.jxp  
OBFREQ 150.92 MHz  
OBSET 8.52 KHz  
OBFIN 1.74 Hz  
POINT 32767  
FREQU 47348.49 Hz  
SCANS 1024  
ACQTM 0.6921 sec  
PD 2.0000 sec  
PWI 3.27 usec  
IRNUC 1H  
CTEMP 18.9 c  
SLVNT CDCL3  
EXREF 77.00 ppm  
BF 1.00 Hz  
RGAIN 50



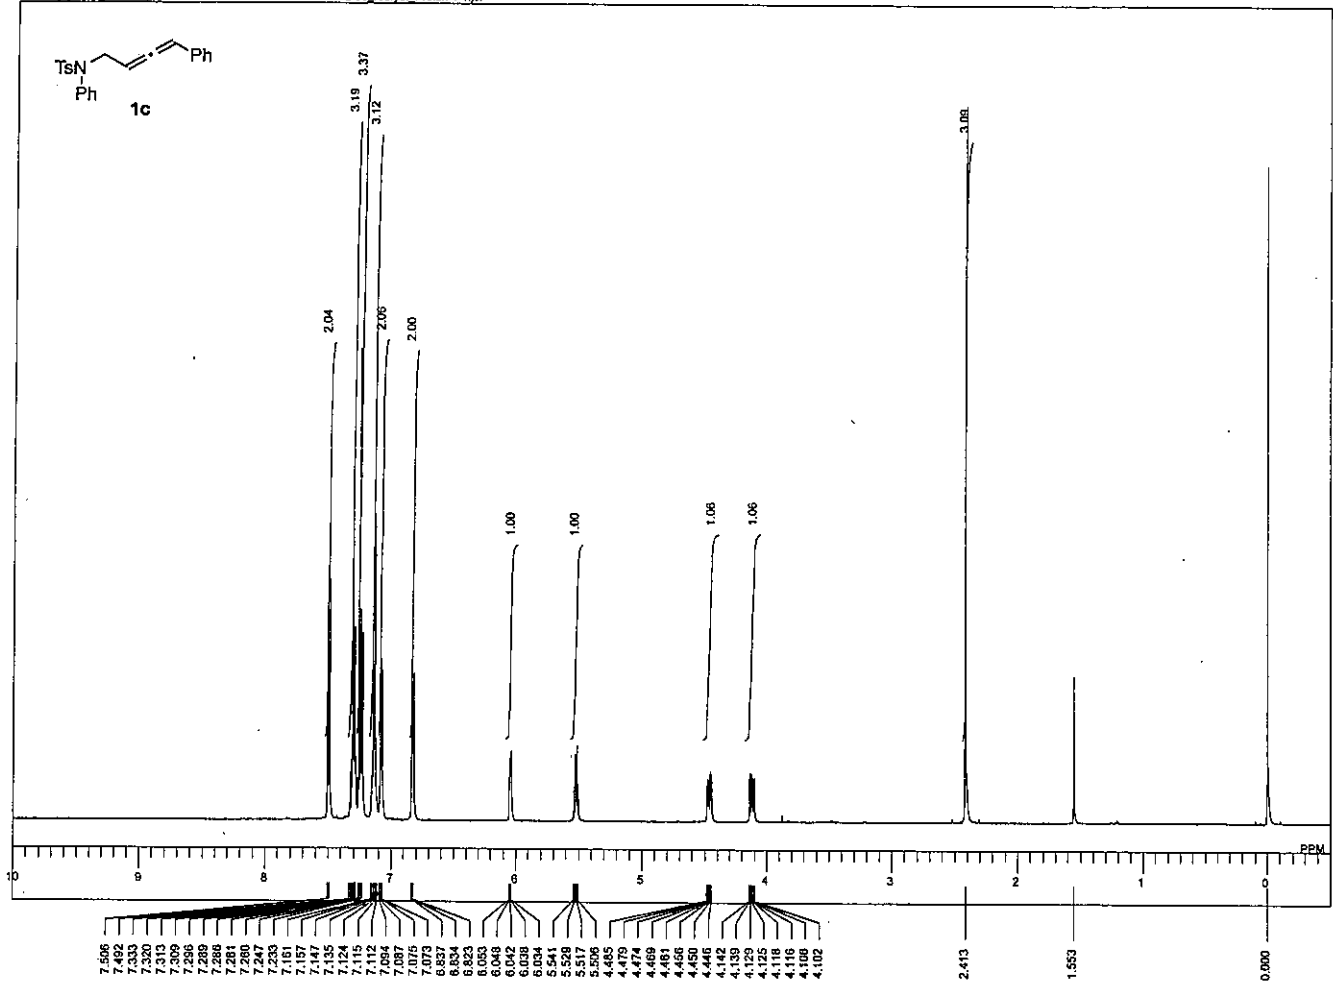

DFILE GSYA-131118-12  
 COMNT single\_pulse  
 DATIM 2013-11-16 15:37:  
 OBNUC 1H  
 EXMOD proton\_jcp  
 OBFREQ 600.17 MHz  
 OBSET 5.30 KHz  
 OBFIN 5.47 Hz  
 POINT 16384  
 FREQU 11261.26 Hz  
 SCANS 4  
 ACQTM 1.4549 sec  
 PD 5.0000 sec  
 PW1 6.55 usec  
 IRNUC 1H  
 CTEMP 19.2 c  
 SLVNT CDCl3  
 EXREF 0.00 ppm  
 BF 0.12 Hz  
 RGAIN 48

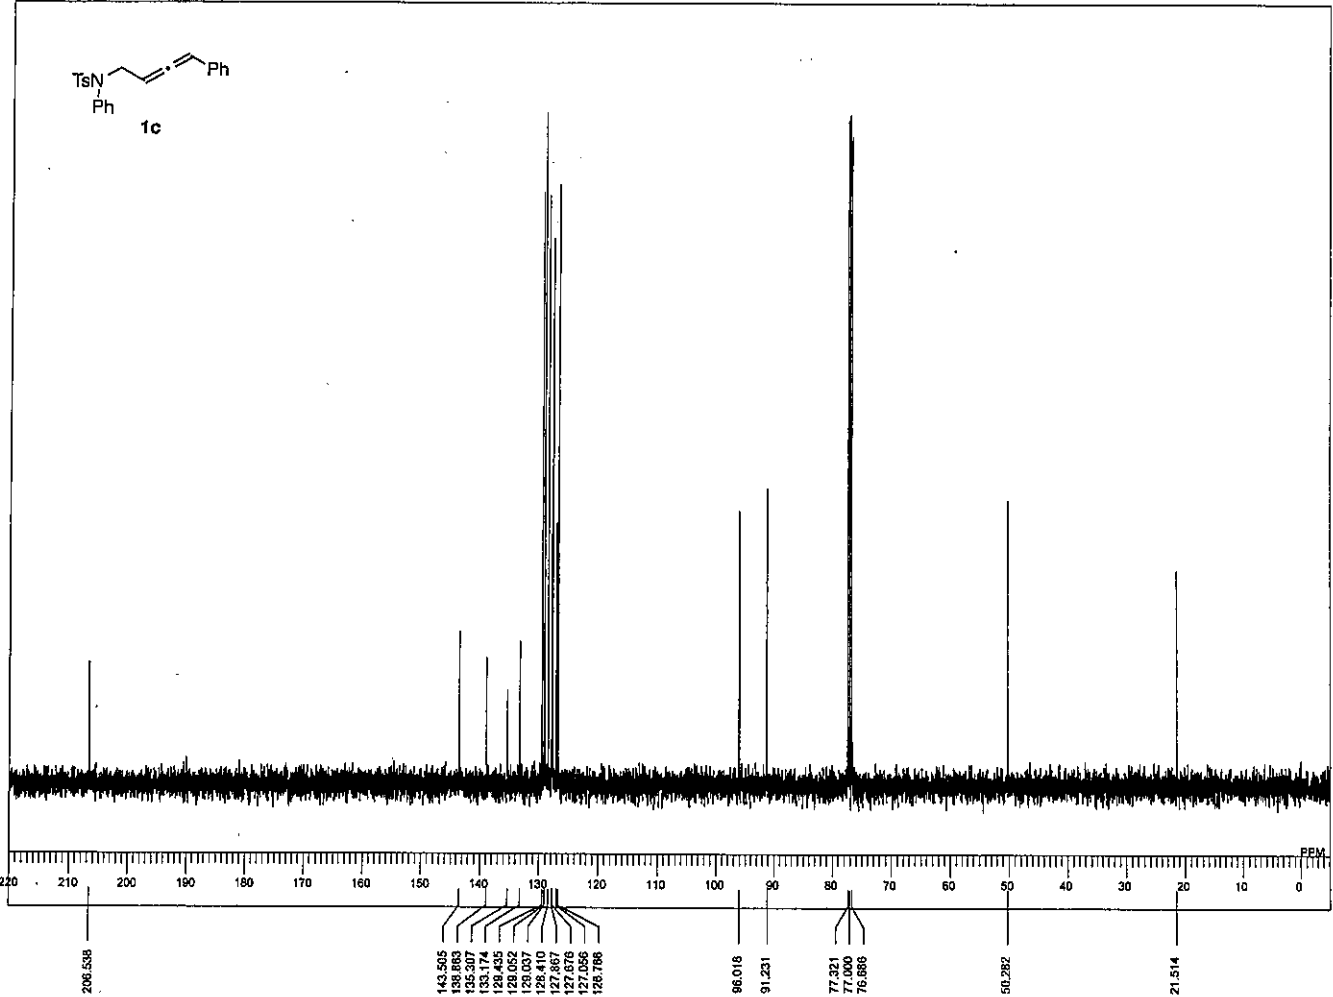

DFILE GSYA-140219-Ph  
 COMNT  
 DATIM 2014-02-19 16:49:  
 OBNUC 13C  
 EXMOD single\_pulse\_dec  
 OBFREQ 100.53 MHz  
 OBSET 5.35 KHz  
 OBFIN 5.88 Hz  
 POINT 32768  
 FREQU 25188.92 Hz  
 SCANS 101  
 ACQTM 1.3009 sec  
 PD 1.0000 sec  
 PW1 3.17 usec  
 IRNUC 1H  
 CTEMP 21.0 c  
 SLVNT CDCl3  
 EXREF 77.00 ppm  
 BF 1.00 Hz  
 RGAIN 23

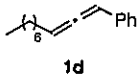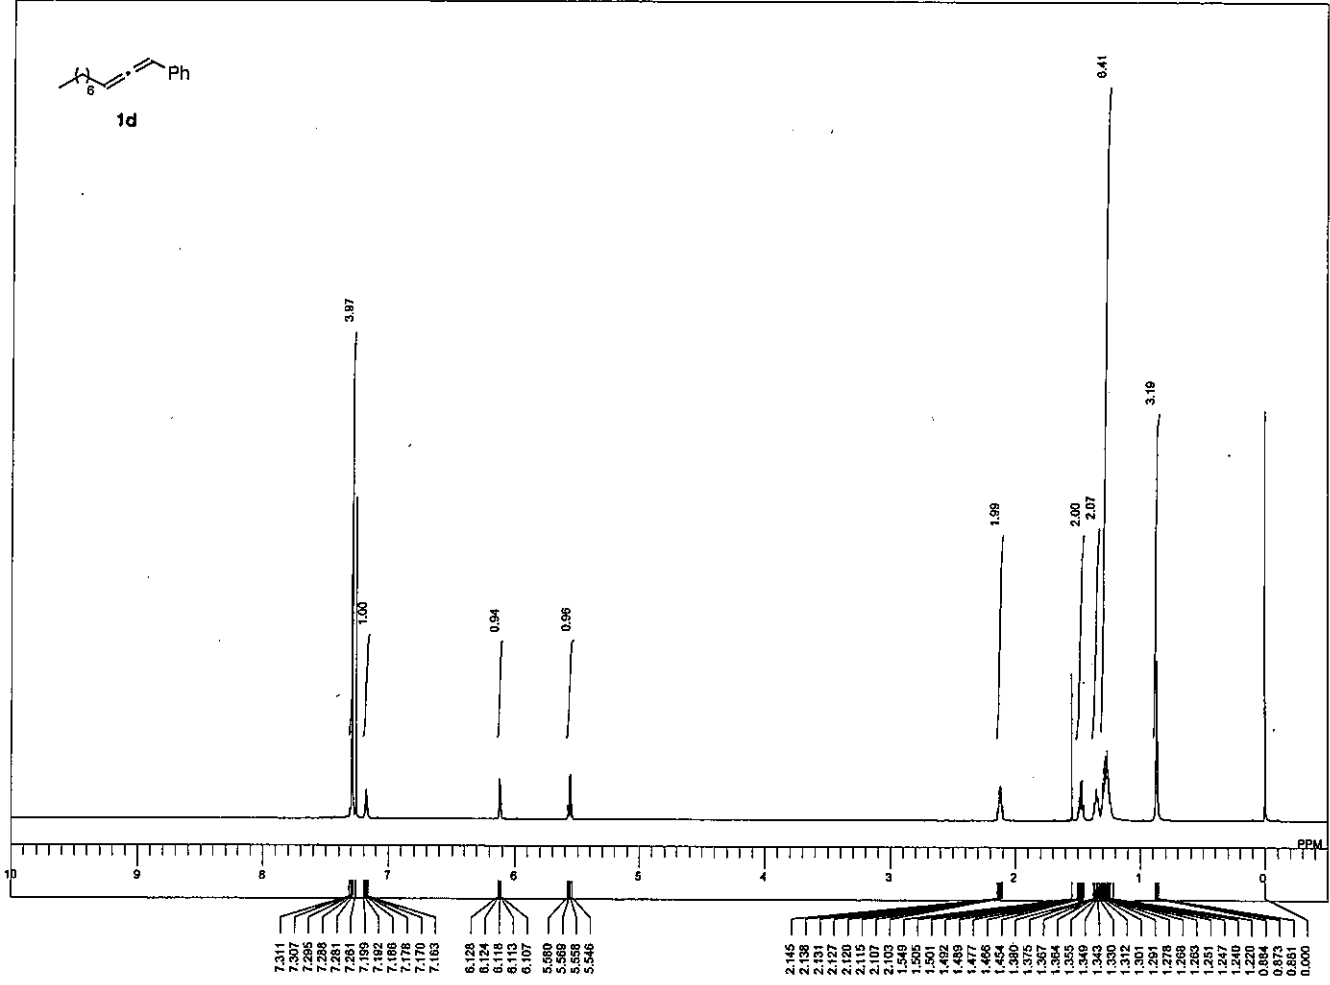

OFILE GSYA-131105-12  
 COMNT single\_pulse  
 DATIM 2013-11-05 12:30  
 OBNUC 1H  
 EXMOD proton.kp  
 OBFREQ 600.17 MHz  
 OBSET 5.30 KHz  
 OBFIN 5.47 Hz  
 POINT 16364  
 FREQU 11261.26 Hz  
 SCANS 4  
 ACQTM 1.4549 sec  
 PD 5.0000 sec  
 PWI 6.55 usec  
 IRNUC 1H  
 CTEMP 18.0 c  
 SLVNT CDCL3  
 EXREF 0.00 ppm  
 BF 0.12 Hz  
 RGAIN 48

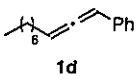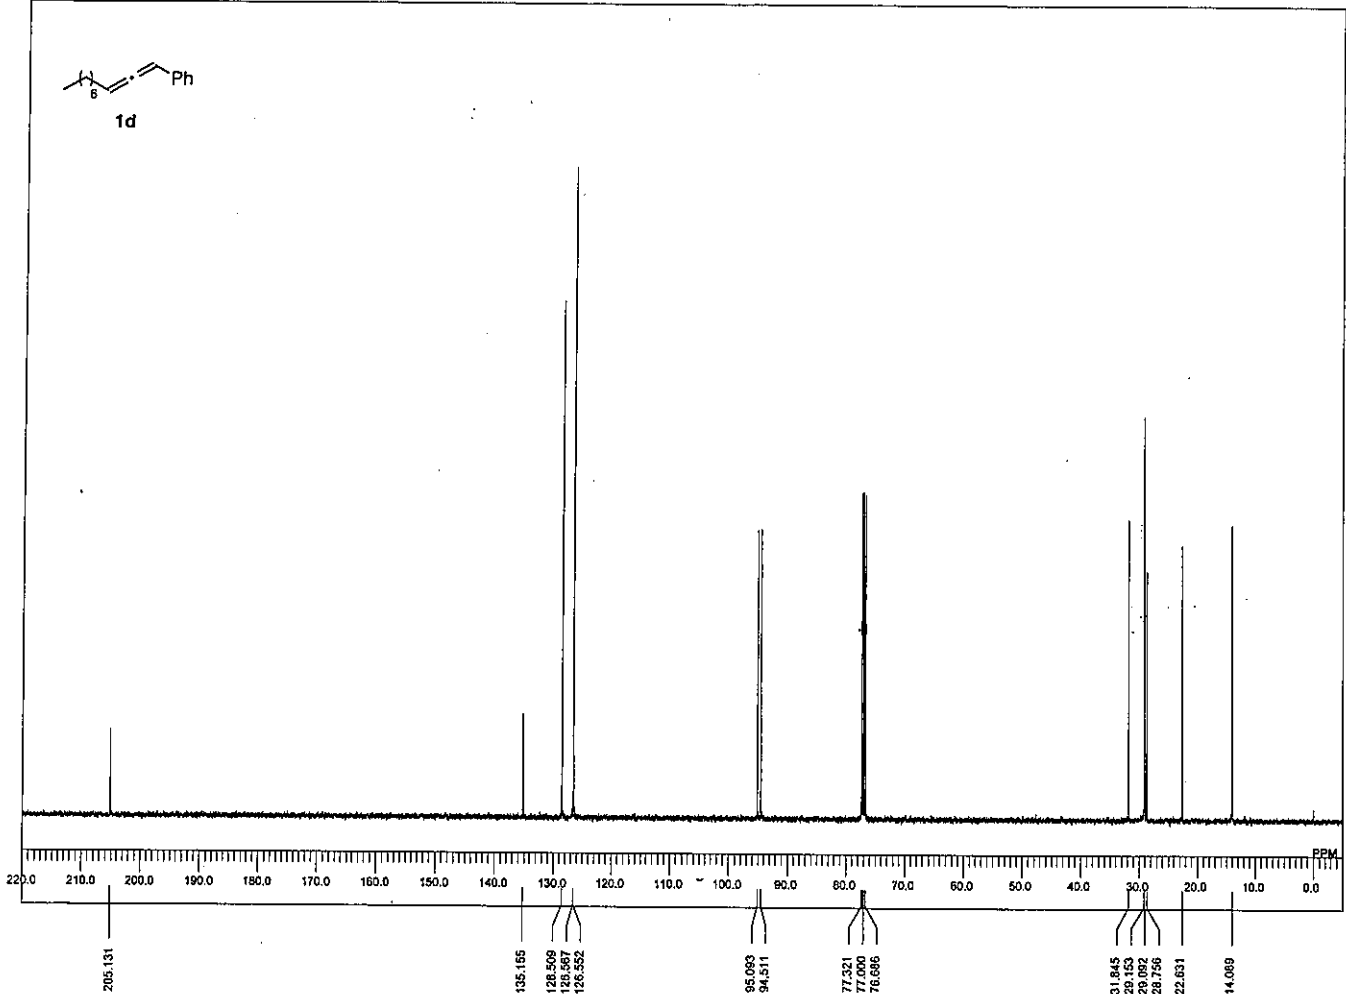

OFILE GSYA-131204-12  
 COMNT  
 DATIM 2013-12-04 18:52  
 OBNUC 13C  
 EXMOD single\_pulse\_dec  
 OBFREQ 100.53 MHz  
 OBSET 5.35 KHz  
 OBFIN 5.65 Hz  
 POINT 32788  
 FREQU 25168.92 Hz  
 SCANS 1000  
 ACQTM 1.3009 sec  
 PD 1.0000 sec  
 PWI 3.33 usec  
 IRNUC 1H  
 CTEMP 22.8 c  
 SLVNT CDCL3  
 EXREF 77.00 ppm  
 BF 1.00 Hz  
 RGAIN 24

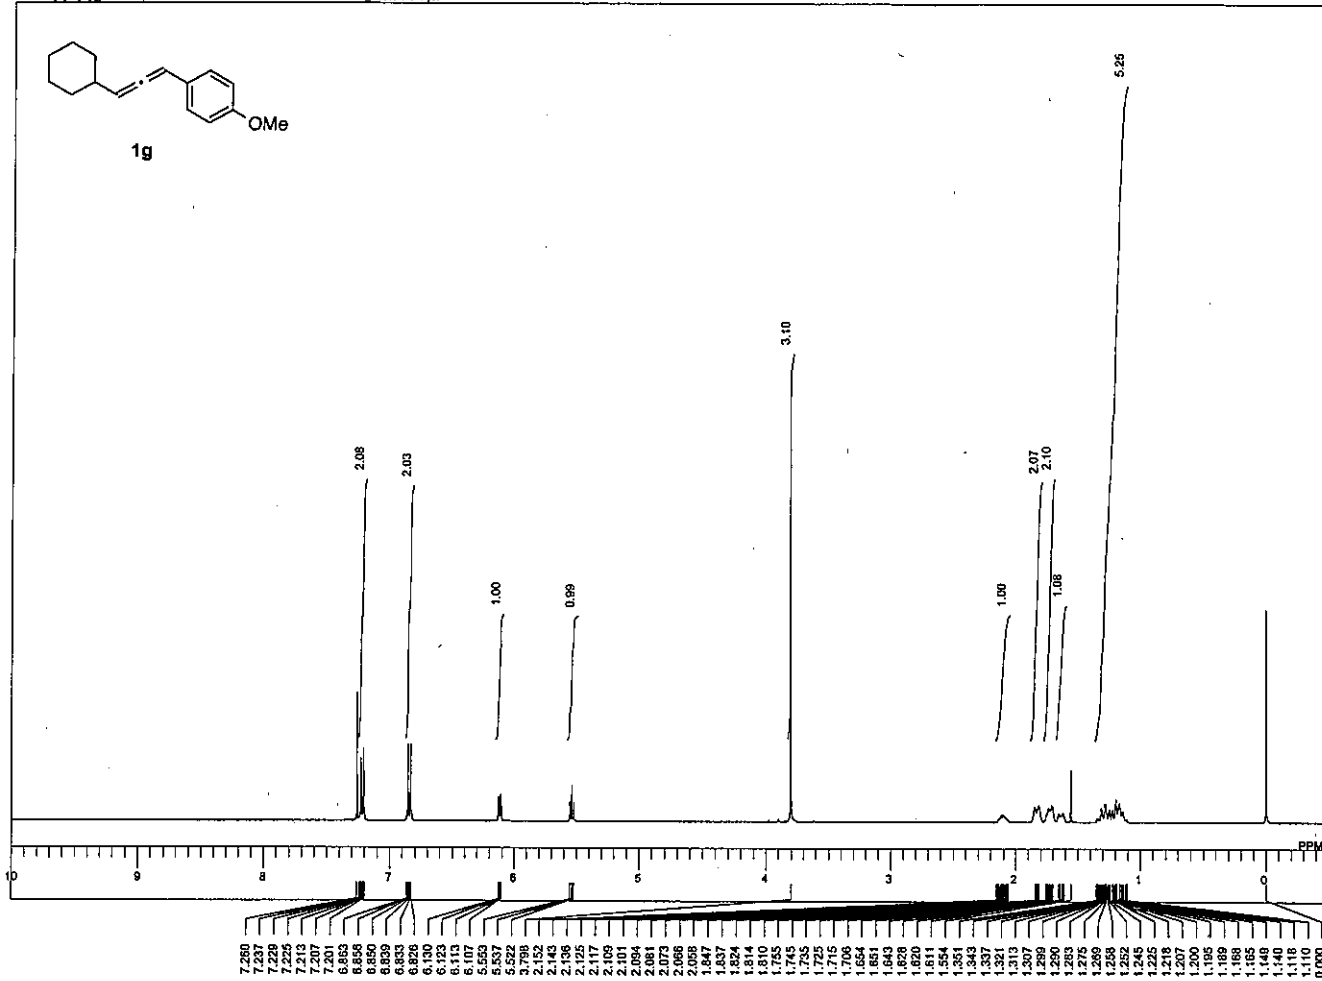

DFILE GSYA-131101-12  
 COMNT single\_pulse  
 DATIM 2013-11-01 11:59  
 OBNUC 1H  
 EXMOD proton.jxp  
 OBFREQ 399.78 MHz  
 OBSET 4.19 KHz  
 OBFIN 7.28 Hz  
 POINT 18384  
 FREQU 7503.00 Hz  
 SCANS 4  
 ACQTM 2.1837 sec  
 PD 5.0000 sec  
 PW1 5.01 usec  
 IRNUC 1H  
 CTEMP 18.3 c  
 SLVNT CDCL3  
 EXREF 0.00 ppm  
 BF 0.12 Hz  
 RGAIN 44

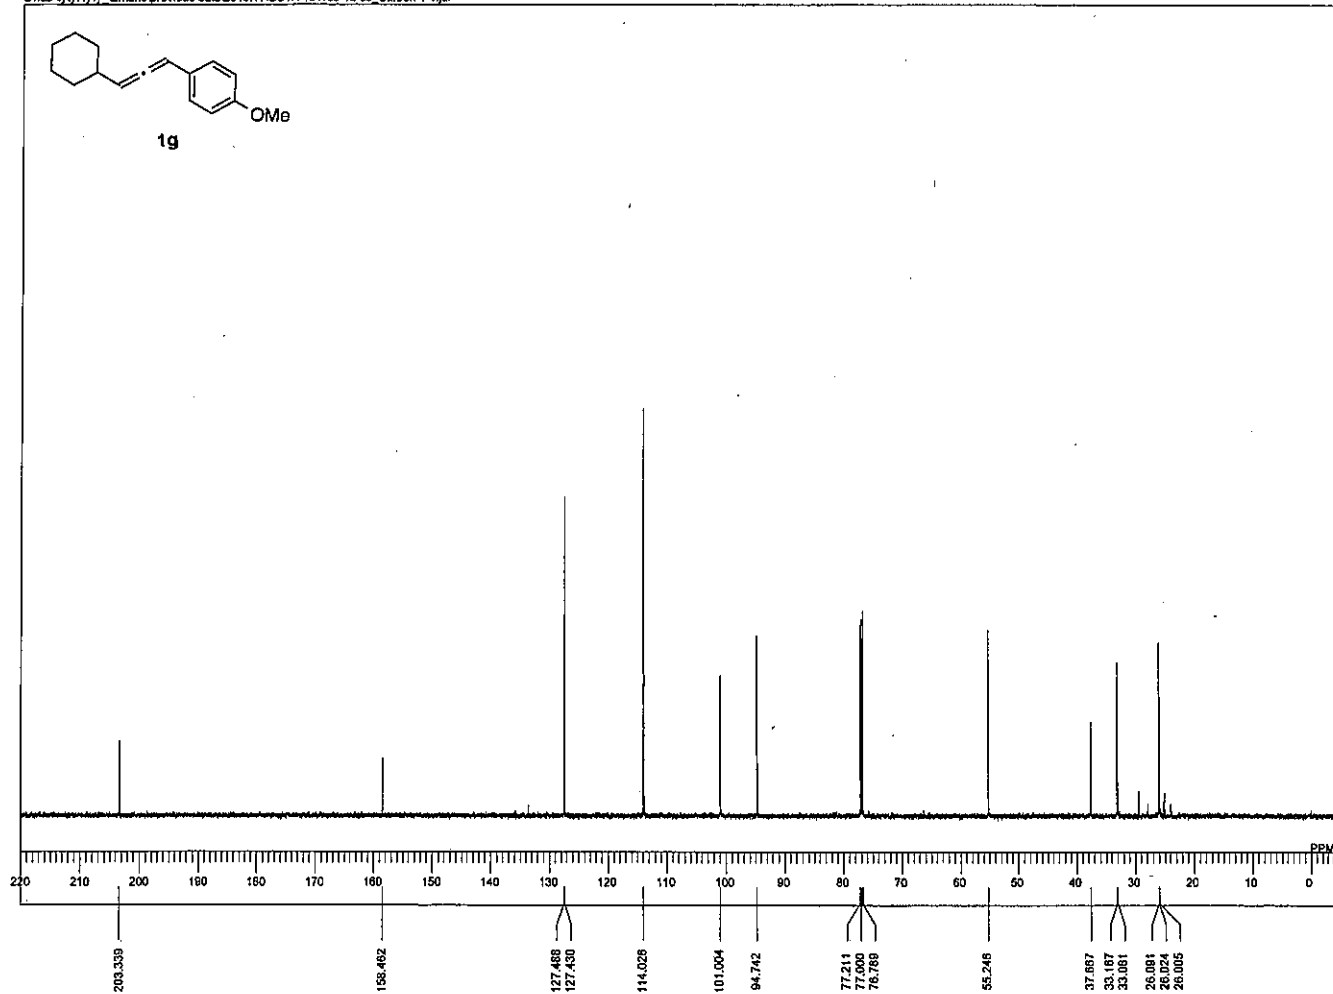

DFILE GSYA-131108-12  
 COMNT single pulse decou  
 DATIM 2013-11-08 16:49  
 OBNUC 13C  
 EXMOD carbon.jxp  
 OBFREQ 150.92 MHz  
 OBSET 6.52 KHz  
 OBFIN 1.74 Hz  
 POINT 32787  
 FREQU 47348.49 Hz  
 SCANS 51  
 ACQTM 0.6921 sec  
 PD 2.0000 sec  
 PW1 3.27 usec  
 IRNUC 13C  
 CTEMP 19.3 c  
 SLVNT CDCL3  
 EXREF 77.00 ppm  
 BF 1.00 Hz  
 RGAIN 50

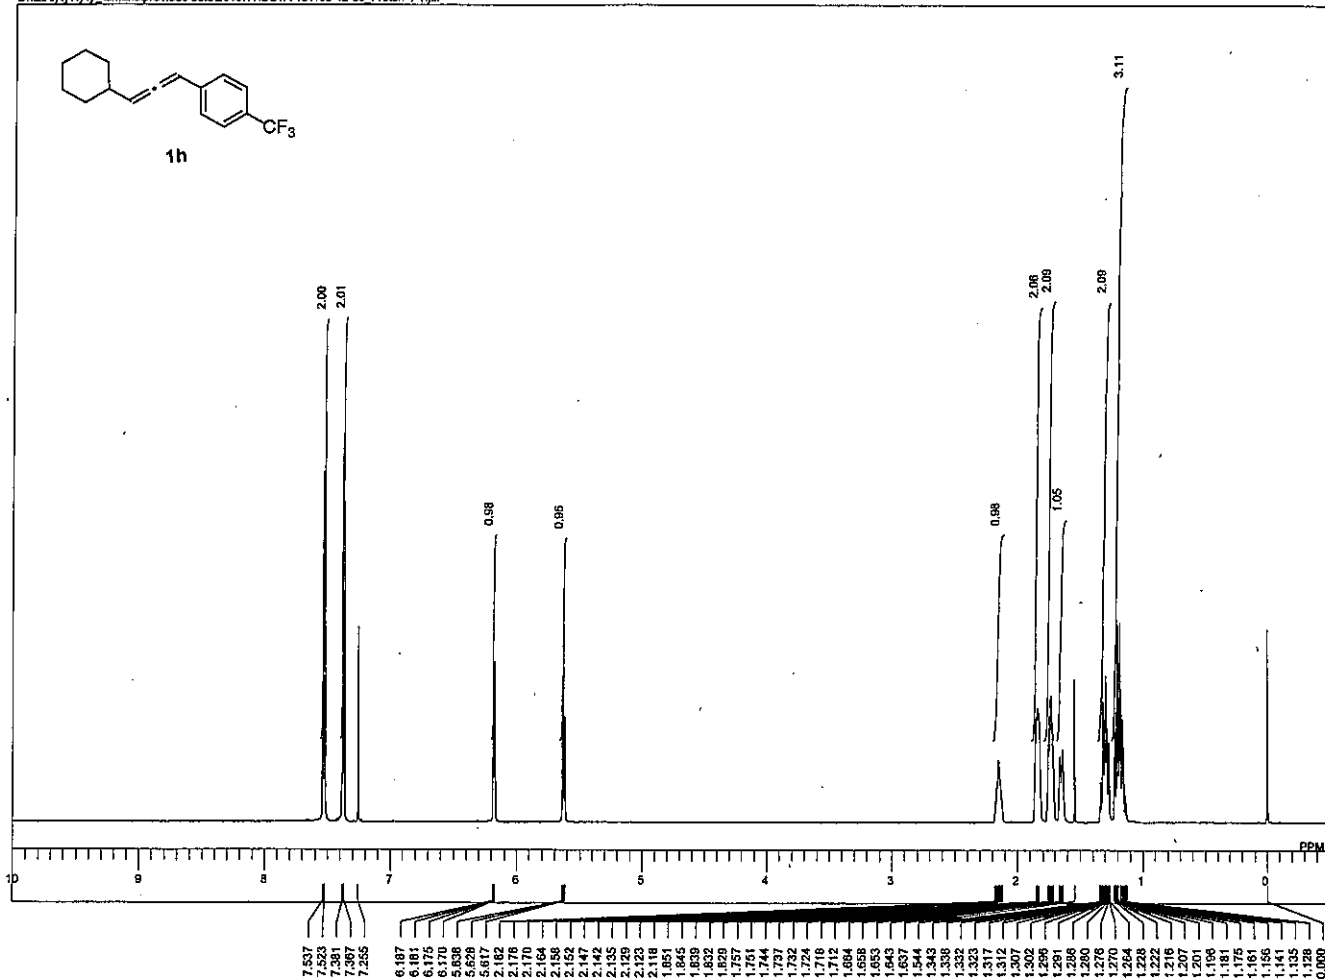

DFILE GSYA-131108-12-  
COMINT single\_pulse  
DATIM 2013-11-08 15:55:  
1H  
OBNUC proton\_jcp  
EXMOD 606.17 MHz  
OBFRQ 5.30 KHz  
OBSET 5.47 Hz  
OBFIN 16384  
POINT 11261.26 Hz  
FREQU 4  
SCANS 1.4549 sec  
ACQTM 5.0000 sec  
PD 6.55 usec  
PWI 1H  
IRNUC 18.8 c  
SLVNT CDCL3  
CTEMP 0.00 ppm  
EXREF 0.12 Hz  
BF 35  
RGAIN

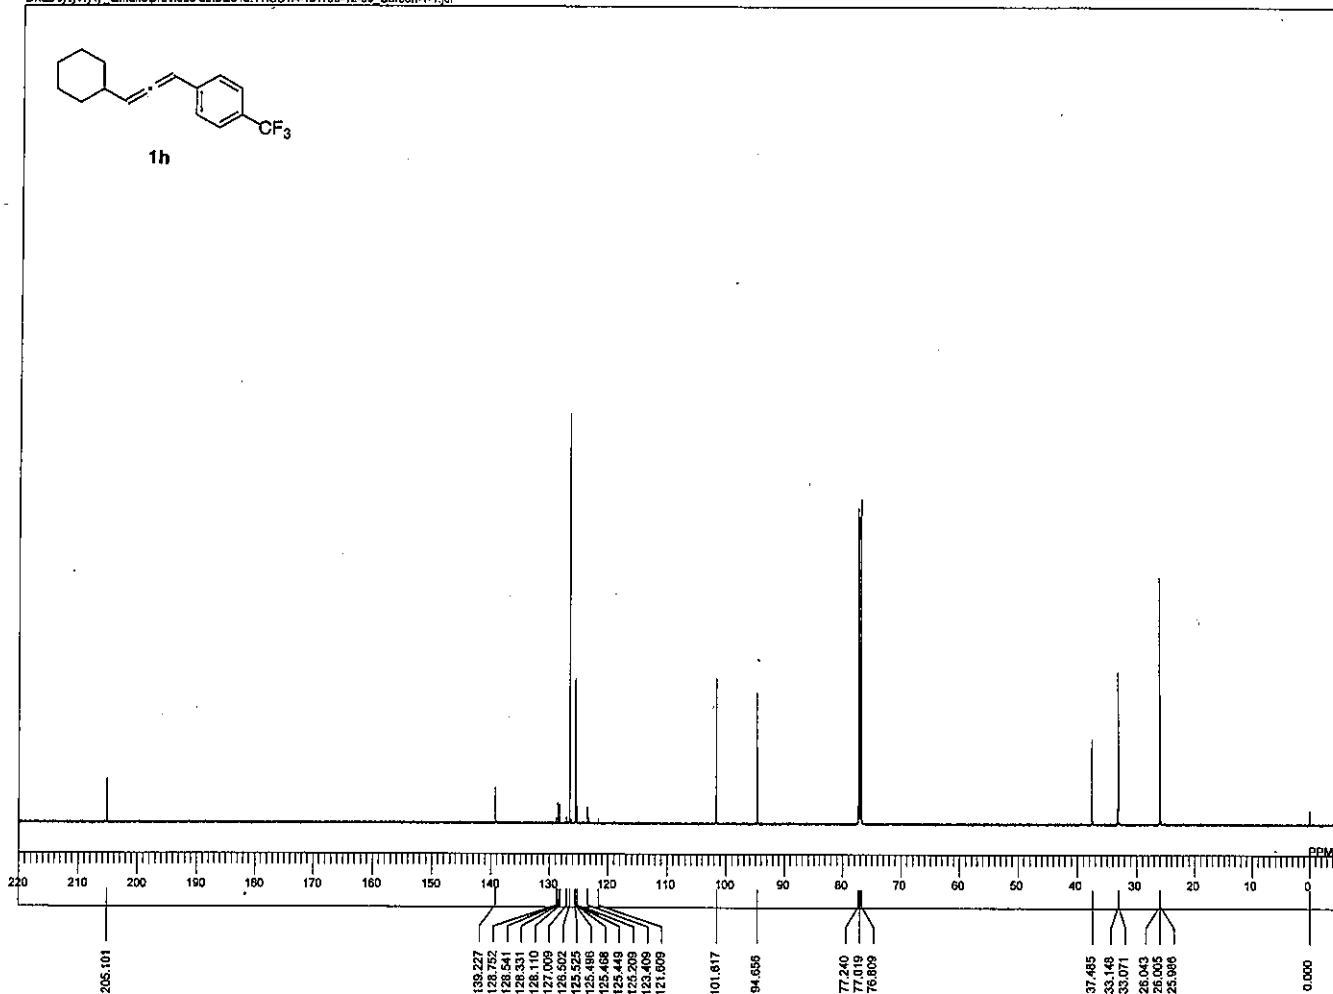

DFILE GSYA-131108-12-  
COMINT single\_pulse\_deco  
DATIM 2013-11-08 15:56:  
13C  
OBNUC carbon\_jcp  
EXMOD 150.92 MHz  
OBFRQ 8.52 KHz  
OBSET 1.74 Hz  
OBFIN 32767  
POINT 47348.48 Hz  
FREQU 1024  
SCANS 0.8921 sec  
ACQTM 2.0000 sec  
PD 3.27 usec  
PWI 1H  
IRNUC 19.4 c  
SLVNT CDCL3  
CTEMP 0.00 ppm  
EXREF 1.00 Hz  
BF 50  
RGAIN

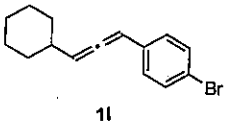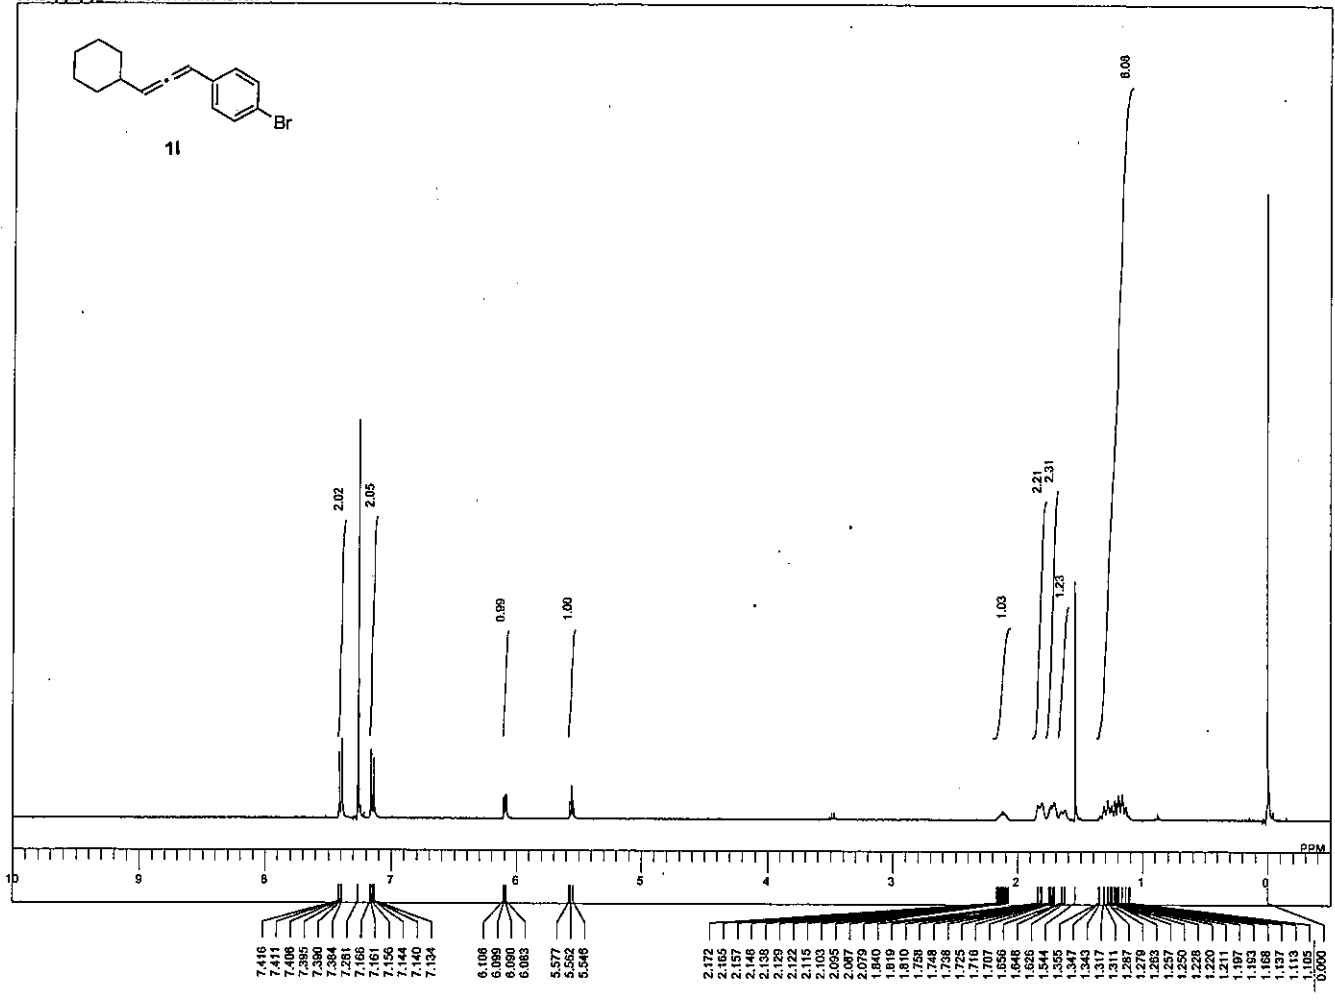

DFILE GSYA-131115-12-  
 COMNT 2013-11-15 15:29:  
 DATIM 1H  
 OBNUC single\_pulse.exp  
 EXMOD 399.78 MHz  
 OBFRQ 4.19 KHz  
 OBSBT 7.29 Hz  
 OBFIN 16384  
 POINT 5988.80 Hz  
 SCANS 4  
 ACQTM 2.7312 sec  
 PD 2.0000 sec  
 PW1 6.00 usec  
 IRNUC 21.2 c  
 CTEMP CDCL3  
 SLVNT 0.00 ppm  
 EXREF 0.12 Hz  
 BF 20  
 RGAIN

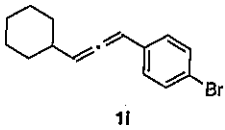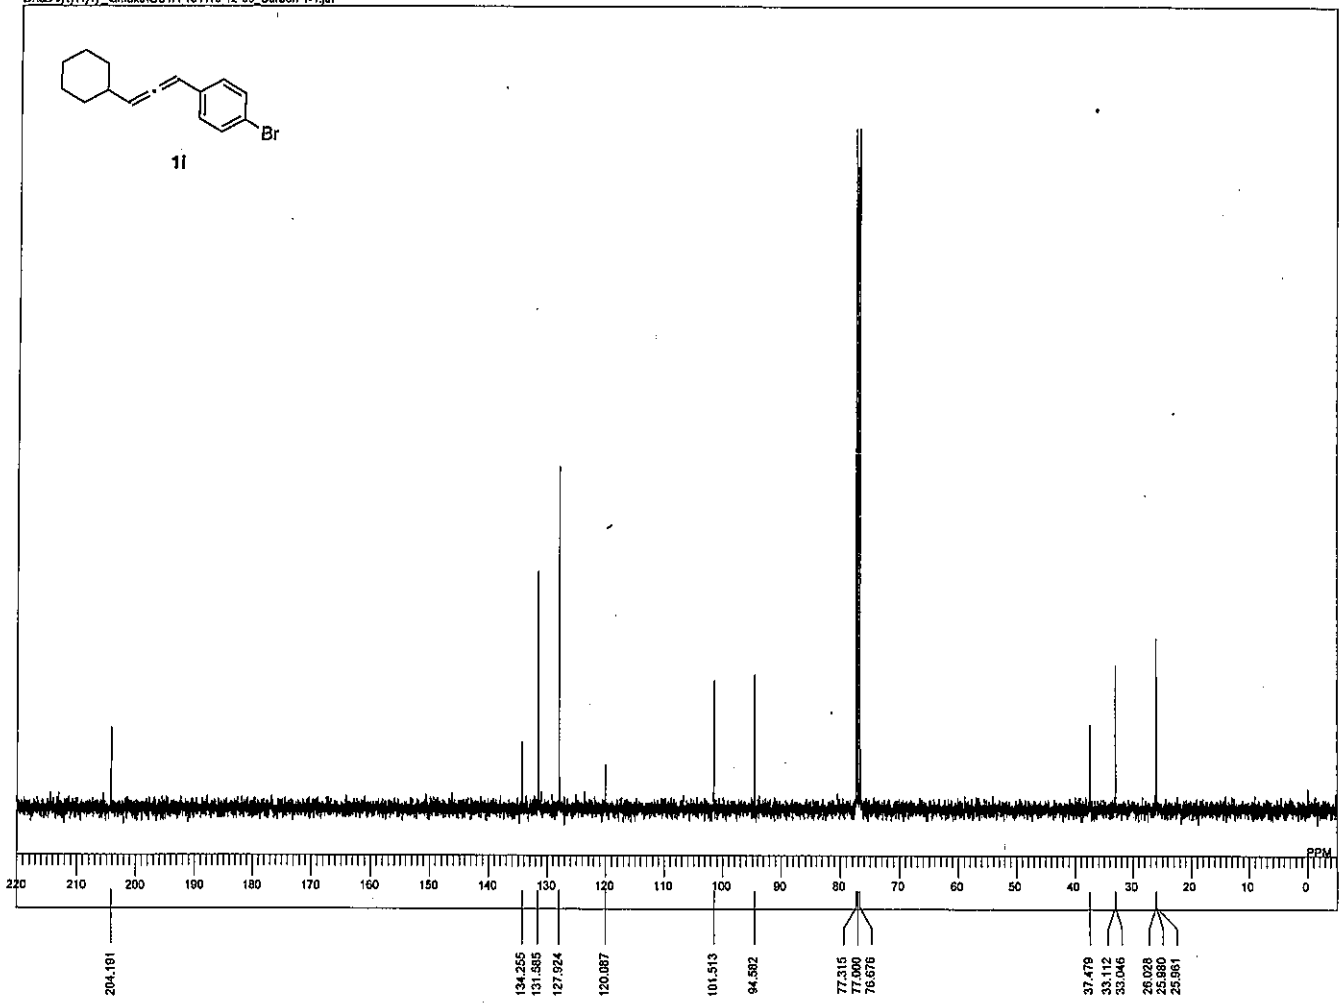

DFILE GSYA-131115-12-  
 COMNT single\_pulse\_decou  
 DATIM 2013-11-15 20:43:  
 OBNUC 13C  
 EXMOD carbon\_jcp  
 OBFRQ 100.53 MHz  
 OBSBT 5.35 KHz  
 OBFIN 5.96 KHz  
 POINT 32767  
 FREQU 31407.04 Hz  
 SCANS 84  
 ACQTM 1.0433 sec  
 PD 2.0000 sec  
 PW1 3.02 usec  
 IRNUC 1H  
 CTEMP 19.4 c  
 SLVNT CDCL3  
 EXREF 77.00 ppm  
 BF 1.00 Hz  
 RGAIN 50

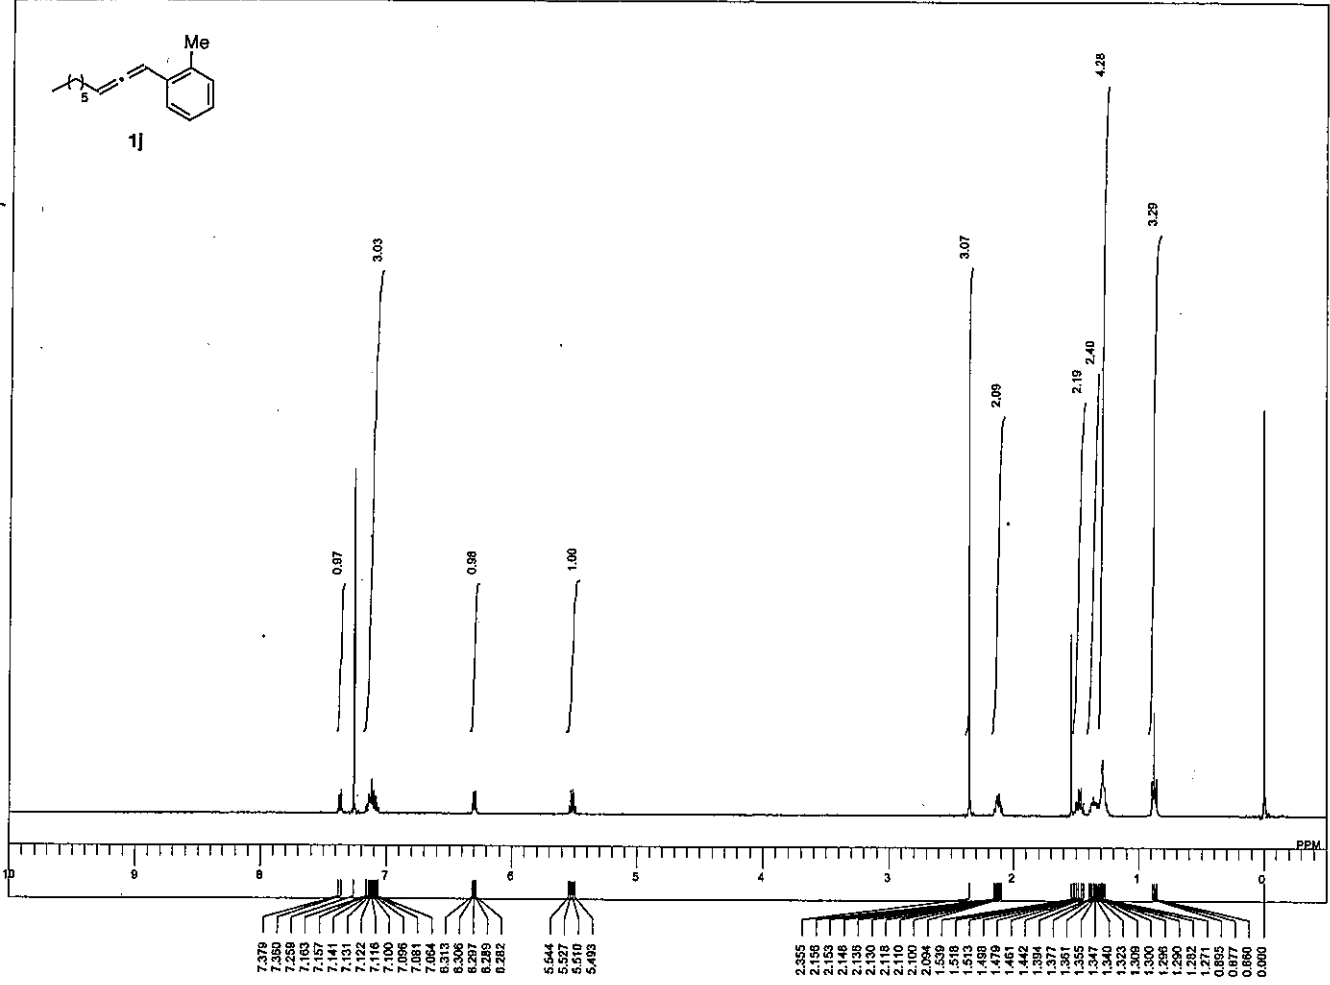

DFILE GSYA-131112-12-  
 COMNT  
 DATIM 2013-11-12 12:28:  
 OBNUC 1H  
 EXMOD single\_pulse\_exp  
 OBFREQ 399.76 MHz  
 OBSET 4.18 KHz  
 OBFIN 7.29 Hz  
 POINT 16384  
 FREQ 5998.60 Hz  
 SCANS 4  
 ACQTM 2.7312 sec  
 PD 2.0000 sec  
 PW1 6.00 usec  
 IRNUC  
 CTEMP 22.5 c  
 SLVNT CDCL3  
 EXREF 0.00 ppm  
 BF 0.12 Hz  
 RGAIN 19

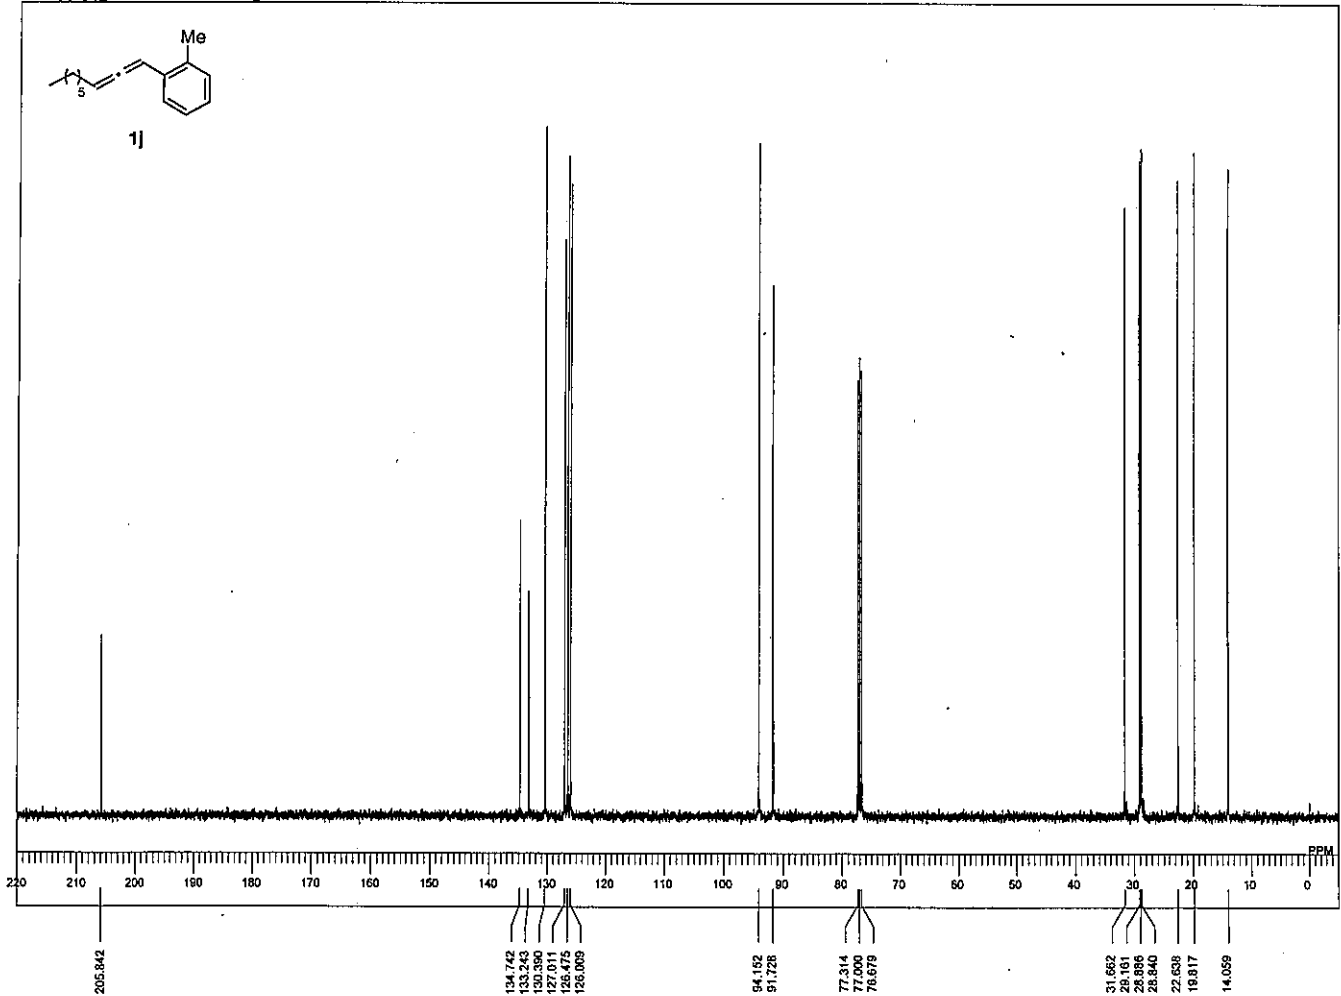

DFILE GSYA-131113-12-  
 COMNT  
 DATIM 2013-11-13 20:41:  
 OBNUC 13C  
 EXMOD single\_pulse\_dec  
 OBFREQ 100.63 MHz  
 OBSET 5.35 KHz  
 OBFIN 5.88 Hz  
 POINT 32768  
 FREQ 25188.92 Hz  
 SCANS 863  
 ACQTM 1.3009 sec  
 PD 1.0000 sec  
 PW1 3.17 usec  
 IRNUC  
 CTEMP 23.2 c  
 SLVNT CDCL3  
 EXREF 77.00 ppm  
 BF 1.00 Hz  
 RGAIN 24

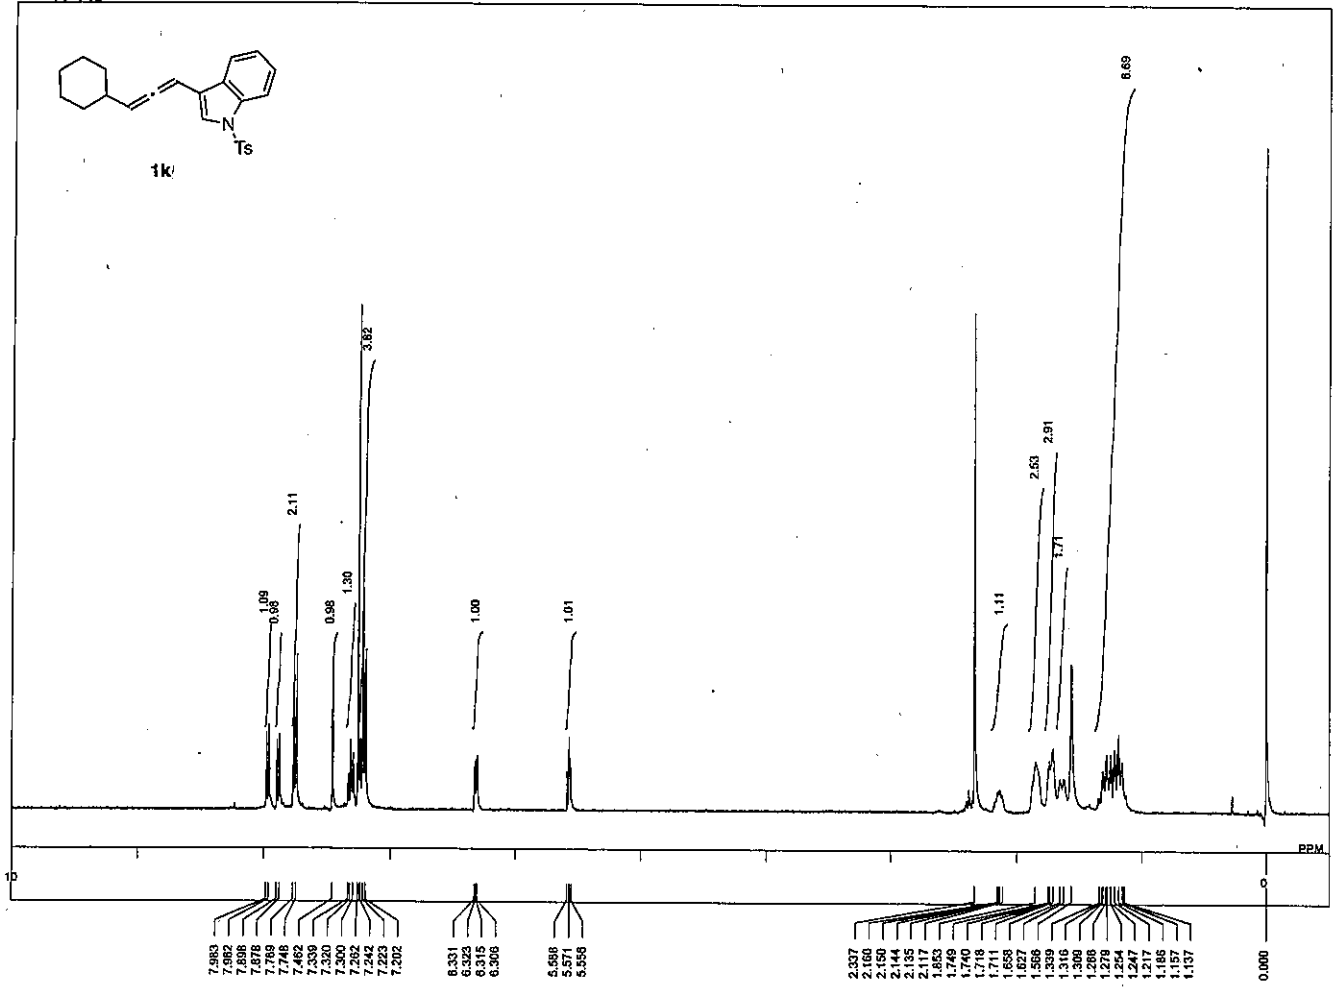

DFILE GSYA-140927-Ts  
 COMNT 2014-09-27 16:42  
 DATIM single\_pulse.exp  
 OBNUC 1H  
 EXMOD 399.78 MHz  
 OBFRQ 4.19 KHz  
 OBSET 7.20 Hz  
 PPOINT 16384  
 FREQU 5998.80 Hz  
 SCANS 4  
 ACQTM 2.7312 sec  
 PD 2.0000 sec  
 PW1 5.75 usec  
 IRNUC  
 CTEMP 20.7 c  
 SLVNT CDCL3  
 EXREF 0.00 ppm  
 BF 0.12 Hz  
 RGAIN 17

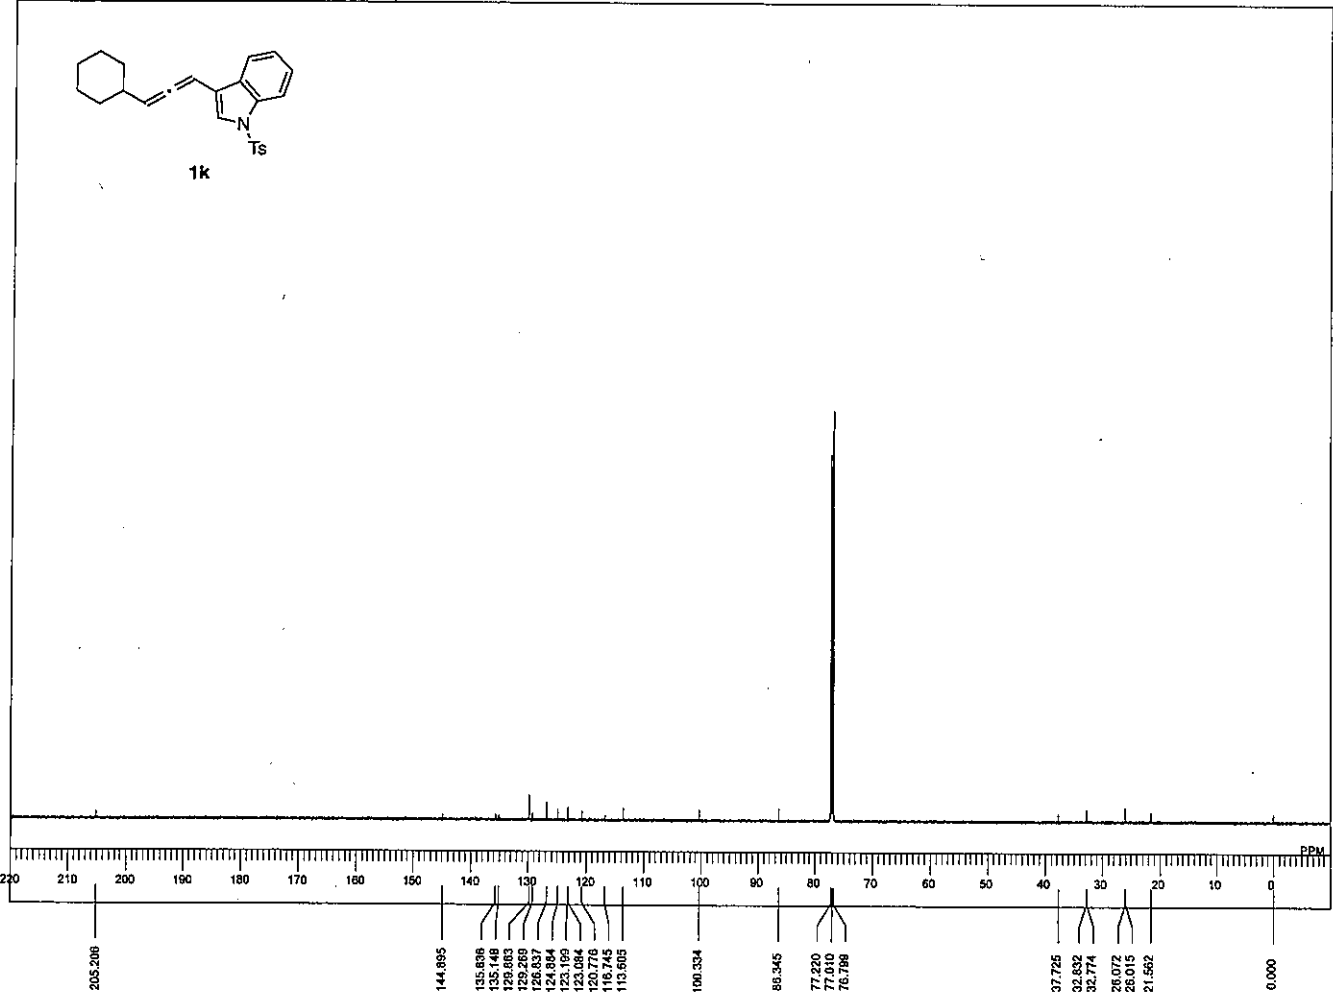

DFILE GSYA-140929-Ts  
 COMNT single\_pulse\_deco  
 DATIM 2014-09-29 12:01  
 OBNUC 13C  
 EXMOD carbon.jcp  
 OBFRQ 150.92 MHz  
 OBSET 8.52 KHz  
 OBFIN 1.74 Hz  
 POINT 32767  
 FREQU 47348.49 Hz  
 SCANS 2400  
 ACQTM 0.6921 sec  
 PD 2.0000 sec  
 PW1 3.27 usec  
 IRNUC 1H  
 CTEMP 21.2 c  
 SLVNT CDCL3  
 EXREF 0.00 ppm  
 BF 1.00 Hz  
 RGAIN 50





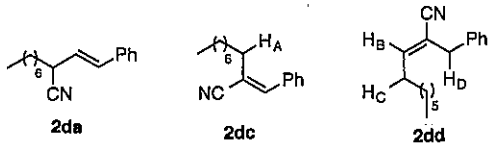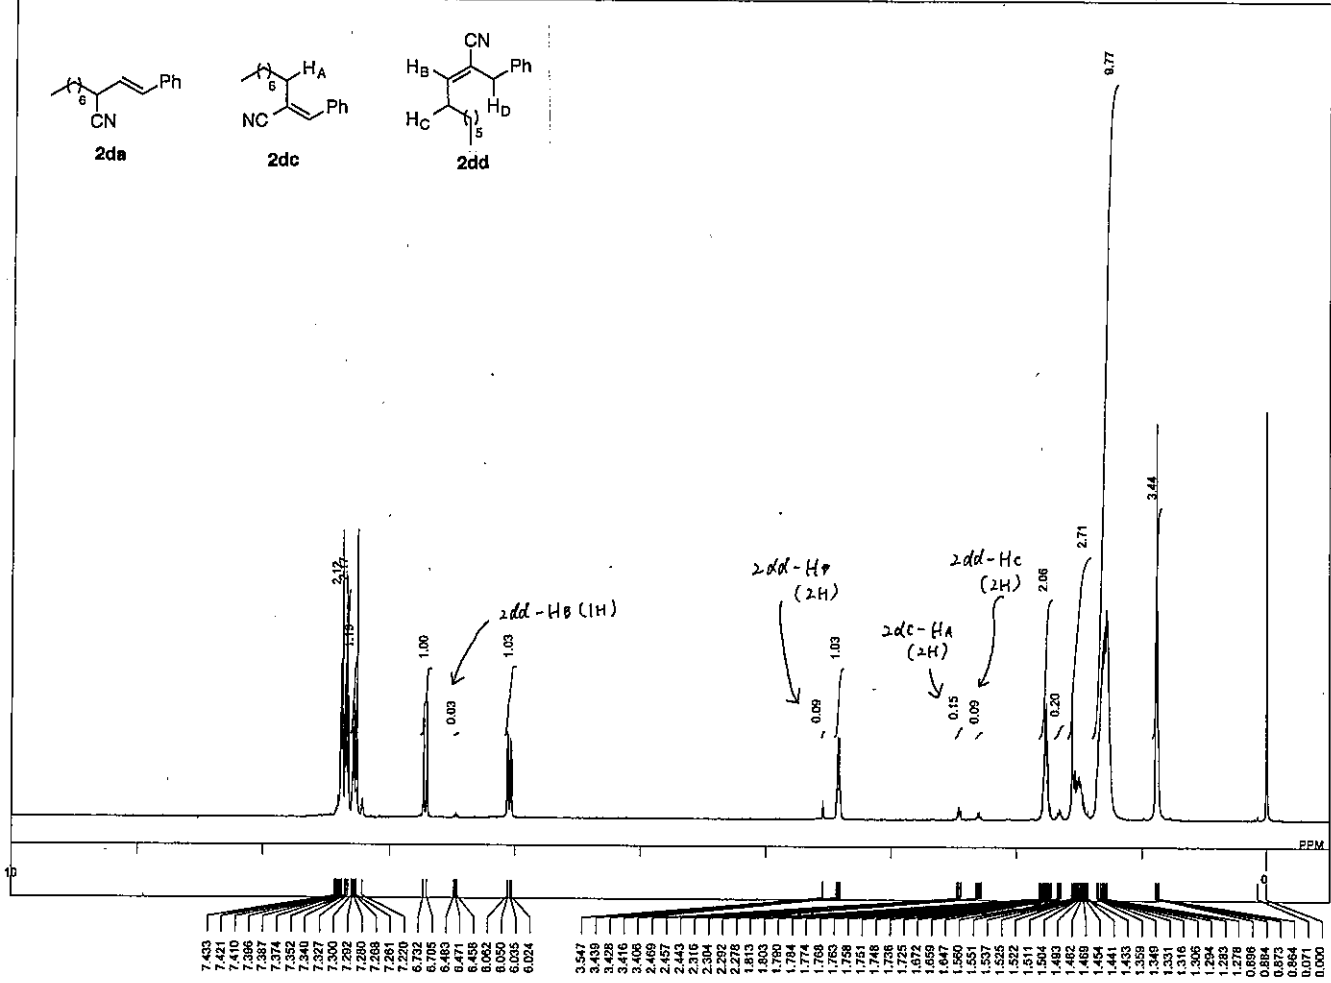

DFILE GSYA-131105-12  
COMNT single\_pulse  
DATIM 2013-11-05 12:39  
OBNUC 1H  
EXMOD proton.jxp  
QBFRQ 600.17 MHz  
QBSET 5.33 KHz  
OBFIN 5.47 Hz  
POINT 16384  
FREQU 11261.26 Hz  
SCANS 4  
ACQTM 1.4549 sec  
PD 5.0000 sec  
PWI 6.55 usec  
IRNUC 1H  
CTEMP 18.3 c  
SLVNT CDCL3  
EXREF 0.00 ppm  
BF 1.00 Hz  
RGAIN 44

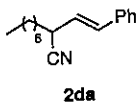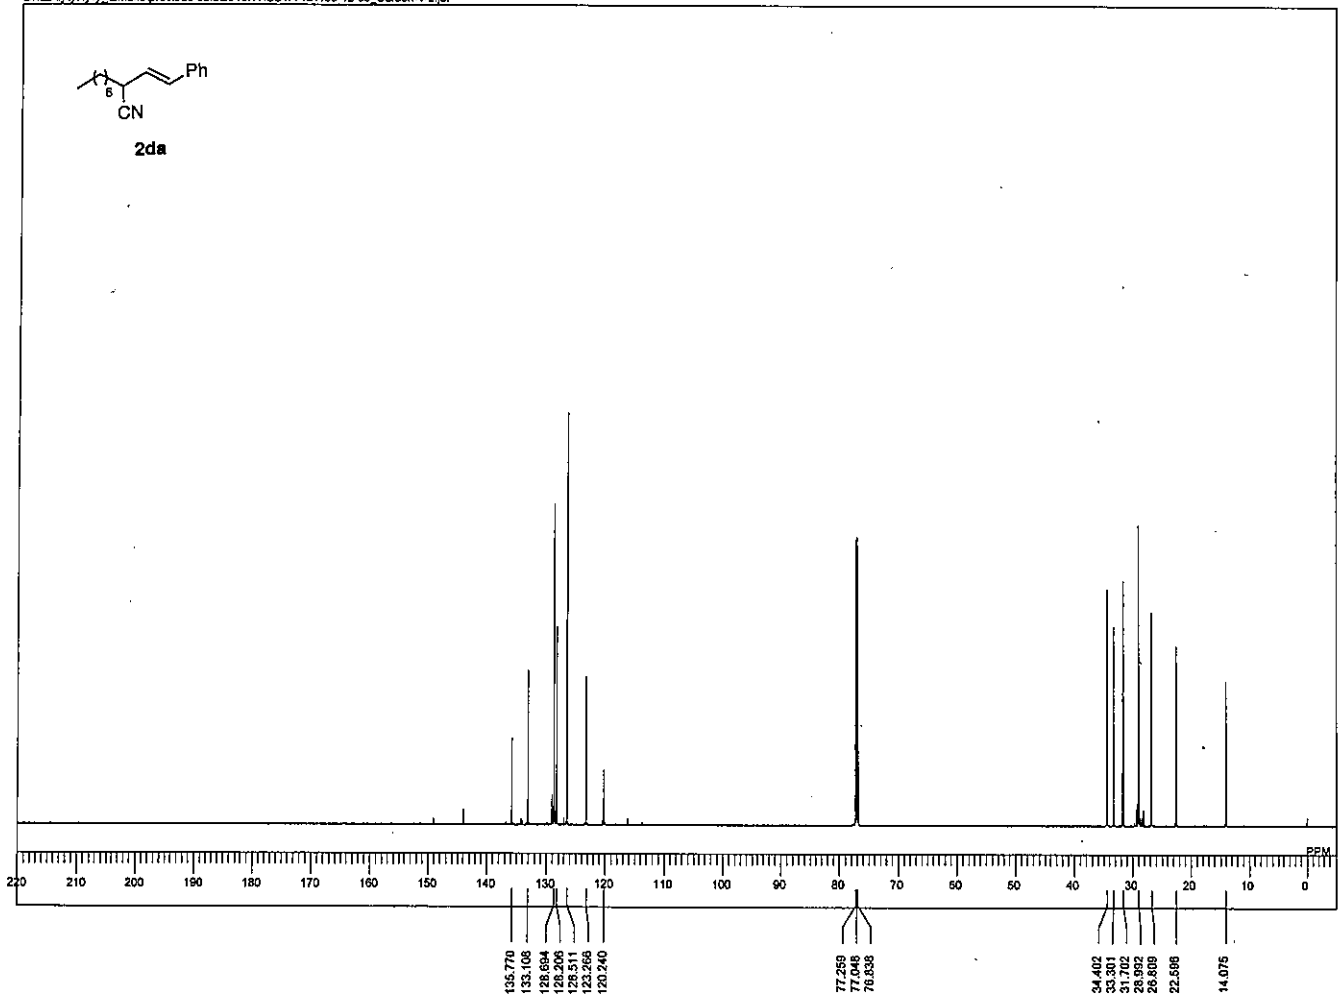

DFILE GSYA-131105-12  
COMNT single\_pulse\_decou  
DATIM 2013-11-06 05:07  
OBNUC 13C  
EXMOD carbon.jxp  
QBFRQ 150.93 MHz  
QBSET 8.52 KHz  
OBFIN 1.74 Hz  
POINT 32767  
FREQU 47348.49 Hz  
SCANS 4900  
ACQTM 0.6921 sec  
PD 2.0000 sec  
PWI 3.27 usec  
IRNUC 1H  
CTEMP 19.4 c  
SLVNT CDCL3  
EXREF 0.00 ppm  
BF 1.00 Hz  
RGAIN 50

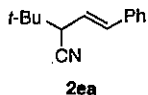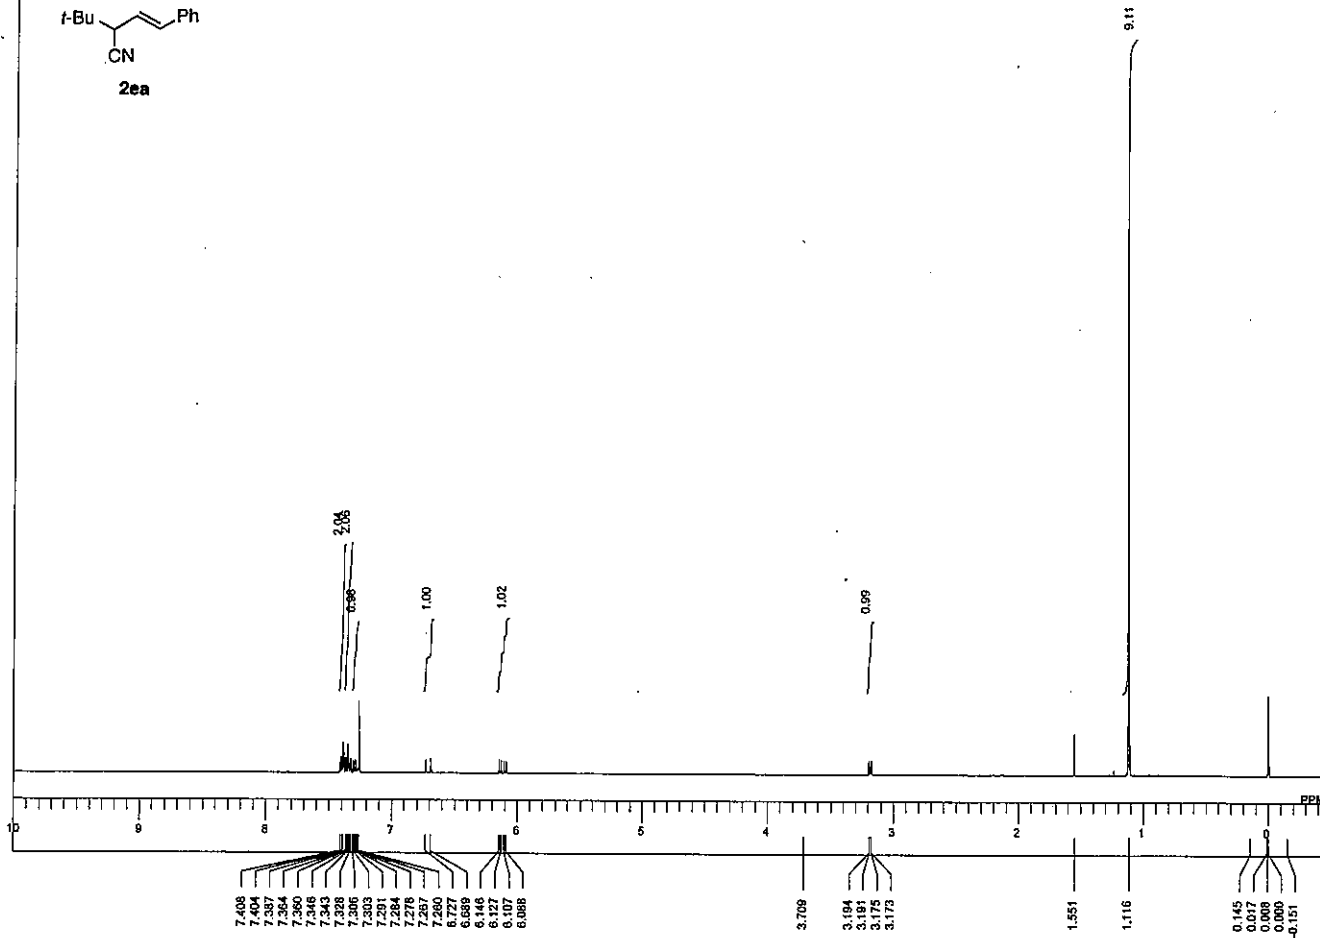

DFILE GSYA-131121-12-  
COMNT single\_pulse  
DATIM 2013-11-21 19:00  
OBNUC 1H  
EXMOD proton\_jxp  
OBFRO 399.76 MHz  
OBSET 4.18 KHz  
OBFIN 7.29 Hz  
POINT 15384  
FREQU 7503.00 Hz  
SCANS 4  
ACQTM 2.1837 sec  
PD 5.0000 sec  
PWI 5.01 usec  
IRNUC 1H  
CTEMP 20.4 c  
SLVNT CDCL3  
EXREF 0.00 ppm  
BF 0.12 Hz  
RGAIN 50

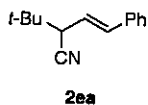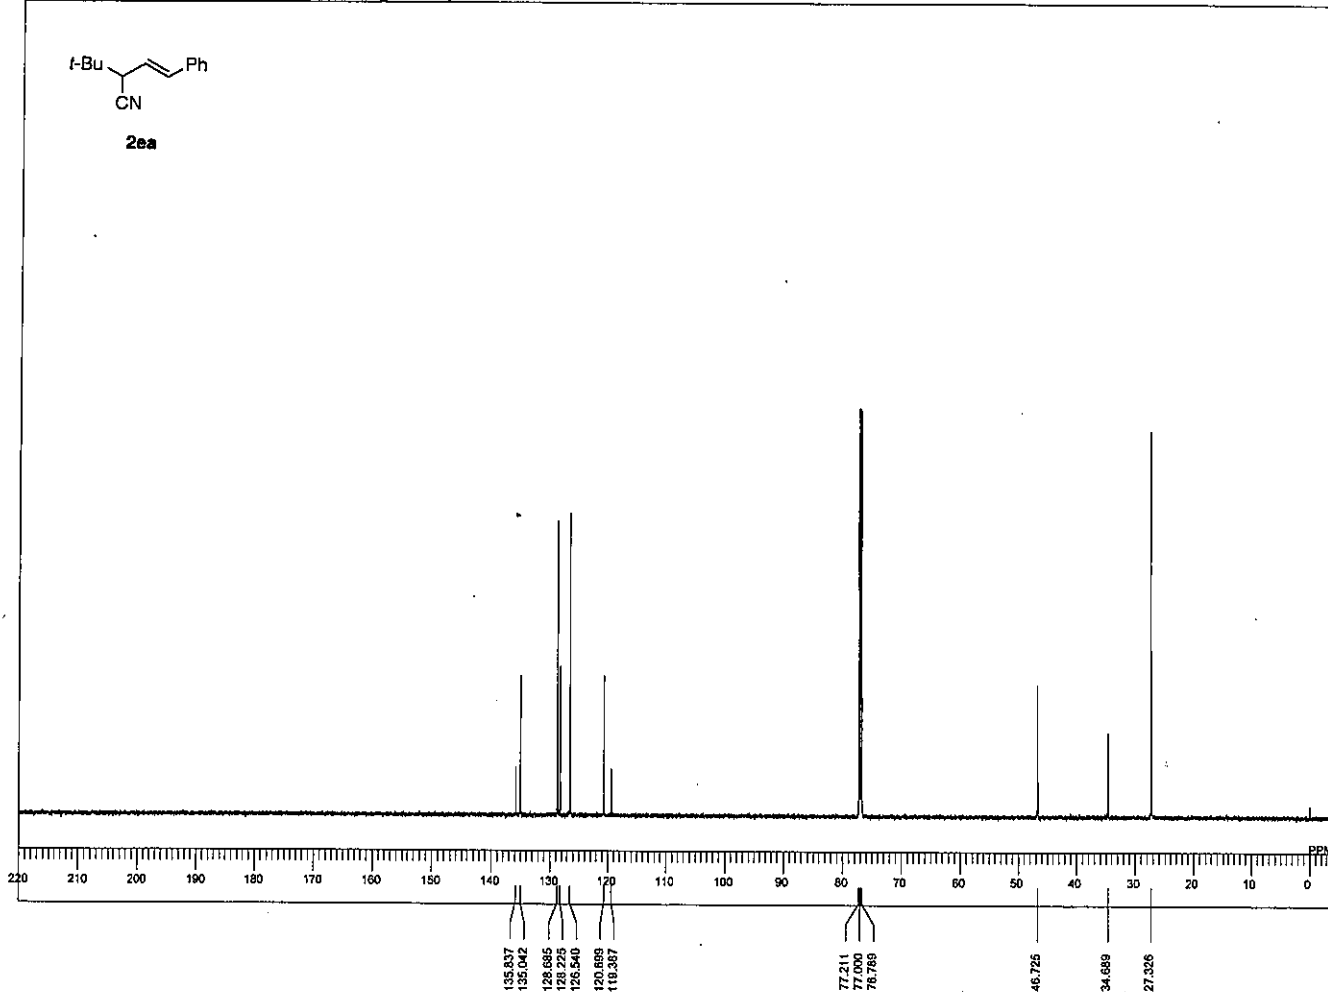

DFILE GSYA-131202-IBu-  
COMNT single\_pulse decou  
DATIM 2013-12-02 17:02  
OBNUC 13C  
EXMOD carbon\_jxp  
OBFRO 150.82 MHz  
OBSET 8.52 KHz  
OBFIN 1.74 Hz  
POINT 32767  
FREQU 47346.49 Hz  
SCANS 1024  
ACQTM 0.6921 sec  
PD 2.0000 sec  
PWI 3.27 usec  
IRNUC 1H  
CTEMP 19.5 c  
SLVNT CDCL3  
EXREF 77.00 ppm  
BF 1.00 Hz  
RGAIN 50

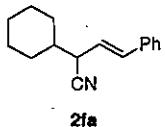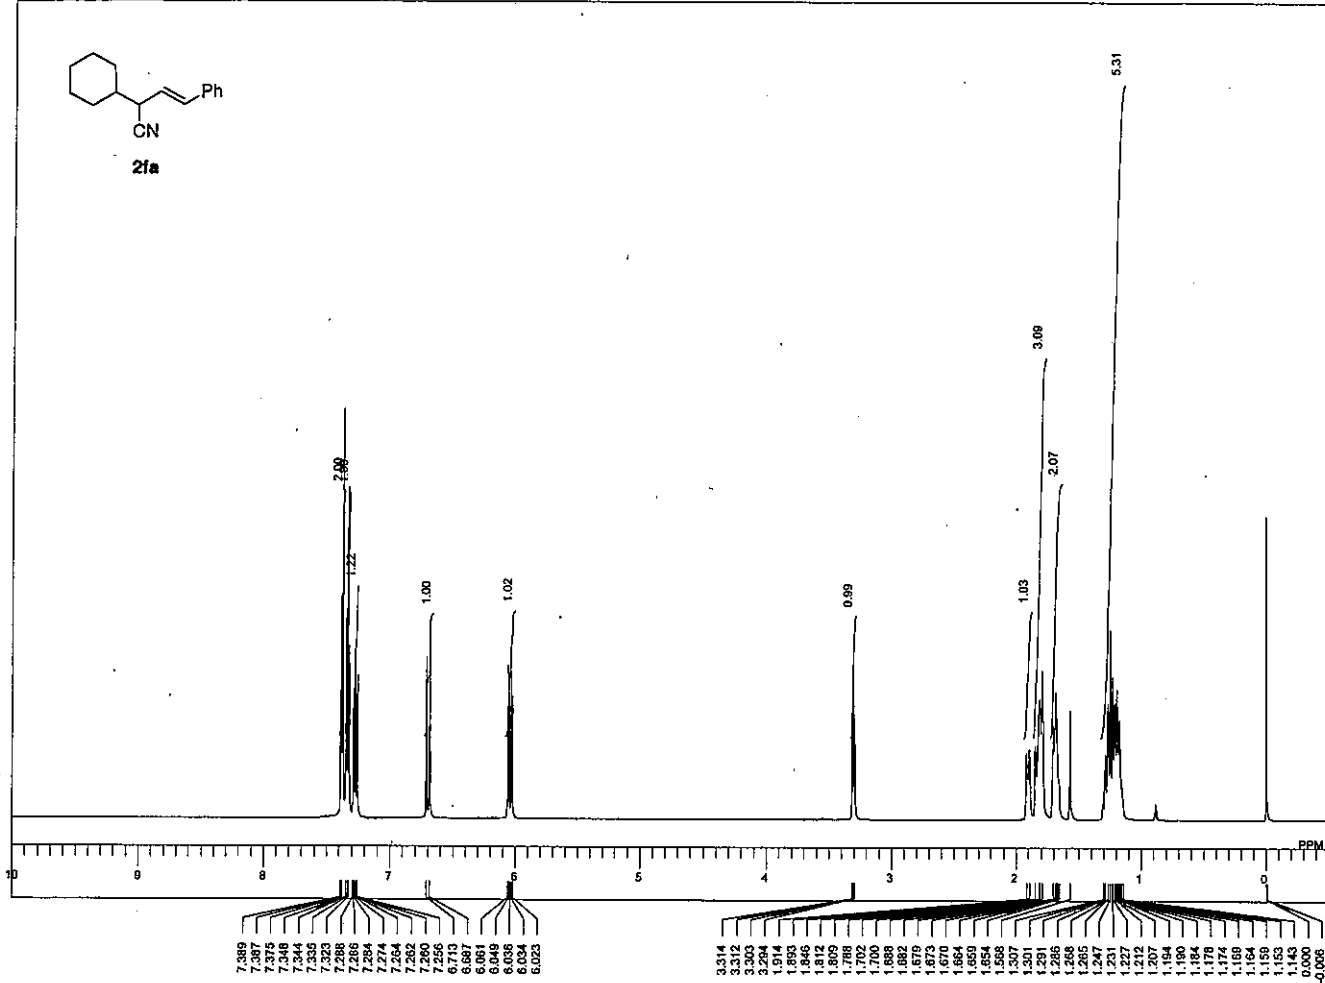

DFILE GSYA-131010-12-  
COMNT single\_pulse  
DATIM 2013-10-10 12:17:  
OBNUC 1H  
EXMOD proton.jcp  
OBFRO 600.17 MHz  
OBSET 5.30 KHz  
OBFIN 5.47 Hz  
POINT 16384  
FREQU 11261.26 Hz.  
SCANS 4  
ACQTM 1.4549 sec  
PD 5.0000 sec  
PWI 6.55 usec  
IRNUC 1H  
CTEMP 20.5 c  
SLVNT CDCL3  
EXREF 0.00 ppm  
BF 0.12 Hz  
RGAIN 40

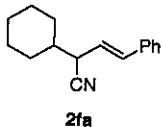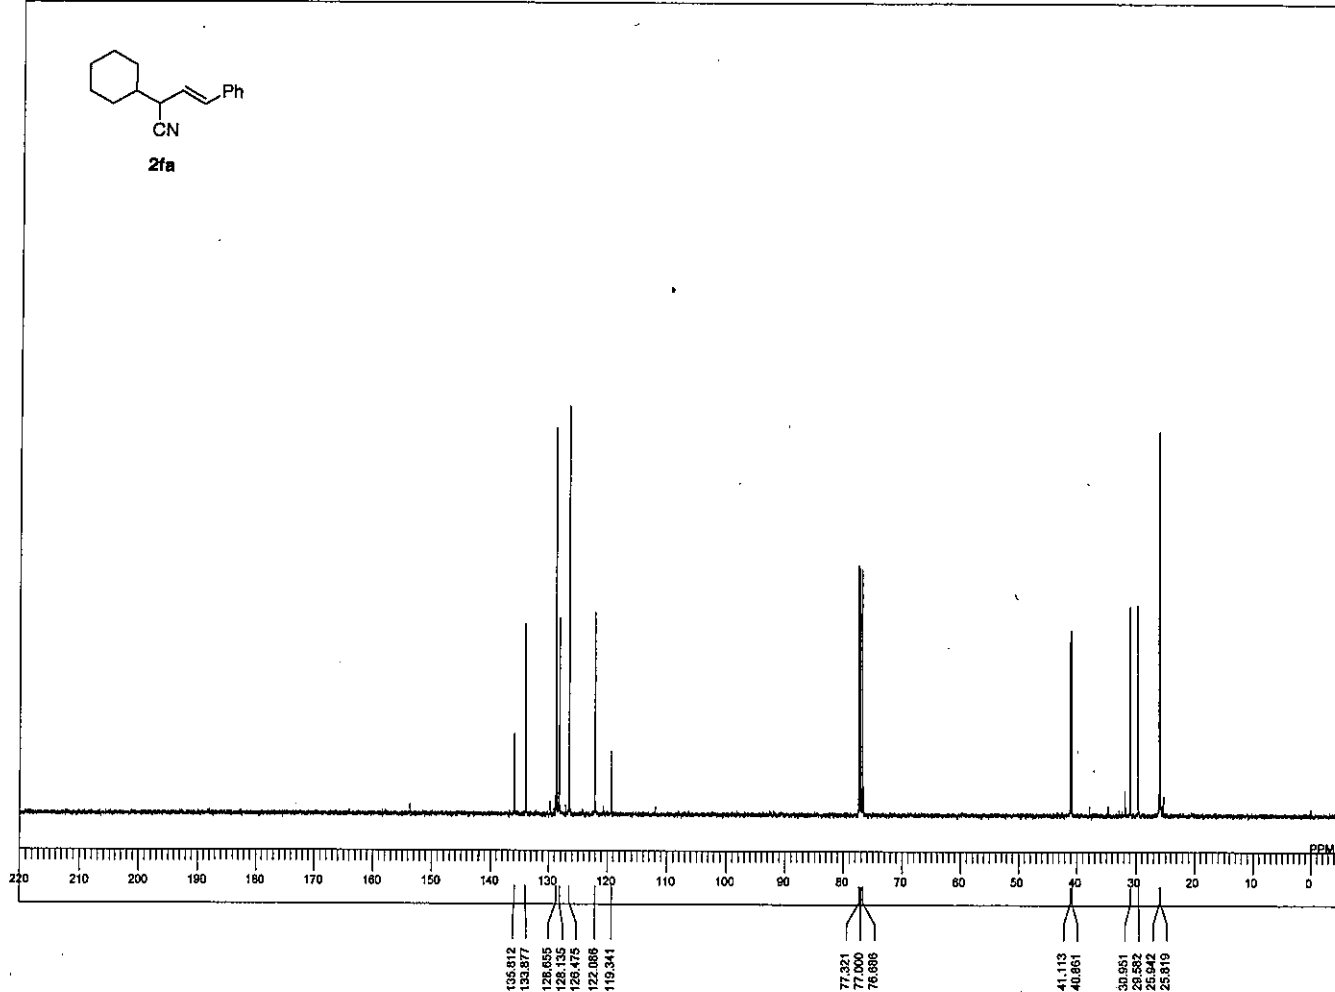

DFILE GSYA-131004-12-  
COMNT 13C  
DATIM 2013-10-04 11:12:  
OBNUC 13C  
EXMOD single\_pulse\_dec  
OBFRO 100.53 MHz  
OBSET 5.35 KHz  
OBFIN 5.86 Hz  
POINT 32768  
FREQU 25188.92 Hz  
SCANS 1000  
ACQTM 1.3009 sec  
PD 1.0000 sec  
PWI 3.17 usec  
IRNUC 1H  
CTEMP 24.1 c  
SLVNT CDCL3  
EXREF 77.00 ppm  
BF 1.00 Hz  
RGAIN 24

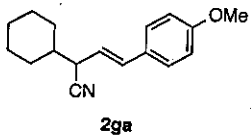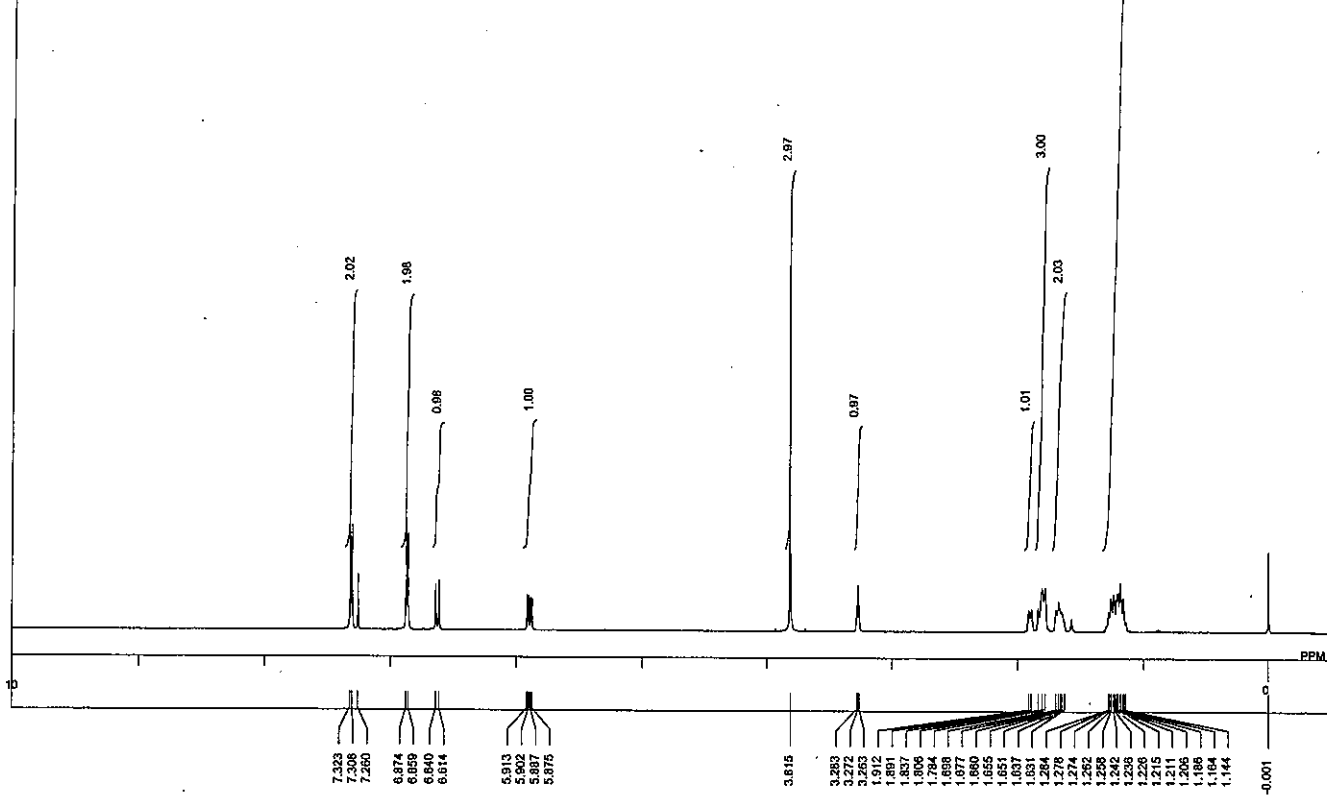

D:\CEA\1\H\1\ lamakol\previous data\2013.11\GSYA-131111-12-55\_Proton-1-1.jf  
 D:\CEA\1\H\1\ lamakol\previous data\2013.11\GSYA-131111-12-55\_Proton-1-1.jf  
 COMNT single\_pulse  
 DATIM 2013-11-11 15:12:  
 OBNUC 1H  
 EXMOD proton.jxp  
 OBFREQ 600.17 MHz  
 OBSET 5.30 KHz  
 OBFIN 5.47 Hz  
 POINT 15384  
 FREQU 11281.28 Hz  
 SCANS 4  
 ACQTM 1.4549 sec  
 PD 5.0000 sec  
 IRNUC 1H  
 CTEMP 18.5 c  
 SLVNT CDCL3  
 EXREF 7.26 ppm  
 BF 0.12 Hz  
 RGAIN 40

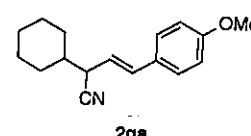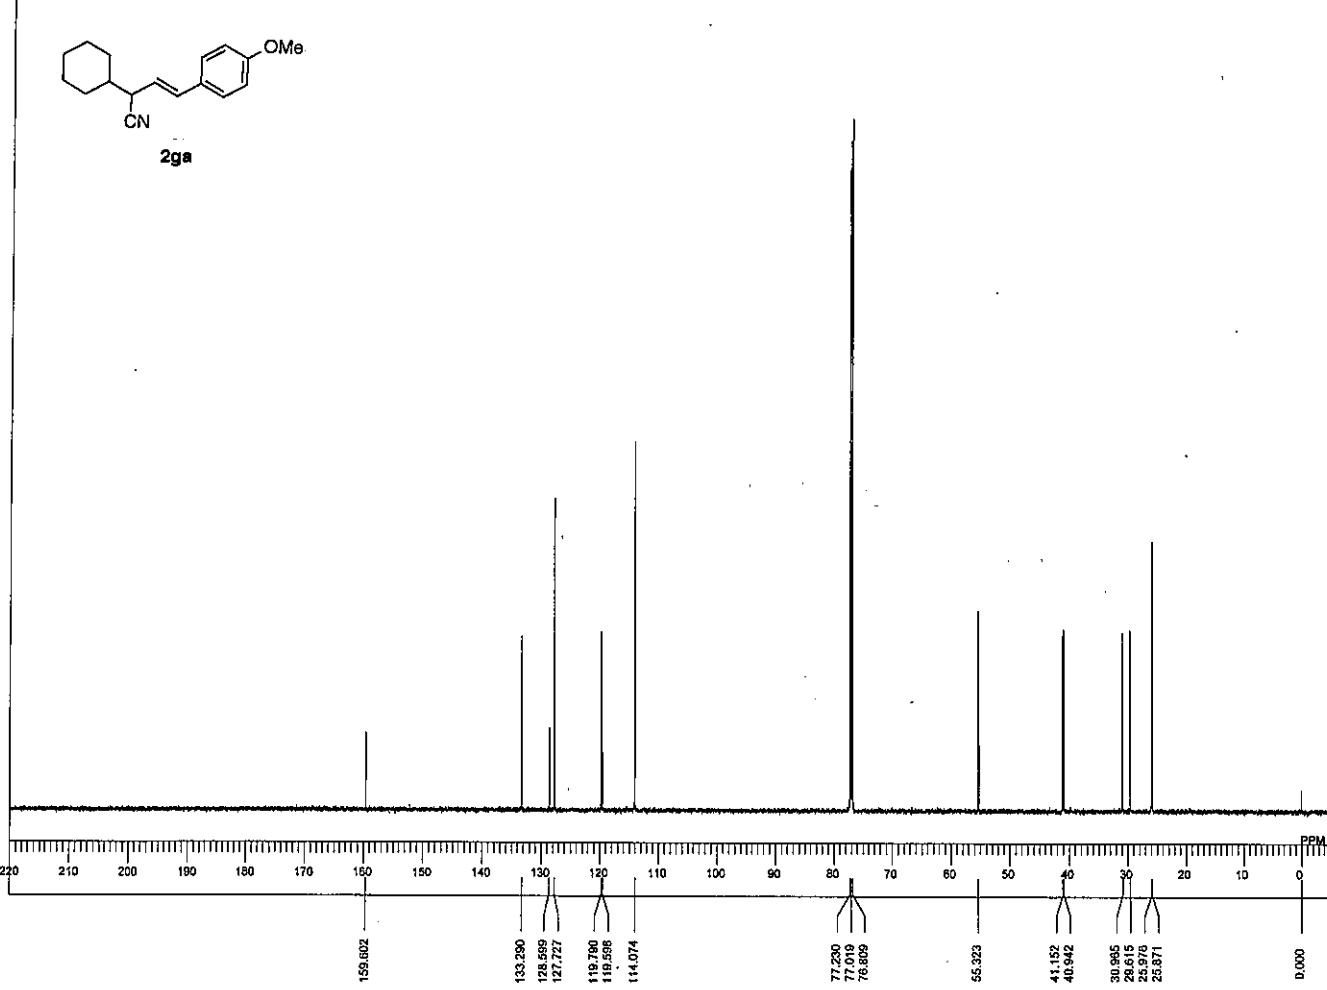

D:\CEA\1\H\1\ lamakol\GSYA-131111-12-55\_Carbon-1-1.jf  
 D:\CEA\1\H\1\ lamakol\GSYA-131111-12-55\_Carbon-1-1.jf  
 COMNT single\_pulse decou  
 DATIM 2013-11-11 15:13:  
 OBNUC 13C  
 EXMOD carbon.jxp  
 OBFREQ 150.92 MHz  
 OBSET 8.62 KHz  
 OBFIN 1.74 Hz  
 POINT 32767  
 FREQU 47348.49 Hz  
 SCANS 819  
 ACQTM 0.6921 sec  
 PD 2.0000 sec  
 IRNUC 13C  
 CTEMP 19.4 c  
 SLVNT CDCL3  
 EXREF 0.00 ppm  
 BF 1.00 Hz  
 RGAIN 50



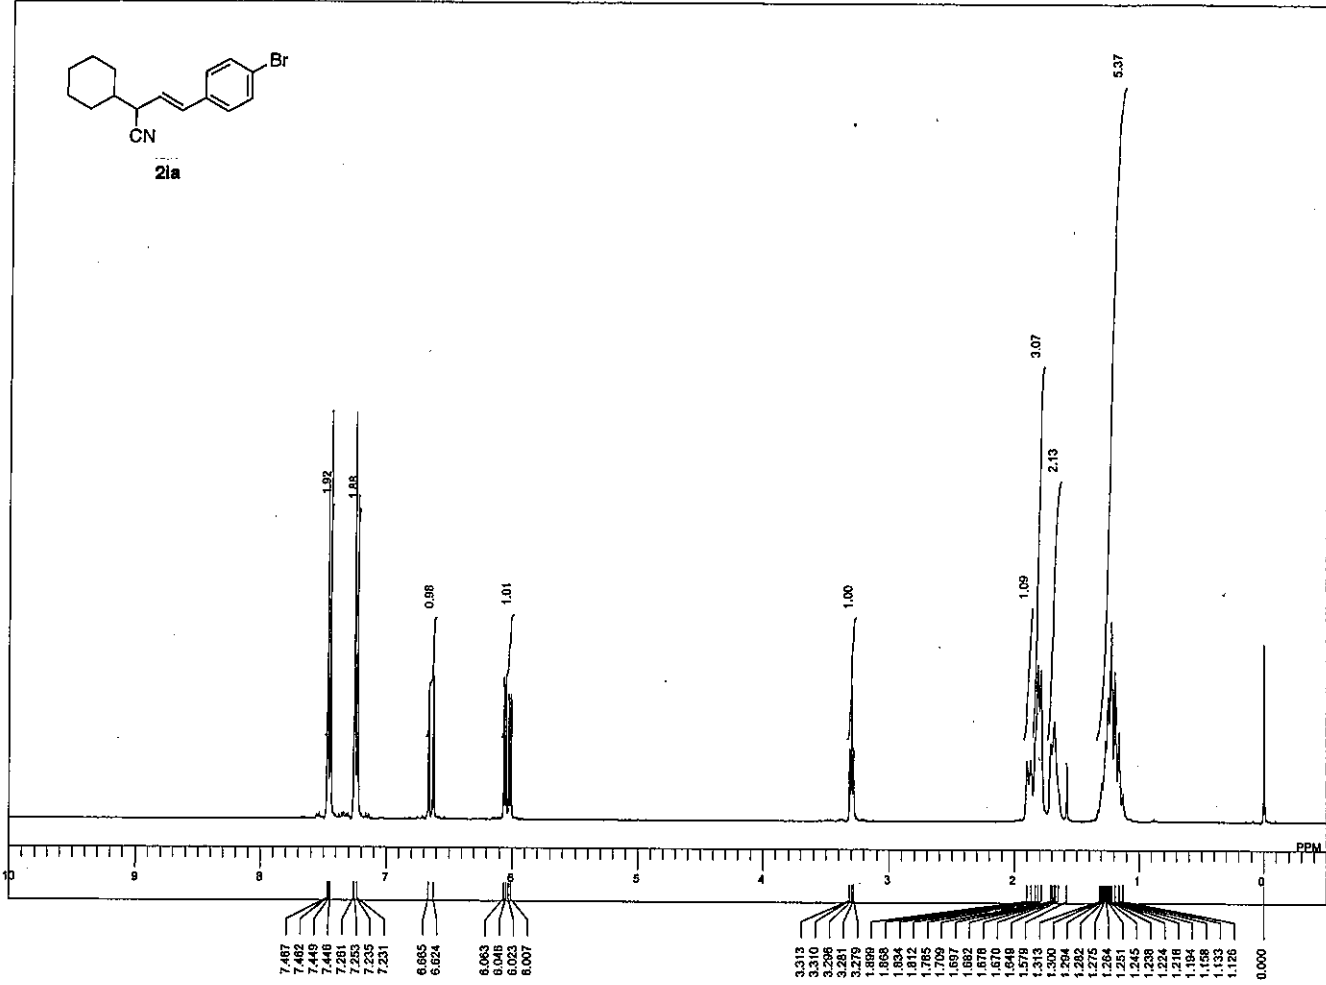

DFILE GSYA-140211-Br  
COMNT  
DATIM 2014-02-11 14:58  
OBNUC 1H  
EXMOD single\_pulse\_exp  
OBFRQ 399.76 MHz  
OBSETE 4.19 KHz  
OBFIN 7.28 Hz  
POINT 16384  
FREQU 5998.80 Hz  
SCANS 4  
ACQTM 2.7312 sec  
PD 2.0000 sec  
PWI 8.00 usec  
IRNUC  
CTEMP 19.8 c  
SLVNT CDCL3  
EXREF 0.00 ppm  
BF 0.12 Hz  
RGAIN 11

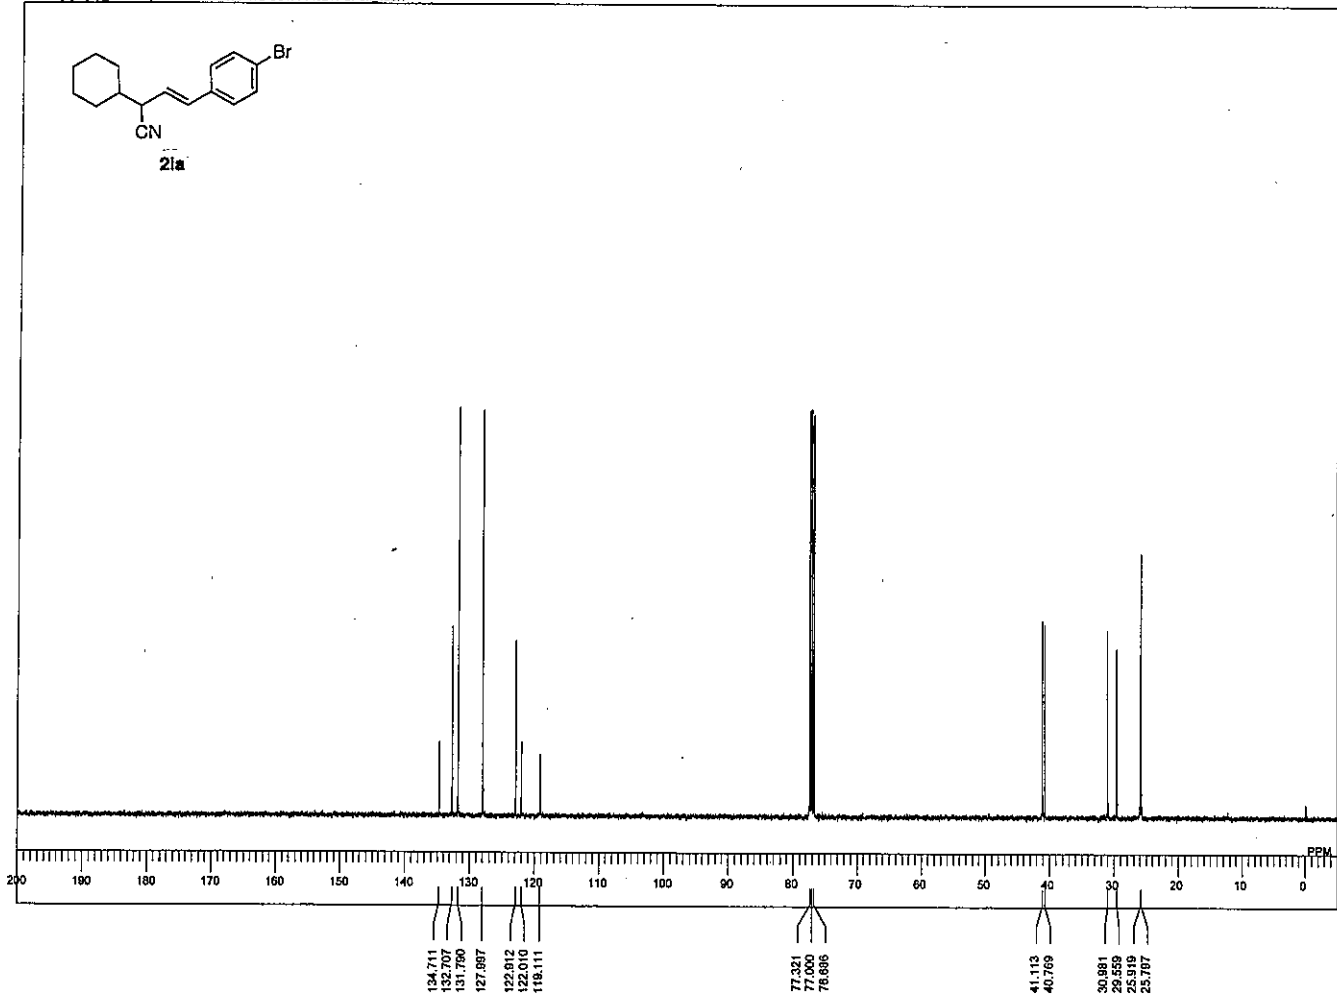

DFILE GSYA-140211-Br  
COMNT  
DATIM 2014-02-11 15:50  
OBNUC 13C  
EXMOD single\_pulse\_dec  
OBFRQ 100.53 MHz  
OBSETE 5.35 KHz  
OBFIN 5.88 Hz  
POINT 32768  
FREQU 25188.92 Hz  
SCANS 1328  
ACQTM 1.3009 sec  
PD 1.0000 sec  
PWI 3.17 usec  
IRNUC  
CTEMP 20.6 c  
SLVNT CDCL3  
EXREF 77.00 ppm  
BF 1.00 Hz  
RGAIN 23



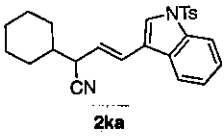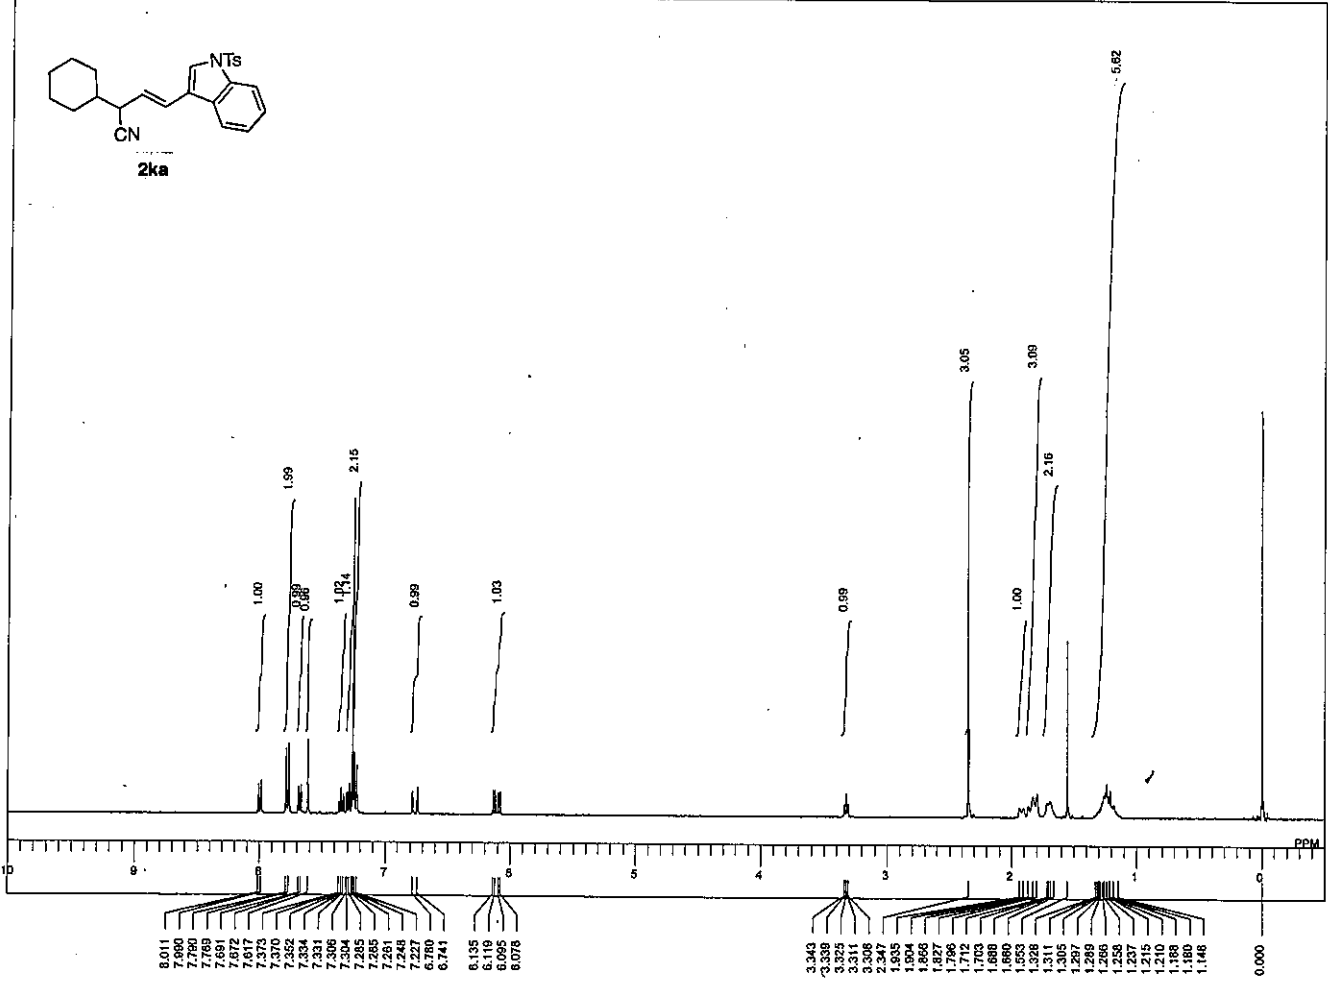

DFILE GSYA-141027-17  
 COMNT single\_pulse.exp  
 DATIM 2014-10-25 14:33  
 OBNUC 1H  
 EXMOD single\_pulse.exp  
 OBFRQ 399.76 MHz  
 OBSET 4.18 KHz  
 OBFIN 7.29 Hz  
 POINT 16384  
 FREQU 5998.80 Hz  
 SCANS 4  
 ACQTM 2.7312 sec  
 PD 2.0000 sec  
 PW1 5.75 usec  
 IRNUC 1H  
 CTEMP 21.4 c  
 SLVNT CDCL3  
 EXREF 0.00 ppm  
 BF 0.12 Hz  
 RGAIN 18

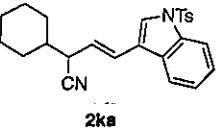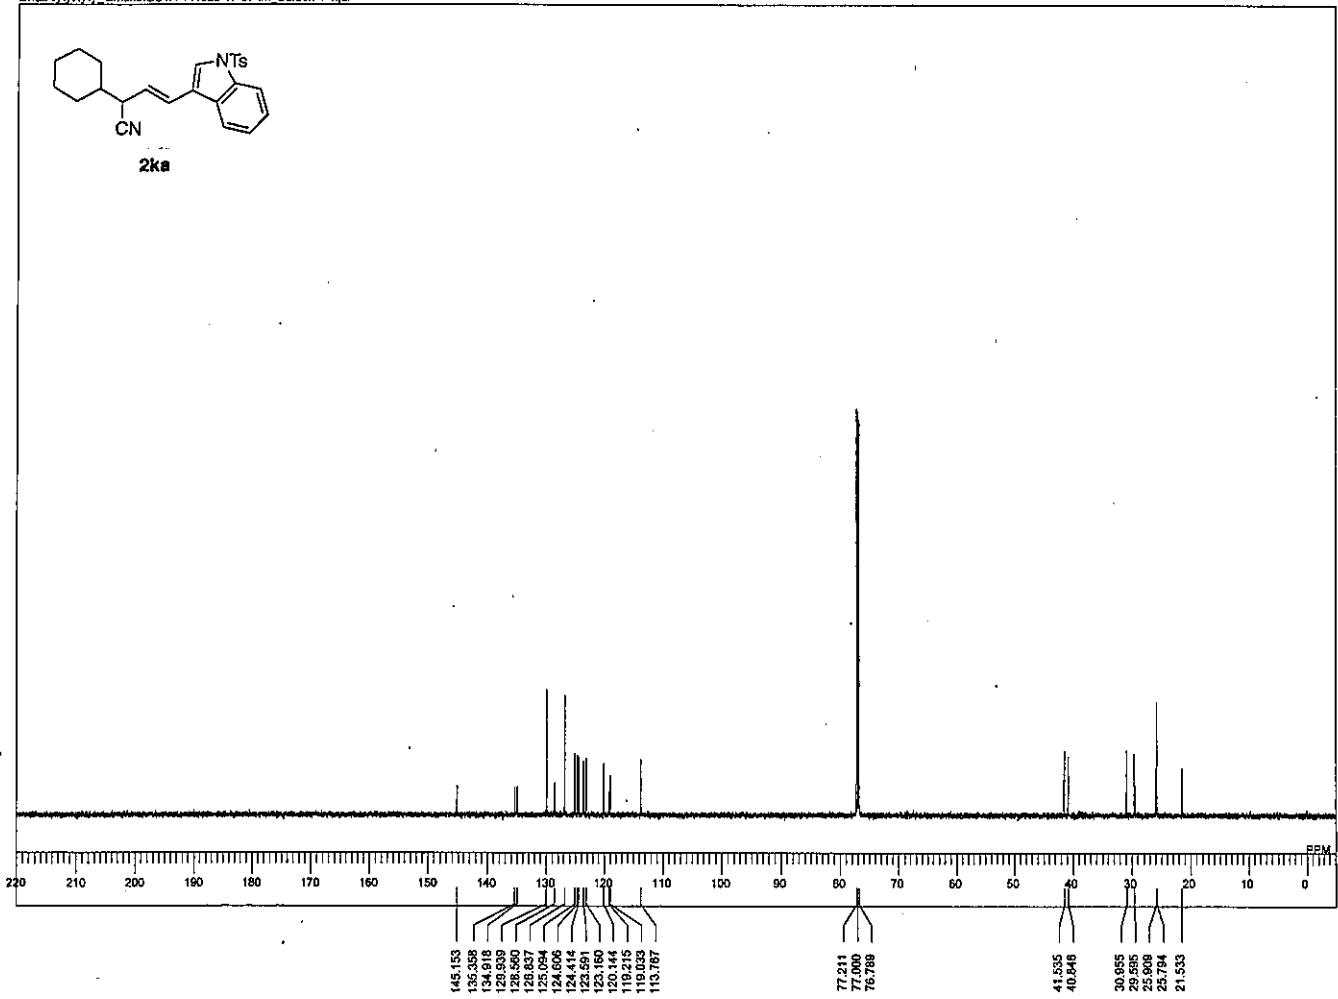

DFILE GSYA-141025-17-  
 COMNT single\_pulse\_deco.  
 DATIM 2014-10-25 11:48  
 OBNUC 13C  
 EXMOD carbon\_jmp  
 OBFRQ 150.62 MHz  
 OBSET 8.52 KHz  
 OBFIN 1.74 Hz  
 POINT 32767  
 FREQU 47348.49 Hz  
 SCANS 800  
 ACQTM 0.6921 sec  
 PD 2.0000 sec  
 PW1 3.27 usec  
 IRNUC 1H  
 CTEMP 20.2 c  
 SLVNT CDCL3  
 EXREF 77.00 ppm  
 BF 1.00 Hz  
 RGAIN 50



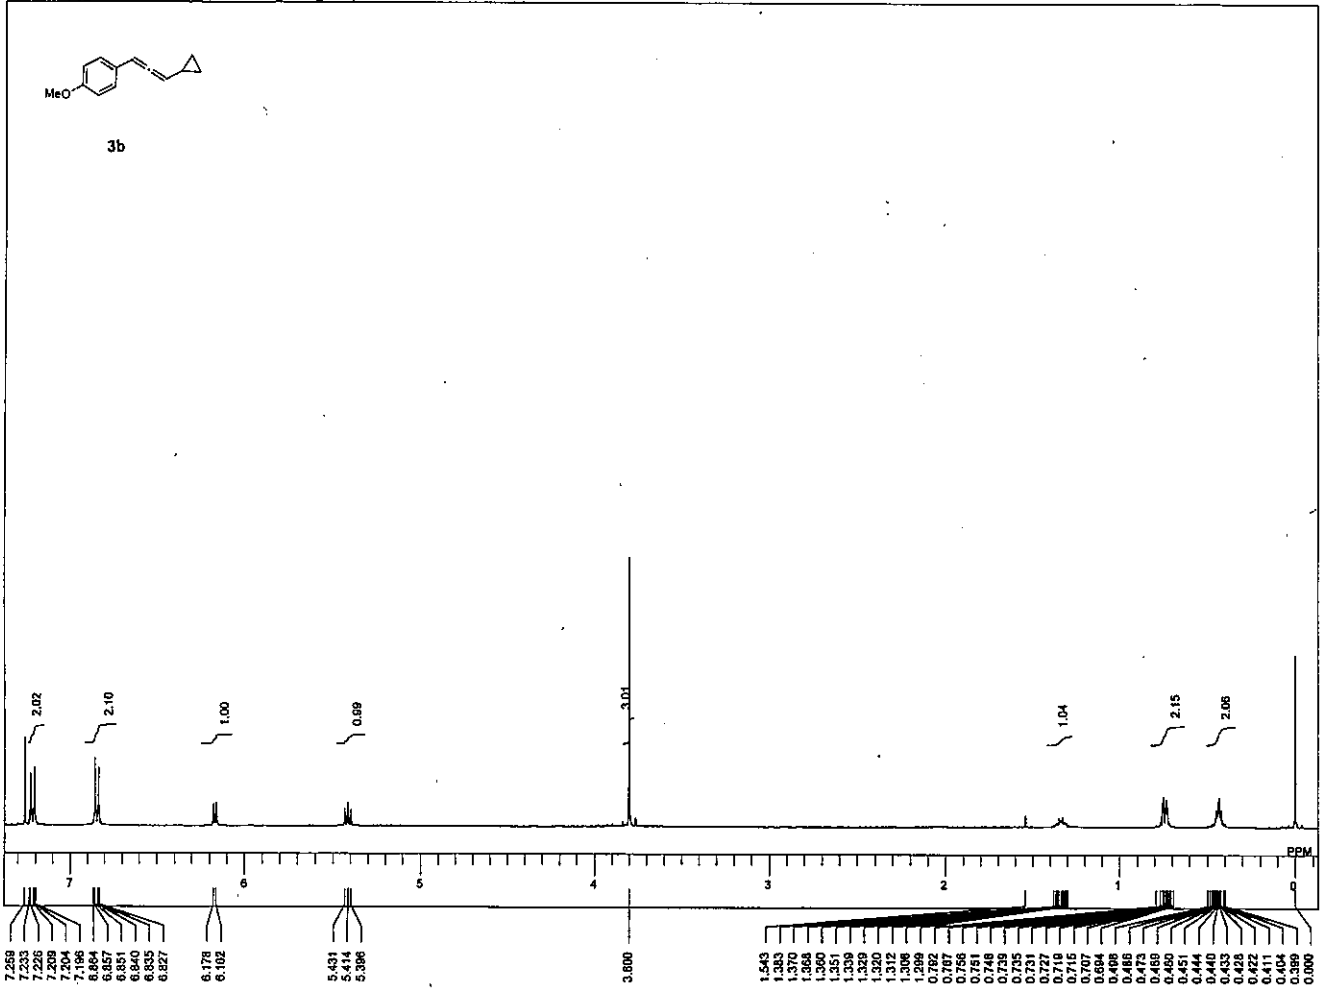

DFILE GSHH\_1201\_2nd\_P  
 COMNT single\_pulse  
 DATIM 2014-04-11 13:43:4  
 OBNUC 1H  
 EXMOD proton.jcp  
 OBFRO 399.78 MHz  
 OBSET 4.19 KHz  
 OBFIN 7.29 Hz  
 POINT 20480  
 FREQU 9378.75 Hz  
 SCANS a  
 ACQTM 2.1837 sec  
 PD 5.0000 sec  
 PW1 5.01 usec  
 IRNUC 1H  
 CTEMP 21.0 c  
 SLVNT CDCL3  
 EXREF 0.00 ppm  
 BF 0.12 Hz  
 RGAIN 46

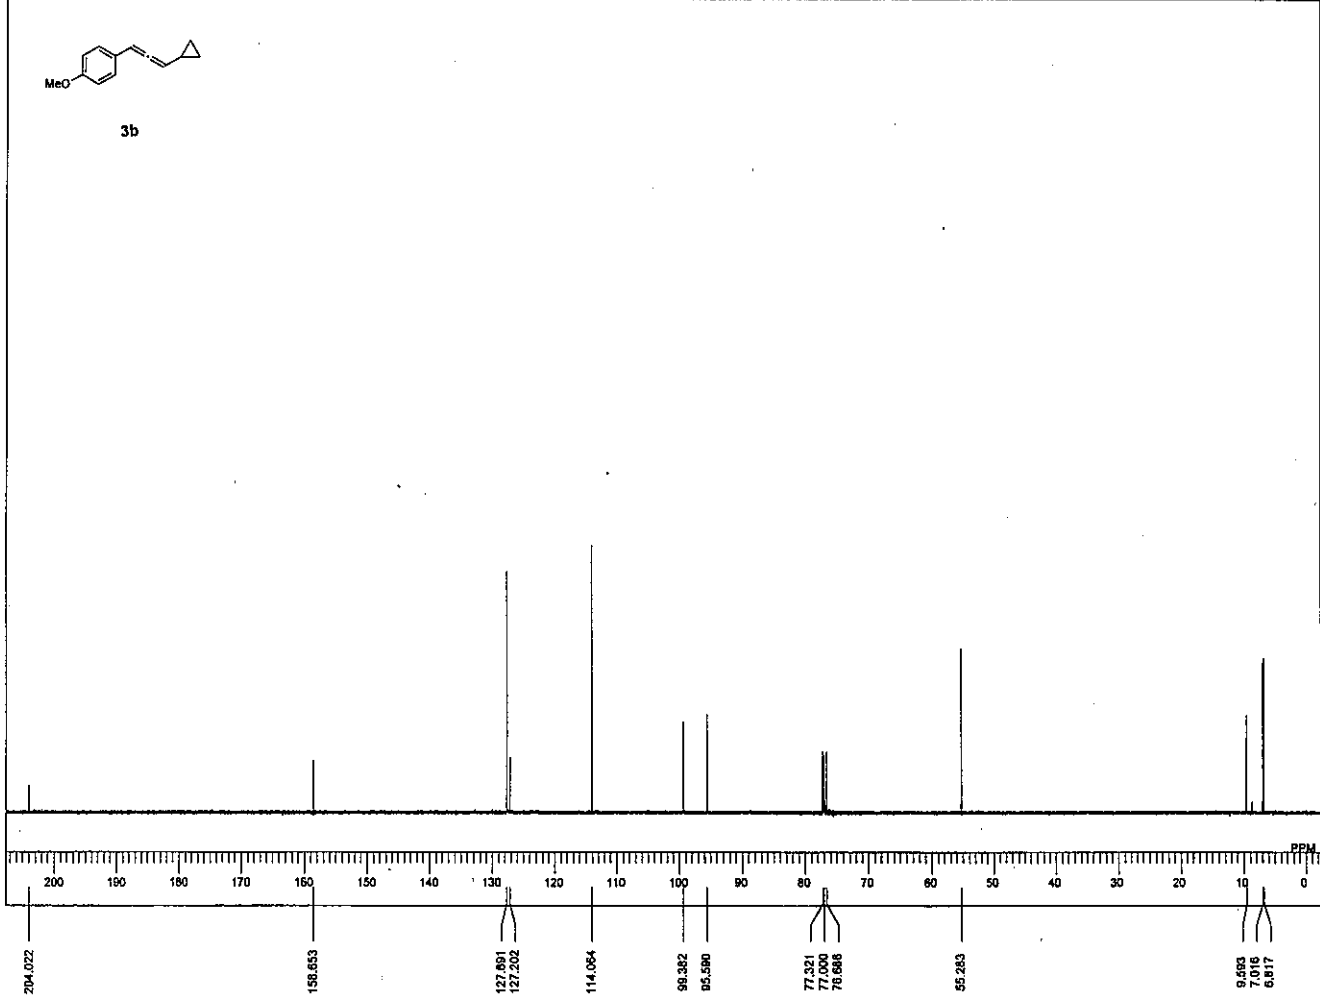

DFILE GSHH\_1201\_c.1  
 COMNT  
 DATIM 2014-04-09 15:26:6  
 OBNUC 13C  
 EXMOD single\_pulse\_dec  
 OBFRO 100.53 MHz  
 OBSET 5.35 KHz  
 OBFIN 5.88 Hz  
 POINT 32768  
 FREQU 25188.92 Hz  
 SCANS 500  
 ACQTM 1.3009 sec  
 PD 1.0000 sec  
 PW1 3.17 usec  
 IRNUC 1H  
 CTEMP 22.1 c  
 SLVNT CDCL3  
 EXREF 77.00 ppm  
 BF 0.12 Hz  
 RGAIN 24

single\_pulse  
D:\GEM\1\1\161-1180\GSHH 11 66 Proton R-1-1.jdf

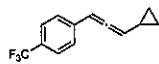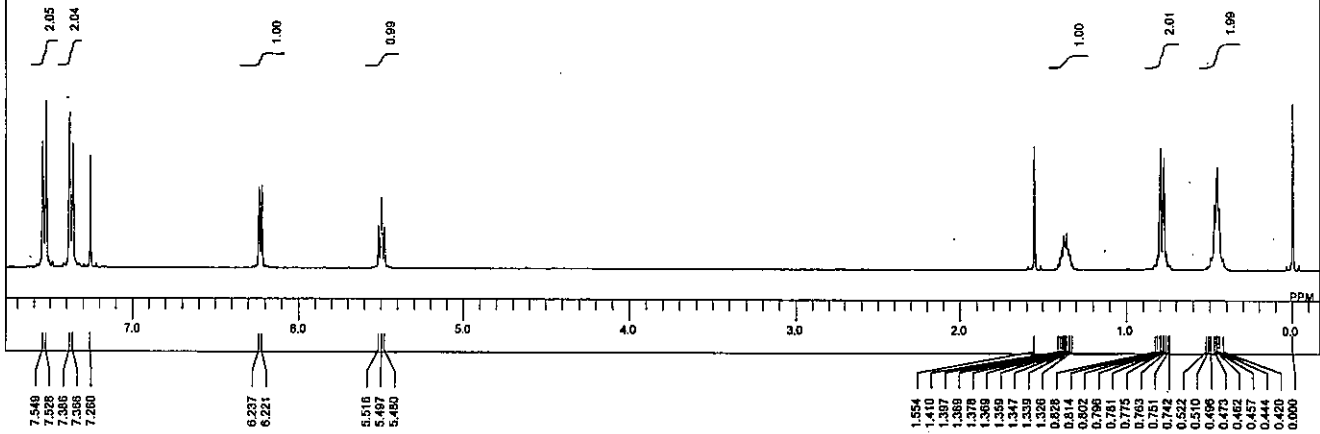

DFILE GSHH 11 66\_Proto  
COMINT single\_pulse  
DATIM 2014-03-19 17:41:3  
OBNUC 1H  
EXMOD proton.jcp  
OBFRO 399.78 MHz  
OBSET 4.19 KHz  
OBFIN 7.29 Hz  
POINT 20480  
FREQU 939.75 Hz  
SCANS 8  
ACQTM 2.1837 sec  
PD 5.0000 sec  
PWI 5.01 usec  
IRNUC 1H  
CTEMP 19.2 c  
SUNVT CDCL3  
EKREF 0.00 ppm  
BF 0.12 Hz  
RGAIN 50

single pulse decoupled gated NOE  
D:\GEM\1\1\161-1180\GSHH 11 66 c\_Carbon R-1-1.als

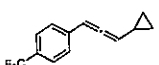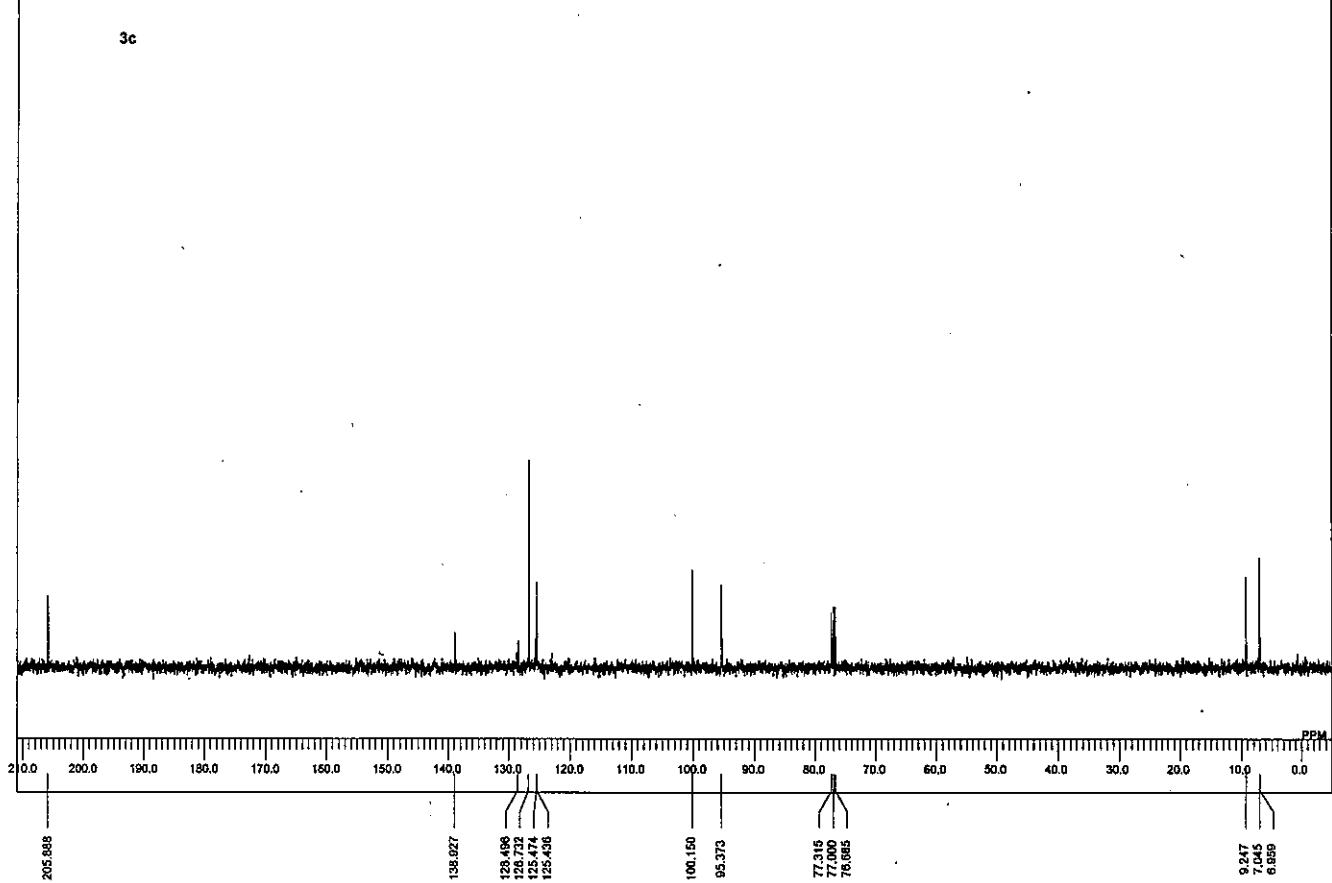

DFILE GSHH 11 66 c\_Car  
COMINT single\_pulse decou  
DATIM 2014-03-19 18:35:5  
OBNUC 13C  
EXMOD carbon.jcp  
OBFRO 100.53 MHz  
OBSET 5.35 KHz  
OBFIN 5.85 Hz  
POINT 32768  
FREQU 31467.04 Hz  
SCANS 50  
ACQTM 1.0433 sec  
PD 2.0000 sec  
PWI 3.02 usec  
IRNUC 1H  
CTEMP 19.8 c  
SUNVT CDCL3  
EKREF 77.00 ppm  
BF 0.12 Hz  
RGAIN 50

single\_pulse  
D:\CE\A\1\1\H\1\1\hor\12\1261-1260\GSHH 12 74 h\_Proton\_R-1-1.jdf

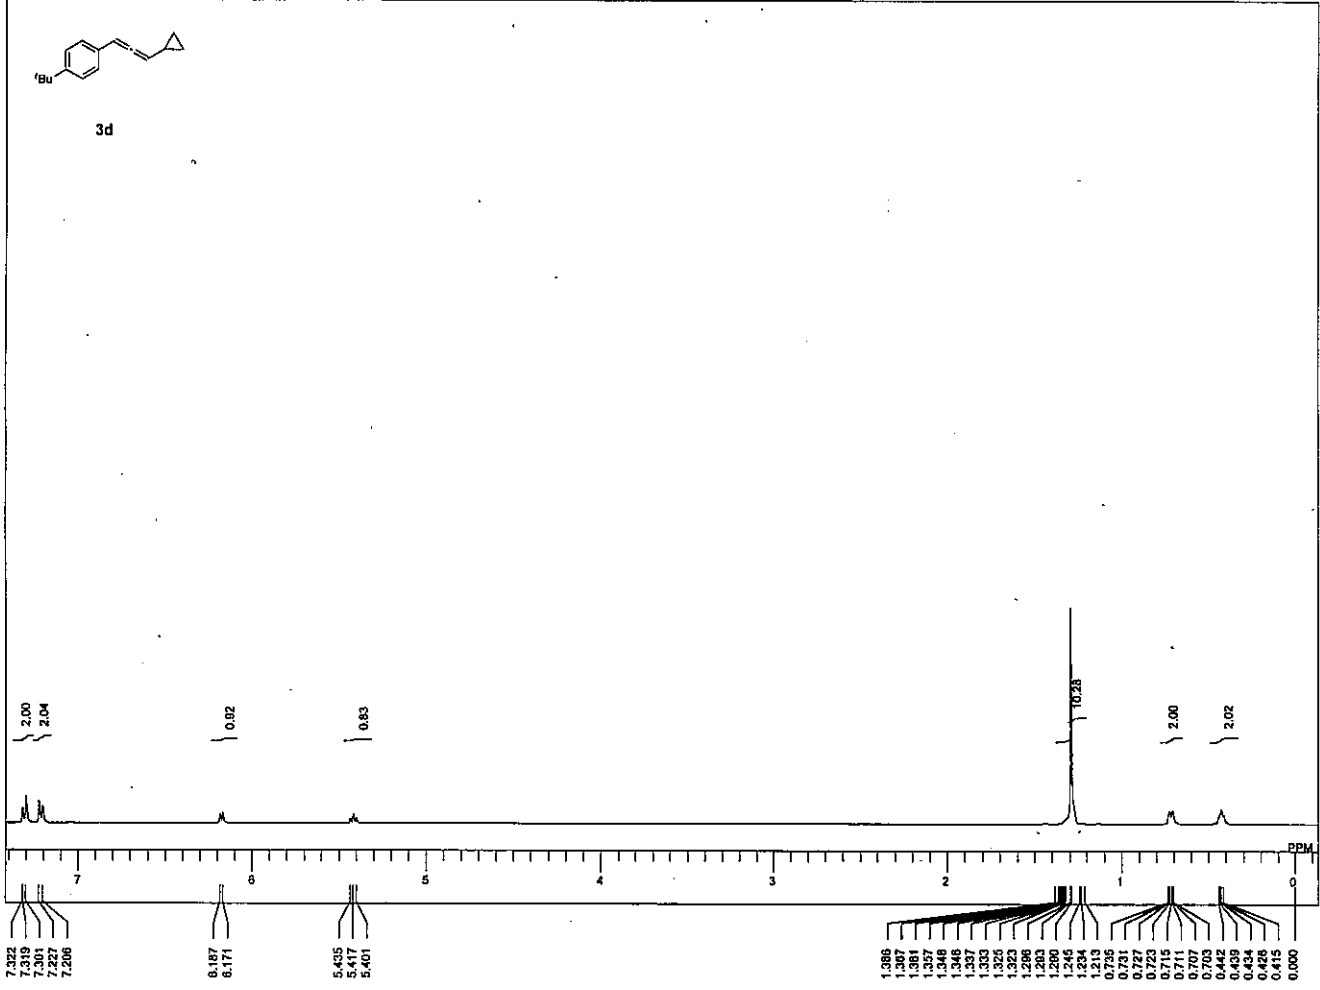

DFILE GSHH 12 74 h\_Pro  
COMNT single\_pulse  
DATIM 2014-05-24 16:57:5  
ORNUC 1H  
EXMOD proton.jcp  
OBFRO 399.78 MHz  
OBSET 4.19 KHz  
OBFIN 7.29 Hz  
POINT 20480  
FREQU 9378.75 Hz  
SCANS 8  
ACQTM 2.1637 sec  
PD 5.0000 sec  
PWI 5.01 usec  
IRNUC 1H  
CTEMP 20.2 c  
SLVNT CDCL3  
EXREF 0.00 ppm  
BF 6.12 Hz  
RGAIN 20

single pulse decoupled gated NOE  
D:\CE\A\1\1\H\1\1\hor\12\1261-1260\GSHH 12 74 h\_Carbon\_R-1-1.jdf

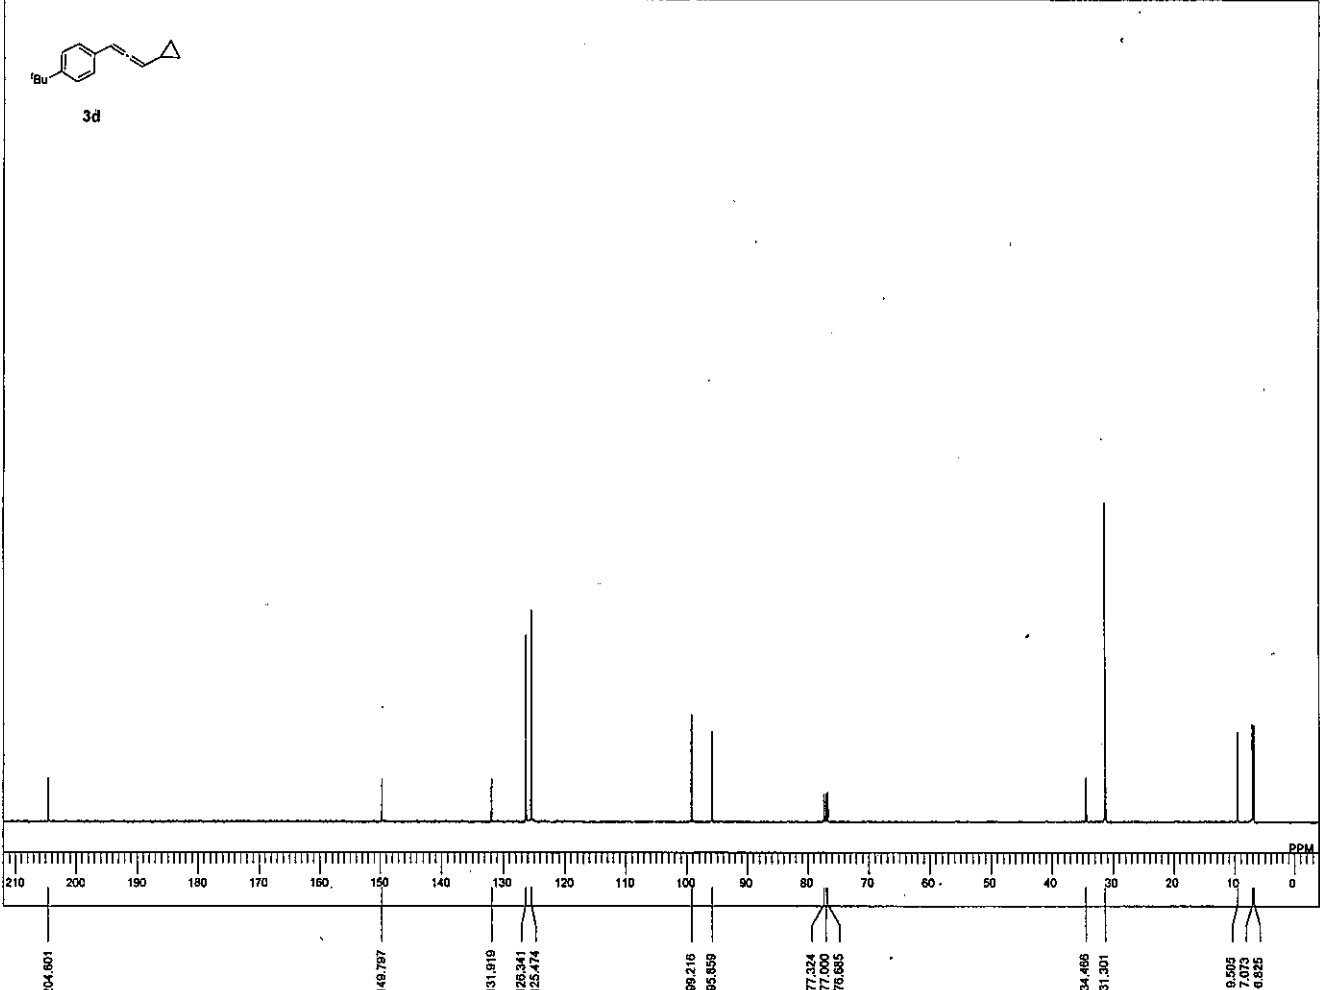

DFILE GSHH 12 74 h\_Car  
COMNT single\_pulse decoupl  
DATIM 2014-05-24 16:59:3  
ORNUC 13C  
EXMOD carbon.jcp  
OBFRO 100.63 MHz  
OBSET 5.35 KHz  
OBFIN 5.88 Hz  
POINT 40960  
FREQU 39258.79 Hz  
SCANS 50  
ACQTM 1.0433 sec  
PD 2.0000 sec  
PWI 3.02 usec  
IRNUC 1H  
CTEMP 20.4 c  
SLVNT CDCL3  
EXREF 77.00 ppm  
BF 0.12 Hz  
RGAIN 50



single\_pulse  
D:\CEAI\1\H\1\\_horh121261-1280\GSHH 12 73 h\_Proton f-1-1.als

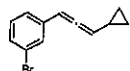

3f

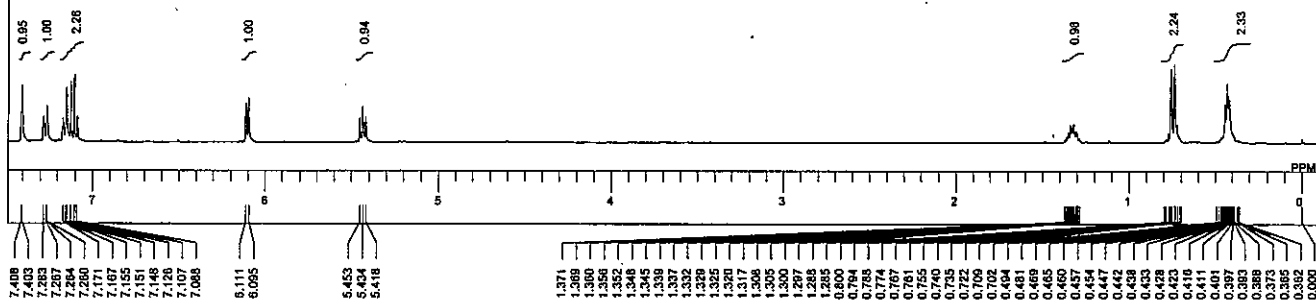

DFILE GSHH 12 73 h\_Proton  
COMINT single\_pulse  
DATIM 2014-05-24 16:02:31  
OBNUC 1H  
EXMOC proton.jpg  
OBFRQ 399.78 MHz  
OBSET 4.19 KHz  
OBFIN 7.29 Hz  
POINT 16384  
FREQU 7503.00 Hz  
SCANS 8  
ACQTM 2.1837 sec  
PD 5.0000 sec  
PWI 5.01 usec  
IRNUC 1H  
CTEMP 20.1 c  
SIVNT CDCL3  
EXREF 0.00 ppm  
BF 0.12 Hz  
RGAIN 22

single pulse decoupled gated NOE

D:\CEAI\1\H\1\\_horh121261-1280\GSHH 12 73 c\_Carbon f-1-1.1df

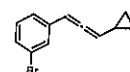

3f

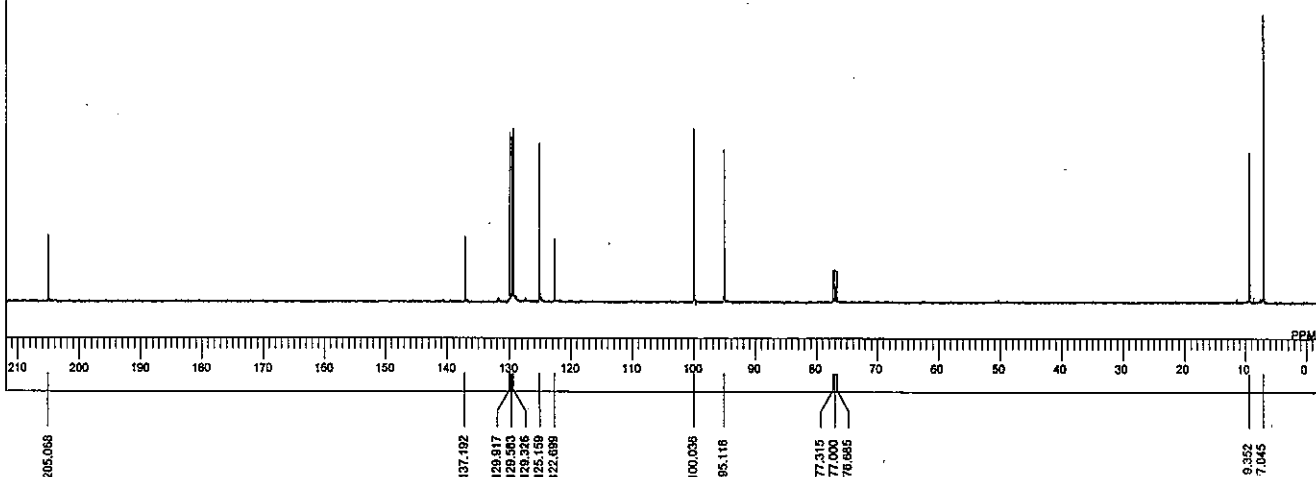

DFILE GSHH 12 73 c\_Carbon  
COMINT single\_pulse\_decoupled  
DATIM 2014-05-24 16:04:00  
OBNUC 13C  
EXMOC carbon.jpg  
OBFRQ 100.53 MHz  
OBSET 5.35 KHz  
OBFIN 5.86 Hz  
POINT 40960  
FREQU 39258.79 Hz  
SCANS 50  
ACQTM 1.0433 sec  
PD 2.0000 sec  
PWI 3.02 usec  
IRNUC 1H  
CTEMP 20.3 c  
SIVNT CDCL3  
EXREF 77.00 ppm  
BF 0.12 Hz  
RGAIN 50

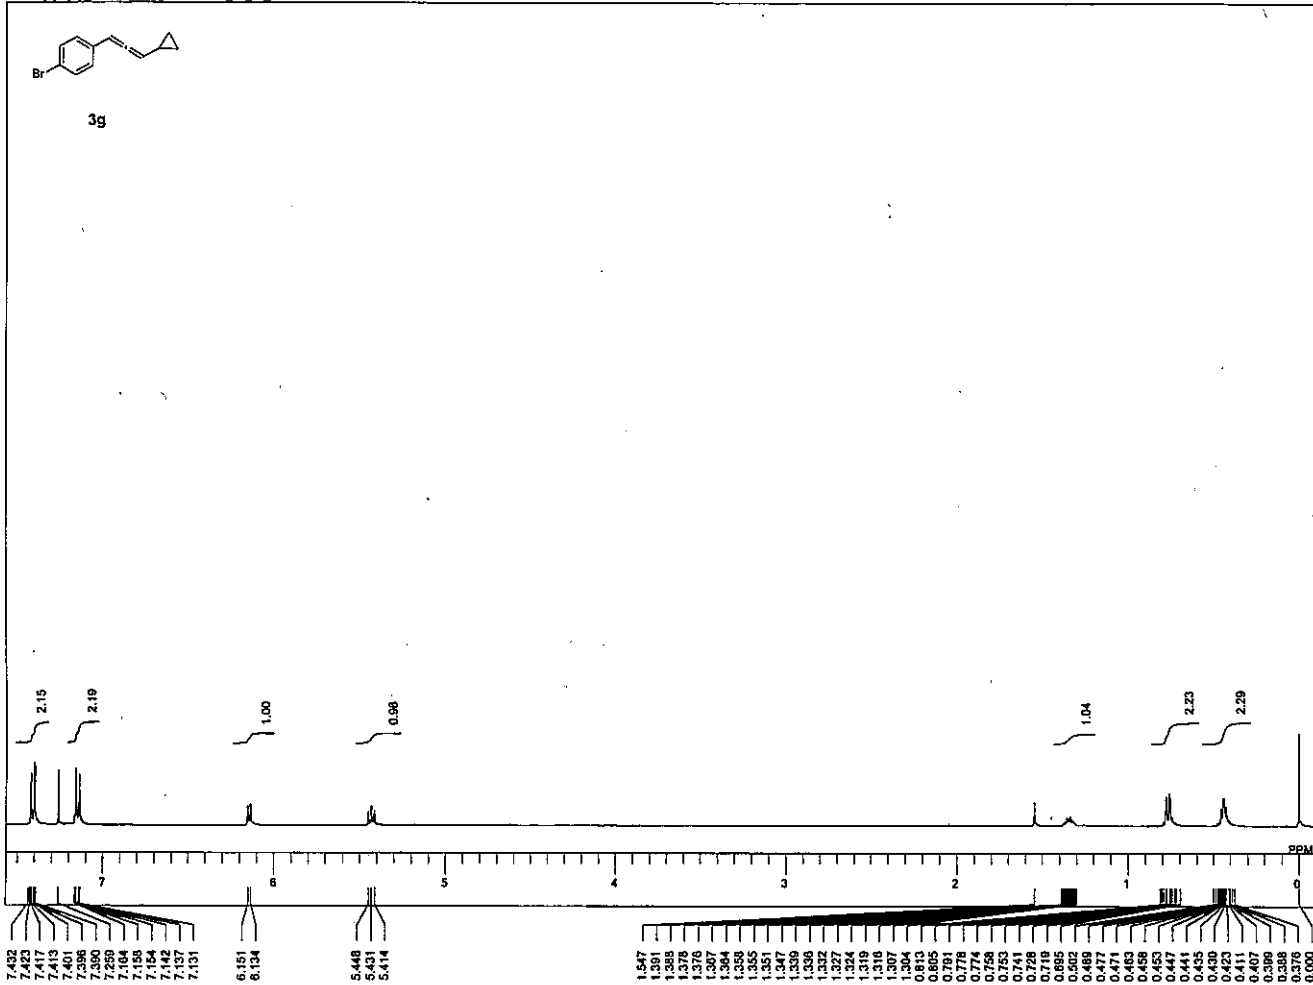

DFILE GSHH\_12\_69\_h.1  
 COMNT 2014-05-23 12:43:5  
 DATIM single\_pulse.exp  
 OBNUC 1H  
 EXMOD 399.78 MHz  
 OBFRQ 4.19 kHz  
 OBSET 7.23 Hz  
 OBFIN 18384  
 POINT 5996.60 Hz  
 FREQU 8  
 SCANS 2.7312 sec  
 ACQTM 2.0000 sec  
 PD 6.70 usec  
 PWI 21.7 c  
 IRNUC CDCL3  
 CTEMP 0.00 ppm  
 SLVNT BF  
 EXREF 0.12 Hz  
 RGAIN 16

single pulse decoupled gated NOE

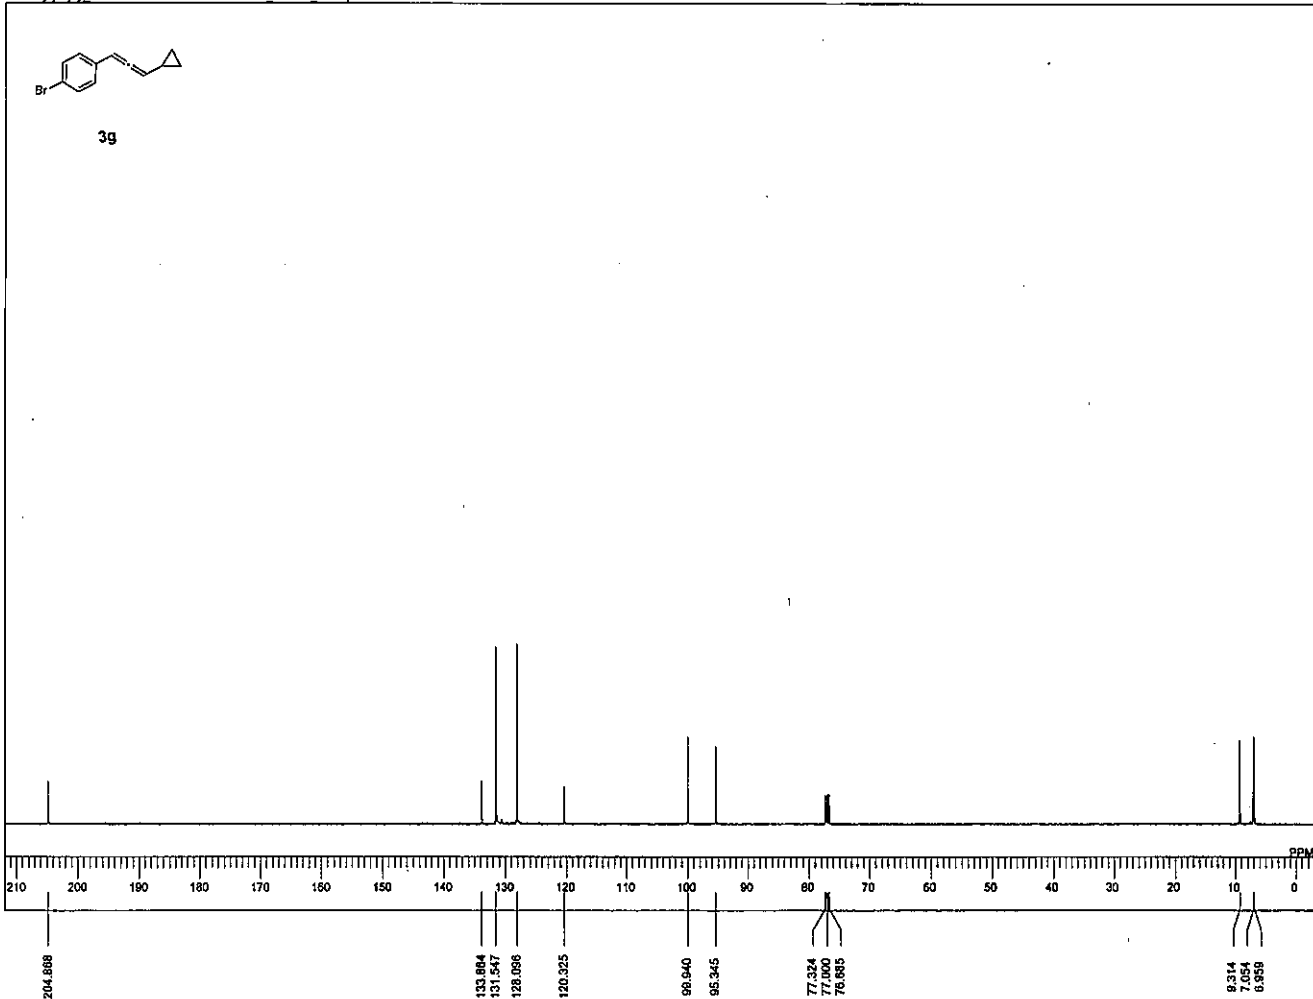

DFILE GSHH\_12\_69\_c\_Car  
 COMNT single\_pulse\_decou  
 DATIM 2014-05-23 13:04:1  
 OBNUC 13C  
 EXMOD carbon.jxp  
 OBFRQ 100.53 MHz  
 OBSET 5.35 kHz  
 OBFIN 5.88 Hz  
 POINT 40960  
 FREQU 39258.79 Hz  
 SCANS 100  
 ACQTM 1.0433 sec  
 PD 2.0000 sec  
 PWI 3.02 usec  
 IRNUC 1H  
 CTEMP 20.2 c  
 SLVNT CDCL3  
 EXREF 77.00 ppm  
 BF 0.12 Hz  
 RGAIN 50

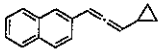

3h

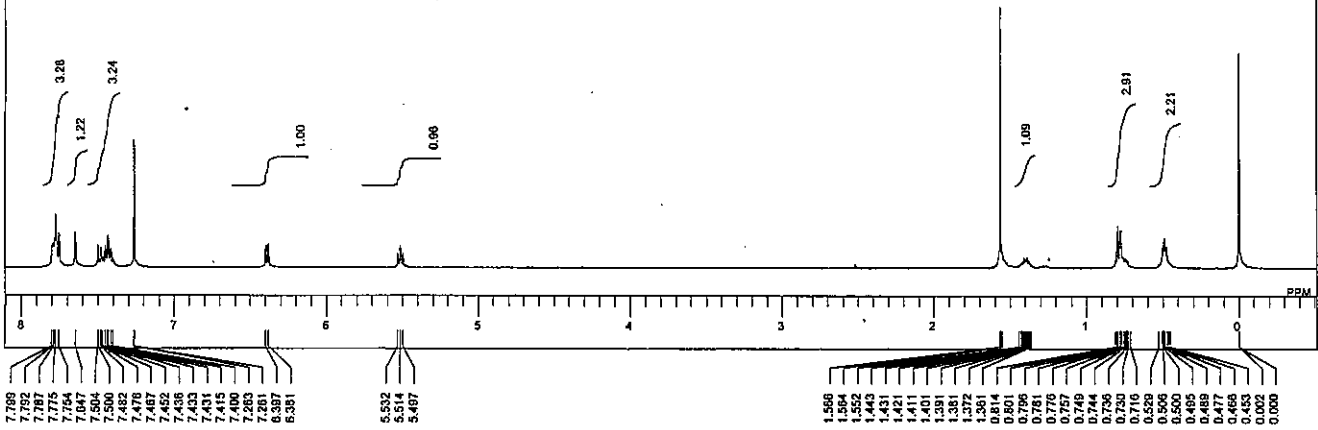

DFILE GSHH\_13\_01\_1h.1  
 COMNT 2014-05-28 08:25:3  
 DATIM 1H  
 OBNUC single\_pulse.exp  
 EXMOD 399.78 MHz  
 OBFRQ 4.19 KHz  
 OBSET 7.28 Hz  
 OBFIN 16384  
 POINT 18384  
 FREQU 5998.80 Hz  
 SCANS 8  
 ACQTM 2.7312 sec  
 PD 2.0000 sec  
 PW1 6.70 usec  
 IRNUC 19.6 c  
 CTEMP CDCl3  
 SLVNT 0.00 ppm  
 EXREF 0.12 Hz  
 BF 18  
 RGAIN 18

single pulse decoupled gated NMR

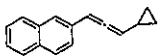

3h

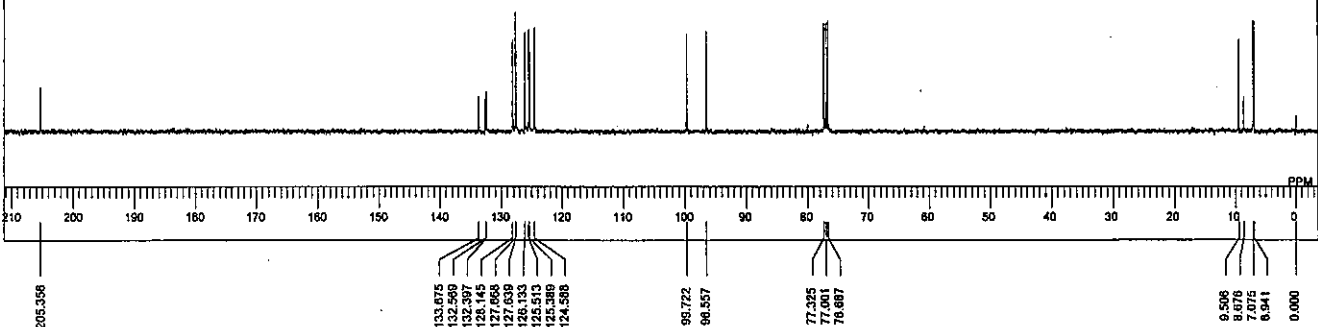

DFILE GSHH\_13\_01\_c\_Car  
 COMNT single\_pulse decou  
 DATIM 2014-05-28 10:37:3  
 OBNUC 13C  
 EXMOD carbon.jpg  
 OBFRQ 100.53 MHz  
 OBSET 5.35 KHz  
 OBFIN 5.86 Hz  
 POINT 40960  
 FREQU 39255.79 Hz  
 SCANS 50  
 ACQTM 1.0433 sec  
 PD 2.0000 sec  
 PW1 3.02 usec  
 IRNUC 1H  
 CTEMP 20.9 c  
 SLVNT CDCl3  
 EXREF 0.00 ppm  
 BF 0.12 Hz  
 RGAIN 50

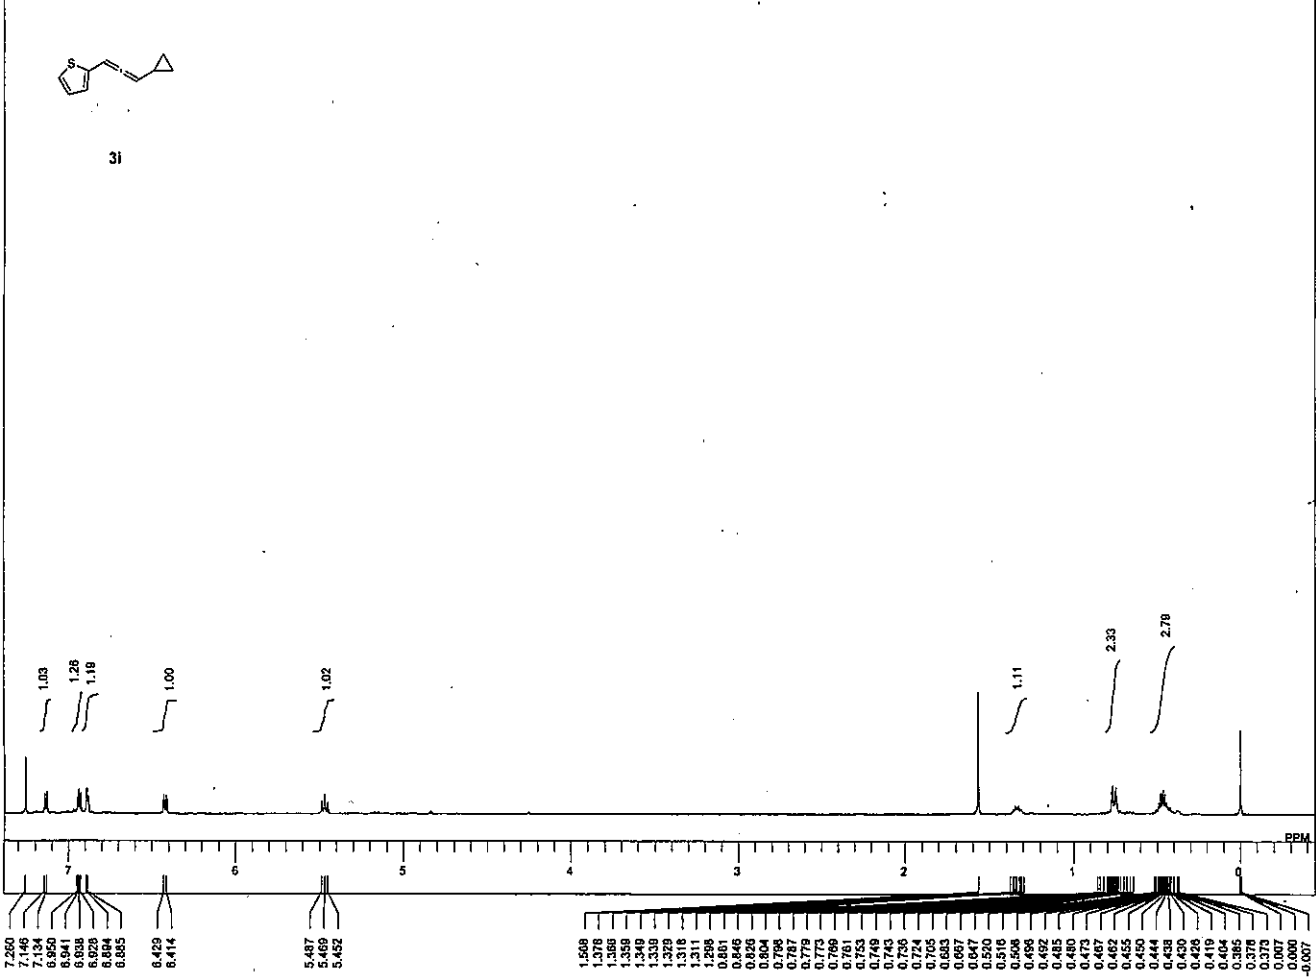

DFILE GSHH\_13\_02\_1h.1  
 COMNT 2014-05-28 08:29:0  
 DATIM 1H  
 OBNUC single\_pulse.exp  
 EXMOD 399.78 MHz  
 OBFRQ 4.19 KHz  
 OBSET 7.29 Hz  
 OBFIN 16384  
 POINT 5998.80 Hz  
 SCANS 8  
 ACQTM 2.7312 sec  
 PD 2.0000 sec  
 PWI 6.70 usec  
 IRNUC  
 CTEMP 19.7 c  
 SLVNT CDCL3  
 EXREF 0.00 ppm  
 BF 0.12 Hz  
 RGAIN 17

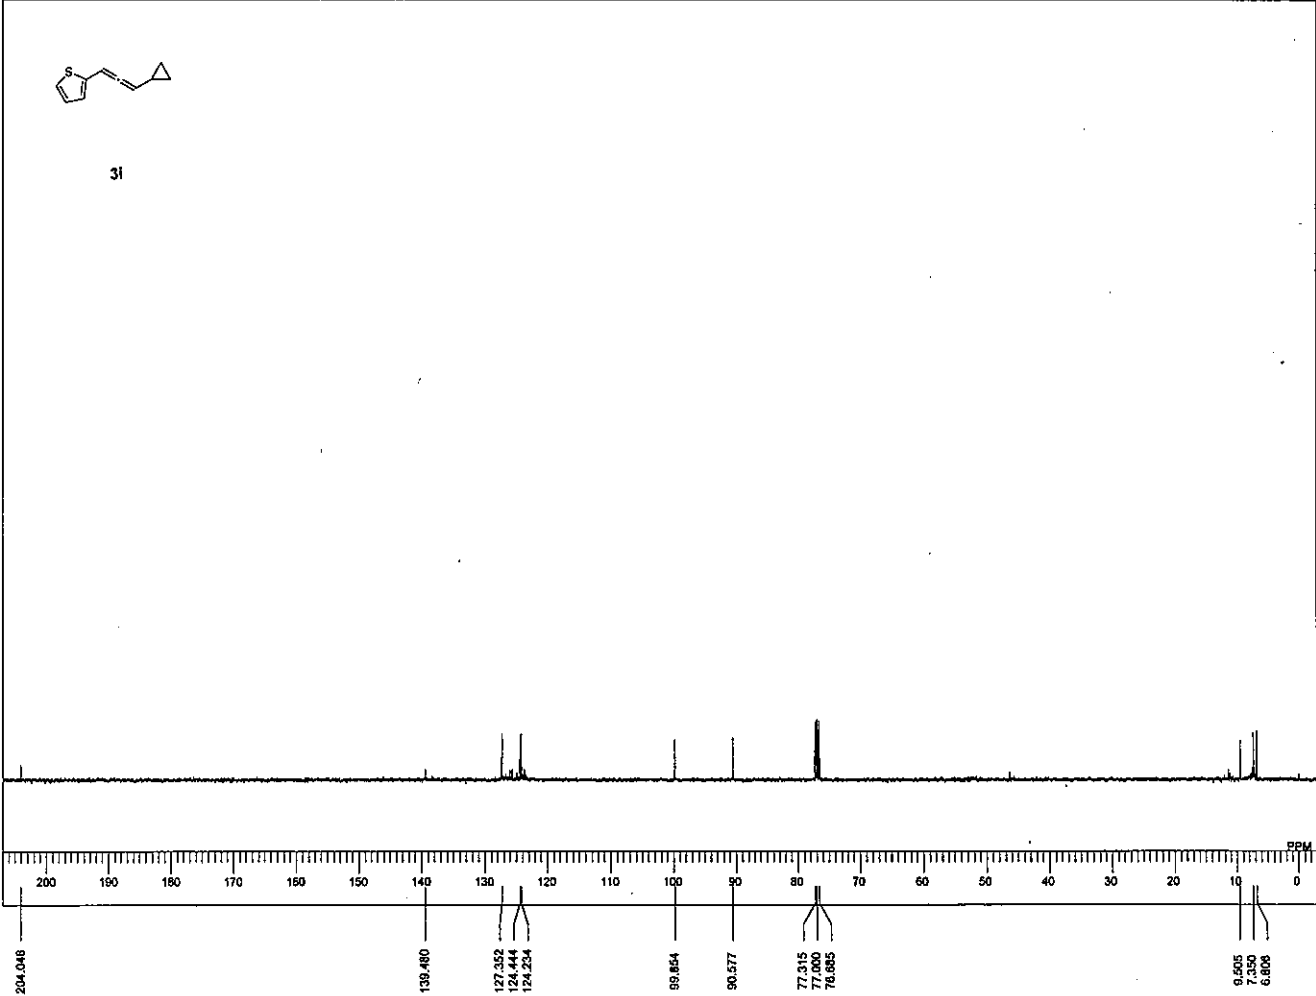

DFILE GSHH\_13\_02\_c\_Car  
 COMNT single pulse decou  
 DATIM 2014-05-28 10:42:3  
 OBNUC 13C  
 EXMOD carbon.jcp  
 OBFRQ 100.63 MHz  
 OBSET 5.33 KHz  
 OBFIN 5.88 Hz  
 POINT 40980  
 FREQU 39258.79 Hz  
 SCANS 50  
 ACQTM 1.0453 sec  
 PD 2.0000 sec  
 PWI 3.02 usec  
 IRNUC 1H  
 CTEMP 20.6 c  
 SLVNT CDCL3  
 EXREF 77.00 ppm  
 BF 0.12 Hz  
 RGAIN 50



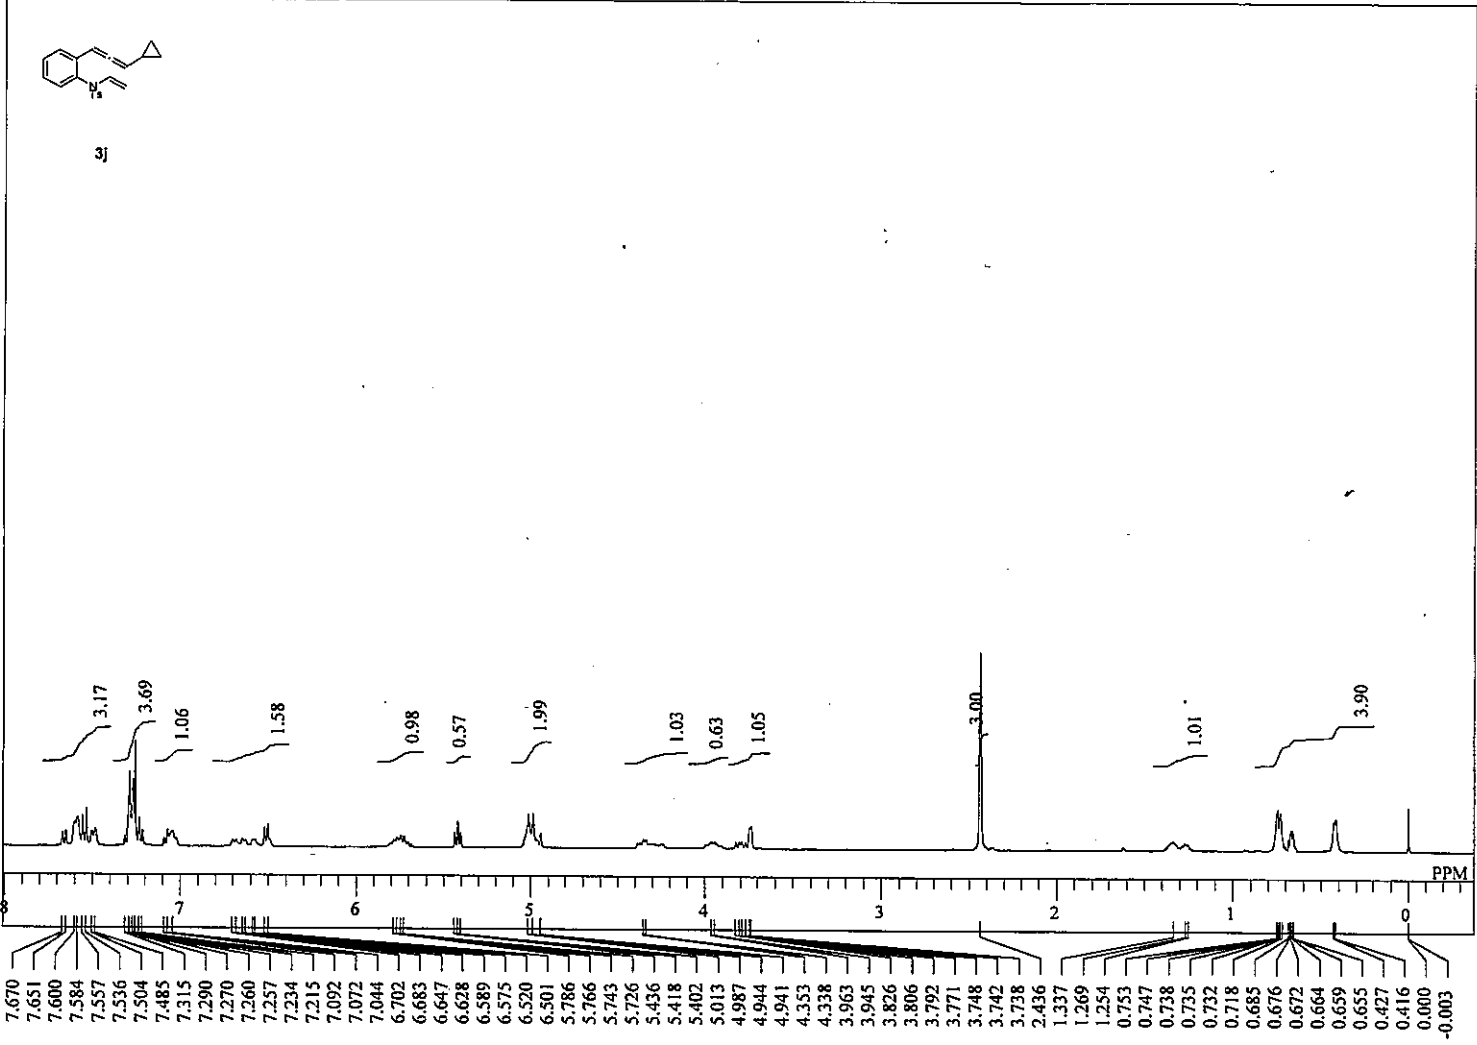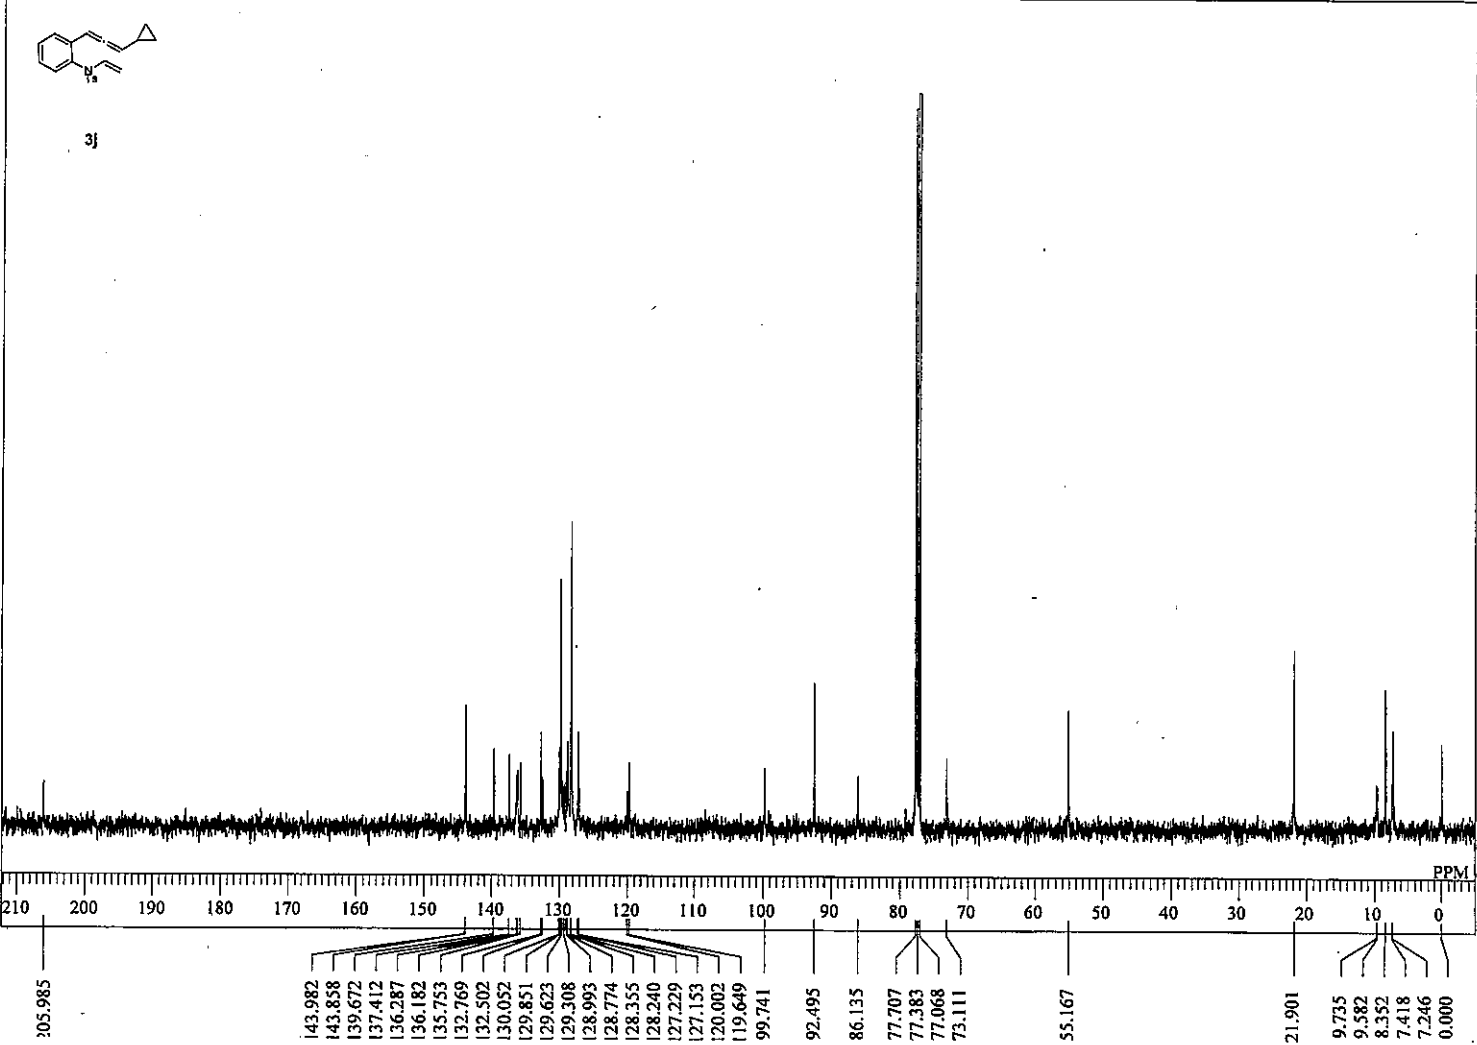

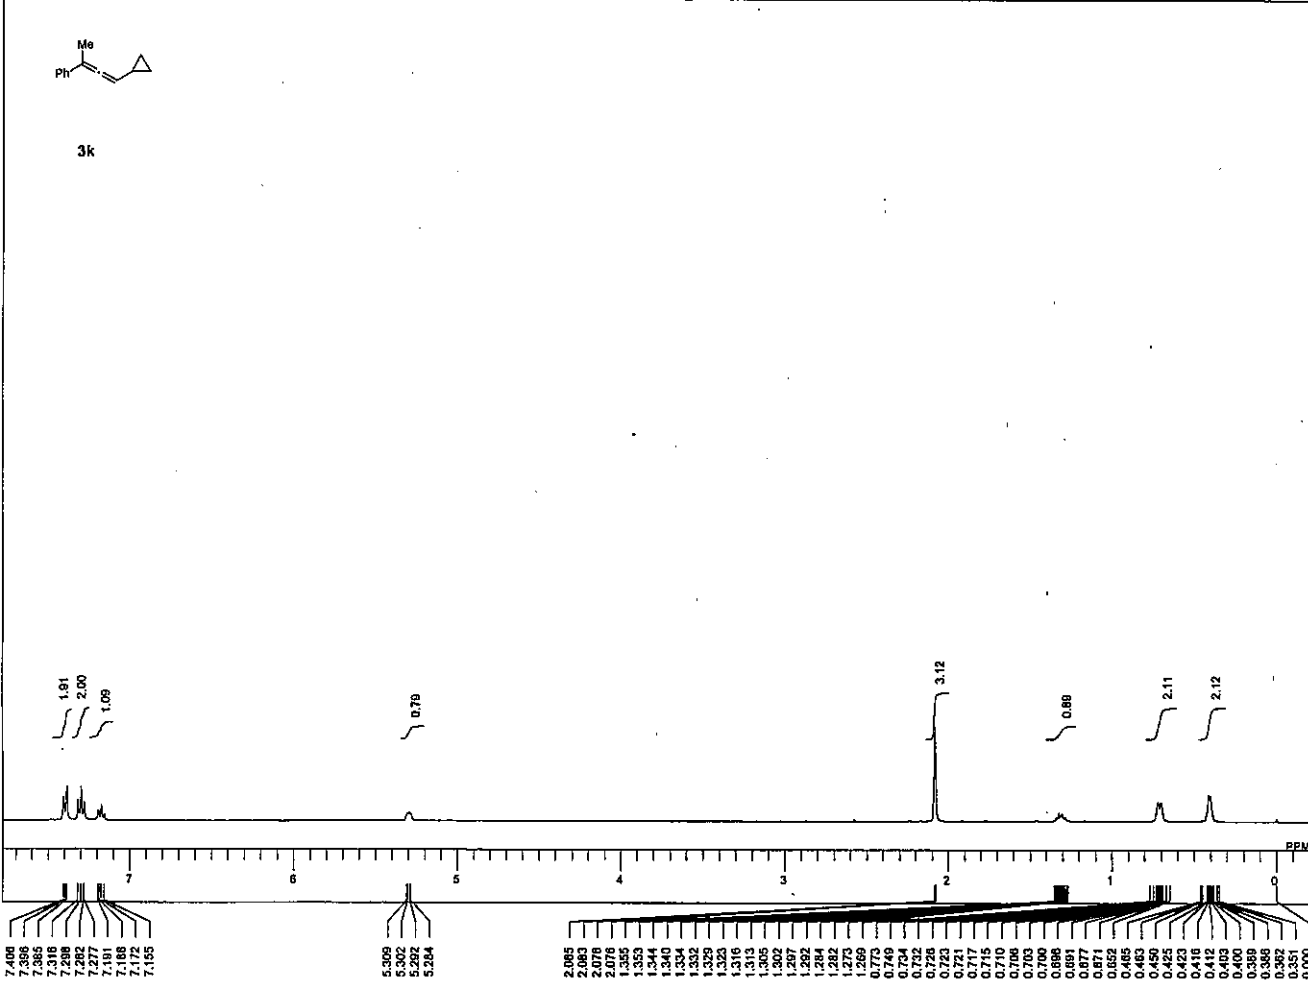

DFILE GSHH 13 13\_Proto  
 COMMENT single\_pulse  
 DATIM 2014-05-30 18:18:2  
 OBNUC 1H  
 EXMOD proton.jso  
 OBFRQ 399.78 MHz  
 OBSEF 4.19 KHz  
 OBFIN 7.29 Hz  
 POINT 20480  
 FREQU 9378.75 Hz  
 SCANS 8  
 ACQTM 2.1837 sec  
 PD 5.0000 sec  
 PW1 5.01 usec  
 IRNUC 1H  
 CTEMP 20.5 c  
 SLVNT CDCL3  
 EXREF 0.00 ppm  
 BF 0.12 Hz  
 RGAIN 24

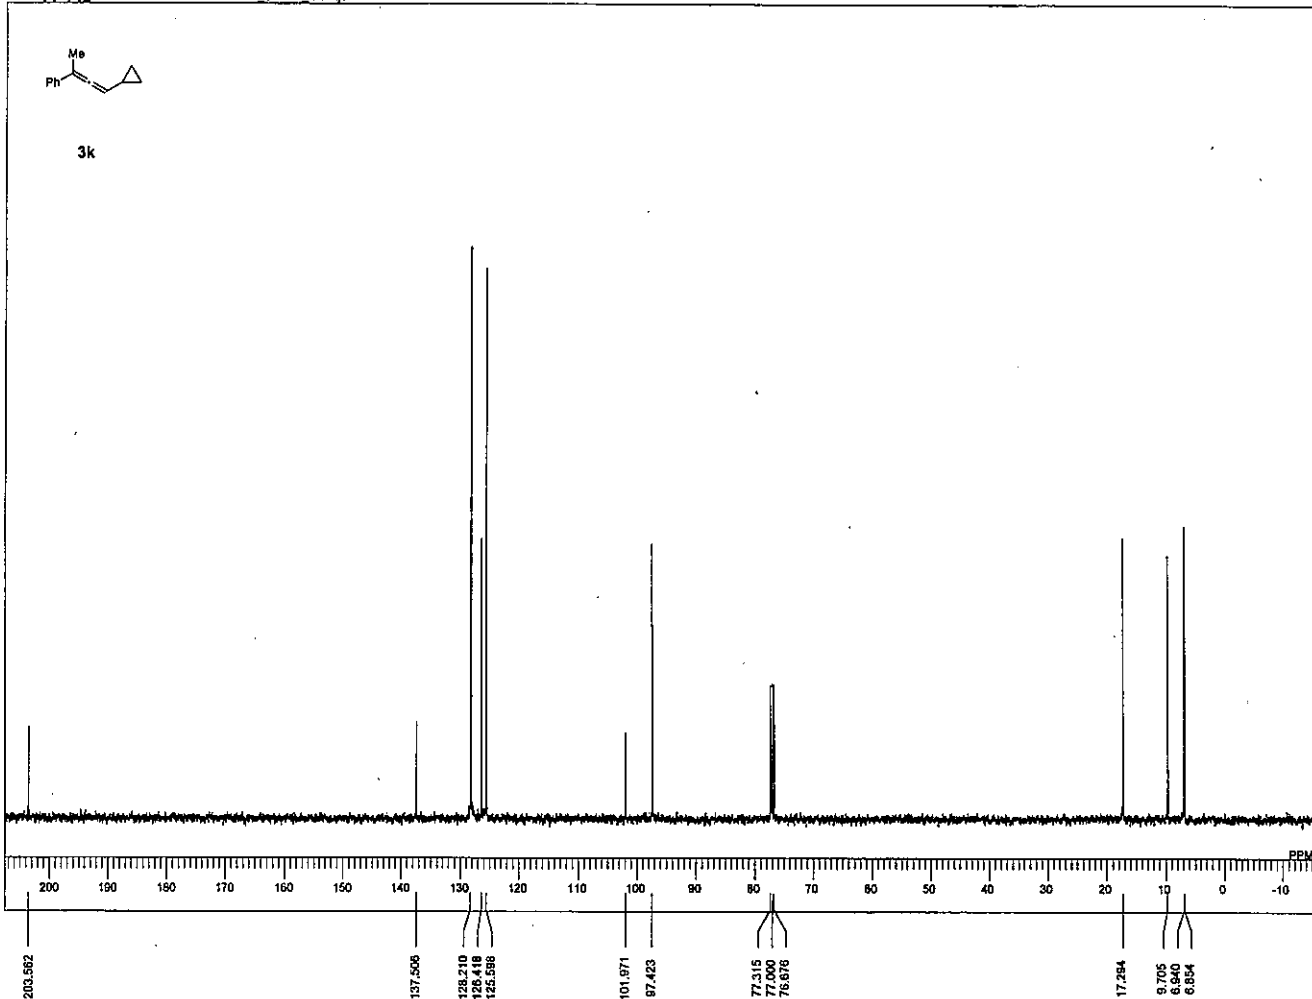

DFILE GSHH 13 13\_Carb  
 COMMENT single\_pulse decou  
 DATIM 2014-05-30 18:17:5  
 OBNUC 13C  
 EXMOD carbon.jso  
 OBFRQ 100.53 MHz  
 OBSEF 5.35 KHz  
 OBFIN 5.88 Hz  
 POINT 40960  
 FREQU 39259.79 Hz  
 SCANS 20  
 ACQTM 1.0433 sec  
 PD 2.0000 sec  
 PW1 3.02 usec  
 IRNUC 1H  
 CTEMP 20.8 c  
 SLVNT CDCL3  
 EXREF 77.00 ppm  
 BF 0.12 Hz  
 RGAIN 50



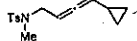

3m

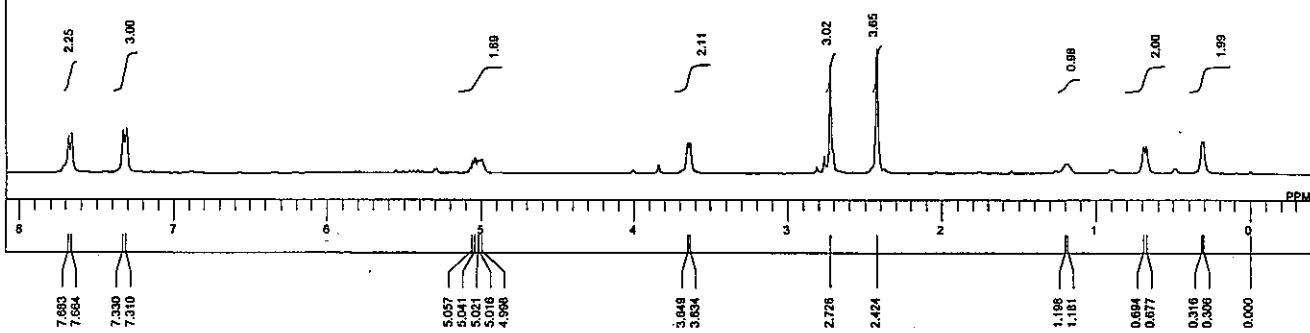

DFILE GSHH\_14\_03\_h.als  
 COMNT 2014-07-07 15:12:5  
 DATIM  
 OBNUC 1H  
 EXMOD single\_pulse.exp  
 OBFRQ 399.78 MHz  
 OBSET 4.19 KHz  
 OBFIN 7.29 Hz  
 POINT 16384  
 FRECU 5998.80 Hz  
 SCANS 8  
 ACQTM 2.7312 sec  
 PD 2.0000 sec  
 PW1 5.75 usec  
 IRNUC  
 CTEMP 21.7 c  
 SLVNT CDCL3  
 EXREF 0.00 ppm  
 BF 3.00 Hz  
 RGAIN 8

single pulse decoupled gated NOE

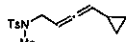

3m

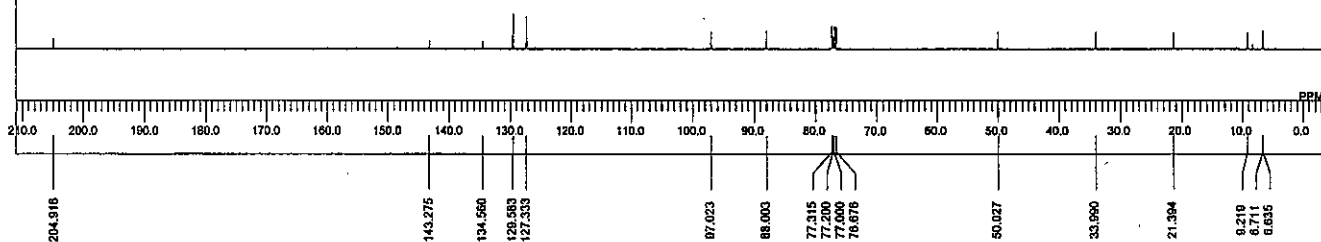

DFILE GSHH\_14\_03\_2nd\_C  
 COMNT single\_pulse\_decou  
 DATIM 2014-08-15 17:08:4  
 OBNUC 13C  
 EXMOD carbon\_jsp  
 OBFRQ 100.53 MHz  
 OBSET 5.35 KHz  
 OBFIN 5.86 Hz  
 POINT 40950  
 FRECU 39258.79 Hz  
 SCANS 30  
 ACQTM 1.0433 sec  
 PD 2.0000 sec  
 PW1 3.02 usec  
 IRNUC 1H  
 CTEMP 23.9 c  
 SLVNT CDCL3  
 EXREF 77.00 ppm  
 BF 0.12 Hz  
 RGAIN 50

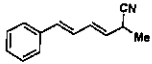

4a

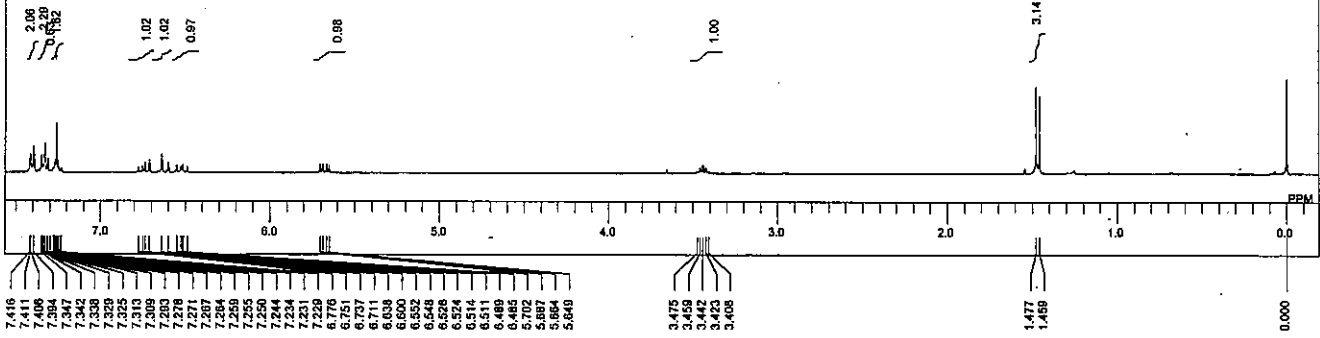

DFILE GSHH\_11\_60\_tm.1  
 COMNT  
 DATIM 2014-03-15 14:27:5  
 OBNUC 1H  
 EXMOD single\_pulse.exp  
 OBFRQ 399.78 MHz  
 OBSET 4.19 kHz  
 OBFIN 7.29 Hz  
 POINT 16384  
 FREQU 5998.80 Hz  
 SCANS 8  
 ACQTM 2.7312 sec  
 PD 2.0000 sec  
 IRNUC 6.00 usec  
 PW1  
 IRNUC  
 CTEMP 21.8 c  
 SLVNT CDCL3  
 EXREF 0.00 ppm  
 BF 0.12 Hz  
 RGAIN 17

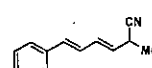

4a

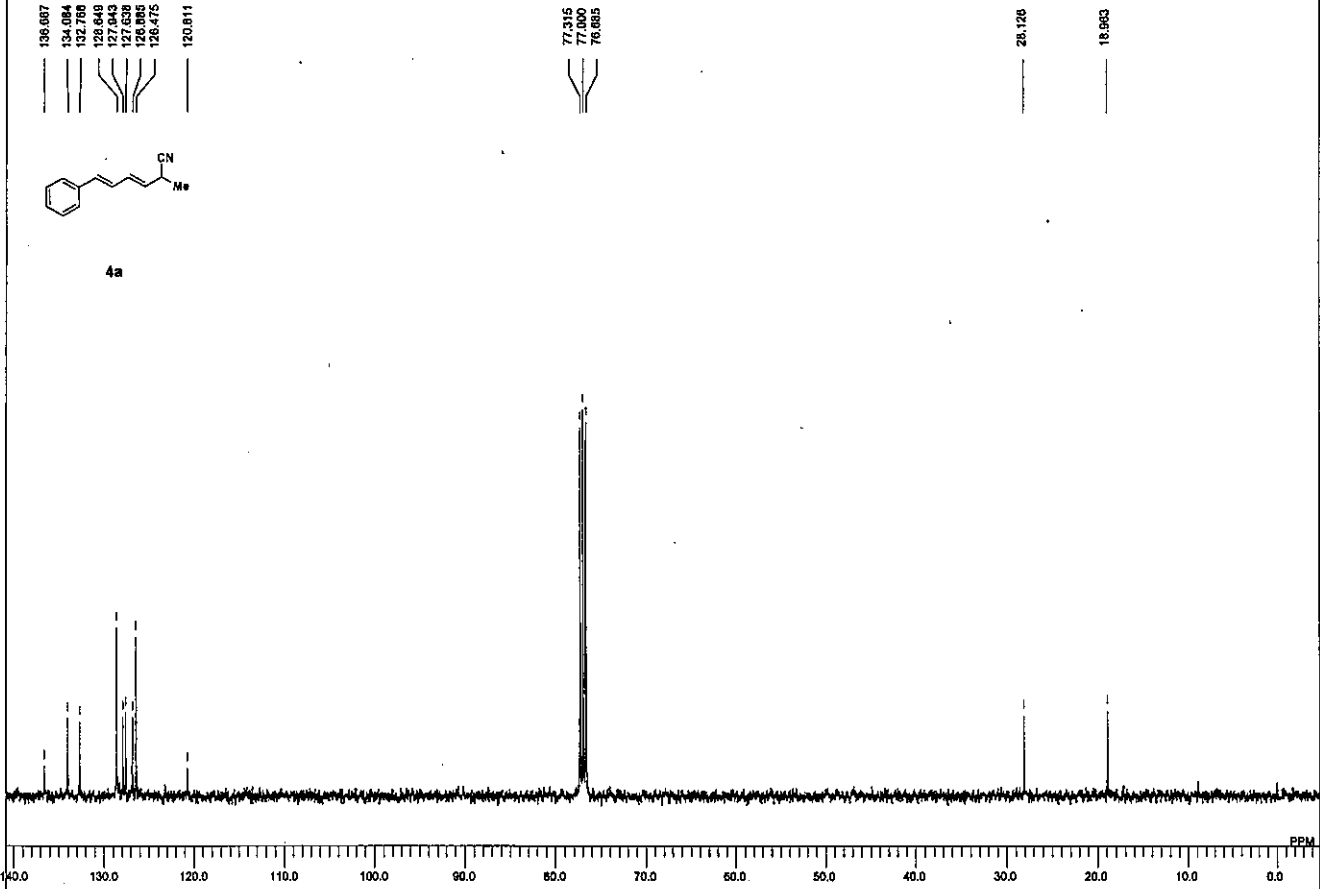

DFILE GSHH 1156\_c\_Car  
 COMNT single\_pulse decou  
 DATIM 2014-03-13 13:08:5  
 OBNUC 13C  
 EXMOD carbon.jpg  
 OBFRQ 100.53 MHz  
 OBSET 5.35 kHz  
 OBFIN 5.86 Hz  
 POINT 40950  
 FREQU 39258.79 Hz  
 SCANS 100  
 ACQTM 1.0433 sec  
 PD 2.0000 sec  
 IRNUC 3.02 usec  
 PW1  
 IRNUC  
 CTEMP 19.1 c  
 SLVNT CDCL3  
 EXREF 77.00 ppm  
 BF 0.12 Hz  
 RGAIN 50

single\_pulse  
D:\CEAI\1\H\1\1\horh1211261-1280\GSHH 12 68 pure Proton 8-1-1.kf

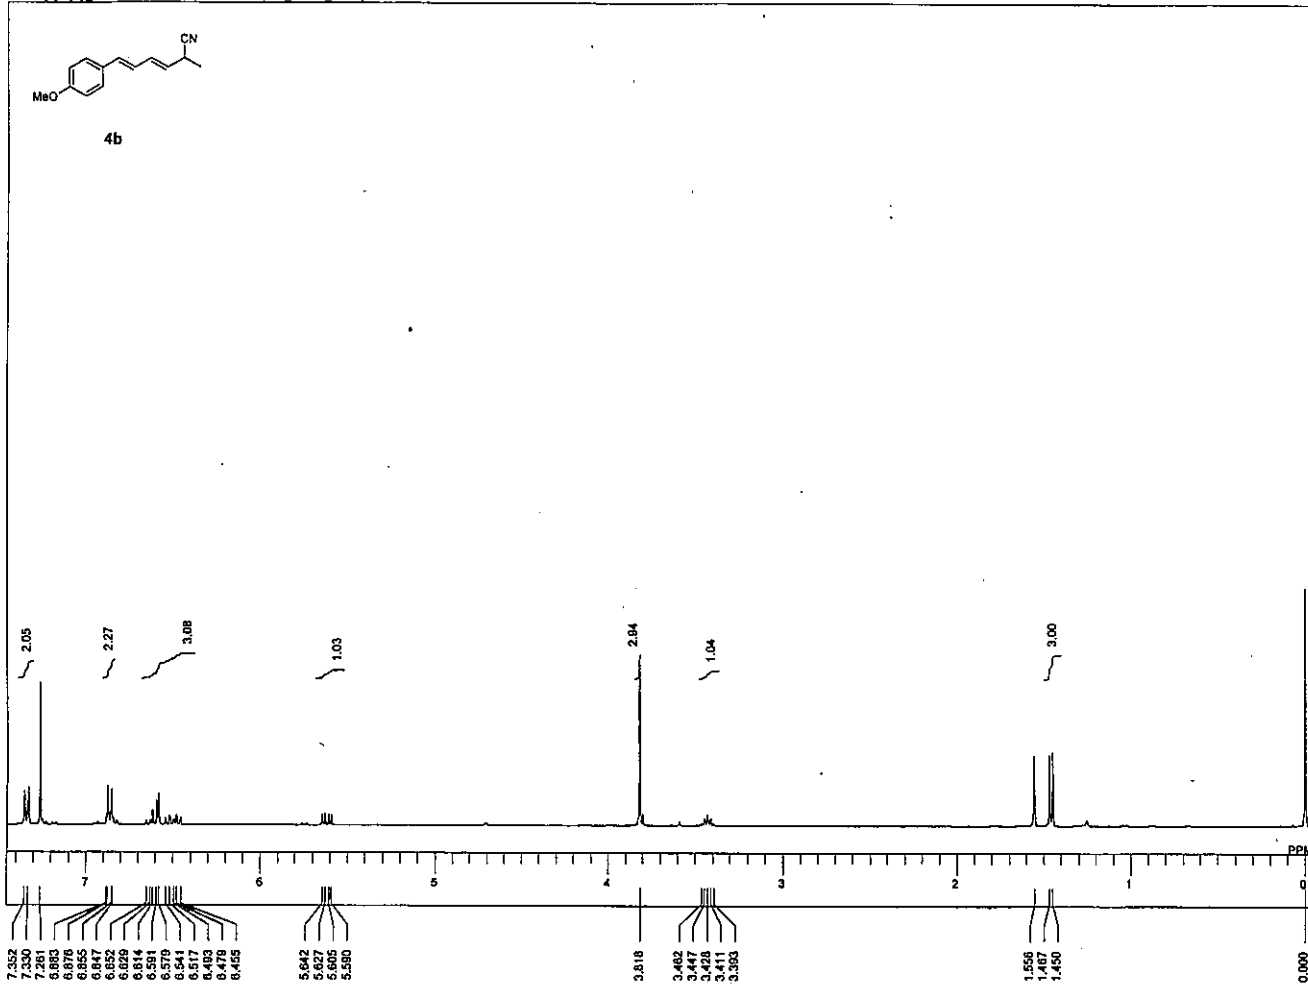

DFILE GSHH 12 68 pure\_1  
COMNT single\_pulse  
DATIM 2014-05-22 14:37:3  
OBNUC 1H  
EXMOD proton.jxp  
OBFRQ 399.78 MHz  
OBSET 4.19 KHz  
OBFIN 7.29 Hz  
POINT 20480  
FREQU 9378.75 Hz  
SCANS 8  
ACQTM 2.1837 sec  
PD 5.0000 sec  
PW1 5.01 usec  
IRNUC 1H  
CTEMP 20.3 c  
SLVNT CDCL3  
EXREF 0.00 ppm  
BF 1.20 Hz  
RGAIN 50

single pulse decoupled gated NOE  
D:\CEAI\1\H\1\1\horh1211261-1280\GSHH 12 68 c Carbon 8-1-1.kf

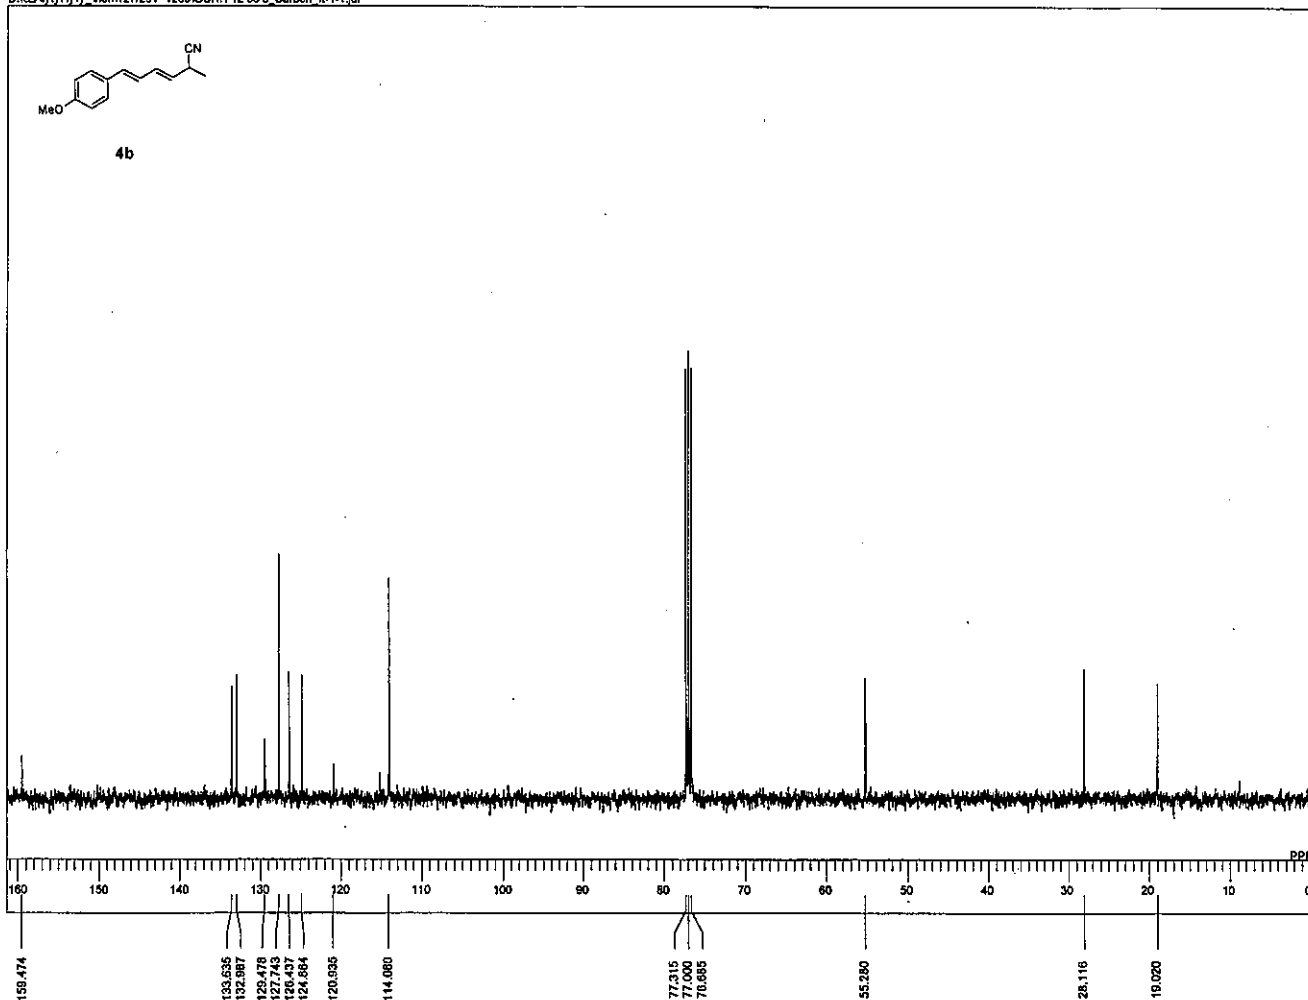

DFILE GSHH 12 68 c\_Car  
COMNT single\_pulse decou  
DATIM 2014-05-22 14:54:2  
OBNUC 13C  
EXMOD carbon.jxp  
OBFRQ 100.53 MHz  
OBSET 5.33 KHz  
OBFIN 5.88 Hz  
POINT 40960  
FREQU 39258.79 Hz  
SCANS 50  
ACQTM 1.0433 sec  
PD 2.0000 sec  
PW1 3.02 usec  
IRNUC 13C  
CTEMP 20.5 c  
SLVNT CDCL3  
EXREF 77.00 ppm  
BF 1.20 Hz  
RGAIN 50

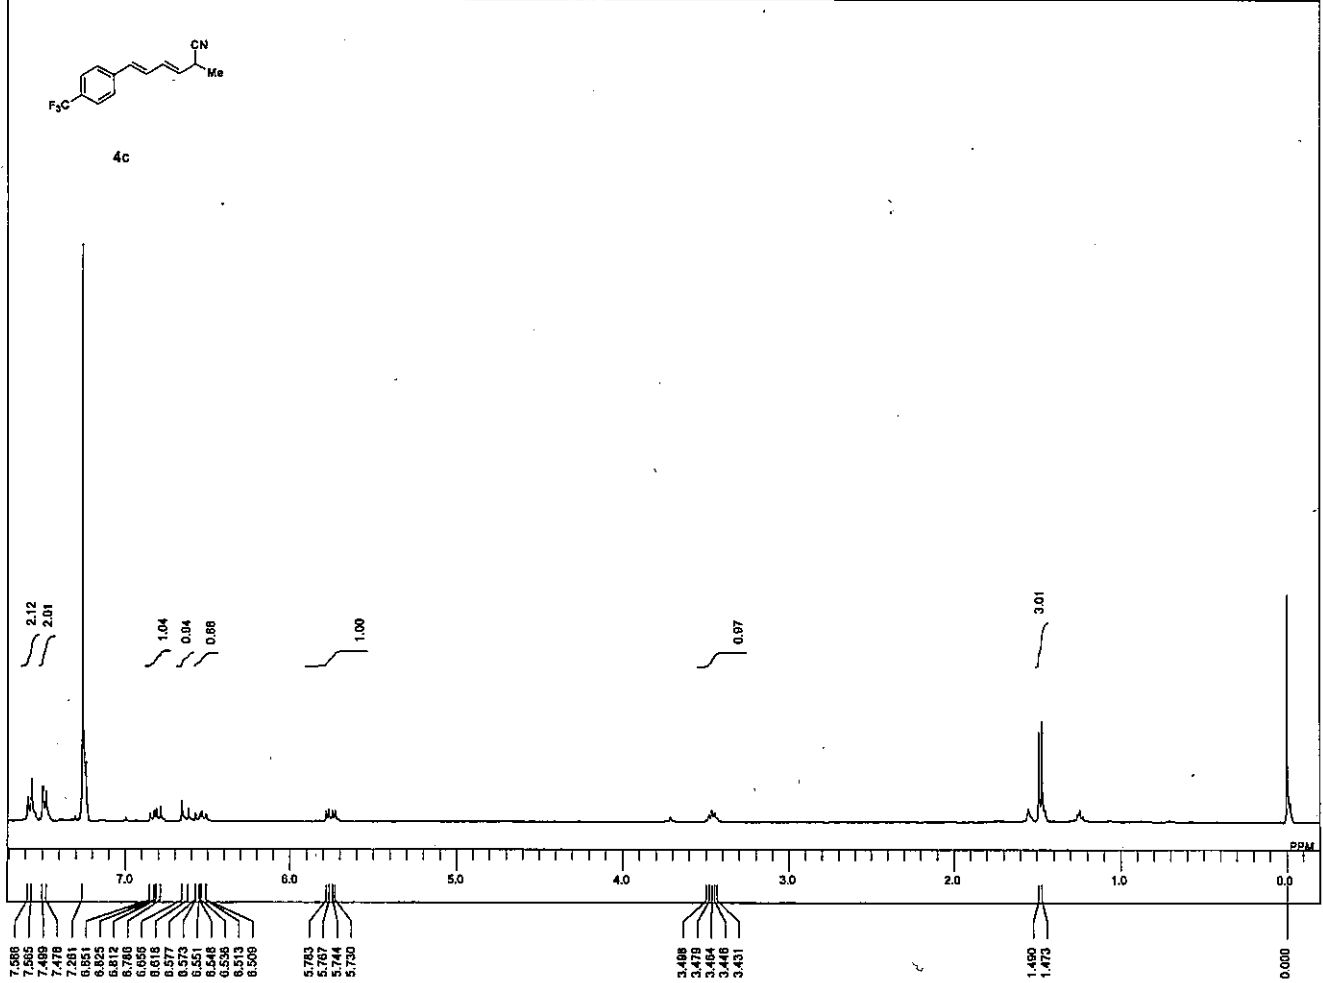

OFILE GSHH\_11\_67\_lm.1  
 COMNT  
 DATIM 2014-03-20 16:50:4  
 OBNUC 1H  
 EXMOD single\_pulse.exp  
 OBFRQ 399.78 MHz  
 OBSET 4.19 KHz  
 OBFIN 7.29 Hz  
 POINT 16384  
 FREQU 5998.80 Hz  
 SCANS 8  
 ACQTM 2.7312 sec  
 PD 2.0000 sec  
 PWI 6.00 usec  
 IRNUC  
 CTEMP 21.3 c  
 SLVNT CDCL3  
 EXREF 0.00 ppm  
 BF 0.12 Hz  
 RGAIN 18

single pulse decoupled gated NOE

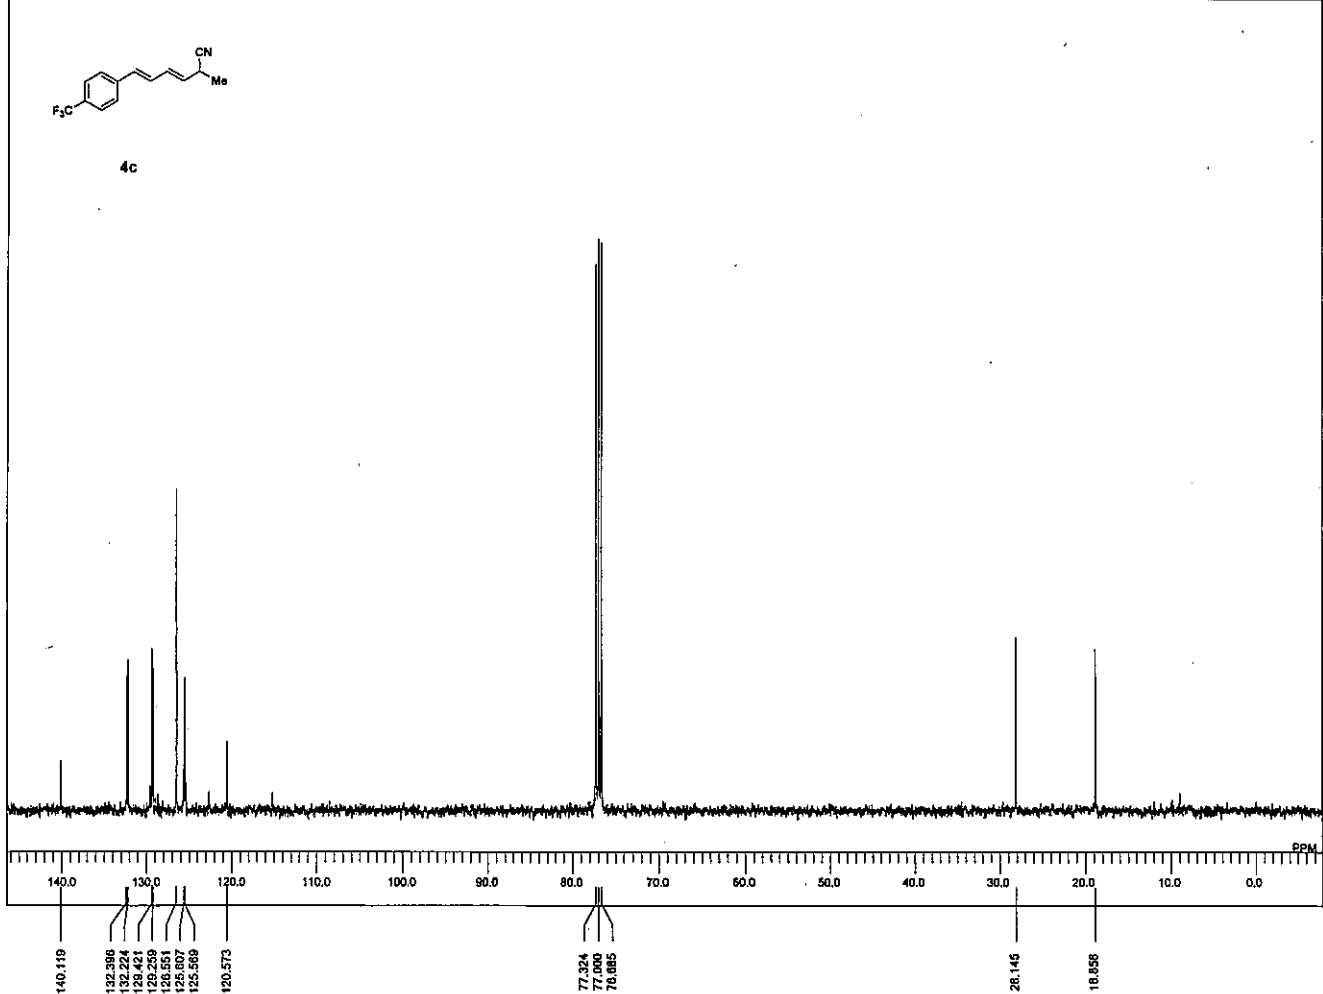

OFILE GSHH\_11\_cf3bn c\_1  
 COMNT single\_pulse\_decou  
 DATIM 2014-03-20 18:46:2  
 OBNUC 13C  
 EXMOD carbon.jcp  
 OBFRQ 100.63 MHz  
 OBSET 5.35 KHz  
 OBFIN 5.88 Hz  
 POINT 40960  
 FREQU 39258.79 Hz  
 SCANS 200  
 ACQTM 1.0433 sec  
 PD 2.0000 sec  
 PWI 3.02 usec  
 IRNUC 1H  
 CTEMP 18.5 c  
 SLVNT CDCL3  
 EXREF 77.00 ppm  
 BF 0.12 Hz  
 RGAIN 50

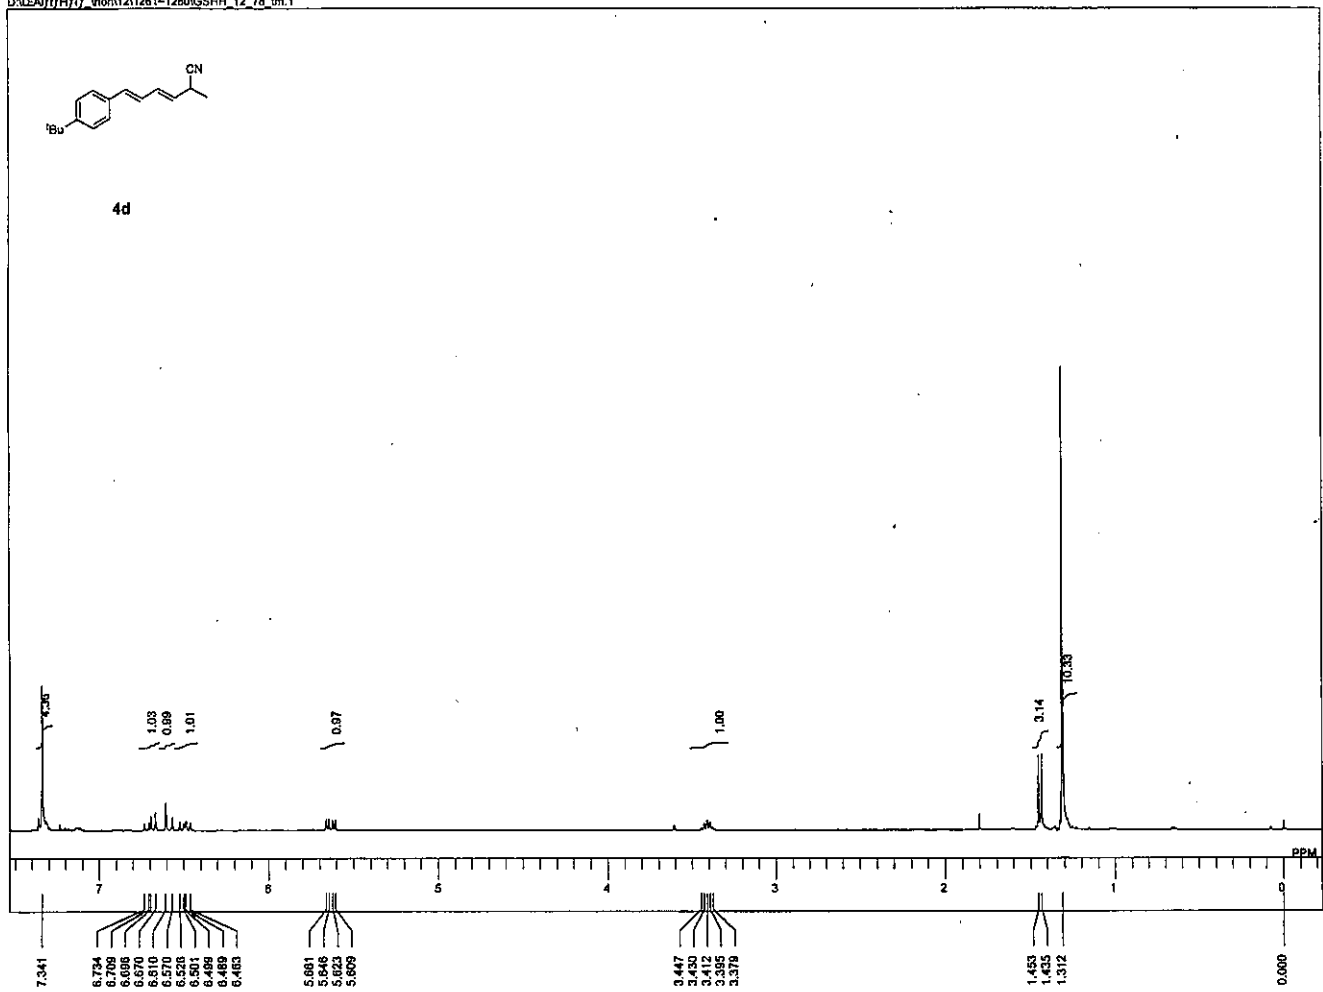

OFILE GSHH\_12\_78\_lm.1  
 COMNT 2014-05-26 19:02:2  
 DATIM 1H  
 OBNUC single\_pulse\_exp  
 EXMOD 395.78 MHz  
 OBFRQ 4.19 KHz  
 OBSET 7.29 Hz  
 OBFIN 16384  
 POINT 5998.80 Hz  
 FREQU 8  
 SCANS 2.7312 sec  
 ACQTM 2.0000 sec  
 PD 6.70 usec  
 PWI IRNUC  
 CTEMP 22.6 c  
 SLVNT CDCL3  
 EXREF 0.00 ppm  
 BF 0.12 Hz  
 RGAIN 8

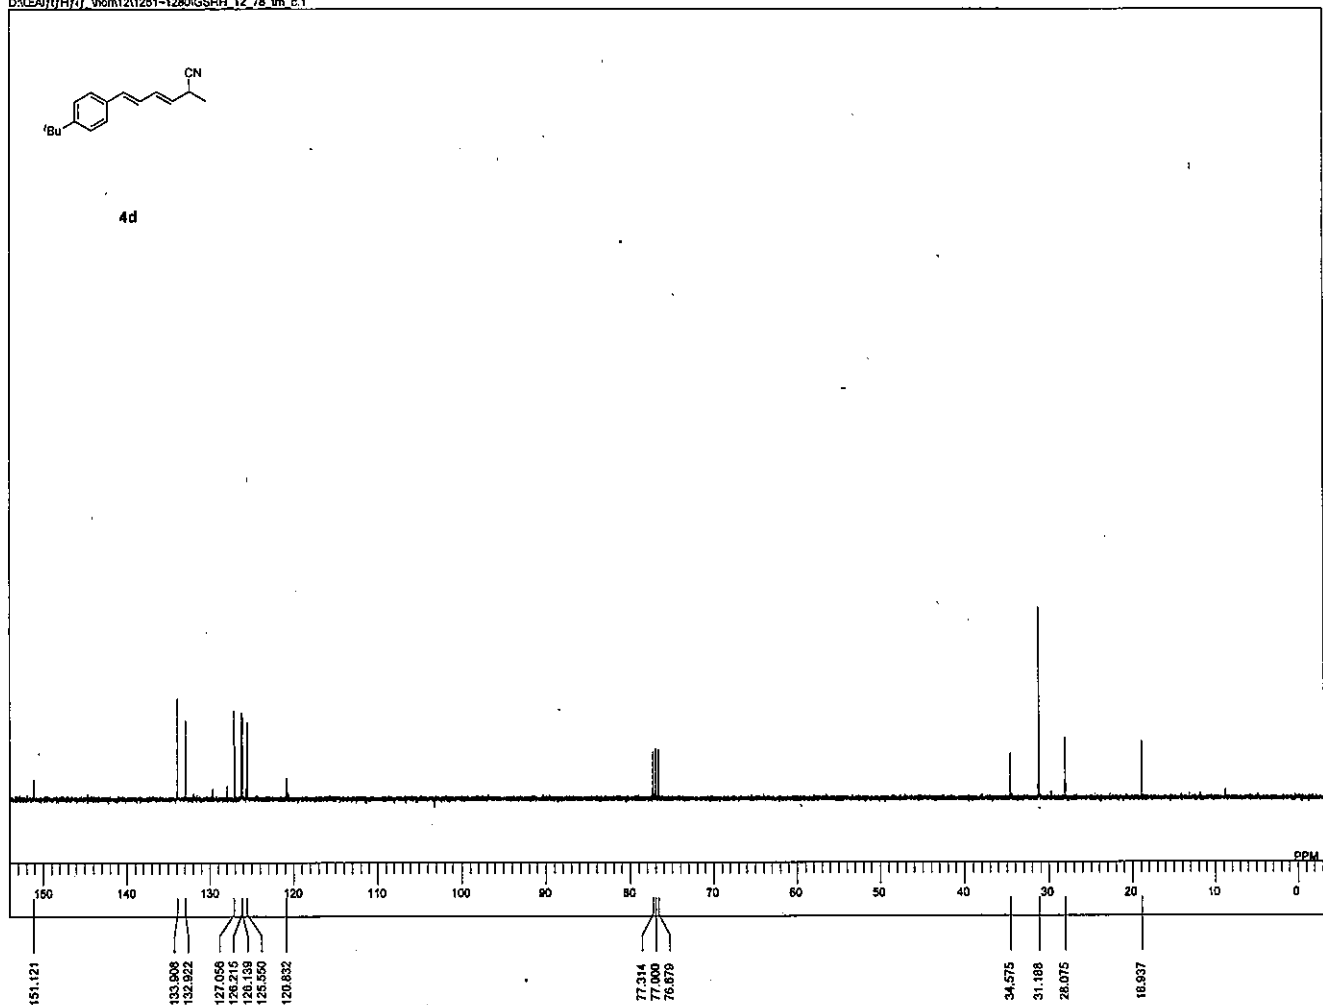

OFILE GSHH\_12\_78\_lm.c  
 COMNT 2014-05-26 19:05:5  
 DATIM 13C  
 OBNUC single\_pulse\_dec  
 EXMOD 100.53 MHz  
 OBFRQ 5.35 KHz  
 OBSET 5.86 Hz  
 OBFIN 32768  
 POINT 25188.92 Hz  
 FREQU 50  
 SCANS 1.3009 sec  
 ACQTM 1.0000 sec  
 PD 3.33 usec  
 PWI IRNUC  
 CTEMP 23.4 c  
 SLVNT CDCL3  
 EXREF 77.00 ppm  
 BF 0.12 Hz  
 RGAIN 24



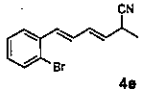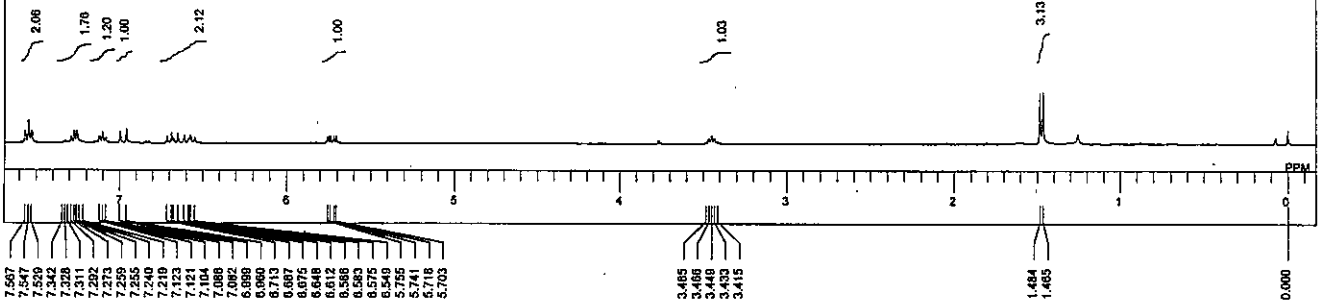

DFILE GSHH\_12\_77\_tm.1  
 COMNT 2014-05-26 18:55:1  
 DATIM 1H  
 OBNUC single\_pulse.exp  
 EXMOD 399.76 MHz  
 OBFRQ 4.18 KHz  
 OBSET 7.29 Hz  
 OBFIN 16384  
 POINT 5998.80 Hz  
 FREQU 8  
 SCANS 2.7312 sec  
 ACQTM 2.0000 sec  
 PD 6.70 usec  
 IRNUC  
 CTEMP 22.4 c  
 SLVNT CDCL3  
 EXREF 0.00 ppm  
 BF 0.12 Hz  
 RGAIN 13

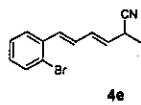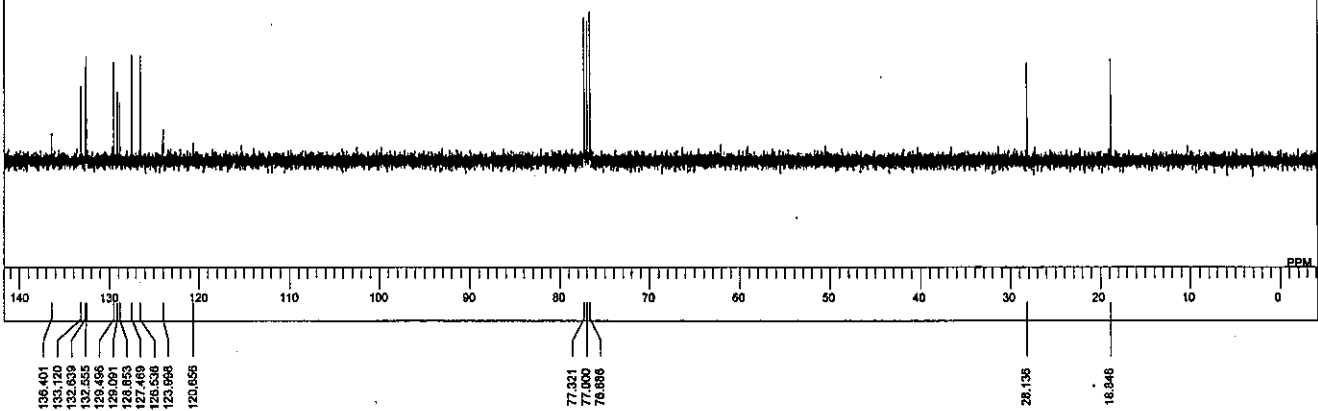

DFILE GSHH\_12\_77\_tm.c.1  
 COMNT 2014-05-26 18:59:0  
 DATIM 13C  
 OBNUC single\_pulse\_dec  
 EXMOD 100.53 MHz  
 OBFRQ 5.35 KHz  
 OBSET 5.86 Hz  
 OBFIN 32768  
 POINT 25188.92 Hz  
 FREQU 50  
 SCANS 1.3008 sec  
 ACQTM 1.0000 sec  
 PD 3.33 usec  
 IRNUC 1H  
 CTEMP 23.3 c  
 SLVNT COCL3  
 EXREF 77.00 ppm  
 BF 0.12 Hz  
 RGAIN 24

DFILE GSHH\_12\_76\_lm.1  
 COMNT  
 DATIM 2014-05-26 18:50:0  
 OBNUC 1H  
 EXMOD single\_pulse.exp  
 OBFRQ 399.76 MHz  
 OBSSET 4.19 KHz  
 OBFIN 7.29 Hz  
 POINT 18384  
 FREQU 5998.80 Hz  
 SCANS 8  
 ACQTM 2.7312 sec  
 PD 2.0000 sec  
 PW1 6.70 usec  
 IRNUC  
 CTEMP 22.3 c  
 SLVNT CDCL3  
 EXREF 0.00 ppm  
 BF 0.12 Hz  
 RGAIN 12

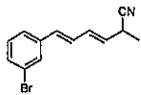

4f

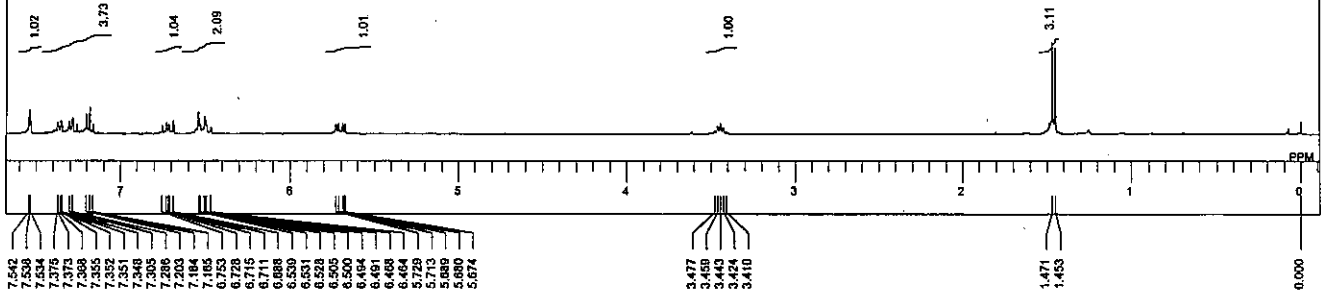

DFILE GSHH\_12\_76\_lm\_1  
 COMNT  
 DATIM 2014-05-26 18:53:0  
 OBNUC 13C  
 EXMOD single\_pulse\_dec  
 OBFRQ 100.53 MHz  
 OBSSET 5.35 KHz  
 OBFIN 5.86 Hz  
 POINT 32760  
 FREQU 25188.92 Hz  
 SCANS 50  
 ACQTM 1.3009 sec  
 PD 1.0000 sec  
 PW1 3.33 usec  
 IRNUC 1H  
 CTEMP 23.2 c  
 SLVNT CDCL3  
 EXREF 77.00 ppm  
 BF 0.12 Hz  
 RGAIN 24

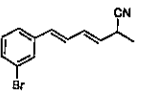

4f

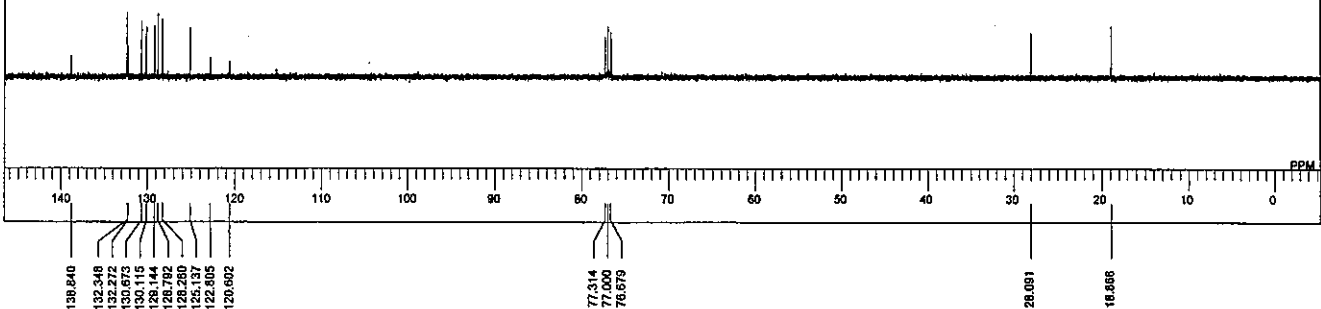

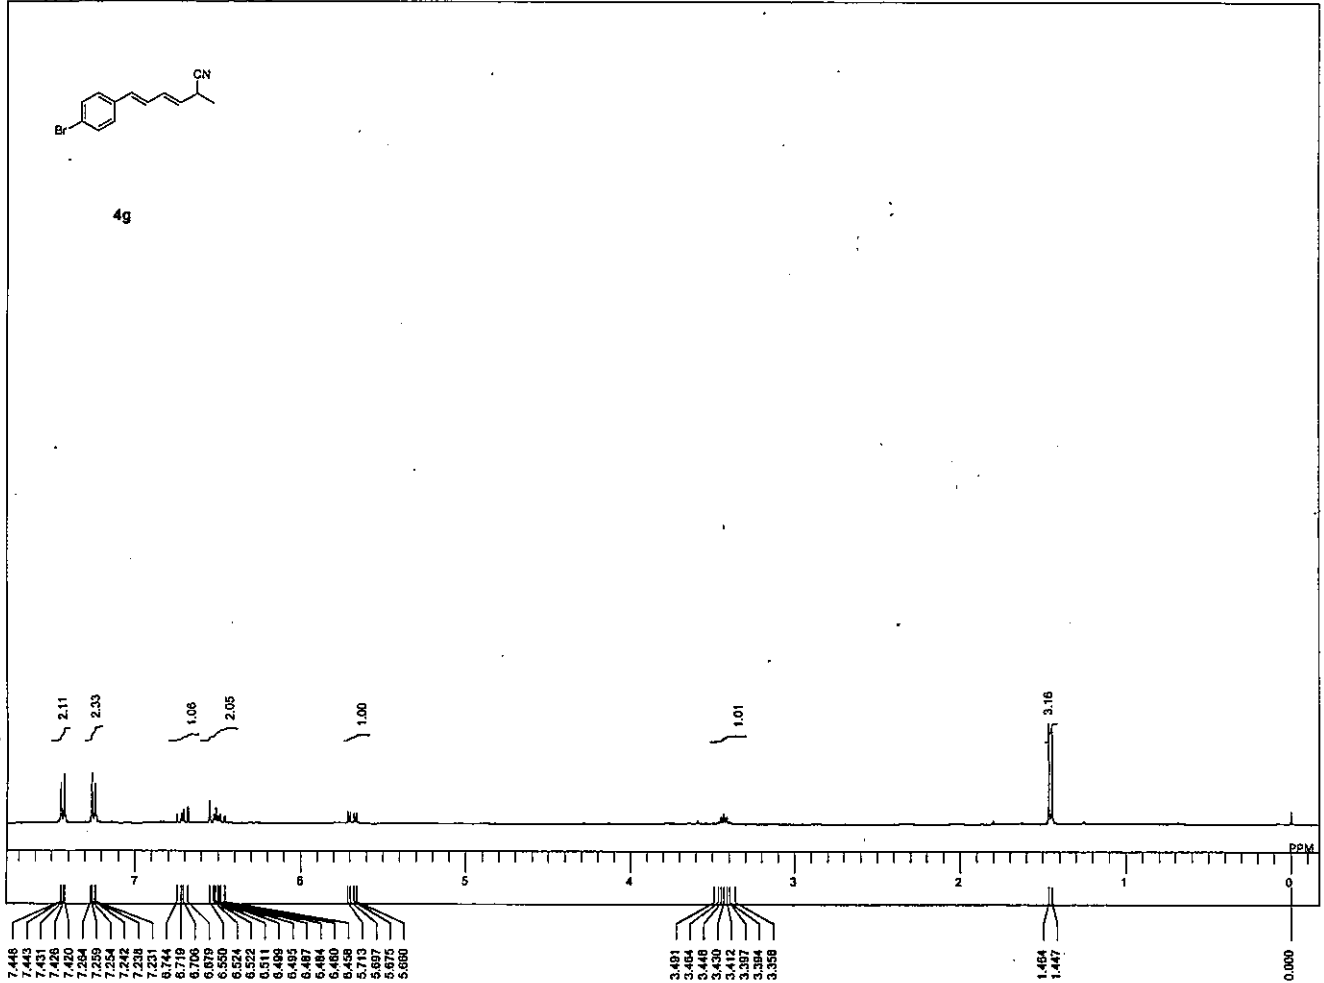

DFILE GSHH\_12\_75\_tm.1  
 COMNT  
 DATIM 2014-05-26 16:44:01  
 OBNUC 1H  
 EXMOD single\_pulse\_exp  
 OBFRQ 399.78 MHz  
 OBSSET 4.19 KHz  
 OBFIN 7.29 Hz  
 POINT 16384  
 FREQU 5998.80 Hz  
 SCANS 8  
 ACQTM 2.7312 sec  
 PD 2.0000 sec  
 PW1  
 IRNUC 5.70 usec  
 CTEMP 21.9 c  
 SLVNT CDCL3  
 EXREF 0.00 ppm  
 BF 0.12 Hz  
 RGAIN 11

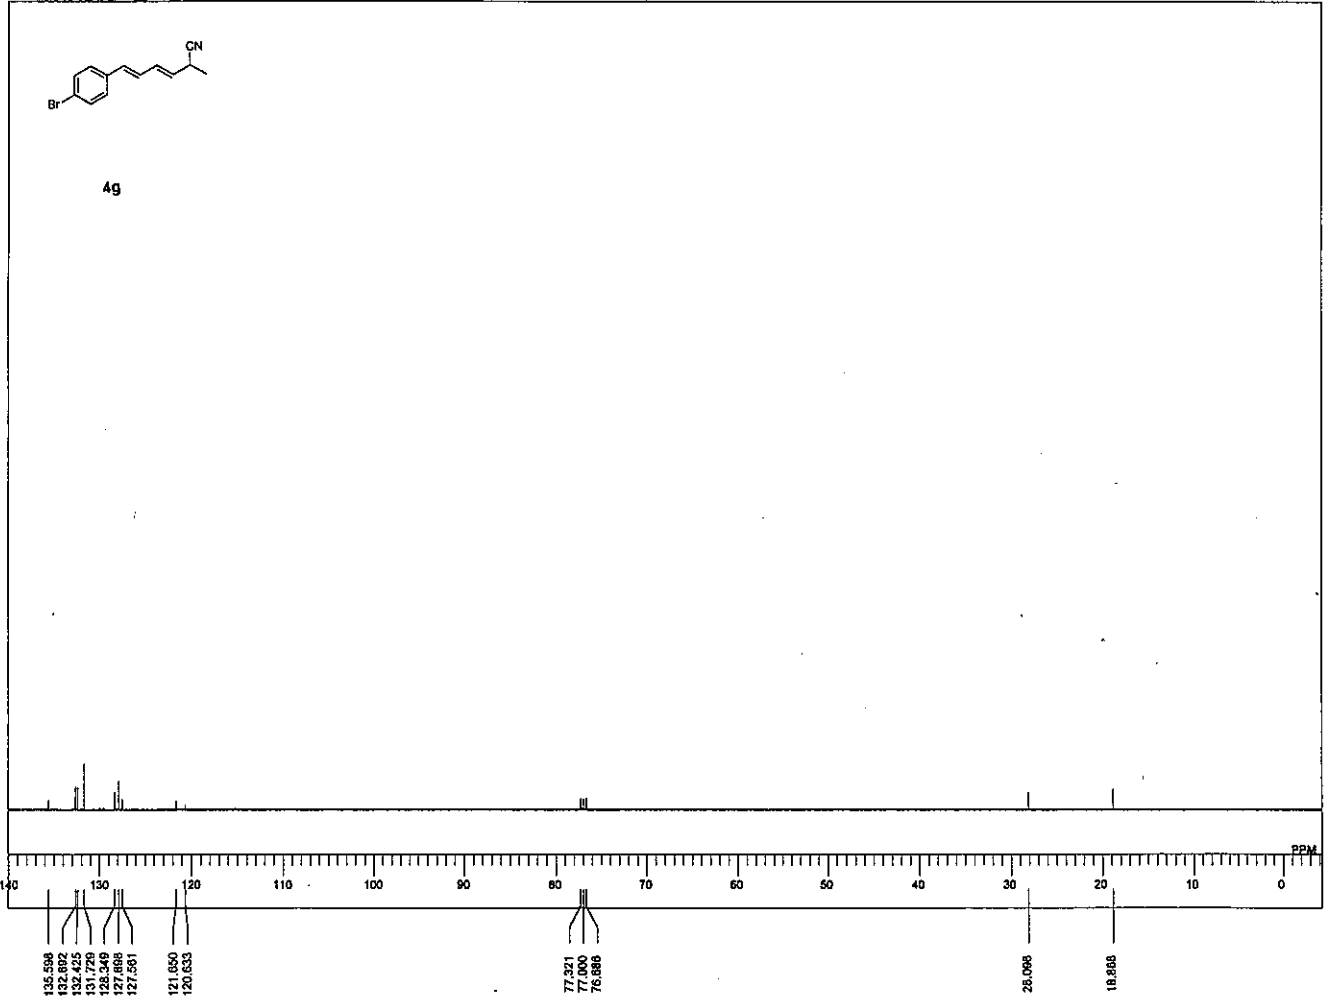

DFILE GSHH\_12\_75\_tm.c.1  
 COMNT  
 DATIM 2014-05-26 16:47:0  
 OBNUC 13C  
 EXMOD single\_pulse\_dec  
 OBFRQ 100.63 MHz  
 OBSSET 5.35 KHz  
 OBFIN 5.88 Hz  
 POINT 32768  
 FREQU 25188.92 Hz  
 SCANS 50  
 ACQTM 1.3009 sec  
 PD 1.0000 sec  
 PW1 3.33 usec  
 IRNUC 1H  
 CTEMP 23.0 c  
 SLVNT CDCL3  
 EXREF 77.00 ppm  
 BF 0.12 Hz  
 RGAIN 24

D:\CE\1\13\1301-1320\GSHH\_13\_04\_tm\_pure h.1

|       |                     |
|-------|---------------------|
| DFILE | GSHH_13_04_tm_j     |
| COMNT | 1H                  |
| DATIM | 2014-05-28 16:13:41 |
| OBNUC | 13C                 |
| EXMOD | single_pulse_exp    |
| OBFRQ | 399.78 MHz          |
| OBSET | 4.19 KHz            |
| OBFIN | 7.29 Hz             |
| POINT | 18384               |
| FREQU | 5998.80 Hz          |
| SCANS | 8                   |
| ACQTM | 2.7312 sec          |
| PD    | 2.0000 sec          |
| PW1   | 6.70 usec           |
| IRNUC | 1H                  |
| CTEMP | 20.4 c              |
| SLVNT | CDCL3               |
| EXREF | 0.00 ppm            |
| BF    | 0.12 Hz             |
| RGAIN | 13                  |

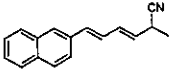

4h

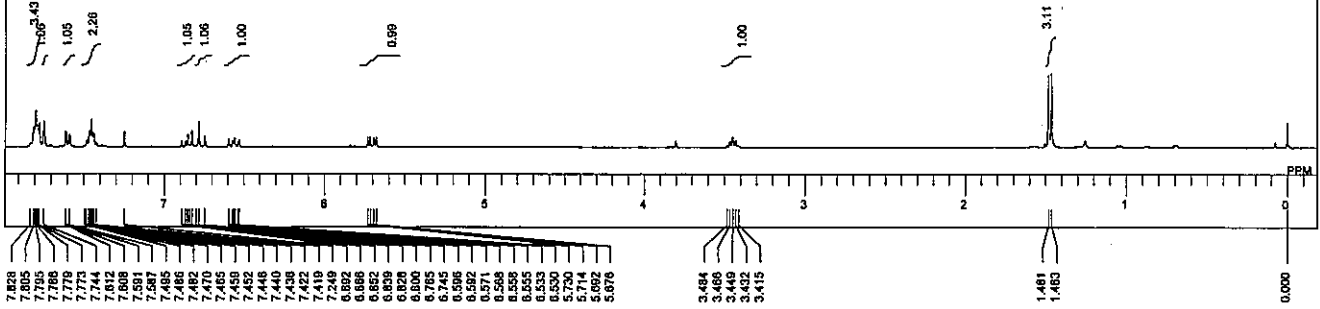

D:\CE\1\13\1301-1320\GSHH\_13\_04\_tm\_pure c.1

|       |                    |
|-------|--------------------|
| DFILE | GSHH_13_04_tm_j    |
| COMNT | 13C                |
| DATIM | 2014-05-28 16:20:5 |
| OBNUC | 13C                |
| EXMOD | single_pulse_dec   |
| OBFRQ | 100.53 MHz         |
| OBSET | 5.35 KHz           |
| OBFIN | 5.88 Hz            |
| POINT | 32768              |
| FREQU | 25188.02 Hz        |
| SCANS | 110                |
| ACQTM | 1.3009 sec         |
| PD    | 1.0000 sec         |
| PW1   | 3.33 usec          |
| IRNUC | 1H                 |
| CTEMP | 21.8 c             |
| SLVNT | CDCL3              |
| EXREF | 77.00 ppm          |
| BF    | 0.12 Hz            |
| RGAIN | 24                 |

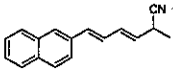

4h

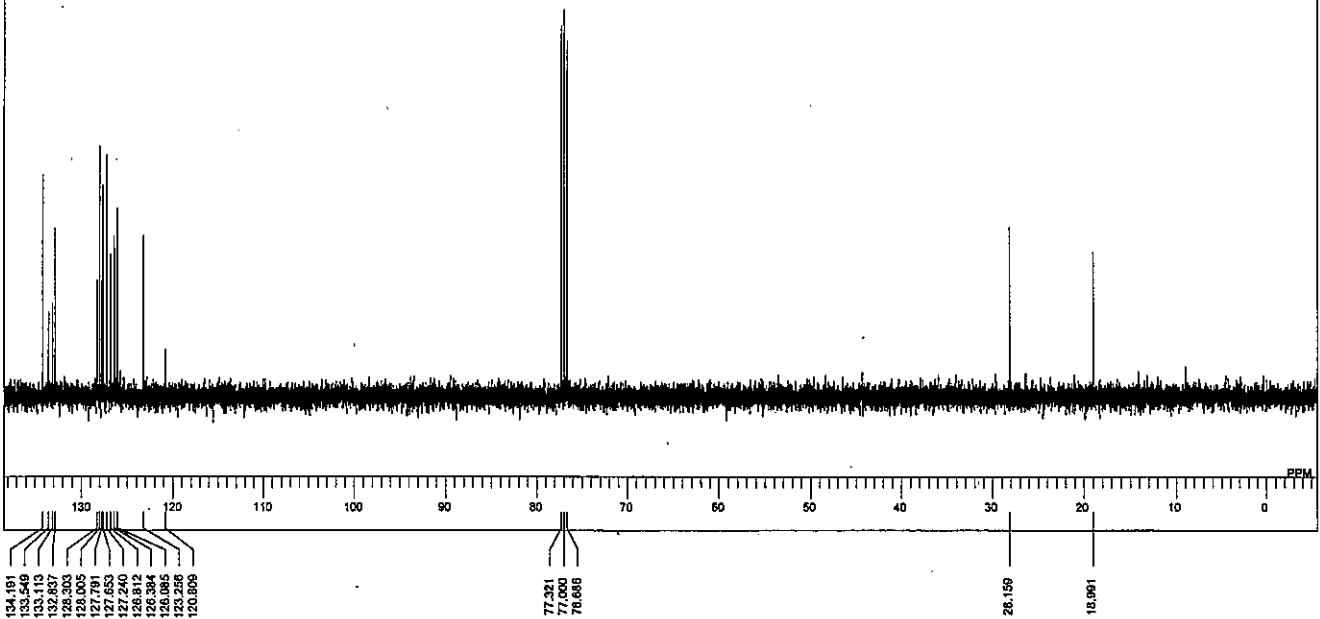

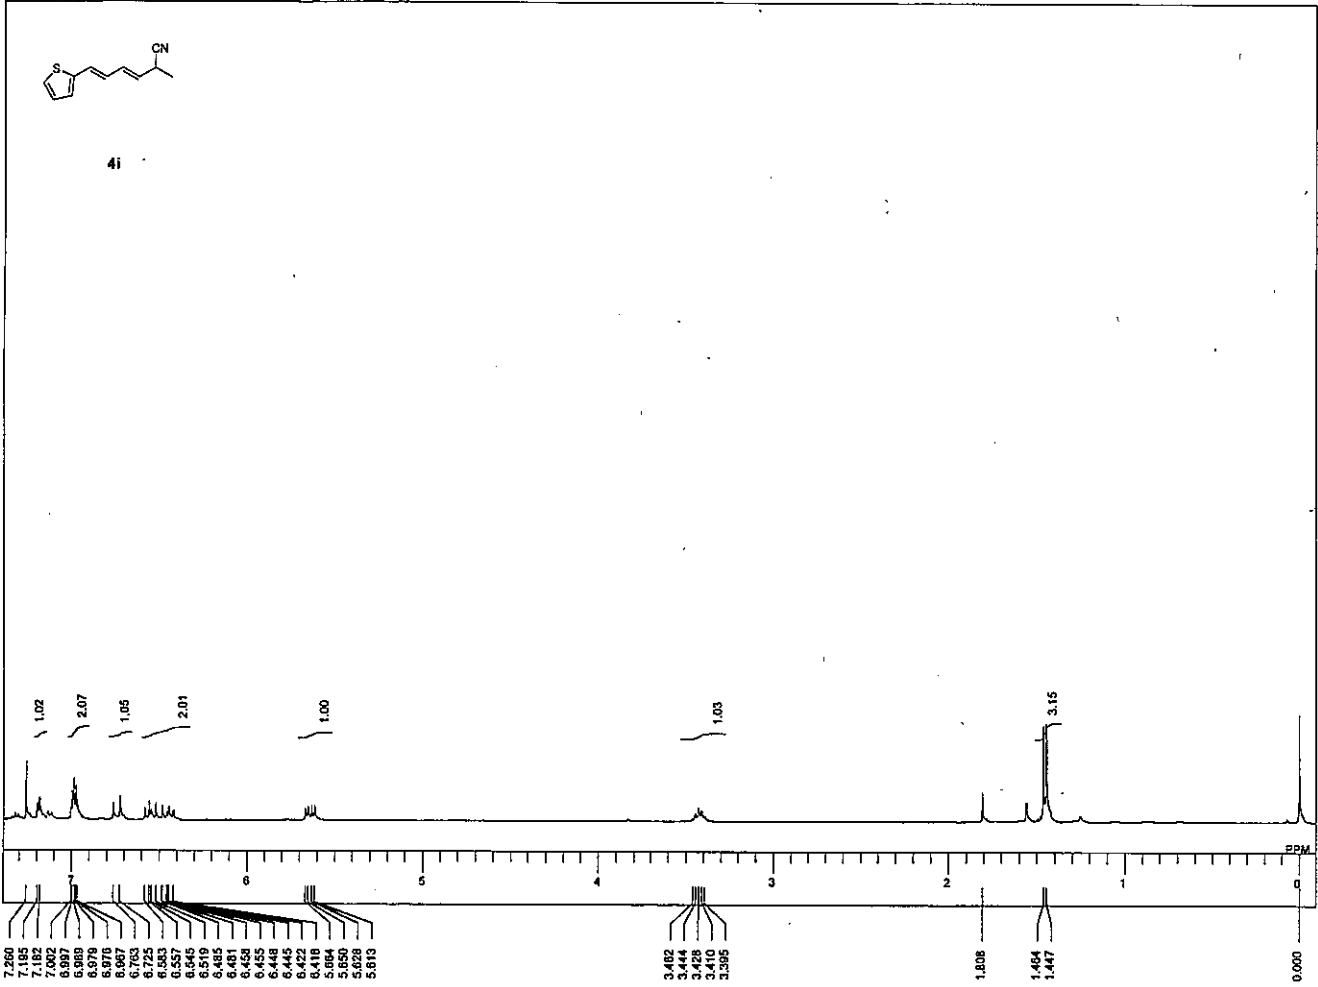

DFILE GSHH 13 07 tm\_Pr  
COMNT single\_pulse  
DATM 2014-05-28 20:26:0  
OBNUC 1H  
EXMCD proton.jsp  
OBFRQ 399.78 MHz  
OBSET 4.19 KHz  
OBFIN 7.29 Hz  
POINT 16384  
FREQU 7503.00 Hz  
SCANS 8  
ACQTM 2.1837 sec  
PD 5.0000 sec  
PWI 5.01 usec  
IRNUC 1H  
CYEMP 20.5 c  
SLVNT CDCL3  
EXREF 0.00 ppm  
BF 3.00 Hz  
RGAIN 46

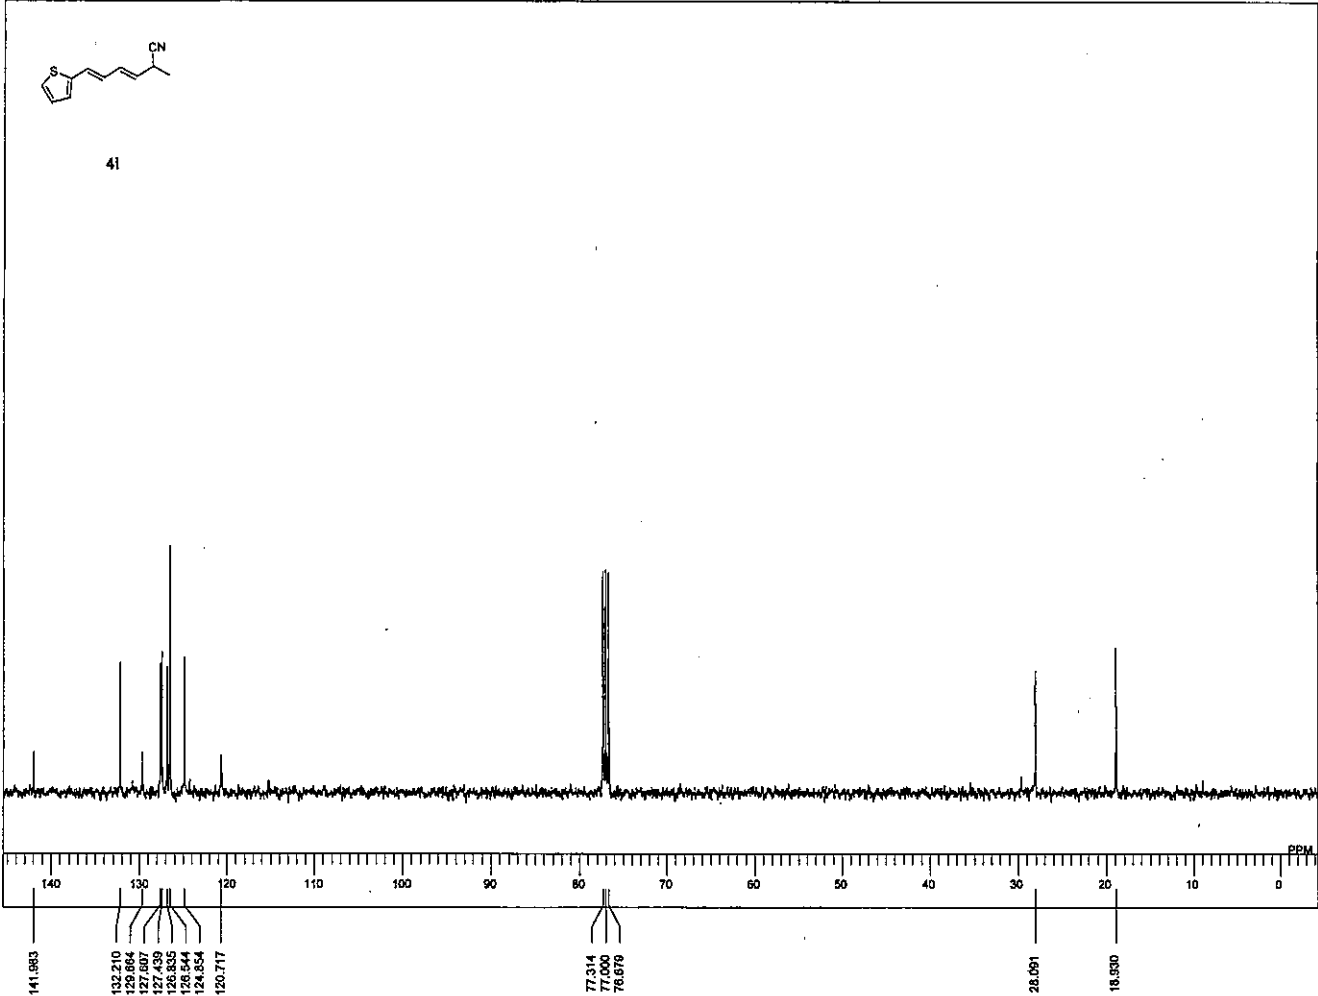

DFILE GSHH\_13\_0x\_s\_tm  
COMNT  
DATM 2014-05-28 20:03:4  
OBNUC 13C  
EXMCD single\_pulse\_dec  
OBFRQ 100.63 MHz  
OBSET 5.35 KHz  
OBFIN 5.95 Hz  
POINT 32768  
FREQU 25188.92 Hz  
SCANS 100  
ACQTM 1.3009 sec  
PD 1.0000 sec  
PWI 3.33 usec  
IRNUC 1H  
CYEMP 21.5 c  
SLVNT CDCL3  
EXREF 77.00 ppm  
BF 3.00 Hz  
RGAIN 24

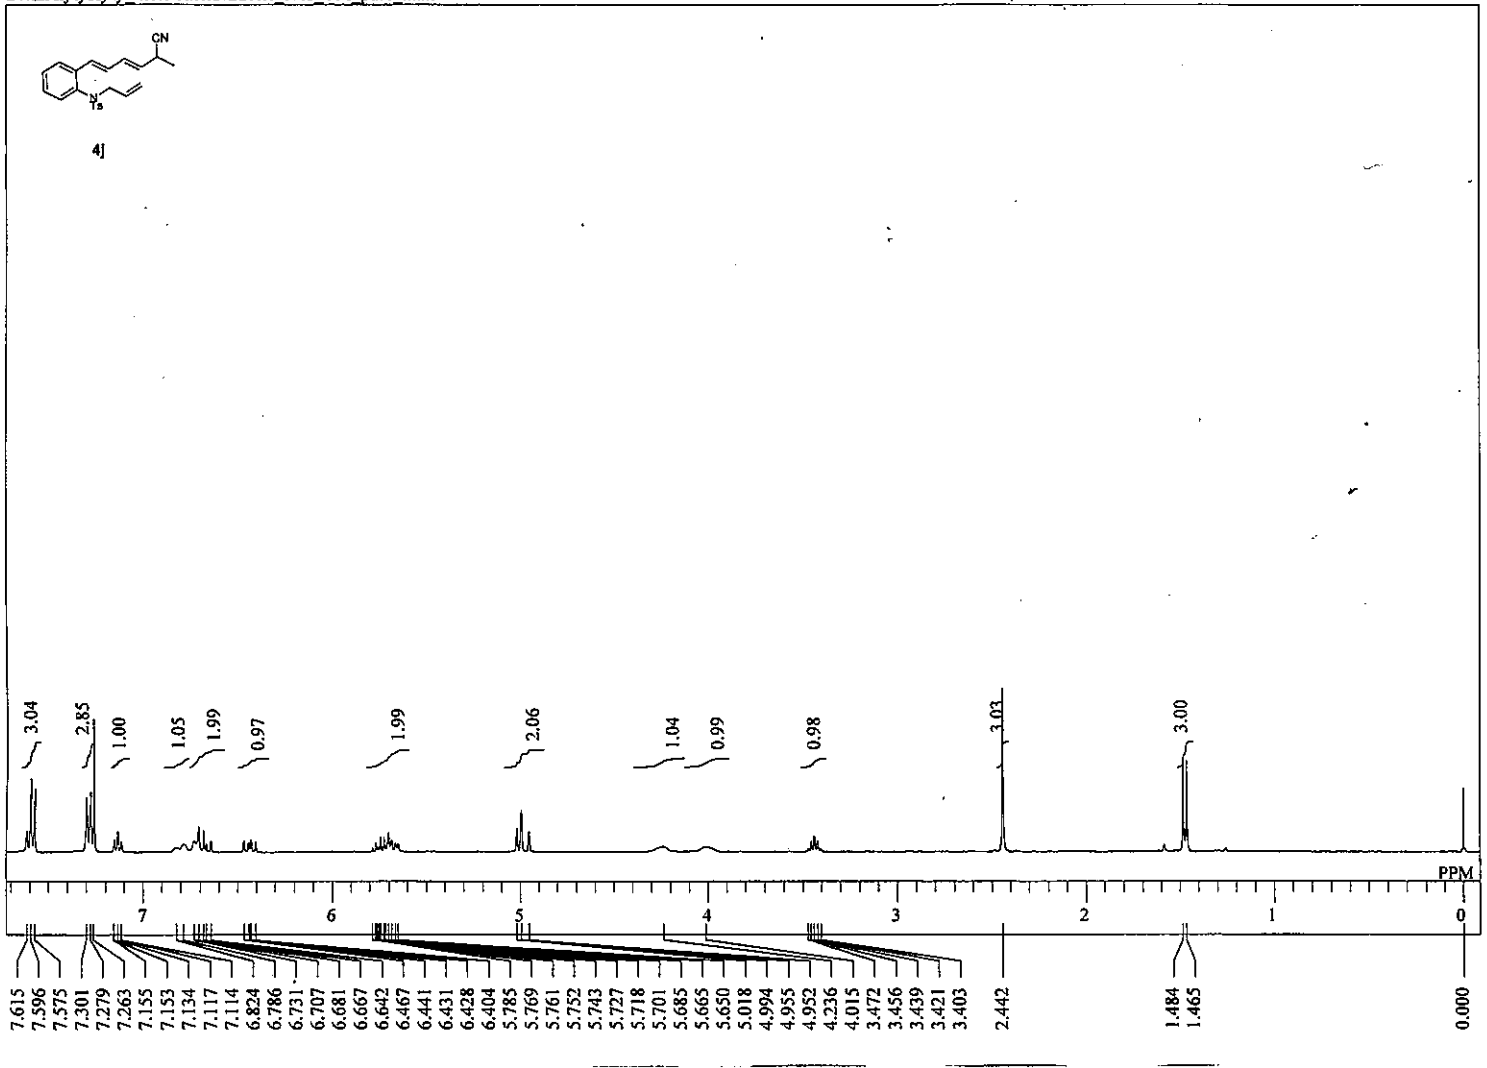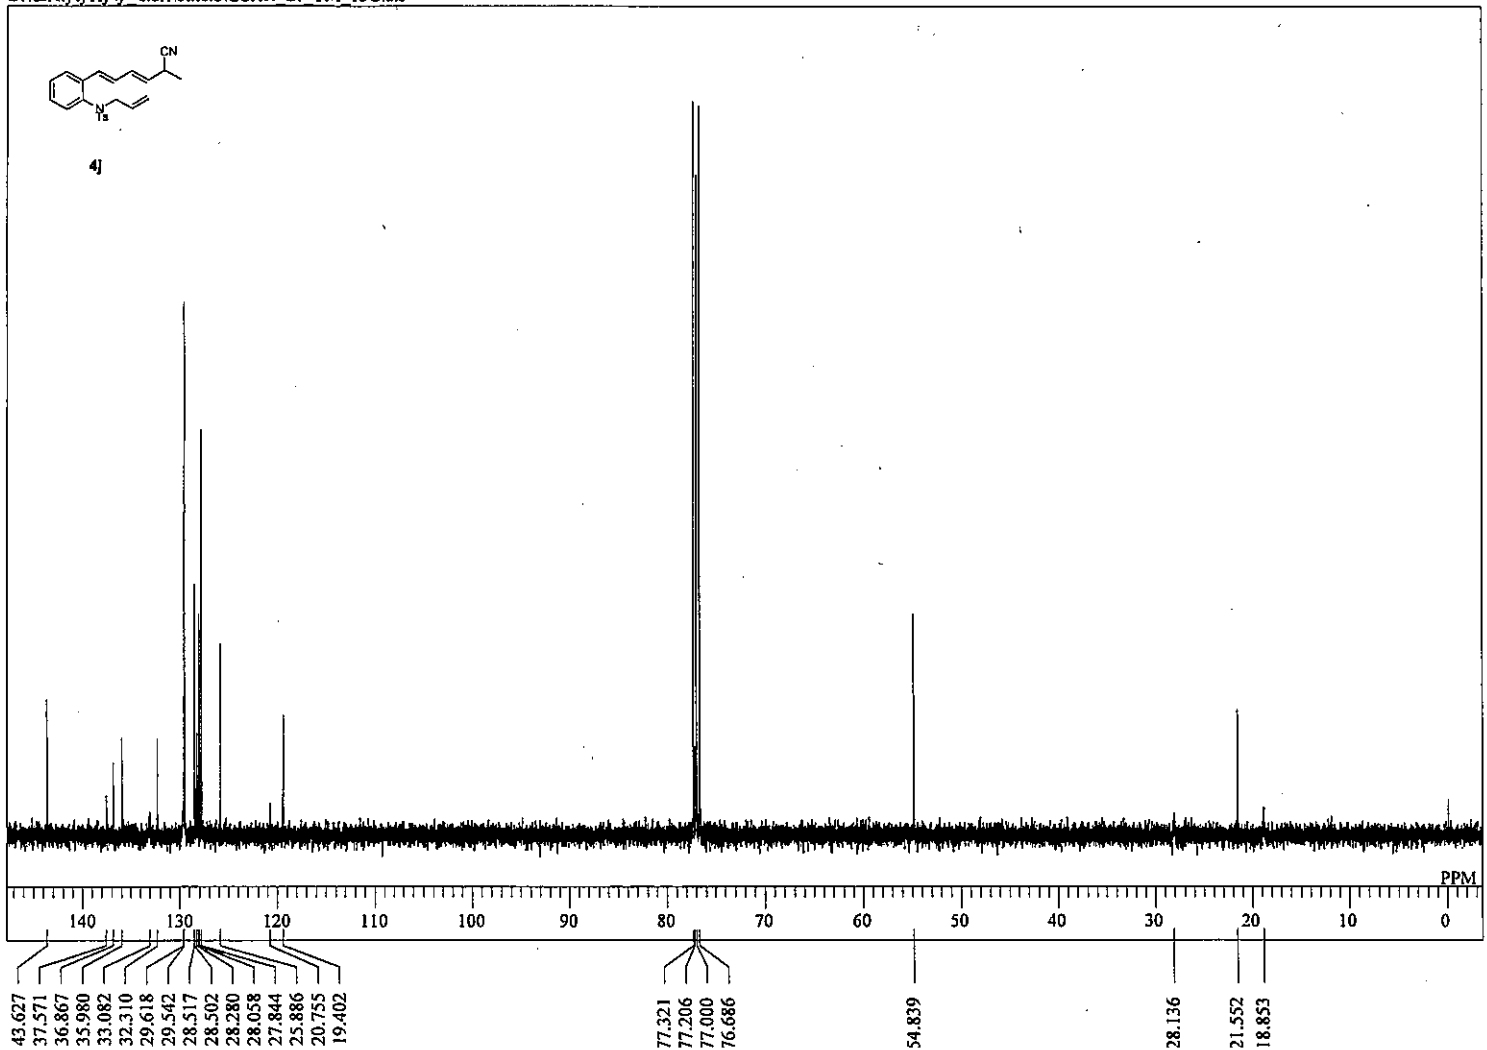

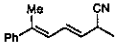

4k

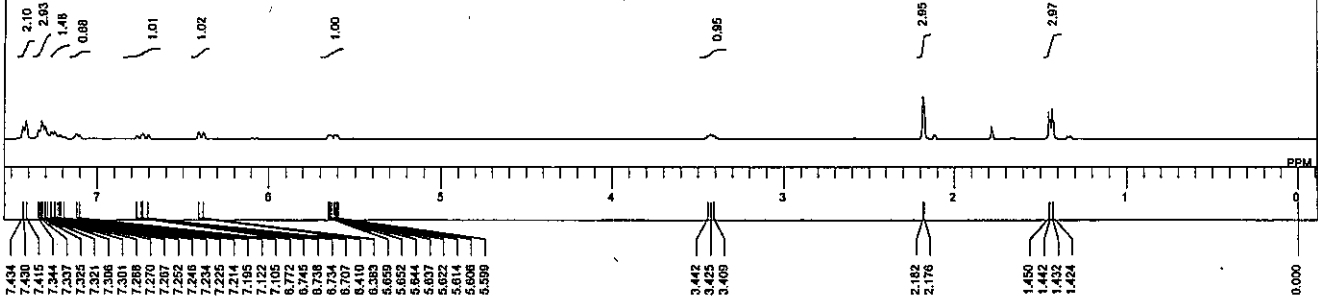

DFILE GSHH 15 26 pure\_1  
 COMNT single\_pulse  
 DATIM 2014-09-30 11:24:2  
 OBNUC 1H  
 EXMOD proton.jxp  
 OBFRQ 399.78 MHz  
 OBSET 4.19 KHz  
 OBFIN 7.29 Hz  
 POINT 29480  
 FREQU 9378.75 Hz  
 SCANS 1  
 ACQTM 2.4837 sec  
 PD 5.0000 sec  
 PWI 5.01 usec  
 IRNUC 1H  
 CTMP 20.8 c  
 SLVNT CDCL3  
 EXREF 0.00 ppm  
 BF 0.12 Hz  
 RGAIN 24

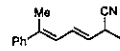

4k

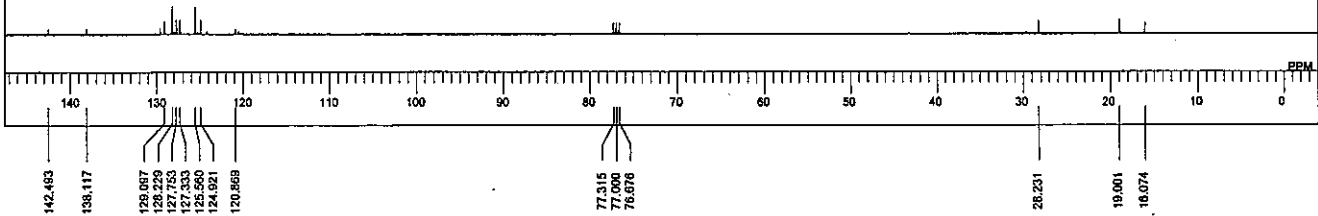

DFILE GSHH 15 26 pure\_1  
 COMNT single\_pulse\_decou  
 DATIM 2014-09-30 11:25:1  
 OBNUC 13C  
 EXMOD carbon.jxp  
 OBFRQ 100.63 MHz  
 OBSET 5.35 KHz  
 OBFIN 5.89 Hz  
 POINT 32769  
 FREQU 31407.04 Hz  
 SCANS 100  
 ACQTM 1.0433 sec  
 PD 2.0000 sec  
 PWI 3.02 usec  
 IRNUC 1H  
 CTMP 21.0 c  
 SLVNT CDCL3  
 EXREF 77.00 ppm  
 BF 0.12 Hz  
 RGAIN 50





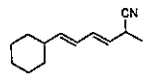

4i

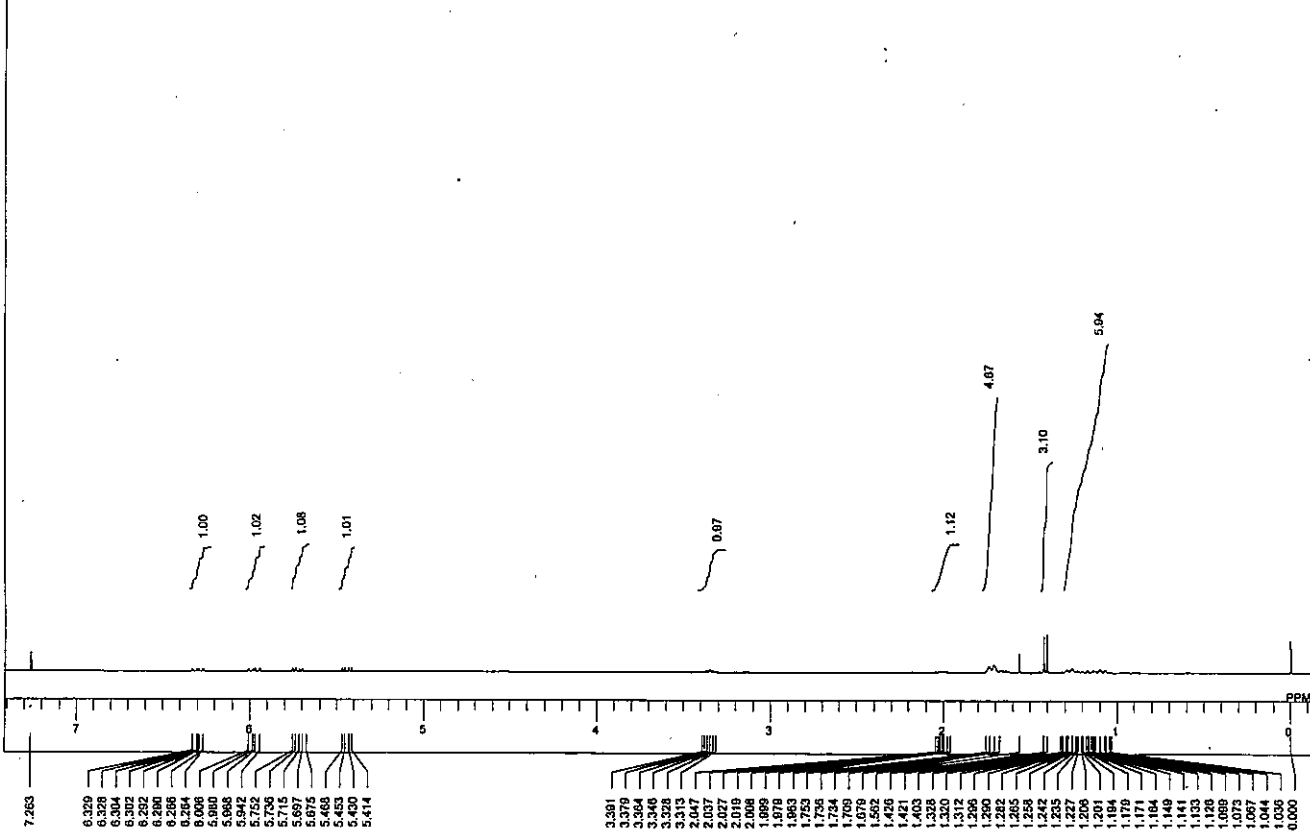

DFILE GSHH\_15\_54\_p1.f  
 COMNT 2014-10-20 14:32:4  
 DATIM single\_pulse.exp  
 OBNUC 1H  
 EXMOD 399.78 MHz  
 OBFRQ 4.19 KHz  
 OBSET 7.29 Hz  
 POINT 16384  
 FREQU 5995.80 Hz  
 SCANS 5  
 ACQTM 2.7312 sec  
 PD 2.0000 sec  
 PWI 5.75 usec  
 IRNUC  
 CTEMP 22.1 c  
 SLVNT CDCL3  
 EXREF 0.00 ppm  
 BF 0.12 Hz  
 RGAIN 15

single pulse decoupled gated NOE

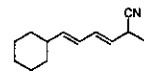

4i

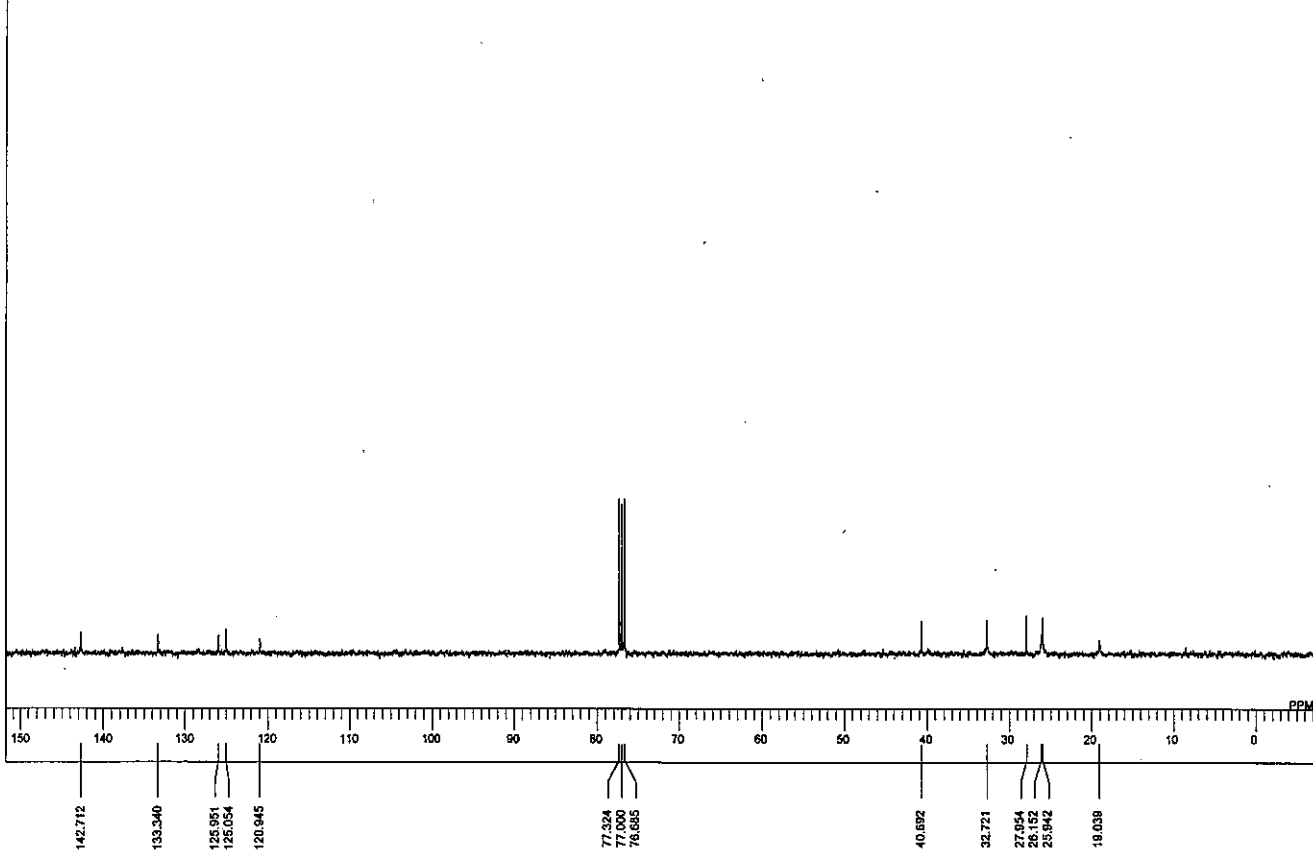

DFILE GSHH\_15\_54\_pure\_2  
 COMNT single\_pulse\_decou  
 DATIM 2014-10-20 17:02:4  
 OBNUC 13C  
 EXMOD carbon.jp  
 OBFRQ 100.63 MHz  
 OBSET 5.35 KHz  
 OBFRQ 5.86 Hz  
 POINT 49960  
 FREQU 39258.79 Hz  
 SCANS 70  
 ACQTM 1.0433 sec  
 PD 2.0000 sec  
 PWI 3.02 usec  
 IRNUC 1H  
 CTEMP 55.0 c  
 SLVNT CDCL3  
 EXREF 77.00 ppm  
 BF 1.00 Hz  
 RGAIN 50

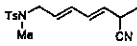

4m

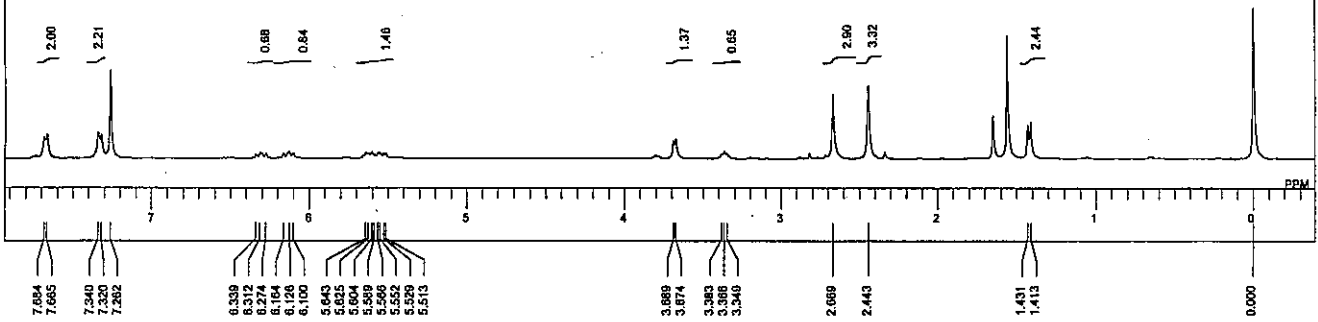

DFILE GSHH\_14\_06\_10.a  
 COMNT 2014-07-10 18:27:2  
 DATIM single\_pulse.exp  
 OBNUC 1H  
 EXMOD 399.78 MHz  
 OBFRQ 4.19 KHz  
 OBSET 7.29 Hz  
 OBFIN 15384  
 POINT 5988.80 Hz  
 FREQU 8  
 SCANS 2.7312 sec  
 ACQTM 2.0000 sec  
 PD 5.75 usec  
 PW1  
 IRNUC 22.7 c  
 CTEMP CDCL3  
 SLVNT 0.00 ppm  
 EXREF 3.00 Hz  
 BF 22  
 RGAIN

single pulse decoupled gated NOE

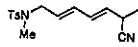

4m

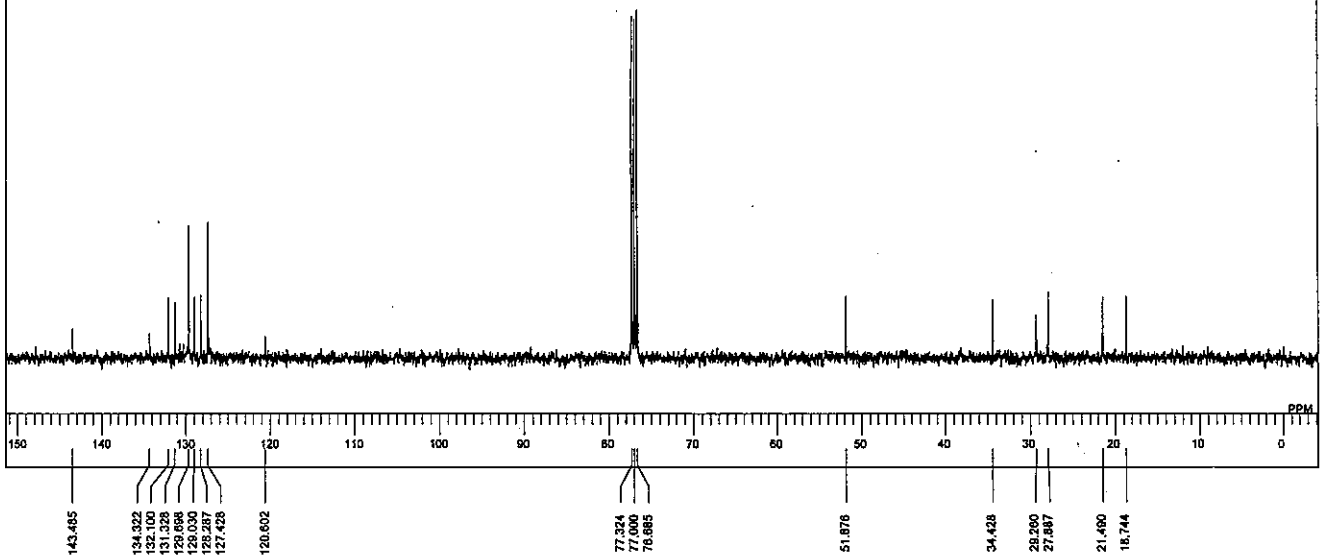

DFILE GSHH\_14\_06\_10.c.c  
 COMNT single\_pulse\_decou  
 DATIM 2014-07-10 20:25:11  
 OBNUC 13C  
 EXMOD carbon\_jcp  
 OBFRQ 100.63 MHz  
 OBSET 5.35 KHz  
 OBFIN 5.88 Hz  
 POINT 40960  
 FREQU 39258.79 Hz  
 SCANS 50  
 ACQTM 1.0433 sec  
 PD 2.0000 sec  
 PW1 3.02 usec  
 IRNUC 1H  
 CTEMP 22.5 c  
 SLVNT CDCL3  
 EXREF 77.00 ppm  
 BF 0.12 Hz  
 RGAIN 50

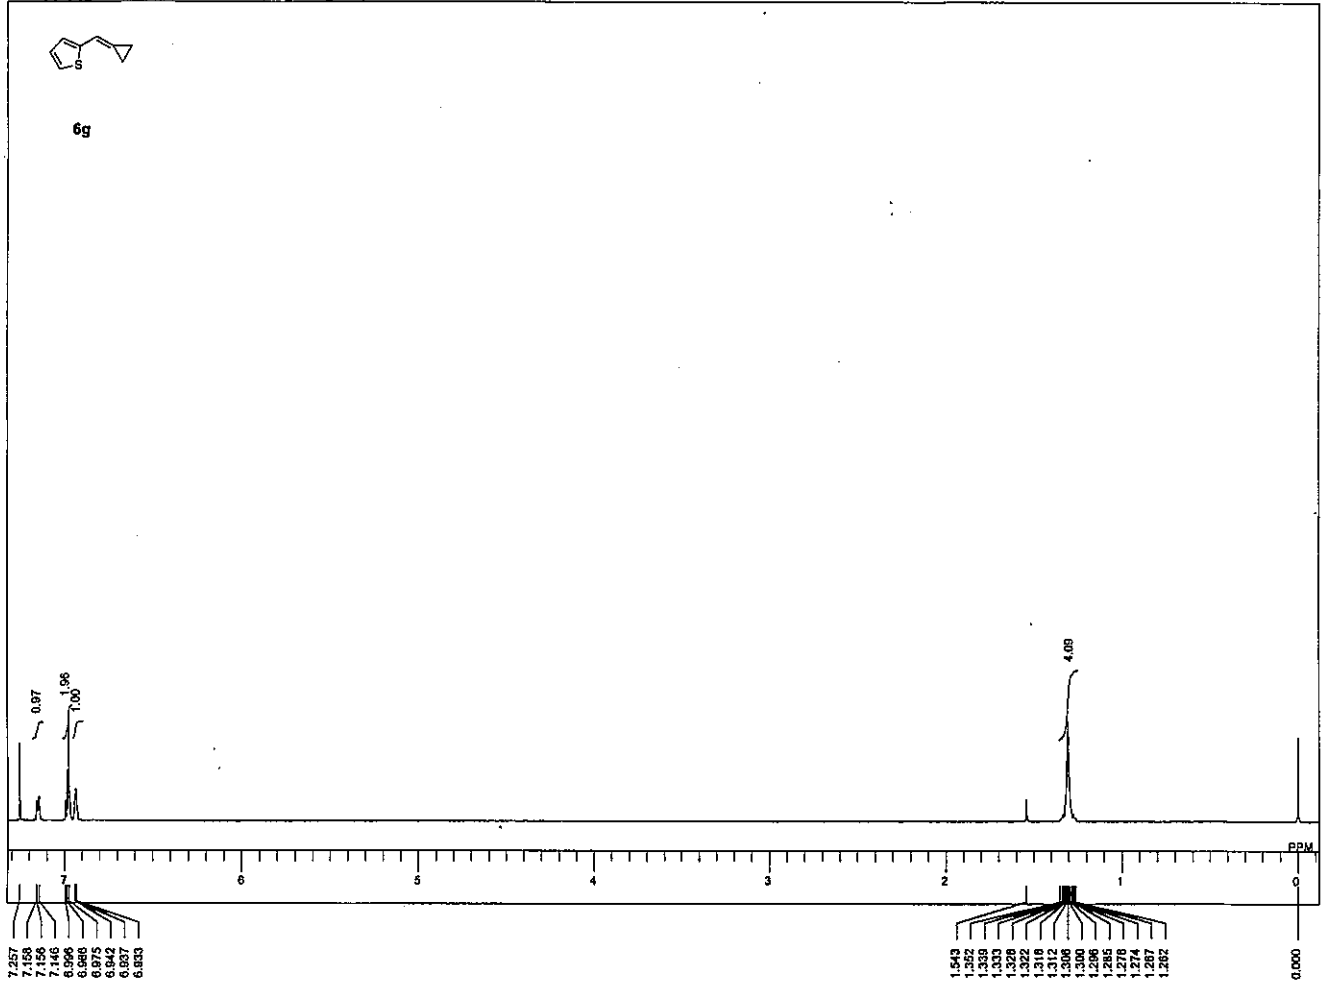

DFILE GSHH 14 70 pure\_f  
COMNT single\_pulse  
DATIM 2014-09-09 20:56:11  
OBNUC 1H  
EXMOD proton.jp  
OBFRQ 399.78 MHz  
OBSET 4.19 KHz  
OBFIN 7.29 Hz  
POINT 20460  
FREQU 8378.75 Hz  
SCANS 1  
ACQTM 2.1837 sec  
PD 5.0000 sec  
PWH 5.01 usec  
IRNUC 1H  
CTEMP 20.8 c  
SLVNT CDCL3  
EXREF 0.00 ppm  
BF 0.12 Hz  
RGAIN 44

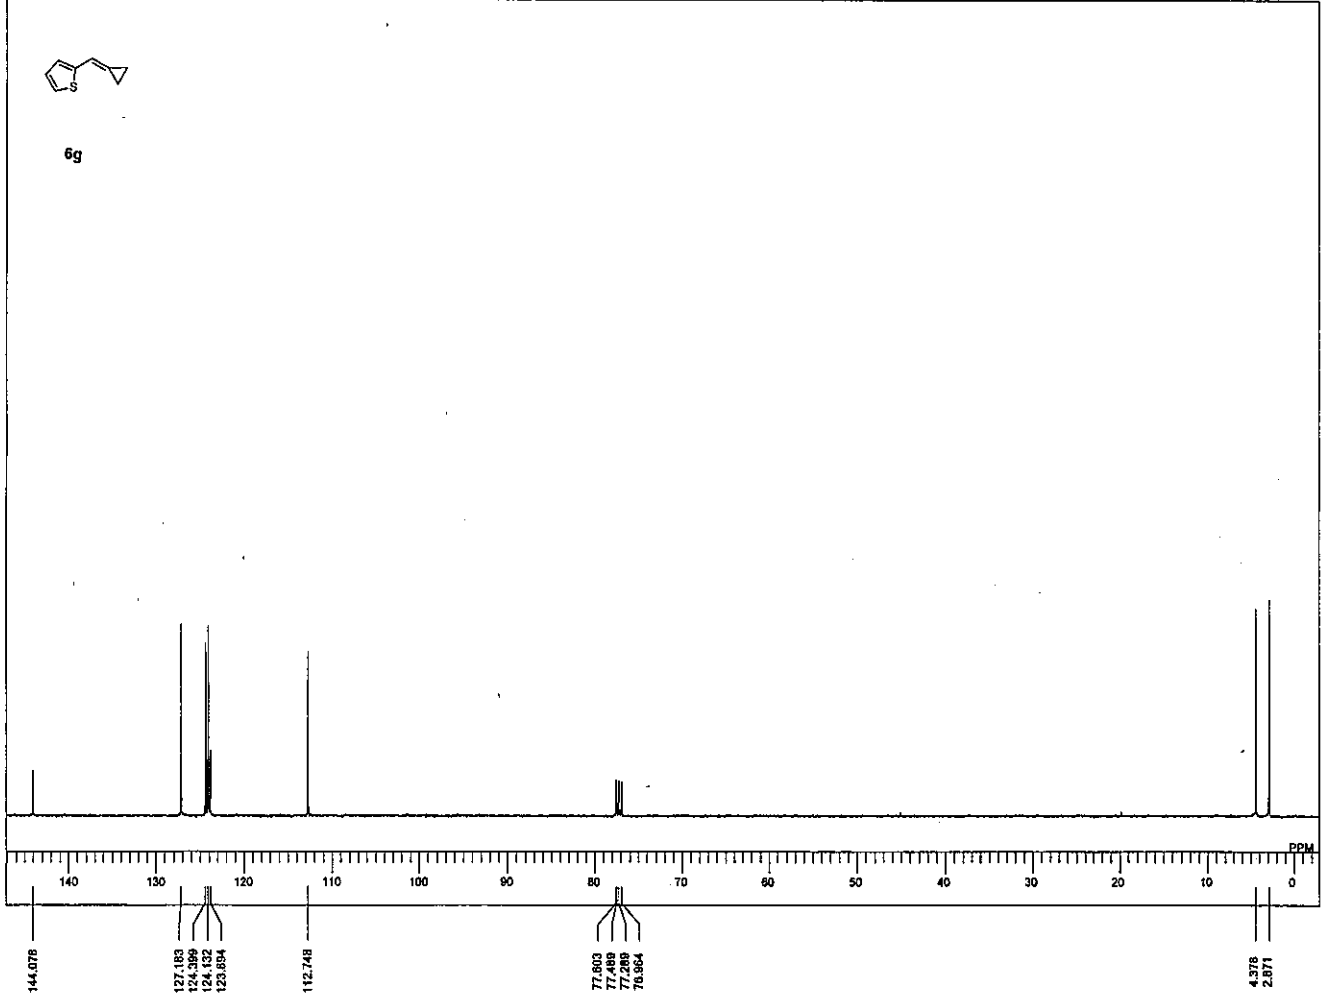

DFILE GSHH 1470h\_Carb  
COMNT single\_pulse\_decoupl  
DATIM 2014-09-09 19:11:31  
OBNUC 13C  
EXMOD carbon.jp  
OBFRQ 100.53 MHz  
OBSET 5.33 KHz  
OBFIN 5.88 Hz  
POINT 40960  
FREQU 39258.79 Hz  
SCANS 30  
ACQTM 1.0433 sec  
PD 2.0000 sec  
PWH 3.02 usec  
IRNUC 1H  
CTEMP 20.9 c  
SLVNT CDCL3  
EXREF 224.97 ppm  
BF 0.12 Hz  
RGAIN 50

single\_pulse  
D:\CEA\1\1H\1\_f\_1bon1511501-1520\GSHH ibu pure\_Proton\_f1-1.jcf

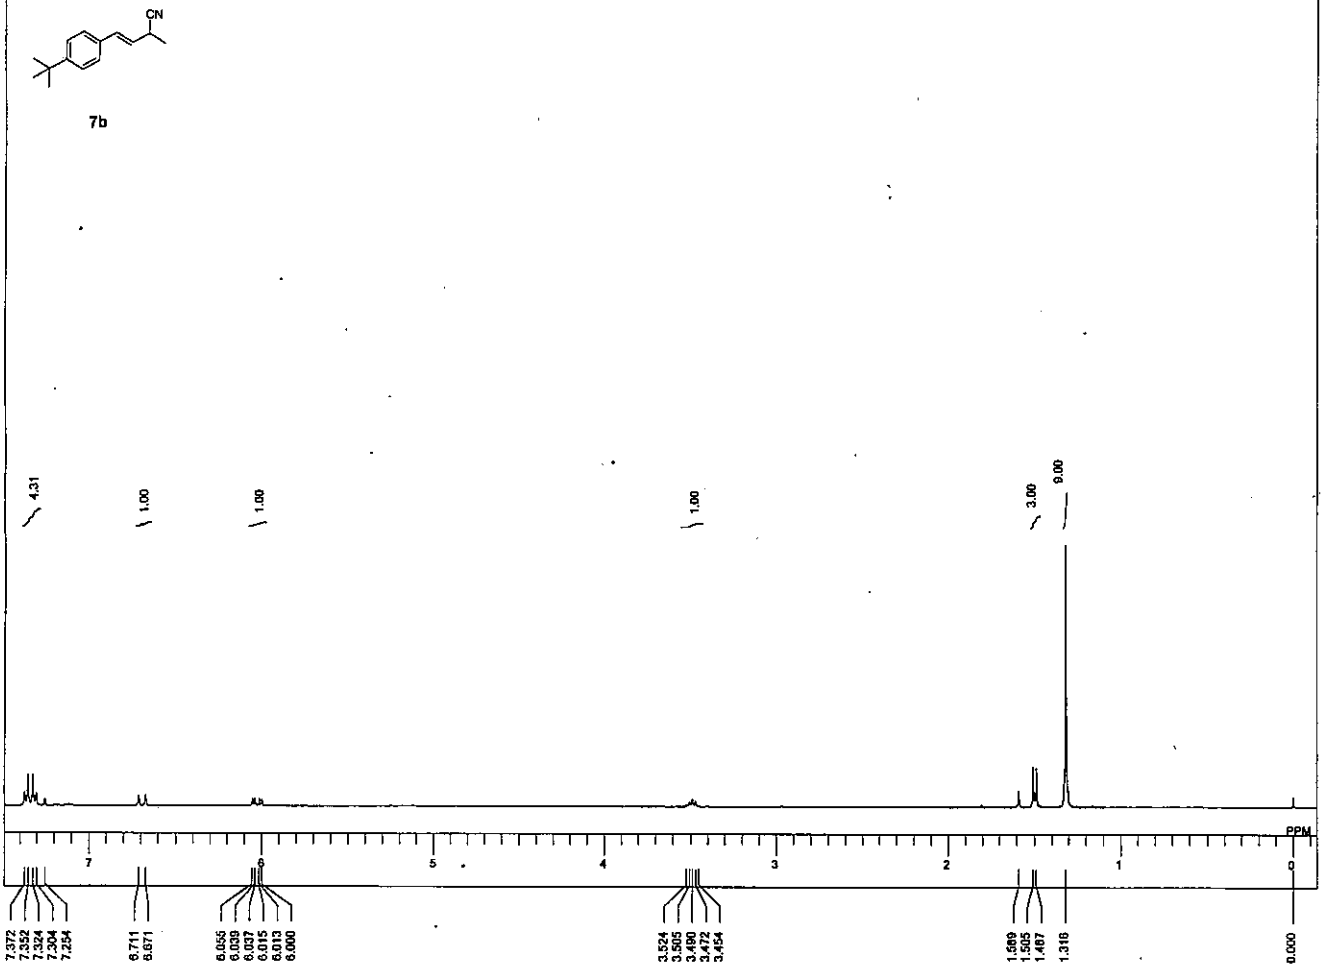

DFILE GSHH ibu pure\_Prc  
COMNT single\_pulse  
DATIM 2014-09-13 14:50:31  
OBNUC 1H  
EXMOD proton.jcp  
OBFRQ 398.78 MHz  
OBSET 4.19 KHz  
OBFIN 7.29 Hz  
POINT 20450  
FREOU 9378.75 Hz  
SCANS 8  
ACQTM 2.1837 sec  
PD 5.0000 sec  
PWI 5.01 usec  
IRNUC 1H  
CTEMP 20.8 c  
SLVNT CDCL3  
EXREF 0.00 ppm  
BF 1.00 Hz  
RGAIN 48

single pulse decoupled gated NMR  
D:\CEA\1\1H\1\_f\_1bon1511501-1520\GSHH ibu pure\_Carbon\_f1-1.jcf

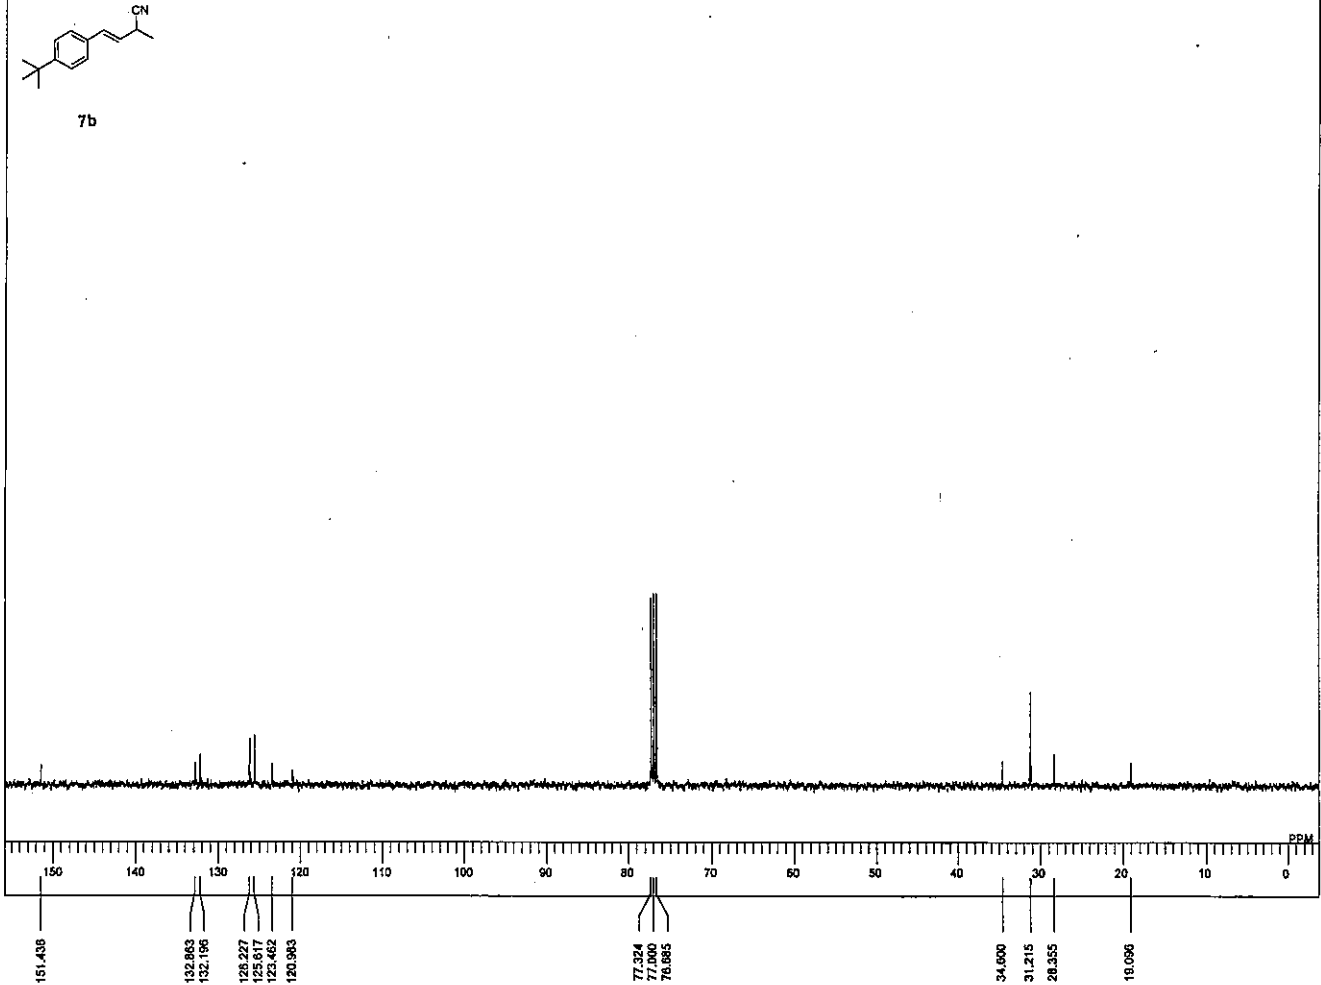

DFILE GSHH ibu pure\_Ca  
COMNT single\_pulse decou  
DATIM 2014-09-13 14:52:0  
OBNUC 13C  
EXMOD carbon.jcp  
OBFRQ 100.53 MHz  
OBSET 5.35 KHz  
OBFIN 5.85 Hz  
POINT 40960  
FREOU 39258.79 Hz  
SCANS 50  
ACQTM 1.0433 sec  
PD 2.0000 sec  
PWI 3.02 usec  
IRNUC 1H  
CTEMP 20.9 c  
SLVNT CDCL3  
EXREF 77.00 ppm  
BF 1.00 Hz  
RGAIN 50

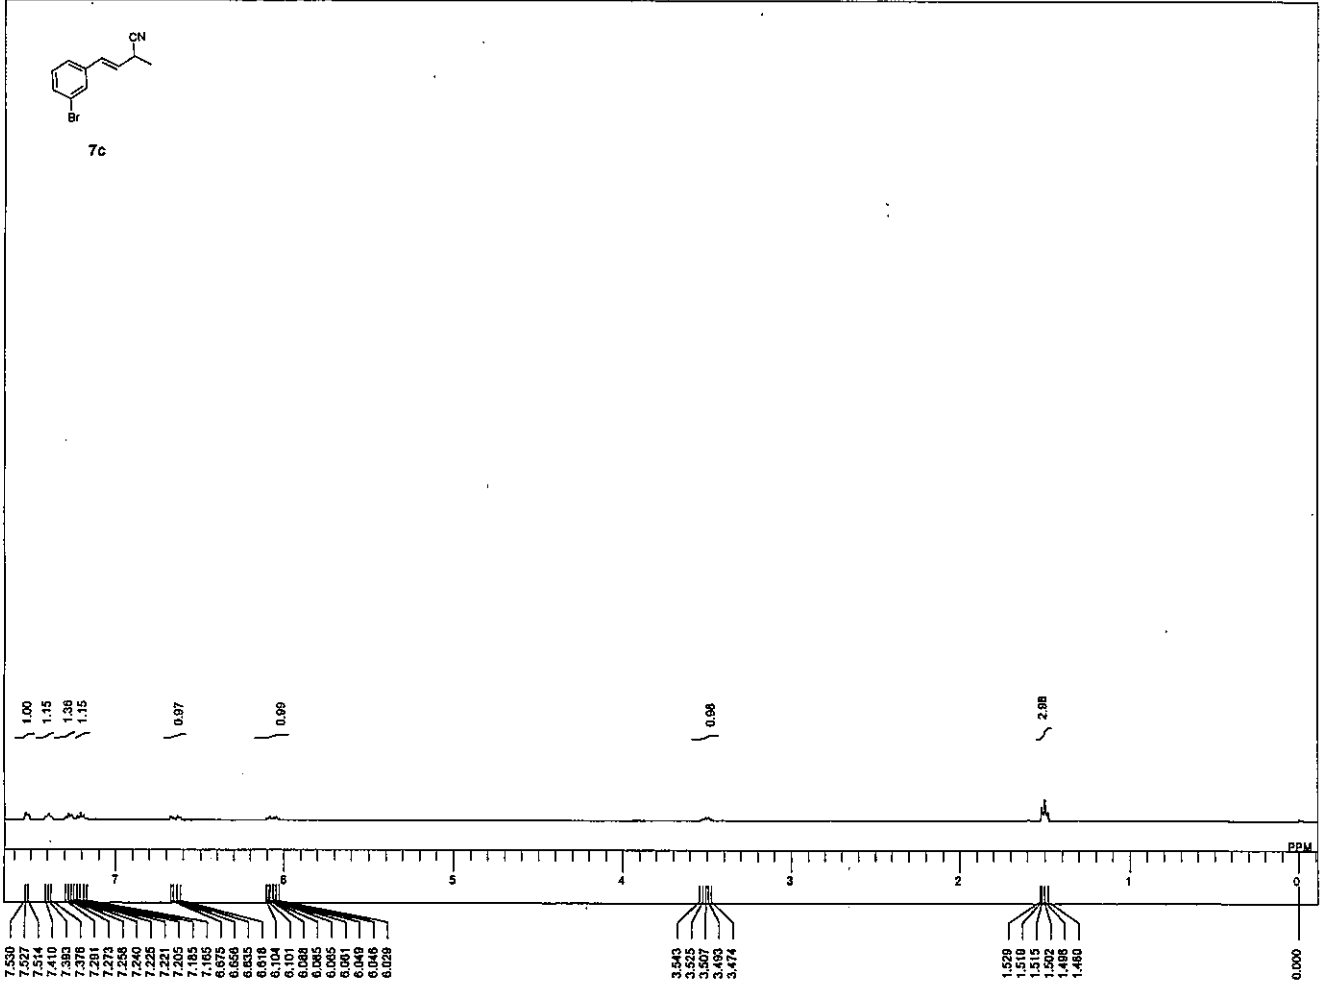

DFILE GSHH 15 19\_Proto  
 COMNT single\_pulse  
 DATIM 2014-09-29 16:05:4  
 OBNUC 1H  
 EXMOD proton\_jpp  
 OBFRQ 399.76 MHz  
 OBSET 4.19 KHz  
 OBFIN 7.29 Hz  
 POINT 16384  
 FREQU 7503.00 Hz  
 SCANS 1  
 ACQTM 2.1837 sec  
 PD 5.0000 sec  
 PW1 5.01 usec  
 IRNUC 1H  
 CTEMP 20.5 c  
 SLVNT CDCL3  
 EXREF 0.00 ppm  
 BF 1.00 Hz  
 RGAIN 38

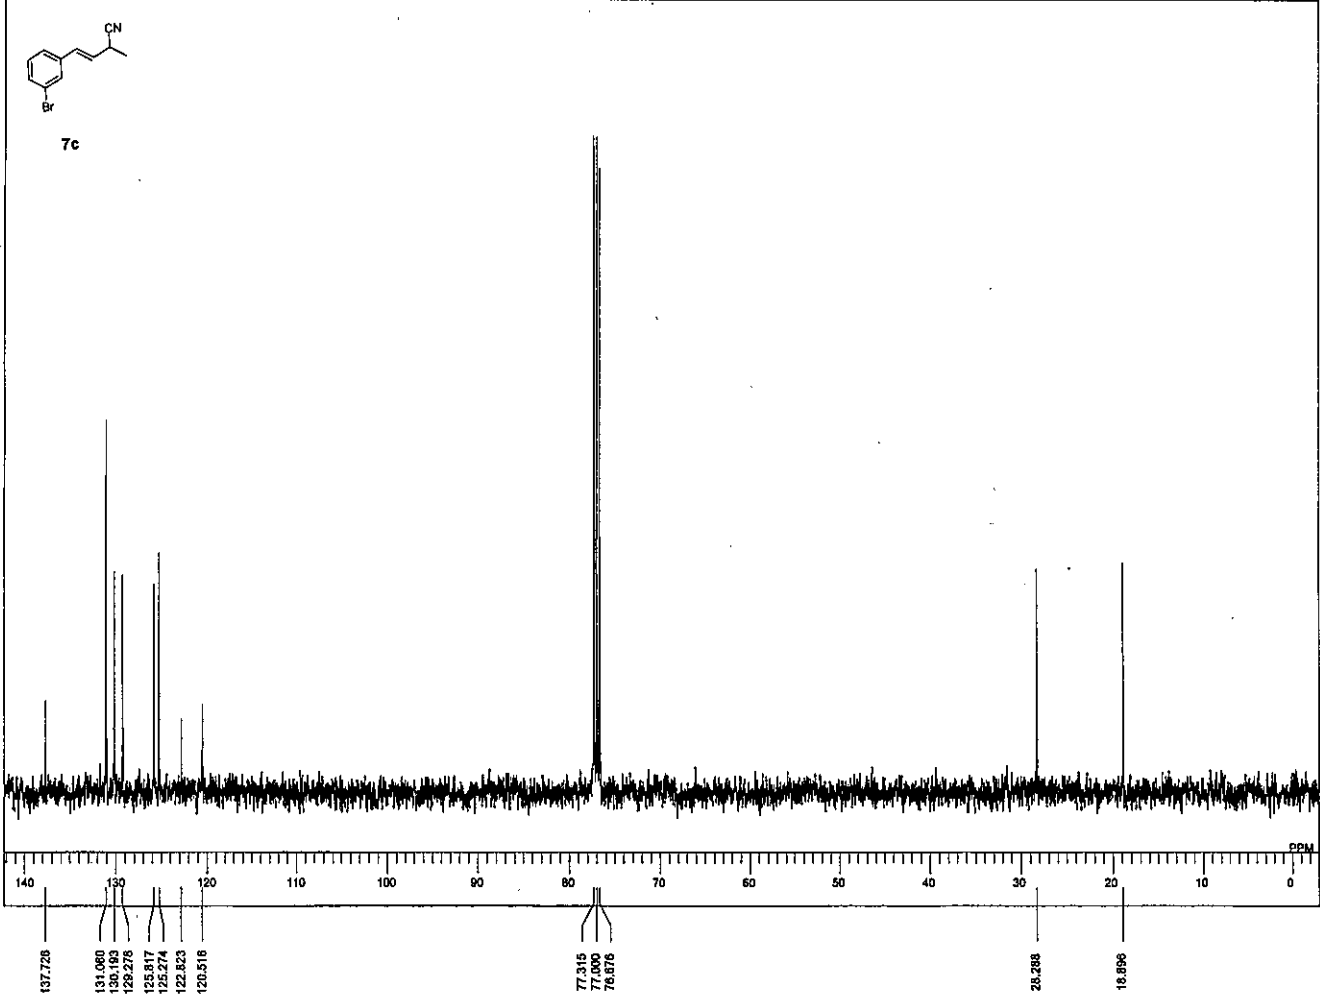

DFILE GSHH 15 19\_Carbo  
 COMNT single\_pulse\_decou  
 DATIM 2014-09-29 16:02:5  
 OBNUC 13C  
 EXMOD carbon\_jpp  
 OBFRQ 100.53 MHz  
 OBSET 5.35 KHz  
 OBFIN 5.66 Hz  
 POINT 40960  
 FREQU 39258.79 Hz  
 SCANS 30  
 ACQTM 1.0433 sec  
 PD 2.0000 sec  
 PW1 3.02 usec  
 IRNUC 1H  
 CTEMP 20.6 c  
 SLVNT CDCL3  
 EXREF 77.00 ppm  
 BF 1.00 Hz  
 RGAIN 50

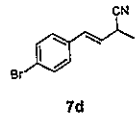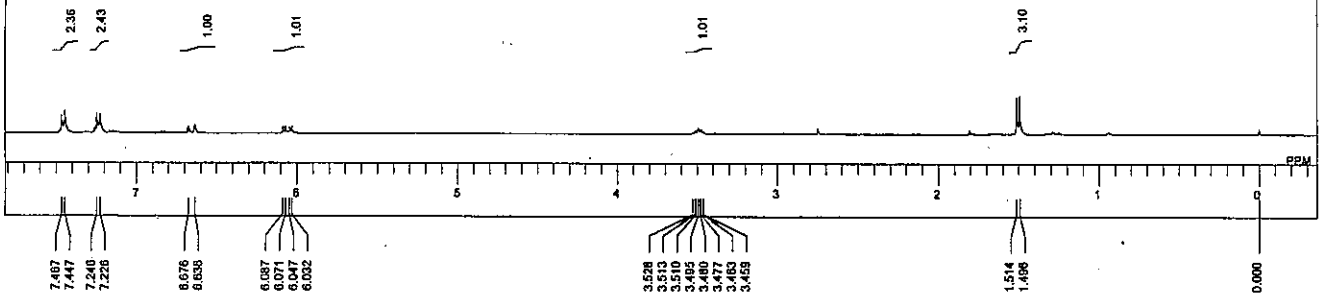

DFILE GSHH 15 02 tm\_Pr  
COMNT single\_pulse  
DATIM 2014-09-12 17:08:1  
OBNUC 1H  
EXMOD proton.jpg  
OBFRQ 399.78 MHz  
OBSET 4.19 KHz  
OBFIN 7.29 Hz  
POINT 20490  
FREQU 9378.75 Hz  
SCANS 1  
ACQTM 2.1837 sec  
PD 5.0000 sec  
PWI 5.01 usec  
IRNUC 1H  
CTEMP 20.7 c  
SLVNT CDCL3  
EXREF 0.00 ppm  
BF 0.12 Hz  
RGAIN 36

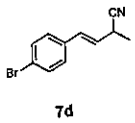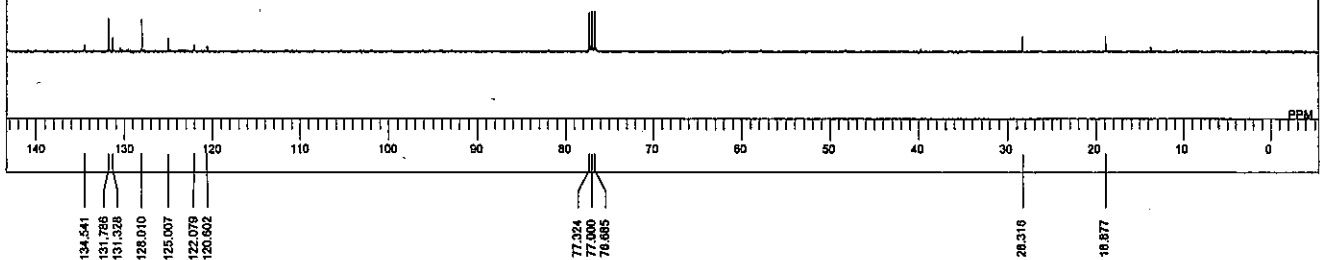

DFILE GSHH 15 02 tm\_Cr  
COMNT single\_pulse decou  
DATIM 2014-09-12 17:08:4  
OBNUC 13C  
EXMOD carbon.jpg  
OBFRQ 100.53 MHz  
OBSET 5.35 KHz  
OBFIN 5.88 Hz  
POINT 40950  
FREQU 39258.79 Hz  
SCANS 30  
ACQTM 1.0433 sec  
PD 2.0000 sec  
PWI 3.02 usec  
IRNUC 1H  
CTEMP 20.9 c  
SLVNT CDCL3  
EXREF 77.00 ppm  
BF 0.12 Hz  
RGAIN 50

single\_pulse  
D:\CEA\j\H\j\j\horh14\1451-1480\GSHH 14.65 Proton ft-1-1.als

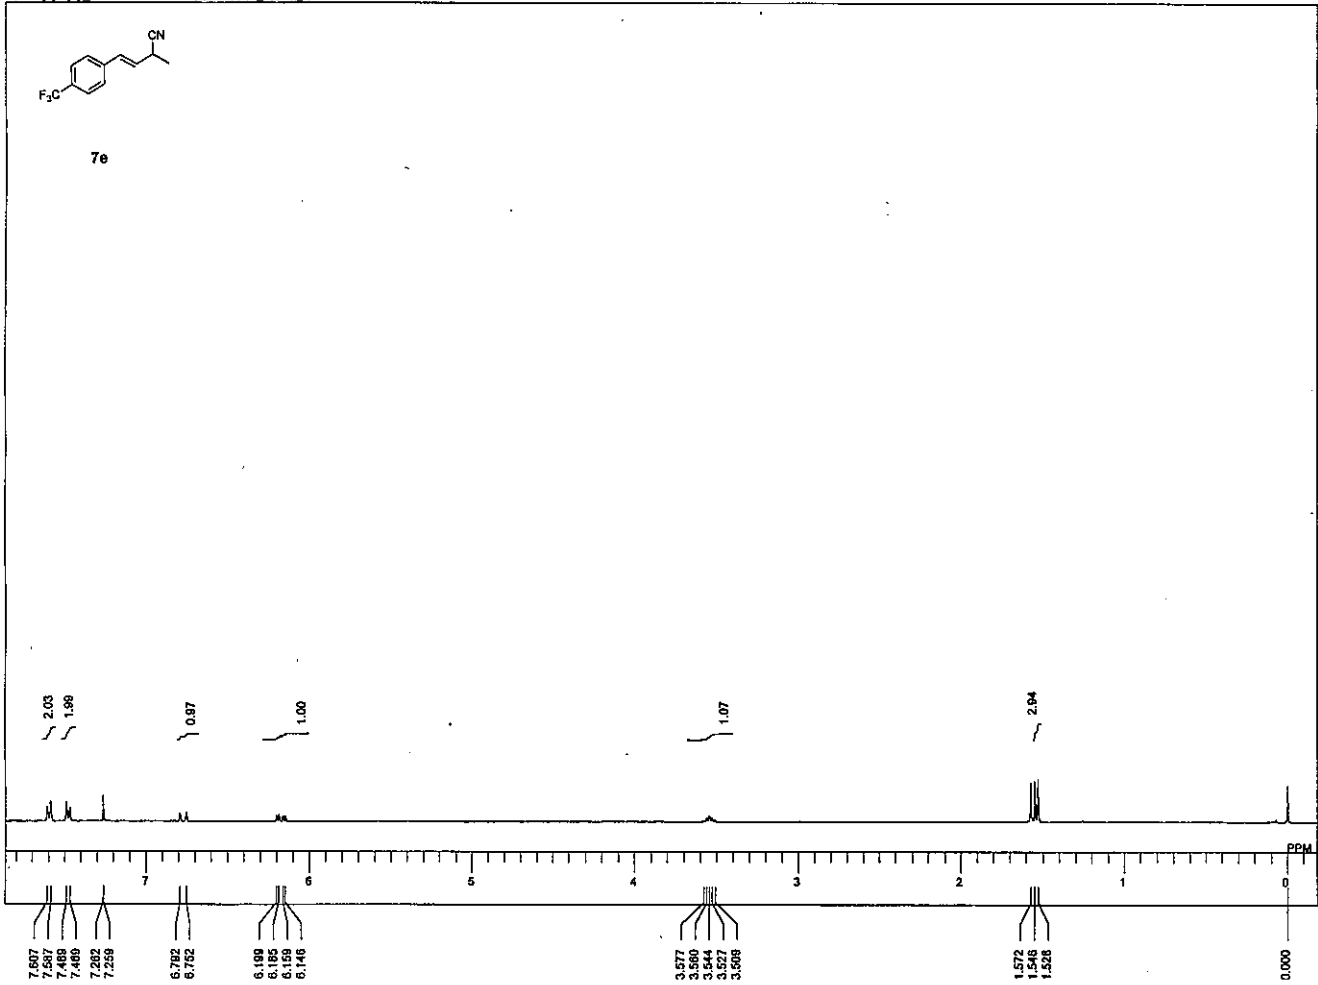

D:\CEA\j\H\j\j\horh14\1451-1480\GSHH 14.65 Proton ft-1-1.als

|       |                    |
|-------|--------------------|
| DFILE | GSHH 14.65_Proton  |
| COMNT | single_pulse       |
| DATIM | 2014-09-08 14:45:2 |
| OBNUC | 1H                 |
| EXMOD | proton.jcp         |
| OBFRQ | 399.78 MHz         |
| OBSET | 4.19 KHz           |
| OBFIN | 7.29 Hz            |
| POINT | 16394              |
| FREQU | 7503.00 Hz         |
| SCANS | 8                  |
| ACQTM | 2.1837 sec         |
| PD    | 5.0000 sec         |
| PW1   | 5.01 usec          |
| IRNUC | 1H                 |
| CTEMP | 21.4 c             |
| SLVNT | CDCL3              |
| EXREF | 0.00 ppm           |
| BF    | 1.00 Hz            |
| RGAIN | 48                 |

single\_pulse decoupled gated NOE  
D:\CEA\j\H\j\j\horh14\1451-1480\GSHH 14.65c Carbon ft-1-1.kf

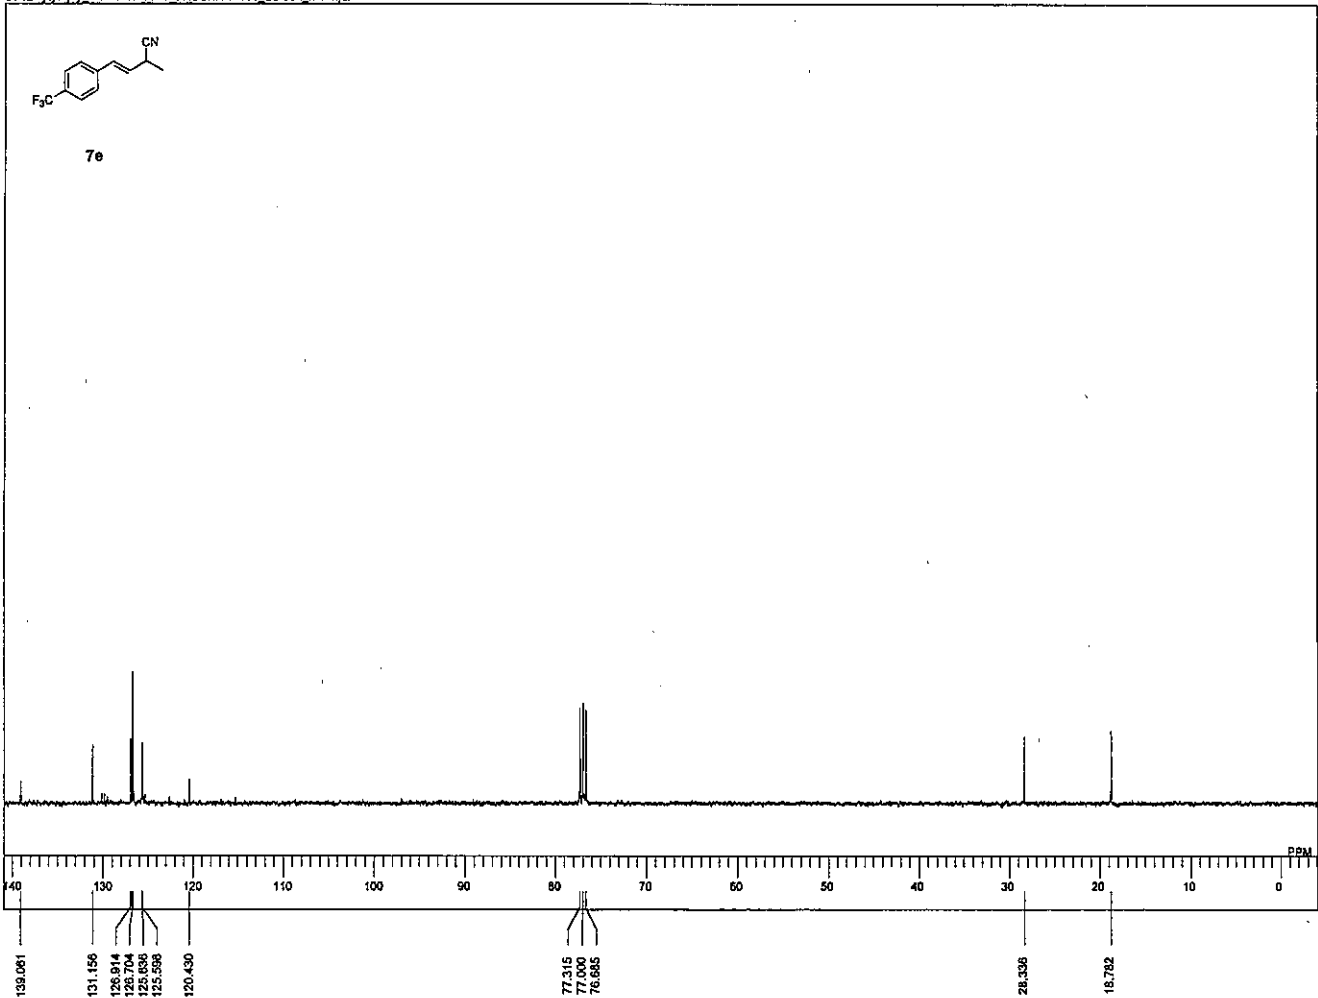

D:\CEA\j\H\j\j\horh14\1451-1480\GSHH 14.65c Carbon ft-1-1.kf

|       |                    |
|-------|--------------------|
| DFILE | GSHH 14.65c_Carb   |
| COMNT | single_pulse decou |
| DATIM | 2014-09-09 19:14:5 |
| OBNUC | 13C                |
| EXMOD | carbon.jcp         |
| OBFRQ | 100.63 MHz         |
| OBSET | 5.35 KHz           |
| OBFIN | 5.86 Hz            |
| POINT | 40960              |
| FREQU | 39258.79 Hz        |
| SCANS | 30                 |
| ACQTM | 1.9433 sec         |
| PD    | 2.0000 sec         |
| PW1   | 3.02 usec          |
| IRNUC | 1H                 |
| CTEMP | 20.9 c             |
| SLVNT | CDCL3              |
| EXREF | 77.00 ppm          |
| BF    | 0.12 Hz            |
| RGAIN | 50                 |

single\_pulse  
D:\CE\j\H\j\Uhor\1411461-1480\GSHH 14 75 tm pure\_Proton ft-1-1.jdf

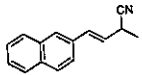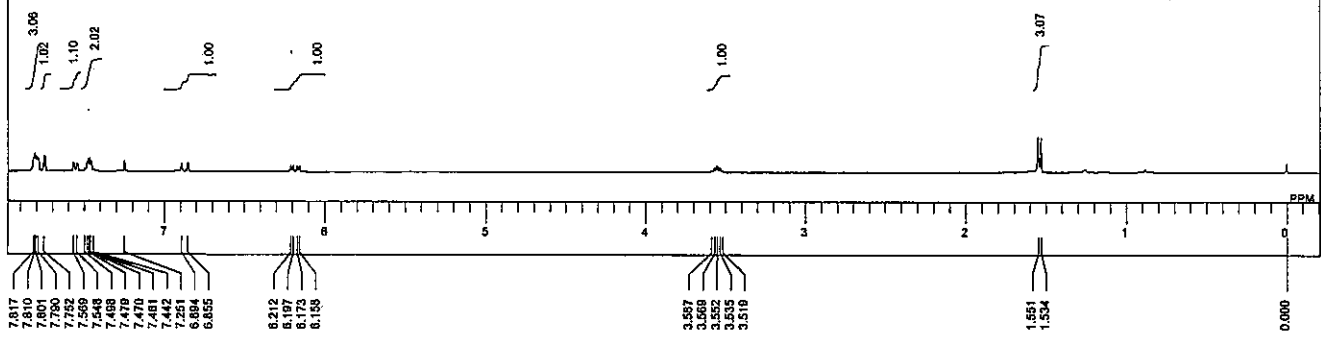

7.817  
7.810  
7.800  
7.790  
7.780  
7.752  
7.569  
7.548  
7.498  
7.479  
7.470  
7.461  
7.442  
7.251  
6.894  
6.855

3.537  
3.568  
3.552  
3.535  
3.519

1.651  
1.534

0.000

DFILE GSHH 14 75 tm pur  
COMNT single\_pulse  
DATIM 2014-09-11 11:22:5  
OBNUC 1H  
EXMOD proton.jp  
OBFRQ 399.78 MHz  
OBSET 4.19 KHz  
OBFIN 7.23 Hz  
POINT 20480  
FREOU 9378.75 Hz  
SCANS 8  
ACQTM 2.1837 sec  
PD 5.0000 sec  
PWI 5.01 usec  
IRNUC 1H  
CTEMP 20.7 c  
SLVNT CDCL3  
EXREF 0.00 ppm  
BF 0.12 Hz  
RGAIN 40

single pulse decoupled gated NOE  
D:\CE\j\H\j\Uhor\1411461-1480\GSHH 14 75 tm pure\_Carbon ft-1-1.jdf

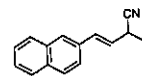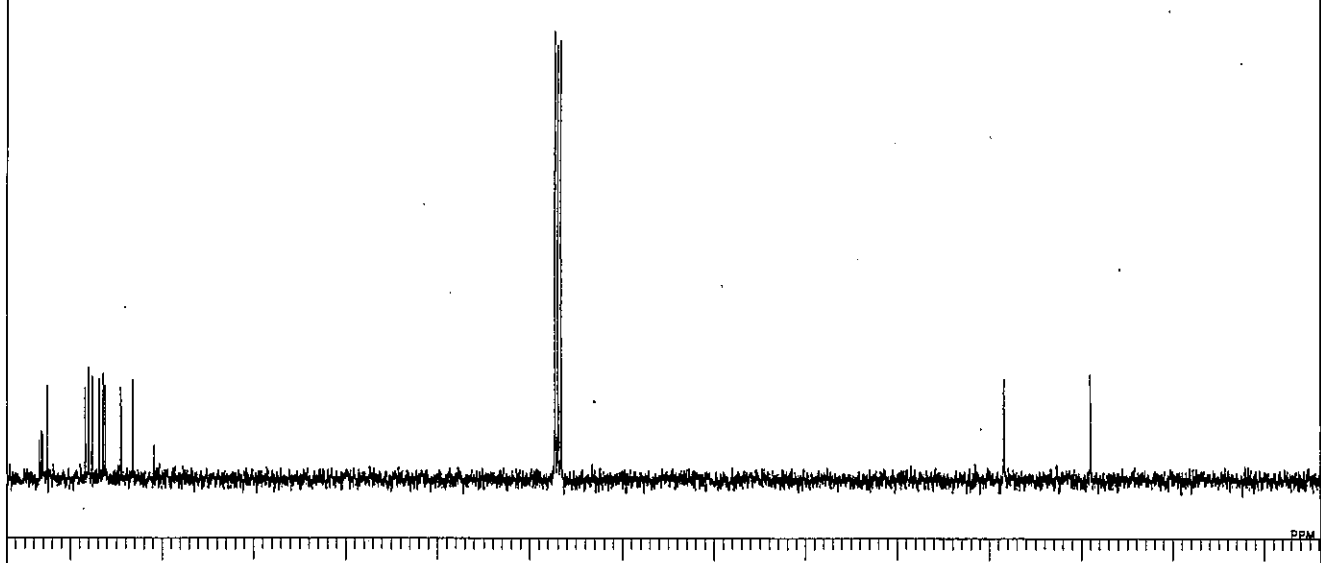

132.416  
132.316  
132.047  
128.577  
128.391  
128.039  
127.857  
126.875  
126.437  
126.227  
126.225  
123.265  
120.878

77.315  
77.000  
76.676

28.450

19.068

DFILE GSHH 14 75 tm pur  
COMNT single\_pulse decou  
DATIM 2014-09-11 11:24:2  
OBNUC 13C  
EXMOD carbon.jp  
OBFRQ 100.53 MHz  
OBSET 5.35 KHz  
OBFIN 5.85 Hz  
POINT 40960  
FREOU 39258.79 Hz  
SCANS 40  
ACQTM 1.0433 sec  
PD 2.0000 sec  
PWI 3.02 usec  
IRNUC 1H  
CTEMP 20.9 c  
SLVNT CDCL3  
EXREF 77.00 ppm  
BF 0.12 Hz  
RGAIN 50



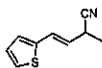

7g

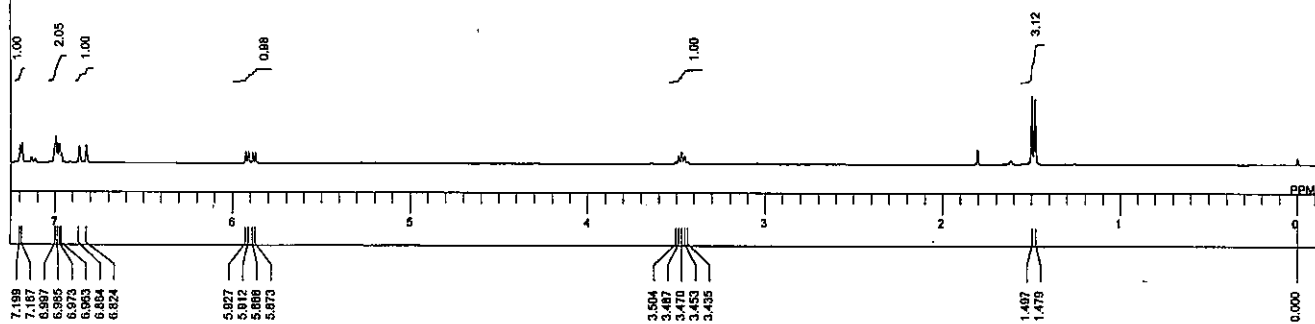

DFILE GSHH 14.76 tm pur  
 COMNT single\_pulse  
 DATIM 2014-09-11 11:15:4  
 OBNUC 1H  
 EXMOD proton.jsp  
 OBFRQ 399.78 MHz  
 OBSET 4.19 KHz  
 OBFIN 7.28 Hz  
 POINT 20480  
 FRECU 9378.75 Hz  
 SCANS 8  
 ACQTM 2.1837 sec  
 PD 5.0000 sec  
 PW1 5.01 usec  
 IRNUC 1H  
 CTEMP 20.7 c  
 SLVNT CDCL3  
 EXREF 0.00 ppm  
 BF 0.12 Hz  
 RGAIN 36

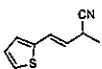

7g

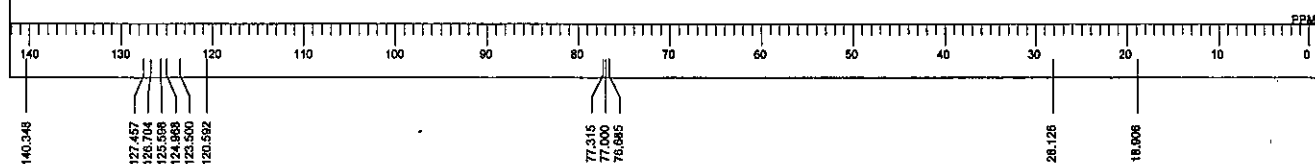

DFILE GSHH 14.76 tm pur  
 COMNT single\_pulse decou  
 DATIM 2014-09-11 11:17:1  
 OBNUC 13C  
 EXMOD carbon.jsp  
 OBFRQ 100.53 MHz  
 OBSET 5.35 KHz  
 OBFIN 5.86 Hz  
 POINT 40960  
 FRECU 39258.79 Hz  
 SCANS 40  
 ACQTM 1.0433 sec  
 PD 2.0000 sec  
 PW1 3.02 usec  
 IRNUC 1H  
 CTEMP 20.9 c  
 SLVNT CDCL3  
 EXREF 77.00 ppm  
 BF 0.12 Hz  
 RGAIN 50

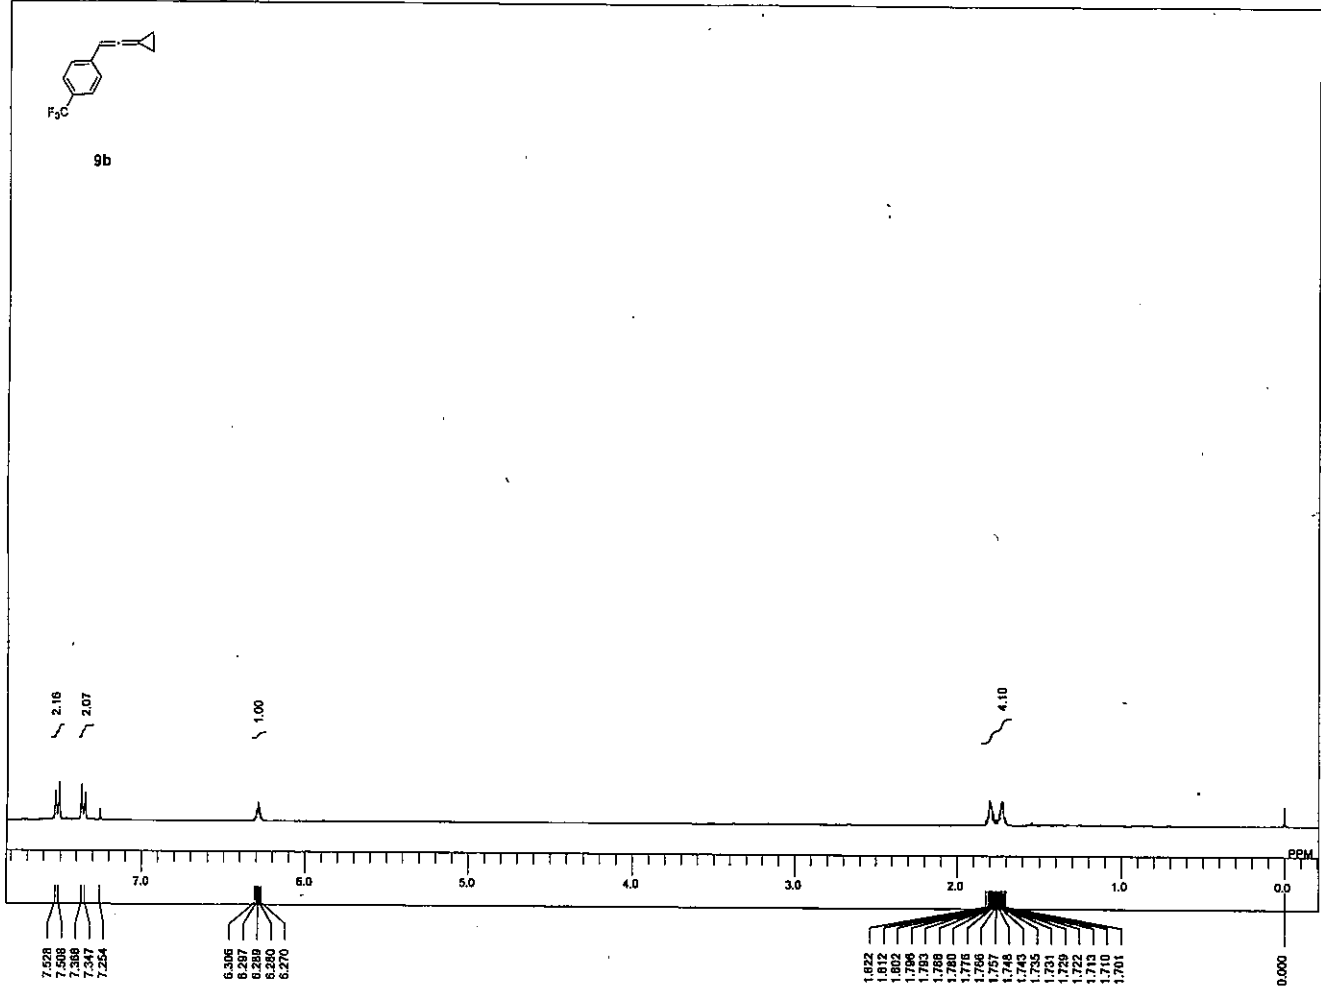

|        |                     |
|--------|---------------------|
| DFILE  | GSHH 8_Protoln_8    |
| COMINT | single_pulse        |
| DATIM  | 2015-01-26 10:20:33 |
| ORNUC  | 1H                  |
| EXMOD  | protoln.jpj         |
| OBFRQ  | 399.78 MHz          |
| OBSET  | 4.19 KHz            |
| OBFIN  | 7.29 Hz             |
| POINT  | 20450               |
| FREQU  | 9378.75 Hz          |
| SCANS  | 1                   |
| ACQTM  | 2.1837 sec          |
| PD     | 5.0000 sec          |
| PWI    | 5.01 usec           |
| IRNUC  | 1H                  |
| CTEMP  | 18.4 c              |
| SLVNT  | CDCL3               |
| EXREF  | 0.00 ppm            |
| BF     | 0.12 Hz             |
| RGAIN  | 38                  |

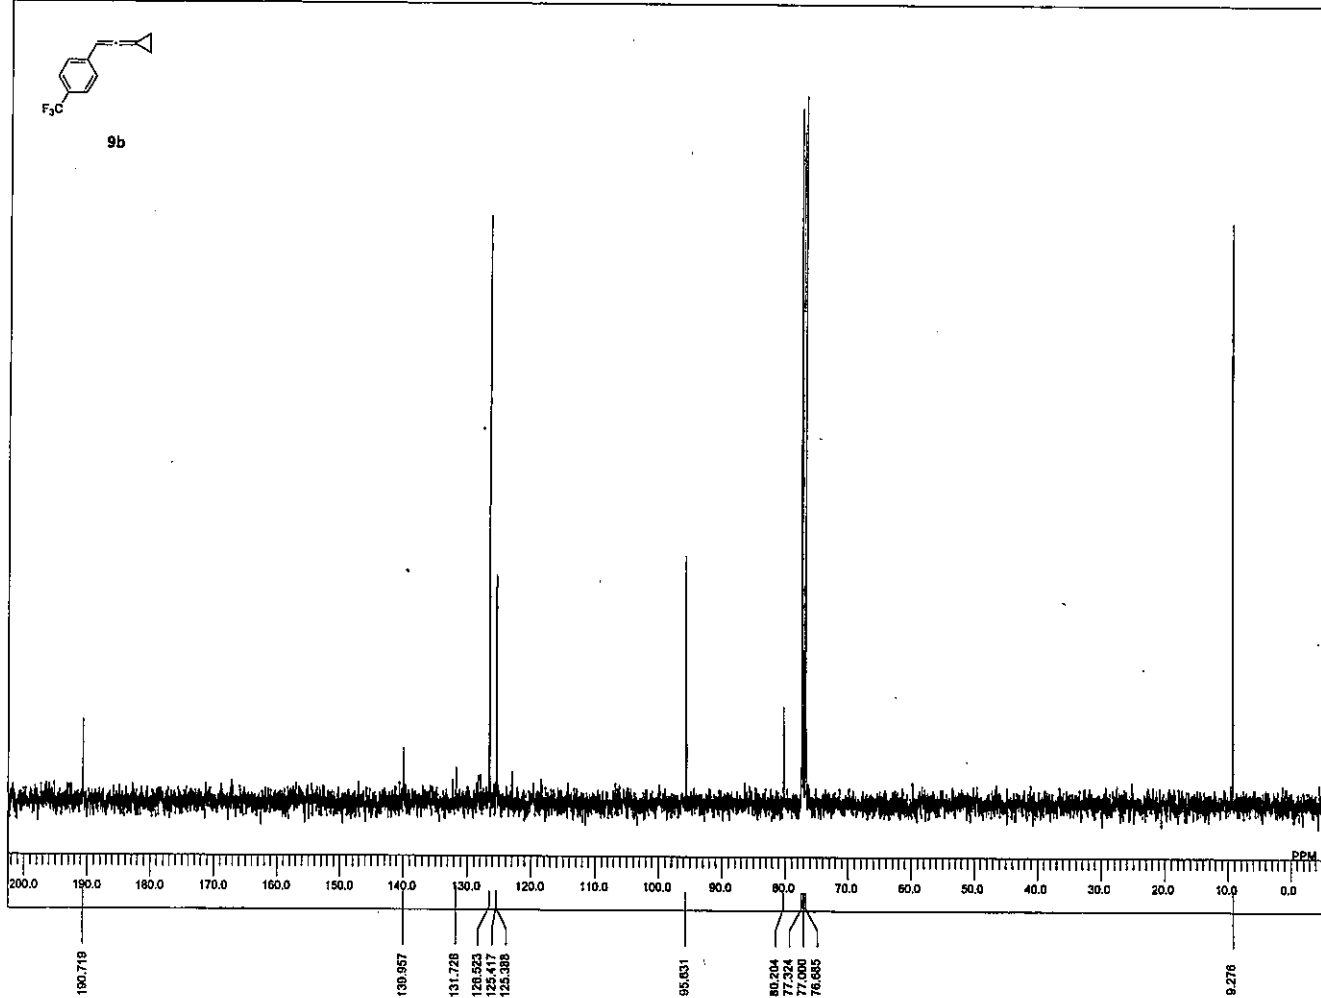

|        |                     |
|--------|---------------------|
| DFILE  | GSHH 8_Carbon_8     |
| COMINT | single_pulse decou  |
| DATIM  | 2015-01-26 10:21:00 |
| ORNUC  | 13C                 |
| EXMOD  | carbon.jpj          |
| OBFRQ  | 100.53 MHz          |
| OBSET  | 5.35 KHz            |
| OBFIN  | 5.88 Hz             |
| POINT  | 40950               |
| FREQU  | 39258.79 Hz         |
| SCANS  | 30                  |
| ACQTM  | 1.0433 sec          |
| PD     | 2.0000 sec          |
| PWI    | 3.02 usec           |
| IRNUC  | 1H                  |
| CTEMP  | 18.7 c              |
| SLVNT  | CDCL3               |
| EXREF  | 77.00 ppm           |
| BF     | 0.12 Hz             |
| RGAIN  | 50                  |

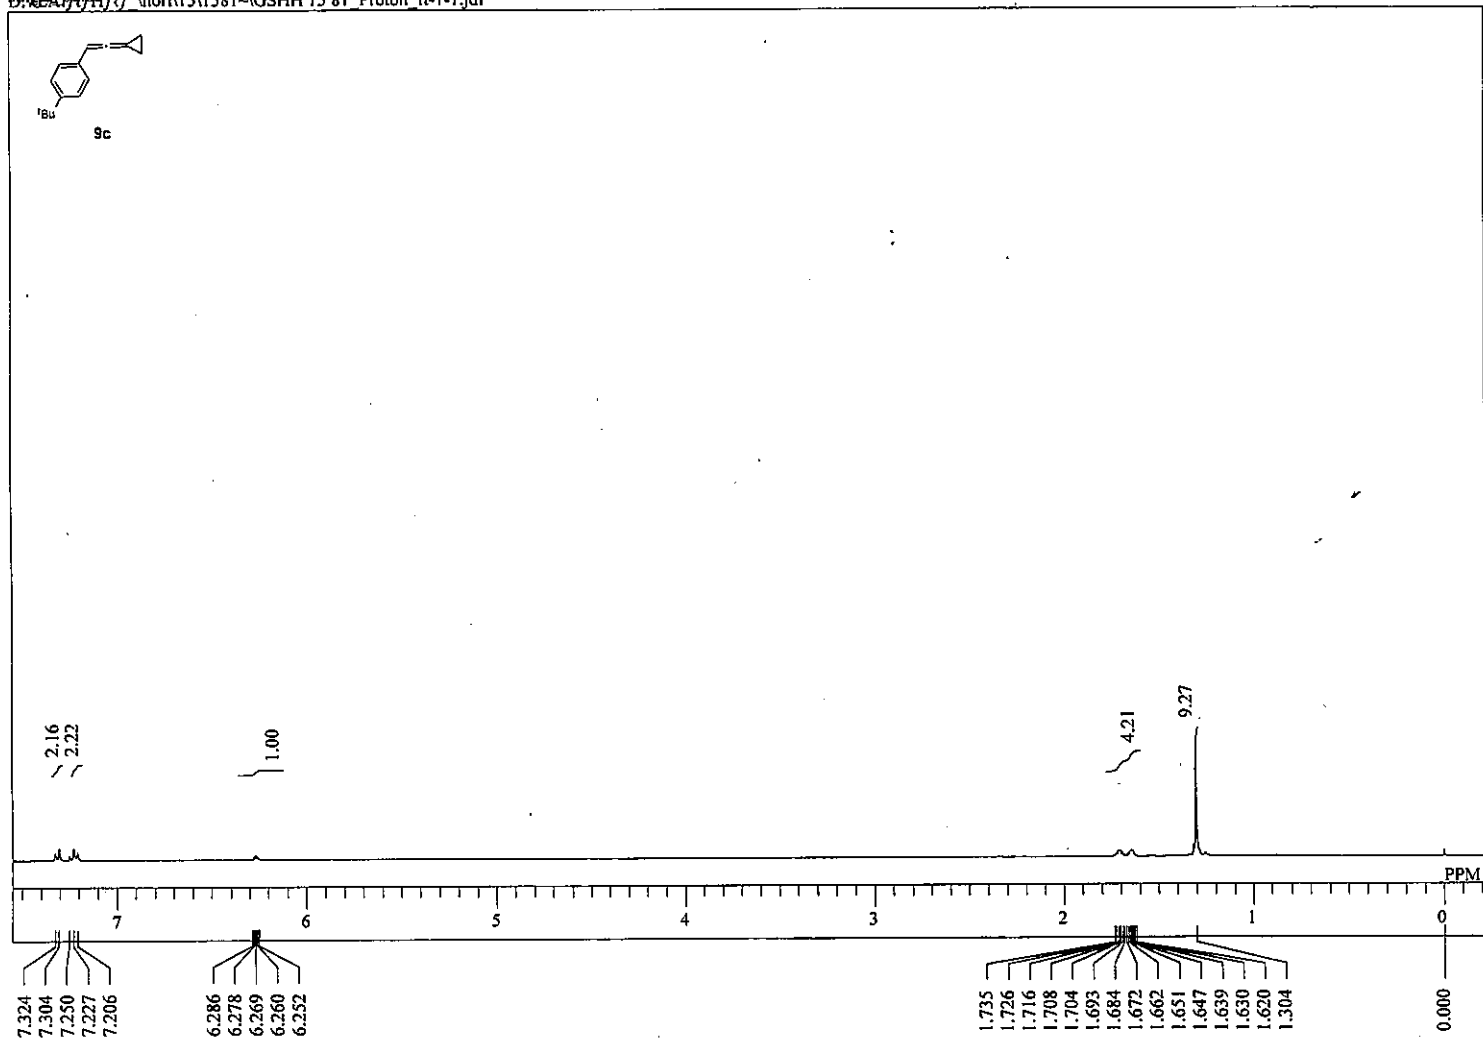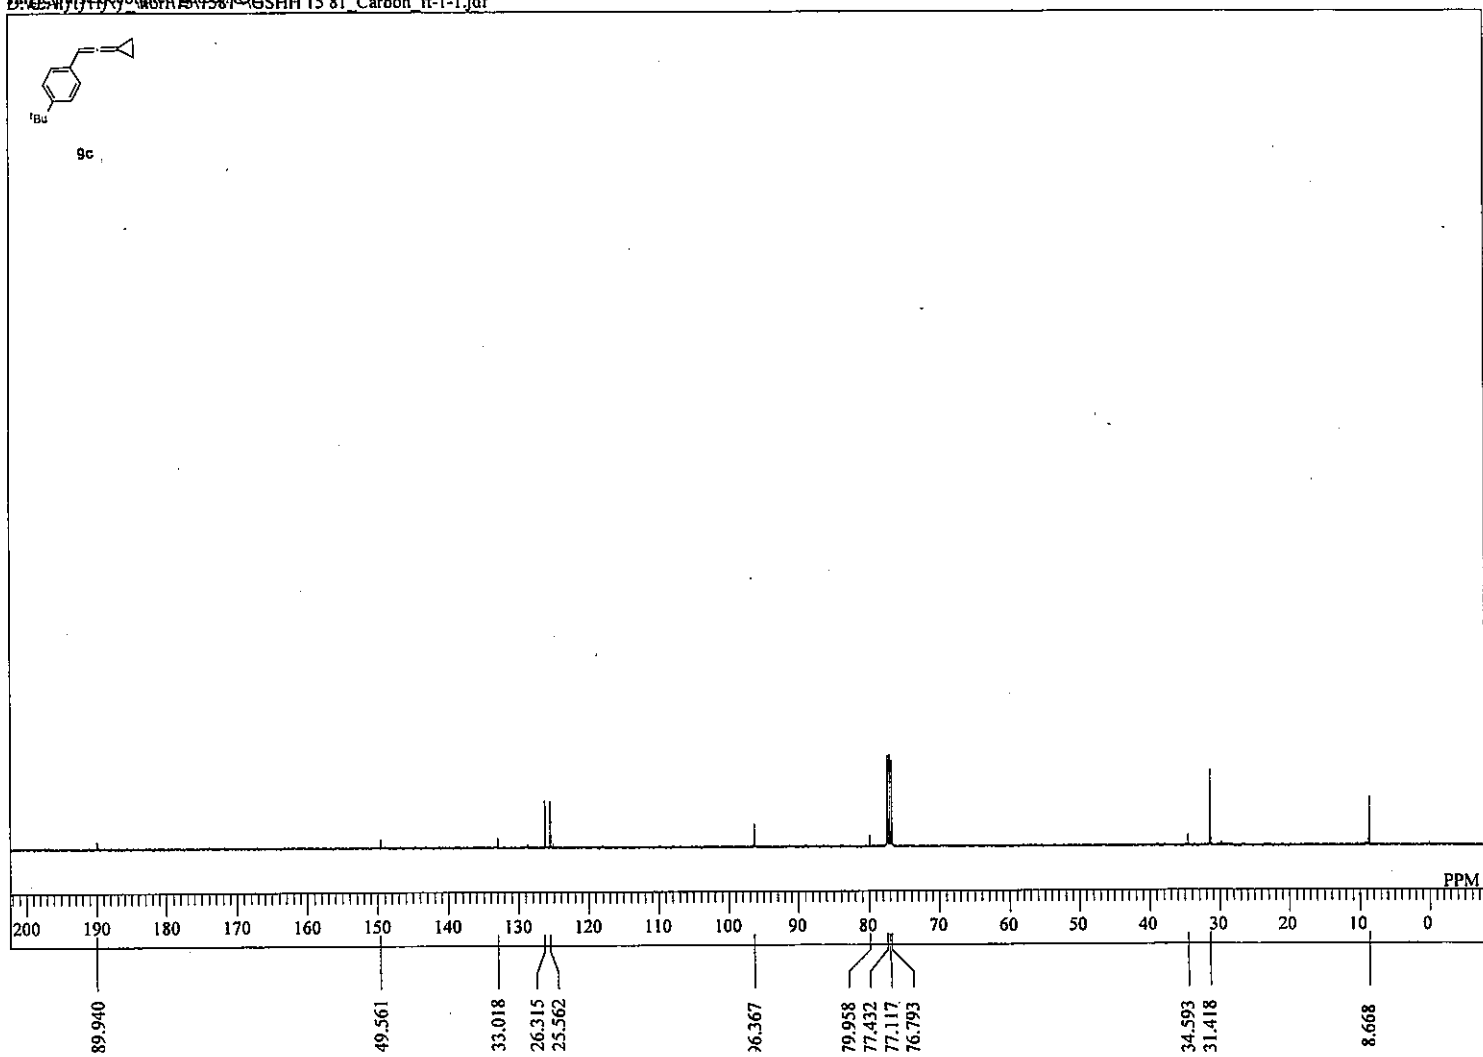

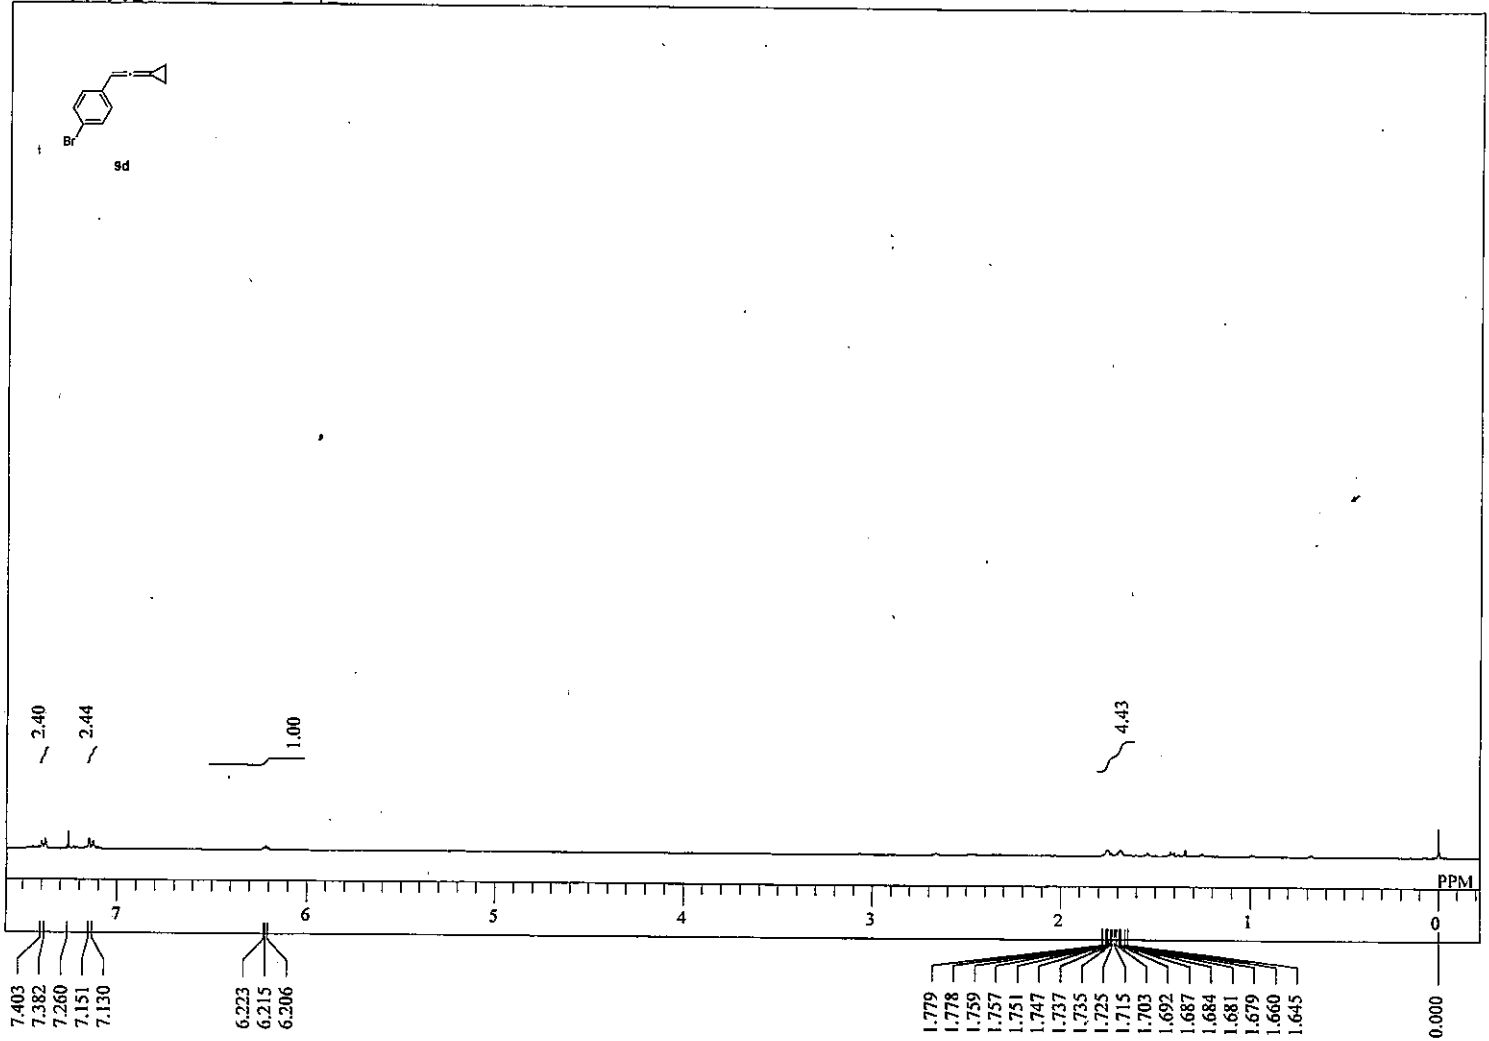

single pulse decoupled gated NOE  
D:\CEA\ft\H\j\j\hori\others\GSHH vdcp mo4 13c\_Carbon ft-1-1.a

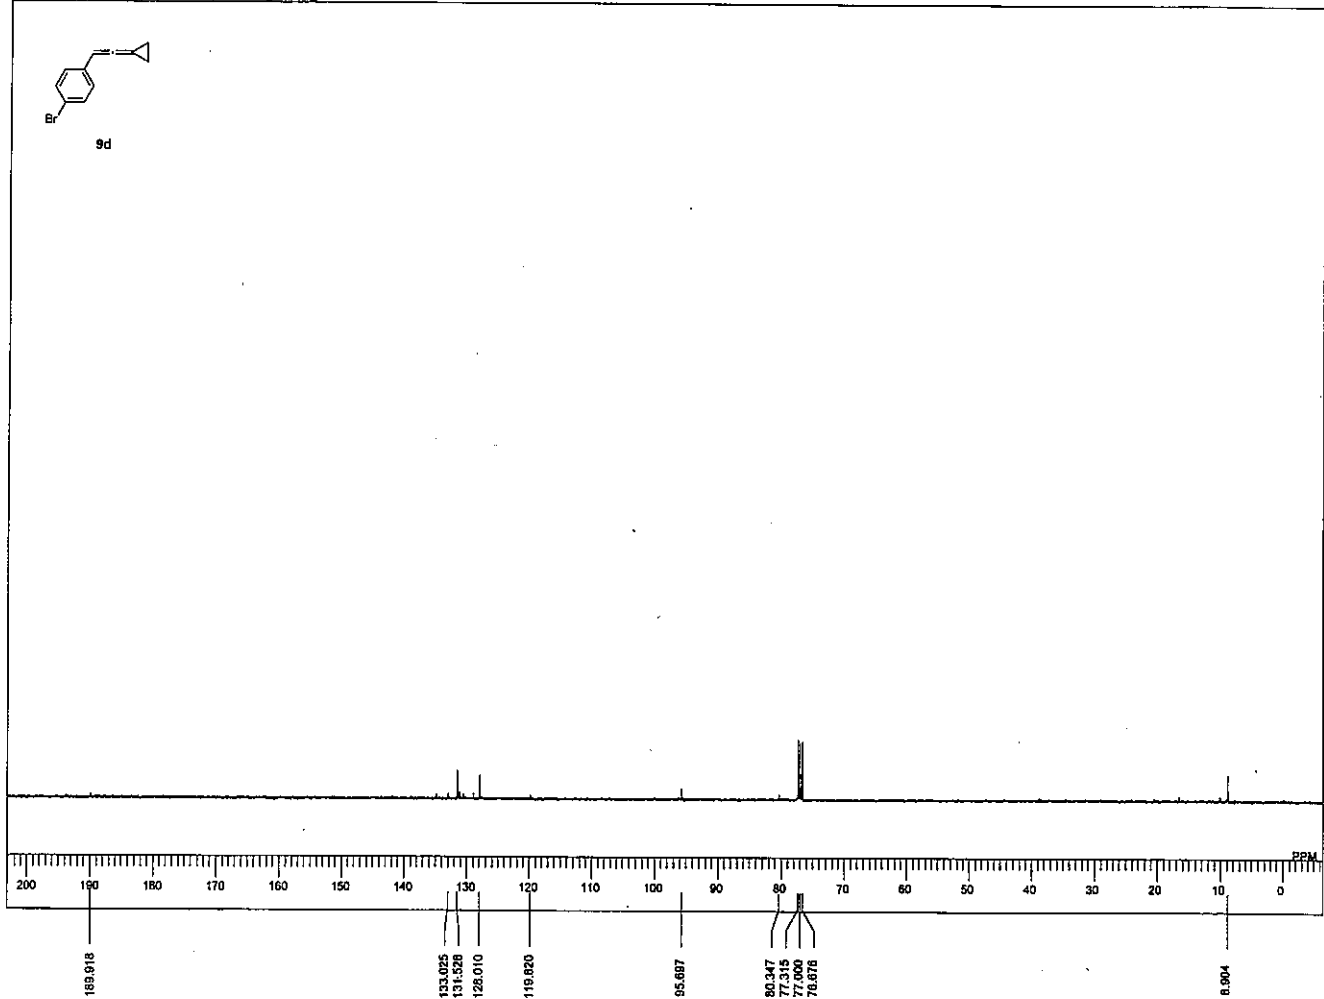

D:\CEA\ft\H\j\j\hori\others\GSHH vdcp mo4 1  
COMNT single pulse decou  
DATIM 2015-02-06 13:03:3  
OBNUC 13C  
EXMOD carbon.jpg  
OBFRQ 100.53 MHz  
OBSET 5.35 KHz  
OBFIN 5.88 Hz  
POINT 32768  
FREOU 31407.04 Hz  
SCANS 50  
ACQTM 1.9433 sec  
PD 2.0000 sec  
PWI 3.02 usec  
IRNUC 1H  
CTEMP 17.9 c  
SLVNT CDCL3  
EKREF 77.00 ppm  
BF 0.12 Hz  
RGAIN 50

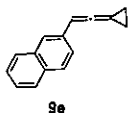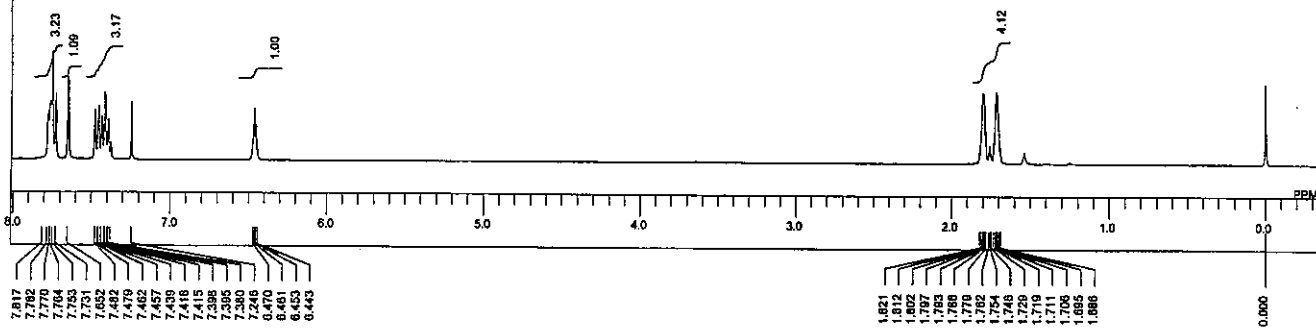

DFILE GSHH 10\_Proton\_  
COMNT single\_pulse  
DATIM 2015-01-28 10:25:2  
OBNUC 1H  
EXMOD proton.jxp  
OBFRQ 399.78 MHz  
OBSET 4.19 KHz  
OBFIN 7.29 Hz  
POINT 20480  
FREQU 9378.75 Hz  
SCANS 1  
ACQTM 2.1837 sec  
PD 5.0000 sec  
PW1 5.01 usec  
IRNUC 1H  
CTEMP 18.2 c  
SLVNT CDCL3  
EXREF 0.00 ppm  
BF 0.12 Hz  
RGAIN 42

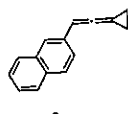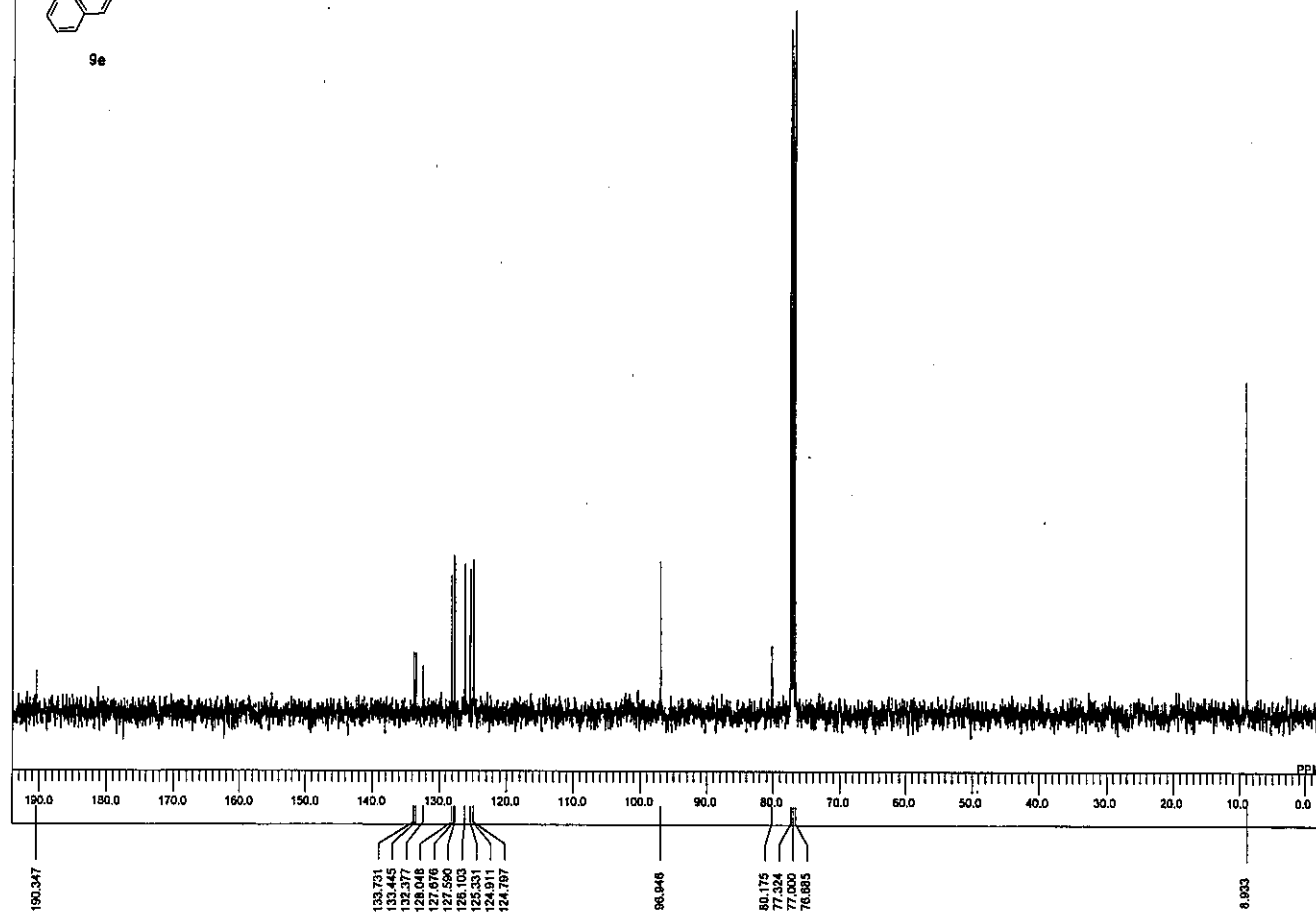

DFILE GSHH 10\_Carbon\_  
COMNT single\_pulse\_decou  
DATIM 2015-01-28 10:26:1  
OBNUC 13C  
EXMOD carbon.jxp  
OBFRQ 100.53 MHz  
OBSET 5.35 KHz  
OBFIN 5.88 Hz  
POINT 40660  
FREQU 39258.79 Hz  
SCANS 30  
ACQTM 1.0433 sec  
PD 2.0000 sec  
PW1 3.02 usec  
IRNUC 1H  
CTEMP 18.2 c  
SLVNT CDCL3  
EXREF 77.00 ppm  
BF 0.12 Hz  
RGAIN 50

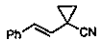

10a

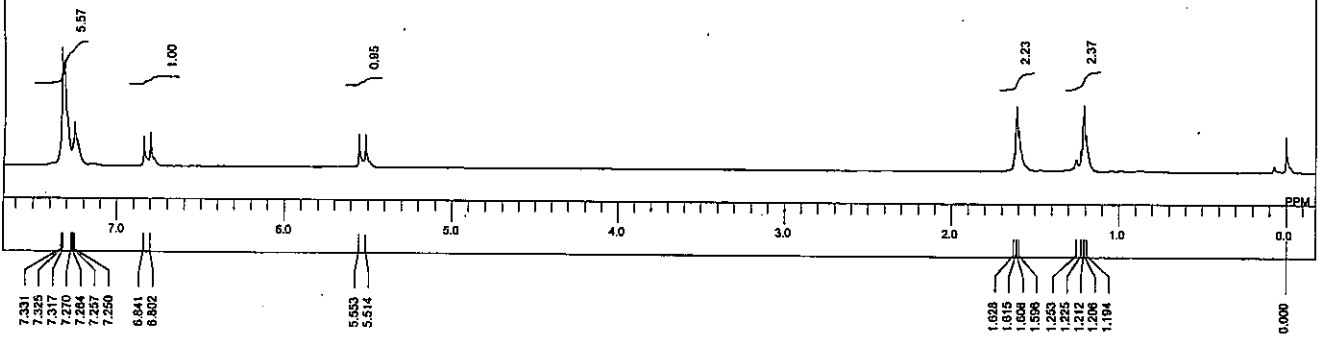

7.331  
7.326  
7.317  
7.270  
7.264  
7.257  
7.250

5.553  
5.514

1.628  
1.615  
1.608  
1.598  
1.285  
1.285  
1.212  
1.206  
1.194

DFILE GS:HH 3\_Proton\_R  
COMNT single\_pulse  
DATIM 2015-01-26 10:46:3  
OBNUC 1H  
EXMOD proton\_jsp  
OBFRQ 399.78 MHz  
OBSET 4.19 KHz  
OBFIN 7.29 Hz  
POINT 20480  
FREQI 9378.75 Hz  
SCANS 1  
ACQTM 2.1837 sec  
PD 5.0000 sec  
PW1 5.01 usec  
IRNUC 1H  
CTEMP 18.4 c  
SLVNT CDCL3  
EKREF 0.00 ppm  
BF 0.12 Hz  
RGAIN 40

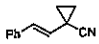

10a

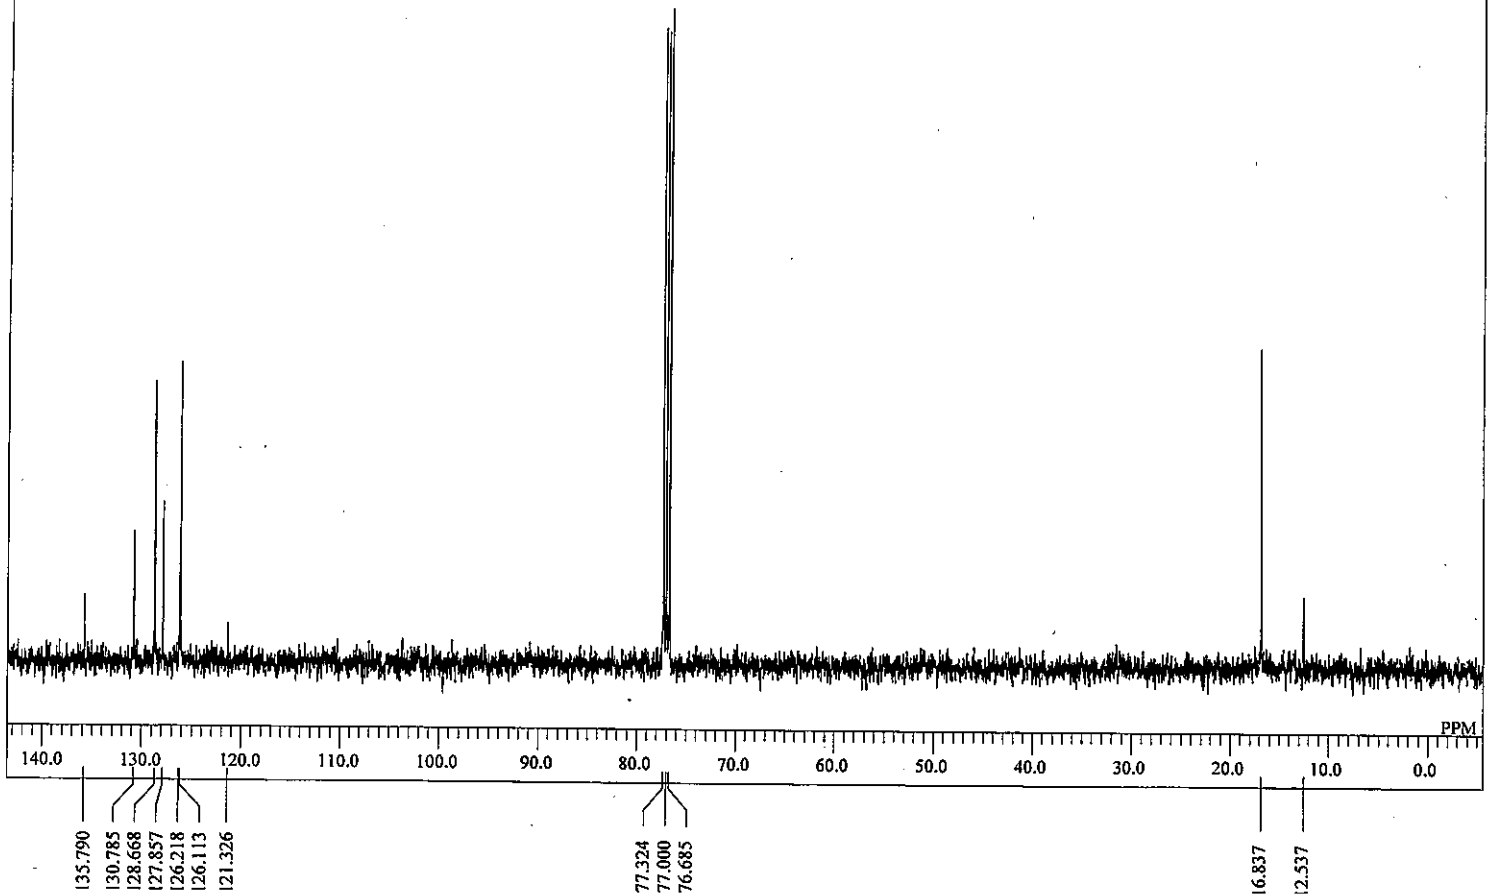

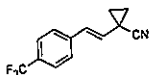

10b

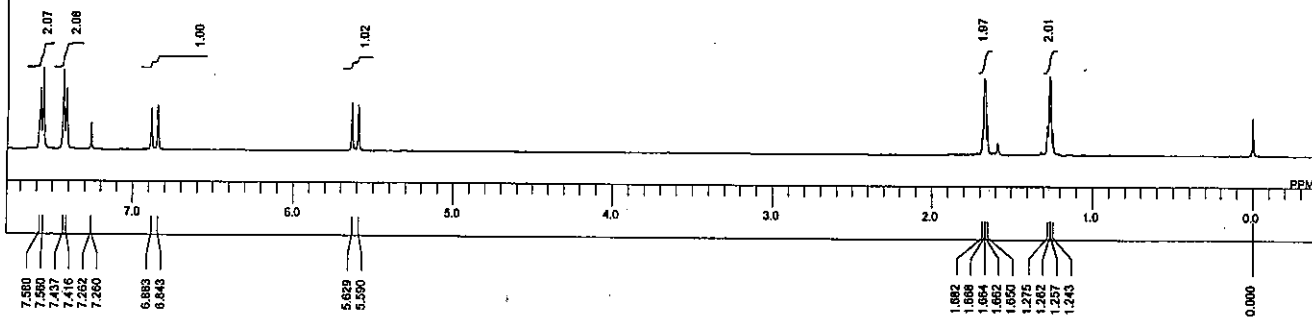

DFILE GSHH\_9\_Proton\_f  
COMNT single\_pulse  
DATIN 2015-01-26 10:30:11  
OBNUC 1H  
EXMOD proton.jp  
OBFRQ 399.76 MHz  
OBSETE 4.19 KHz  
OBFIN 7.29 Hz  
POINT 20480  
FREQU 9378.75 Hz  
SCANS 1  
ACQTM 2.1837 sec  
PD 5.0000 sec  
PWI 5.01 usec  
IRNUC 1H  
CTEMP 18.2 c  
SLVNT CDCL3  
EXREF 0.00 ppm  
BF 0.12 Hz  
RGAIN 40

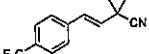

10b

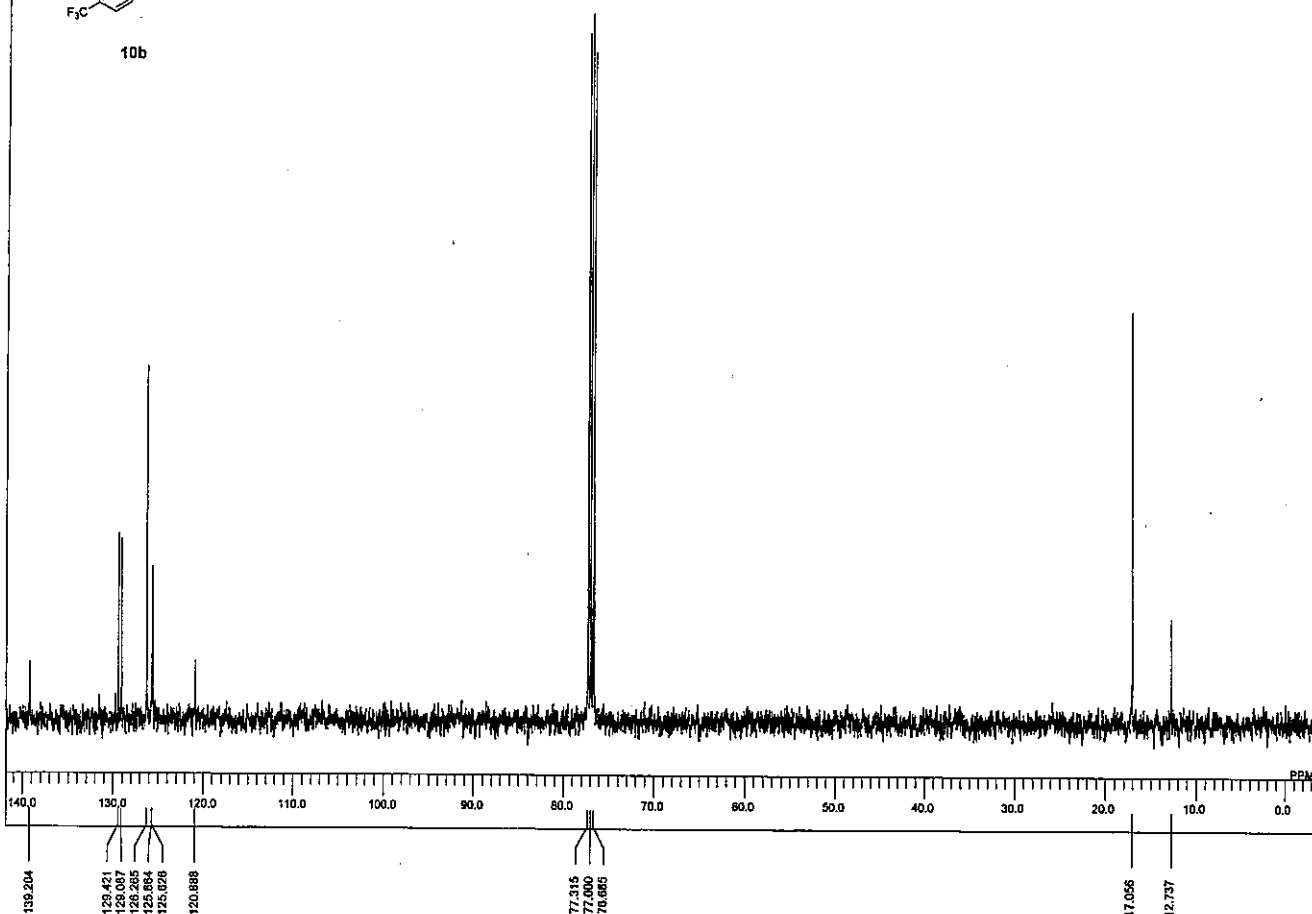

DFILE GSHH\_9\_Carbon\_f  
COMNT single\_pulse\_decou  
DATIN 2015-01-26 10:31:11  
OBNUC 13C  
EXMOD carbon.jp  
OBFRQ 100.53 MHz  
OBSETE 5.35 KHz  
OBFIN 5.85 Hz  
POINT 40960  
FREQU 39258.79 Hz  
SCANS 30  
ACQTM 1.0433 sec  
PD 2.0000 sec  
PWI 3.02 usec  
IRNUC 1H  
CTEMP 18.4 c  
SLVNT CDCL3  
EXREF 77.00 ppm  
BF 0.12 Hz  
RGAIN 50

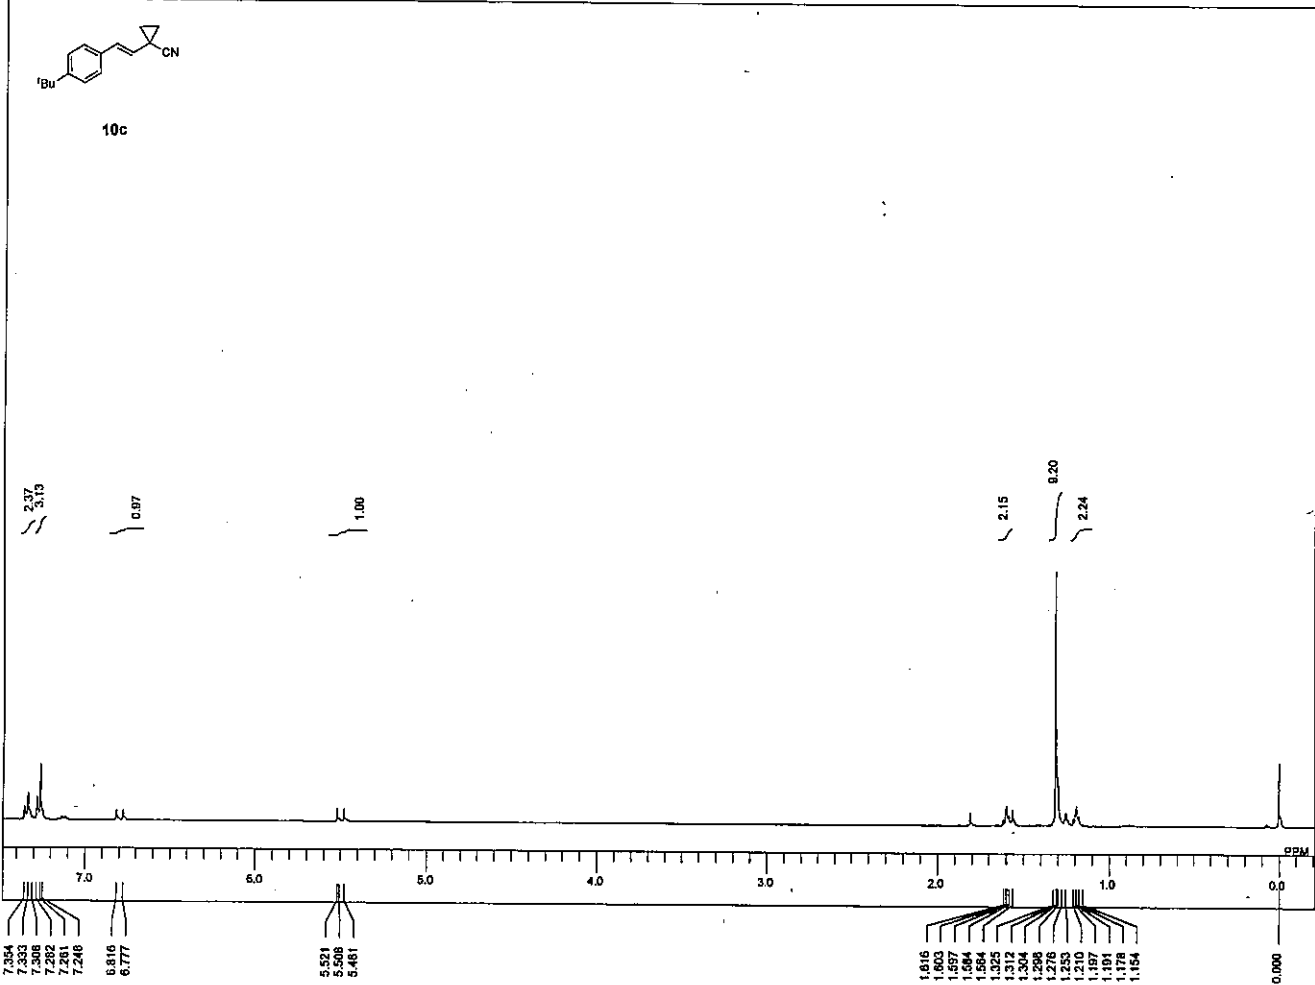

D:\EAS\1\H\1\_Vom16GSHH 5\_Proton\_R-1-1.jdf  
 GSHH 5\_Proton\_R  
 single\_pulse  
 2015-01-26 10:39:1  
 1H  
 proton.jpg  
 399.78 MHz  
 4.19 KHz  
 7.29 Hz  
 20450  
 9378.75 Hz  
 1  
 2.1637 sec  
 5.0000 sec  
 5.01 usec  
 1H  
 18.0 c  
 CDCl3  
 0.00 ppm  
 0.12 Hz  
 44

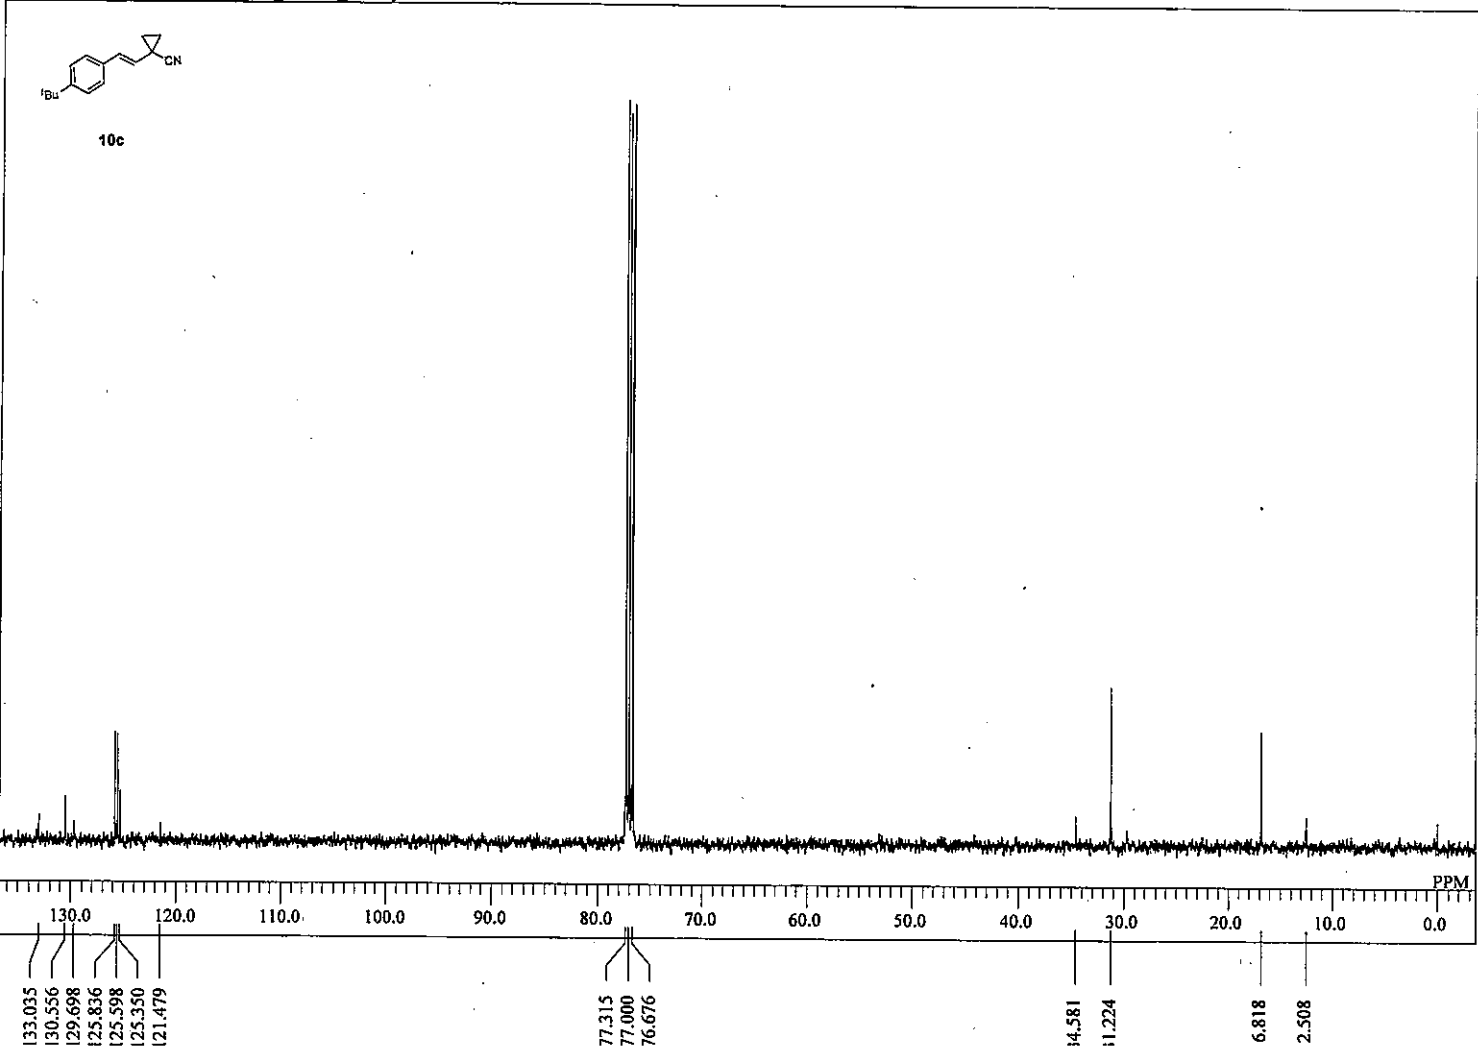



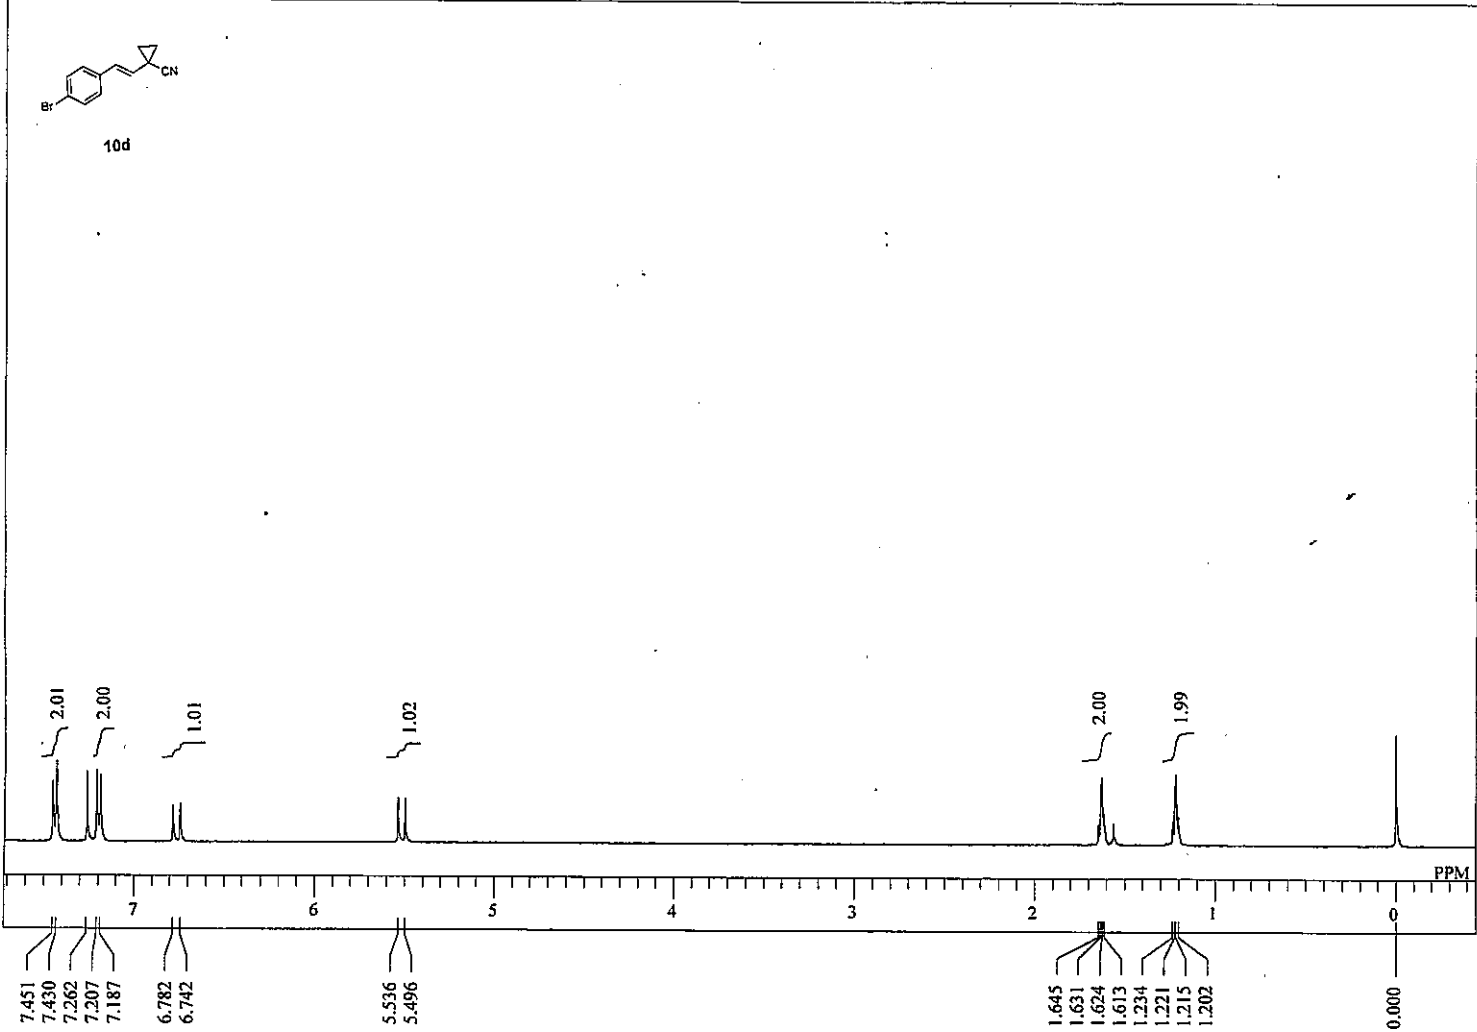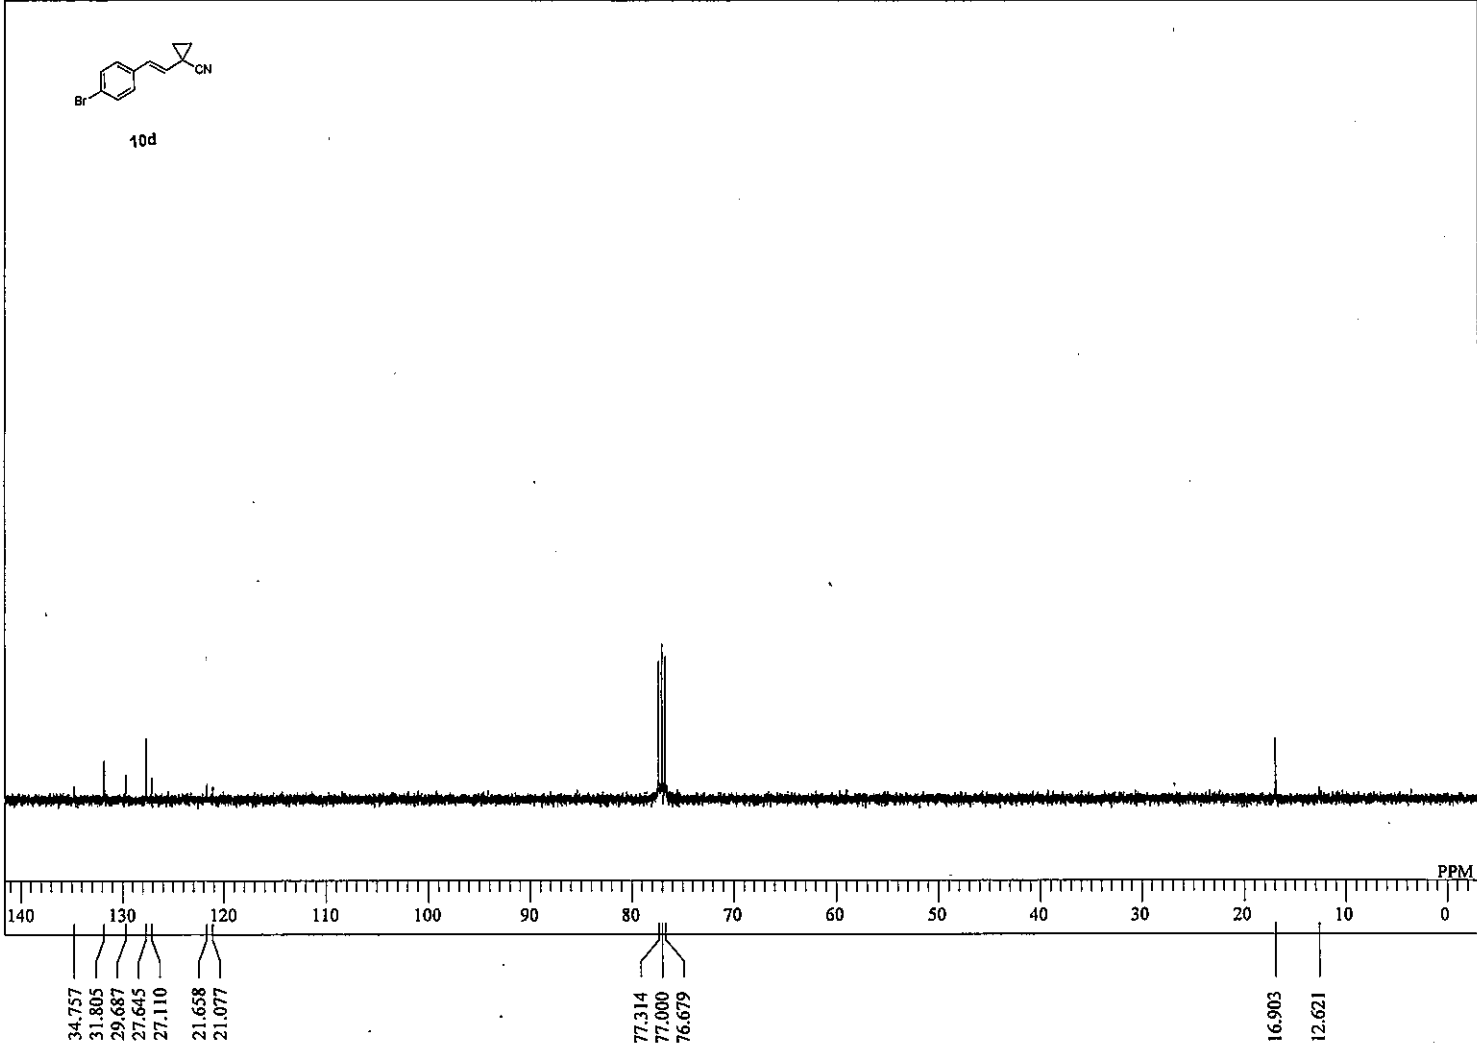

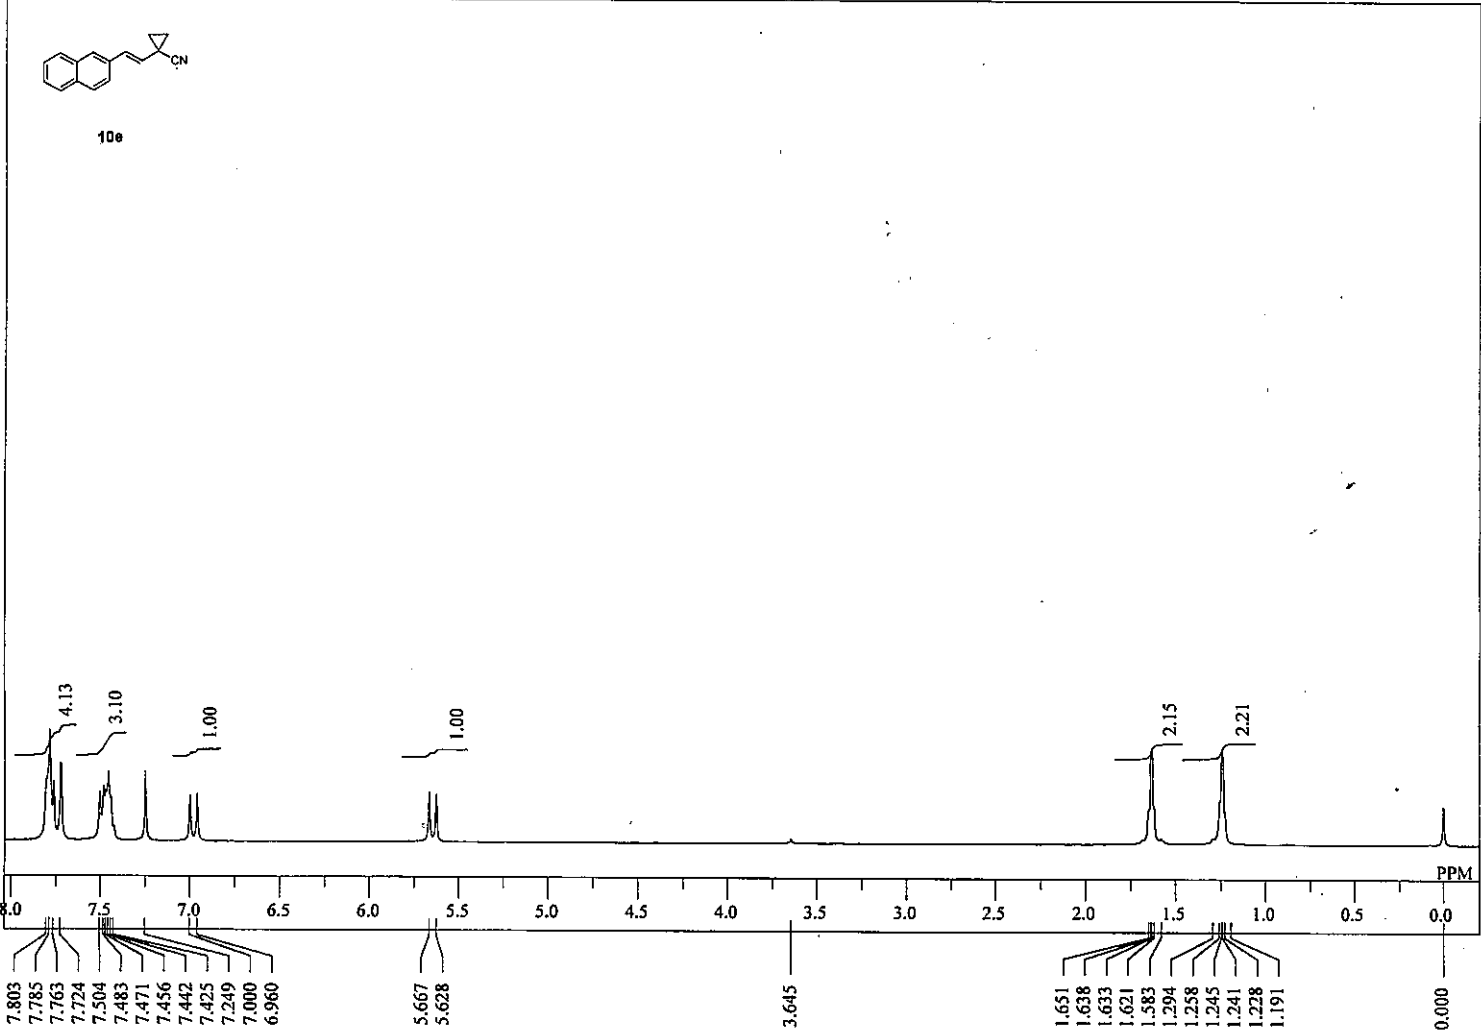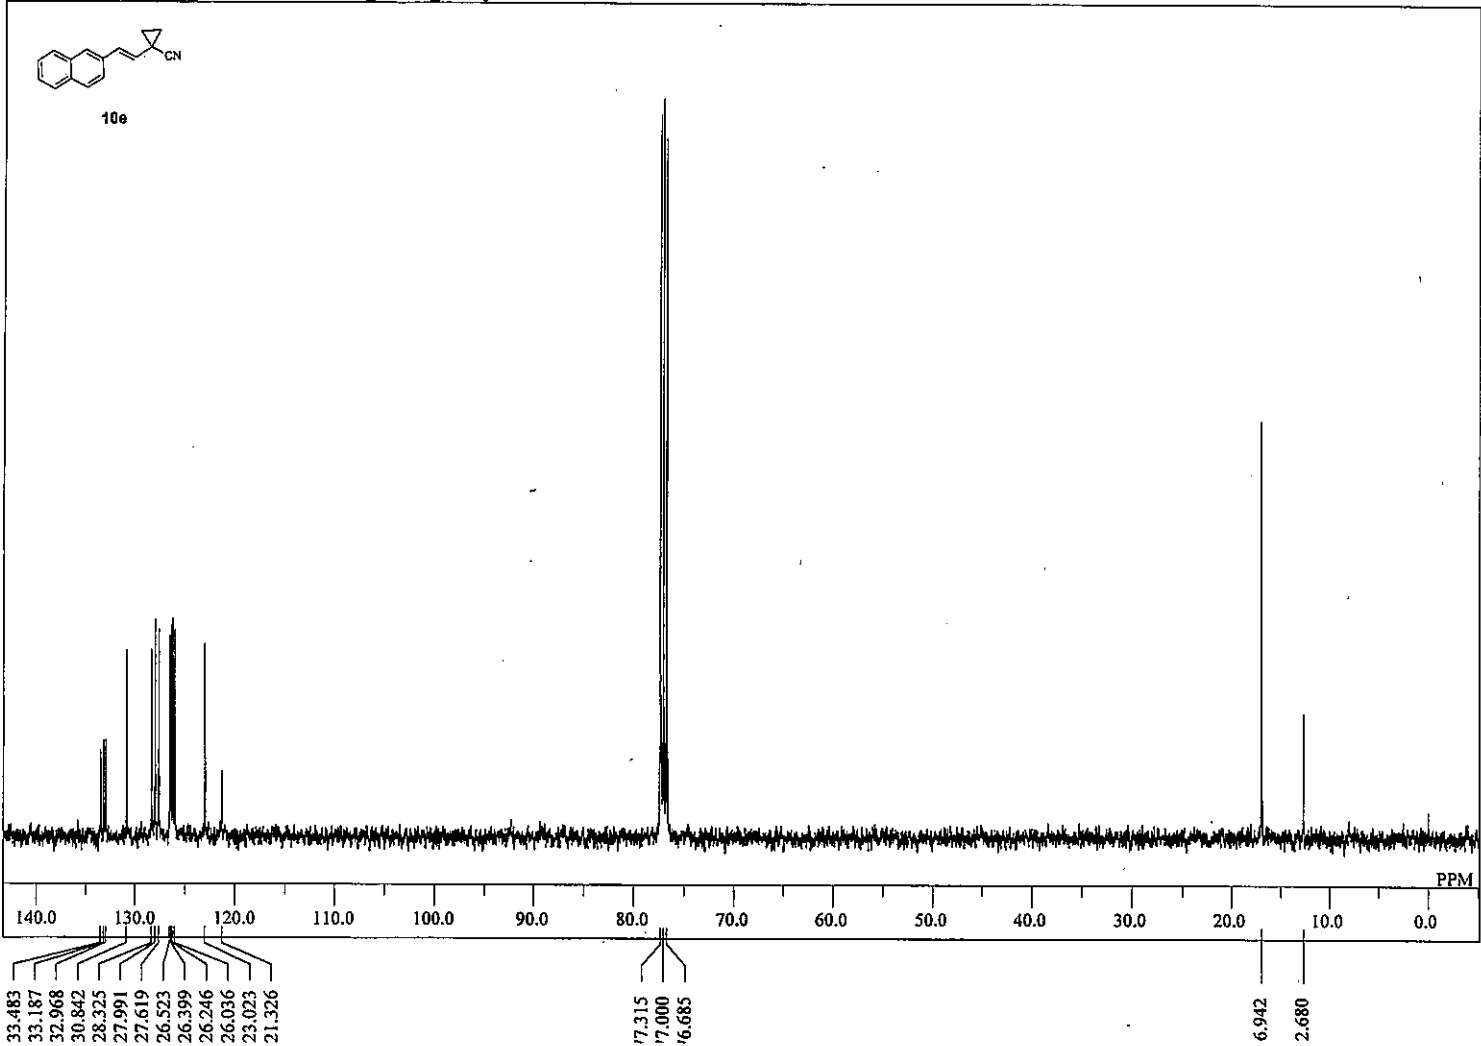

Supplement: c5cc01899d1.pdf [file c5cc01899d1.pdf]
